# Supplementary material for: Partial loss of CFIm25 causes learning deficits and aberrant neuronal alternative polyadenylation
Source: eLife. 2020 Apr 22;9:e50895. doi: 10.7554/eLife.50895 (PMC7176433; doi:10.7554/eLife.50895)
Supplement: Figure 4—source data 1. — Alternative polyadenylation (APA), likelihood ratio (lr), degrees of freedom (df), mass spectrometry (MS), fold change (FC). [file elife-50895-fig4-data1.xlsx]

## Sheet: Sheet1
Gene name	APA lr	APA df	APA p-value	APA adj_p-value	PAS locations	RNA length change	MS log2FC	MS p-value	MS adj_p-value
Cd47	34.6973	3	1.41151e-07	0.00081091	3'UTR(M),3'UTR(L),3'UTR(F)	0.0869288	-0.208866	0.17417	0.983372
Bnip3	29.5162	2	3.89619e-07	0.00111918	3'UTR(M)	-0.0778469	#N/A	#N/A	#N/A
Ddx6	28.2622	2	7.29368e-07	0.00139674	3'UTR(M)	-0.0705386	0.345488	0.108083	0.983372
Tgs1	23.9623	2	6.26118e-06	0.00899261	3'UTR(M),3'UTR(L),3'UTR(F)	0.462559	#N/A	#N/A	#N/A
Kcna4	23.2979	2	8.72829e-06	0.0093548	3'UTR(M),3'UTR(F)	0.241797	-0.464497	0.454362	0.983372
Ano2	19.5202	1	9.95435e-06	0.0093548	3'UTR(L),Intron	0.305388	#N/A	#N/A	#N/A
Nme6	19.0492	1	1.27392e-05	0.0093548	3'UTR(M),Intron	-0.756357	#N/A	#N/A	#N/A
1700063D05Rik	19.0066	1	1.30267e-05	0.0093548	ncRNA	-0.878363	#N/A	#N/A	#N/A
2310057M21Rik	24.948	3	1.58321e-05	0.00994188	3'UTR(M),3'UTR(L),3'UTR(F)	0.183991	#N/A	#N/A	#N/A
Flt1	24.6758	3	1.80481e-05	0.00994188	3'UTR(M),3'UTR(L),Intron	0.146309	#N/A	#N/A	#N/A
Col9a3	21.7384	2	1.90358e-05	0.00994188	3'UTR(M),Intron	0.450628	#N/A	#N/A	#N/A
Bves	17.6493	1	2.65607e-05	0.0123457	3'UTR(L),3'UTR(F)	0.923451	#N/A	#N/A	#N/A
A230001M10Rik	17.5533	1	2.79362e-05	0.0123457	ncRNA	-0.817537	#N/A	#N/A	#N/A
B3gnt3	15.7703	1	7.15163e-05	0.0292949	3'UTR(M)	0.676436	#N/A	#N/A	#N/A
Frmd5	26.1966	5	8.17343e-05	0.0292949	3'UTR(L),Intron	0.0111878	#N/A	#N/A	#N/A
Gan	15.4583	1	8.43443e-05	0.0292949	3'UTR(M),3'UTR(L)	-0.495845	0.479294	0.793917	0.987949
Aebp1	15.4066	1	8.66863e-05	0.0292949	3'UTR(M),3'UTR(F)	-0.339531	#N/A	#N/A	#N/A
Phf7	18.5273	2	9.48082e-05	0.0302596	3'UTR(M),3'UTR(L),CDS,Intron	0.642857	#N/A	#N/A	#N/A
Yes1	14.503	1	0.000139938	0.0423127	3'UTR(M),Intron	-0.434056	1.69965	0.140055	0.983372
Orc6	14.1781	1	0.000166299	0.0477694	3'UTR(F),Intron	-0.286624	#N/A	#N/A	#N/A
Kif5b	13.7756	1	0.000205997	0.0519445	3'UTR(M)	-0.160341	-0.0702858	0.75925	0.987949
Ddhd2	16.9738	2	0.000206153	0.0519445	3'UTR(M),Intron	-0.249996	-0.00703354	0.990427	0.997933
Bbof1	19.5743	3	0.000207959	0.0519445	3'UTR(M),3'UTR(F),Intron	0.0911154	#N/A	#N/A	#N/A
Ube2d-ps	16.7043	2	0.000235887	0.0558494	ncRNA	-0.183524	#N/A	#N/A	#N/A
Arhgef40	16.51	2	0.000259958	0.0558494	3'UTR(F),Intron	-0.150698	#N/A	#N/A	#N/A
Dclk2	13.3216	1	0.000262366	0.0558494	3'UTR(M),Intron	-0.249203	0.129004	0.602831	0.983372
Klhl32	13.1539	1	0.000286914	0.0558494	3'UTR(M),3'UTR(L),3'UTR(F)	0.377163	#N/A	#N/A	#N/A
Flrt2	16.2442	2	0.000296901	0.0558494	3'UTR(M),3'UTR(F)	0.0836653	#N/A	#N/A	#N/A
Stxbp2	16.211	2	0.000301876	0.0558494	3'UTR(M),3'UTR(F)	-0.15046	#N/A	#N/A	#N/A
Hist1h4k	16.1673	2	0.000308547	0.0558494	3'UTR(M),3'UTR(L)	0.270526	#N/A	#N/A	#N/A
Ap1m1	13.0062	1	0.000310453	0.0558494	3'UTR(M),3'UTR(L)	0.176632	0.0551234	0.778127	0.987949
Dnmt3a	16.1201	2	0.000315908	0.0558494	3'UTR(L),3'UTR(F),Intron	0.0362822	#N/A	#N/A	#N/A
Utp18	16.0063	2	0.0003344	0.0558494	3'UTR(M),Intron	-0.161855	#N/A	#N/A	#N/A
Slc4a4	12.8367	1	0.000339886	0.0558494	3'UTR(M),3'UTR(L),3'UTR(F)	-0.0922514	-0.14248	0.376441	0.983372
Chmp3	15.9717	2	0.000340248	0.0558494	3'UTR(M),3'UTR(F),Intron	-0.165471	0.494277	0.24851	0.983372
Il16	15.8358	2	0.00036417	0.0581155	3'UTR(M),3'UTR(L)	0.0245065	#N/A	#N/A	#N/A
Fut10	20.4675	4	0.000403712	0.0626844	3'UTR(M),3'UTR(L),Intron	0.0553191	#N/A	#N/A	#N/A
Rbmxl1	12.3478	1	0.000441516	0.0667502	3'UTR(M),3'UTR(L)	0.421053	-0.0630406	0.843968	0.987949
Gm11175	12.1906	1	0.000480317	0.0688891	ncRNA	-0.553605	#N/A	#N/A	#N/A
Tmem167	20.0732	4	0.000483043	0.0688891	3'UTR(M),3'UTR(F)	0.033457	#N/A	#N/A	#N/A
Traf2	12.1471	1	0.000491637	0.0688891	3'UTR(M),3'UTR(L)	-0.264403	#N/A	#N/A	#N/A
Snx9	11.7507	1	0.000608206	0.0831939	3'UTR(L),3'UTR(F),Intron	-0.442474	4.8211	0.0411517	0.983372
Bod1l	16.9849	3	0.0007118	0.0931624	3'UTR(M),CDS	-0.265141	#N/A	#N/A	#N/A
Upp2	14.4906	2	0.000713516	0.0931624	3'UTR(M),3'UTR(F),Intron	0.270233	#N/A	#N/A	#N/A
Dleu2	14.2968	2	0.000786128	0.0987883	ncRNA	-0.236279	#N/A	#N/A	#N/A
ENSMUSG00000073681	11.2622	1	0.000790994	0.0987883	Pseudogene	-0.554832	#N/A	#N/A	#N/A
Aph1a	14.1819	2	0.000832612	0.101335	3'UTR(M),3'UTR(F)	0.300432	#N/A	#N/A	#N/A
Tcaim	11.136	1	0.00084666	0.101335	3'UTR(M),Intron	-0.318212	#N/A	#N/A	#N/A
Etv3	11.0286	1	0.000897146	0.104656	3'UTR(M)	-0.428829	#N/A	#N/A	#N/A
Pdpk1	11.0006	1	0.000910841	0.104656	3'UTR(S),CDS,Intron	-0.227592	0.119945	0.764802	0.987949
Agtrap	10.937	1	0.000942623	0.106184	3'UTR(M)	-0.501401	#N/A	#N/A	#N/A
Tigar	10.7745	1	0.00102909	0.111132	3'UTR(M),3'UTR(L),3'UTR(F)	-0.171783	#N/A	#N/A	#N/A
Cacna1d	13.7229	2	0.00104741	0.111132	3'UTR(M)	-0.326822	#N/A	#N/A	#N/A
Auh	13.6669	2	0.00107711	0.111132	3'UTR(L),Intron	-0.11299	-0.0737774	0.770703	0.987949
Gpcpd1	10.6689	1	0.00108954	0.111132	3'UTR(M),5UTR	-0.265353	-0.0467669	0.968721	0.997933
R3hdm1	10.6579	1	0.00109604	0.111132	3'UTR(M),Intron	-0.124639	#N/A	#N/A	#N/A
Zfand3	13.6201	2	0.00110261	0.111132	3'UTR(M),Intron	0.0836632	#N/A	#N/A	#N/A
Ccdc181	10.6111	1	0.00112408	0.111342	3'UTR(F),Intron	0.200452	#N/A	#N/A	#N/A
Zfp182	13.5131	2	0.00116323	0.113267	3'UTR(M),Intron	-0.345275	#N/A	#N/A	#N/A
Pcsk2os1	15.8767	3	0.00120191	0.115083	ncRNA	0.298931	#N/A	#N/A	#N/A
Agtpbp1	13.4043	2	0.00122825	0.115677	3'UTR(M),5UTR,3'UTR(F)	-0.105554	0.0721124	0.941126	0.997933
Msantd2	10.393	1	0.00126496	0.116632	3'UTR(M),3'UTR(L),3'UTR(F)	0.243646	#N/A	#N/A	#N/A
Napepld	13.3112	2	0.0012868	0.116632	3'UTR(M),3'UTR(L)	-0.25587	#N/A	#N/A	#N/A
Rrp7a	10.3435	1	0.00129929	0.116632	3'UTR(M),3'UTR(F)	-0.511458	#N/A	#N/A	#N/A
Pam16	10.3017	1	0.00132904	0.117467	3'UTR(M),3'UTR(F)	0.273015	-0.952222	0.330186	0.983372
Ncoa4	13.1012	2	0.00142928	0.121558	3'UTR(M),3'UTR(L),3'UTR(F)	-0.0577527	#N/A	#N/A	#N/A
Fam228a	15.4998	3	0.0014357	0.121558	3'UTR(M),3'UTR(L)	0.281259	#N/A	#N/A	#N/A
Cep70	17.6586	4	0.00143881	0.121558	3'UTR(M),CDS,Intron	0.119189	#N/A	#N/A	#N/A
Osbpl8	10.1222	1	0.00146496	0.121974	3'UTR(M)	-0.122059	#N/A	#N/A	#N/A
Osgep	10.0932	1	0.00148818	0.122137	3'UTR(M),3'UTR(L),3'UTR(F)	-0.228953	-0.223955	0.756144	0.987949
1810058I24Rik	12.8872	2	0.0015907	0.127267	ncRNA	0.00133563	#N/A	#N/A	#N/A
Fam210a	17.429	4	0.00159499	0.127267	3'UTR(M)	-0.0220724	-1.041	0.171152	0.983372
Ermard	9.84718	1	0.00170093	0.133424	3'UTR(M),3'UTR(F)	0.467776	#N/A	#N/A	#N/A
Soat1	12.7325	2	0.0017186	0.133424	3'UTR(M),3'UTR(L)	-0.207953	#N/A	#N/A	#N/A
Rap1a	14.907	3	0.00189788	0.14115	3'UTR(M),Intron	-0.0018007	0.247231	0.486253	0.983372
Hdgf	9.63939	1	0.00190448	0.14115	3'UTR(M)	-0.116676	-0.0989778	0.56459	0.983372
Eif2d	12.4934	2	0.00193687	0.14115	3'UTR(M),3'UTR(F),Intron	-0.267853	#N/A	#N/A	#N/A
Ell2	14.8623	3	0.00193822	0.14115	3'UTR(M),Intron	-0.179037	#N/A	#N/A	#N/A
Ptch1	9.60455	1	0.00194096	0.14115	3'UTR(L),Intron	-0.206737	#N/A	#N/A	#N/A
Armc1	9.47379	1	0.00208428	0.149677	3'UTR(M)	-0.122325	-0.241227	0.349515	0.983372
Chpt1	14.625	3	0.00216686	0.153686	3'UTR(M),Intron	0.0414953	#N/A	#N/A	#N/A
Evi5	12.2164	2	0.00222453	0.155853	3'UTR(M),Intron	-0.167523	#N/A	#N/A	#N/A
Prpf38a	9.22772	1	0.00238378	0.164998	3'UTR(M)	0.157842	#N/A	#N/A	#N/A
Zscan22	12.0059	2	0.00247147	0.167509	3'UTR(M),3'UTR(L),Intron	-0.0397755	#N/A	#N/A	#N/A
A730017L22Rik	16.4434	4	0.00247838	0.167509	ncRNA	-0.139888	#N/A	#N/A	#N/A
Plppr1	9.12438	1	0.00252225	0.167943	3'UTR(L),3'UTR(F)	0.508611	#N/A	#N/A	#N/A
Cfl2	11.9028	2	0.00260216	0.167943	3'UTR(M),CDS	-0.094179	0.0486782	0.830974	0.987949
Lsm14a	9.05374	1	0.00262158	0.167943	3'UTR(M)	0.132091	0.351913	0.600441	0.983372
Mfsd8	9.03934	1	0.00264232	0.167943	3'UTR(M)	-0.237727	#N/A	#N/A	#N/A
Mrc2	9.03454	1	0.00264925	0.167943	3'UTR(M),Intron	0.190969	#N/A	#N/A	#N/A
Fam71e1	9.01967	1	0.00267089	0.167943	3'UTR(L),3'UTR(F)	0.282443	#N/A	#N/A	#N/A
Slc25a53	16.237	4	0.00271711	0.167943	3'UTR(L),Intron,3'UTR(F)	0.0616375	#N/A	#N/A	#N/A
Map4k2	11.8152	2	0.00271866	0.167943	3'UTR(M),3'UTR(F),Intron	0.102315	2.08332	0.0898498	0.983372
Tango6	11.7713	2	0.00277909	0.169849	3'UTR(M),3'UTR(L),3'UTR(F)	0.121872	#N/A	#N/A	#N/A
Wdr91	8.91335	1	0.00283093	0.171197	3'UTR(M),3'UTR(L),3'UTR(F)	0.290913	0.681525	0.302264	0.983372
Arhgef11	8.87088	1	0.00289755	0.1734	3'UTR(M),3'UTR(L),Intron	-0.466789	1.09566	0.376414	0.983372
N4bp2l1	11.6496	2	0.00295337	0.174919	Intron,3'UTR(F)	0.0549391	#N/A	#N/A	#N/A
Mthfr	8.79022	1	0.0030285	0.175978	3'UTR(M),Intron	0.416183	#N/A	#N/A	#N/A
Lrch3	8.7878	1	0.00303251	0.175978	3'UTR(M),3'UTR(L),Intron	-0.299164	#N/A	#N/A	#N/A
Zranb2	8.7294	1	0.00313119	0.178211	3'UTR(M),CDS,3'UTR(F)	-0.176314	#N/A	#N/A	#N/A
Eif2b5	8.72833	1	0.00313304	0.178211	3'UTR(F),Intron	-0.174634	#N/A	#N/A	#N/A
2810403A07Rik	8.70603	1	0.0031716	0.178636	3'UTR(M),Intron	-0.133497	#N/A	#N/A	#N/A
Dock10	8.66913	1	0.00323646	0.179236	3'UTR(L),Intron	-0.119445	0.889158	0.17487	0.983372
Gm15341	8.66452	1	0.00324465	0.179236	ncRNA	-0.60142	#N/A	#N/A	#N/A
Traf3	8.61947	1	0.00332589	0.181974	3'UTR(M),3'UTR(L),Intron	-0.126431	0.725071	0.255167	0.983372
Gm9800	8.53351	1	0.00348667	0.185865	Pseudogene	-0.197318	#N/A	#N/A	#N/A
Map3k10	11.3045	2	0.00350954	0.185865	Intron,3'UTR(F)	-7.52978e-05	#N/A	#N/A	#N/A
Nup98	8.50543	1	0.00354089	0.185865	3'UTR(M),3'UTR(L),Intron	-0.559553	#N/A	#N/A	#N/A
Rpe	8.46918	1	0.00361214	0.185865	3'UTR(M)	-0.172227	0.313583	0.753062	0.987949
Rnft1	8.46587	1	0.00361872	0.185865	3'UTR(M)	0.387805	#N/A	#N/A	#N/A
Zfr	8.45952	1	0.00363137	0.185865	3'UTR(M),CDS	-0.122683	0.197129	0.612753	0.983372
Ppwd1	11.2148	2	0.00367058	0.185865	3'UTR(M),Intron	0.0690049	#N/A	#N/A	#N/A
Smc4	8.40923	1	0.00373322	0.185865	CDS,3'UTR(F)	0.621306	#N/A	#N/A	#N/A
Exo5	8.40853	1	0.00373465	0.185865	3'UTR(M),Intron	-0.315385	#N/A	#N/A	#N/A
Smarcad1	15.5089	4	0.0037542	0.185865	3'UTR(M),Intron	0.164106	#N/A	#N/A	#N/A
Hpgds	11.16	2	0.0037726	0.185865	3'UTR(M),3'UTR(L),3'UTR(F)	0.148251	#N/A	#N/A	#N/A
Szrd1	8.38407	1	0.00378524	0.185865	3'UTR(M),3'UTR(L)	0.226532	#N/A	#N/A	#N/A
Thap12	11.133	2	0.00382381	0.186168	3'UTR(M),3'UTR(F),Intron	-0.13059	#N/A	#N/A	#N/A
Ercc6	8.32705	1	0.0039059	0.187537	3'UTR(M)	-0.359593	#N/A	#N/A	#N/A
Nol12	8.30103	1	0.00396226	0.187537	3'UTR(L),3'UTR(F)	0.0927074	#N/A	#N/A	#N/A
Ppp6r1	11.0512	2	0.00398356	0.187537	3'UTR(M),3'UTR(L),3'UTR(F)	0.0522238	#N/A	#N/A	#N/A
A330069E16Rik	8.29017	1	0.00398603	0.187537	ncRNA	-0.4758	#N/A	#N/A	#N/A
Rcor3	13.3083	3	0.00401516	0.187537	3'UTR(M),Intron,3'UTR(F)	0.0070409	1.35299	0.422095	0.983372
Asf1a	11.0186	2	0.00404901	0.187593	3'UTR(M),3'UTR(F)	0.120125	#N/A	#N/A	#N/A
Dnajc24	13.2658	3	0.00409561	0.187718	3'UTR(M),3'UTR(L),3'UTR(F)	-0.00117187	-0.574116	0.390832	0.983372
Pibf1	10.9852	2	0.00411705	0.187718	3'UTR(F),CDS,Intron	-0.353474	#N/A	#N/A	#N/A
Wdpcp	8.20659	1	0.00417385	0.187754	3'UTR(L),3'UTR(F),Intron	-0.473358	#N/A	#N/A	#N/A
Mark2	10.9436	2	0.00420358	0.187754	3'UTR(M),3'UTR(L)	-0.0873603	0.257378	0.410648	0.983372
Prepl	8.18841	1	0.0042159	0.187754	3'UTR(M),3'UTR(L)	-0.0922789	-0.0339284	0.882322	0.993444
H3f3a	8.16471	1	0.00427133	0.18876	3'UTR(M),Intron	-0.169613	#N/A	#N/A	#N/A
Zfp53	13.1308	3	0.00436217	0.191303	3'UTR(M),3'UTR(F),Intron	-0.143031	#N/A	#N/A	#N/A
Gm10033	10.8519	2	0.00440084	0.191536	ncRNA	0.0206266	#N/A	#N/A	#N/A
Dffb	8.08153	1	0.00447187	0.192301	3'UTR(L),Intron	-0.376359	#N/A	#N/A	#N/A
Mtmr12	8.07608	1	0.00448534	0.192301	3'UTR(M),3'UTR(L)	0.216068	#N/A	#N/A	#N/A
Stard4	8.02258	1	0.00461976	0.195276	3'UTR(M),3'UTR(L)	-0.428612	#N/A	#N/A	#N/A
Nudt17	8.02143	1	0.00462271	0.195276	3'UTR(L),3'UTR(F)	-0.404422	-2.69771	0.0521701	0.983372
Grem1	10.6991	2	0.00475017	0.198631	3'UTR(M),3'UTR(L)	-0.216092	#N/A	#N/A	#N/A
Mnat1	10.6903	2	0.00477129	0.198631	3'UTR(M),3'UTR(F),Intron	0.0546273	#N/A	#N/A	#N/A
4933439C10Rik	10.6556	2	0.00485477	0.200652	ncRNA	0.102468	#N/A	#N/A	#N/A
Tmem125	7.90123	1	0.00494013	0.20198	3'UTR(M),3'UTR(F)	-0.273751	#N/A	#N/A	#N/A
Abhd17b	7.88396	1	0.00498752	0.20198	3'UTR(M),Intron	-0.0923155	#N/A	#N/A	#N/A
Znhit6	12.8414	3	0.00499237	0.20198	3'UTR(M),3'UTR(F),Intron	-0.215146	#N/A	#N/A	#N/A
Jmy	14.8075	4	0.00511758	0.205598	3'UTR(M),Intron	0.00824021	-0.821335	0.410763	0.983372
Fzd8	7.80098	1	0.00522179	0.208301	3'UTR(M)	-0.417356	#N/A	#N/A	#N/A
Sv2c	10.4962	2	0.00525739	0.208301	3'UTR(L),Intron	0.142529	-2.25099	0.179181	0.983372
Peg3	7.72345	1	0.00545082	0.208841	3'UTR(M),3'UTR(L)	-0.110234	#N/A	#N/A	#N/A
Glcci1	14.6344	4	0.00552283	0.208841	3'UTR(M),Intron	0.0499699	0.896505	0.361724	0.983372
Gm45916	7.69365	1	0.00554153	0.208841	ncRNA	0.439605	#N/A	#N/A	#N/A
Eef2k	12.607	3	0.00556847	0.208841	3'UTR(M),3'UTR(L),3'UTR(F)	0.0966046	#N/A	#N/A	#N/A
4930503L19Rik	7.66721	1	0.00562333	0.208841	3'UTR(M),Intron	-0.197333	#N/A	#N/A	#N/A
Rtl4	7.6663	1	0.00562618	0.208841	3'UTR(S),Intron	-0.619517	#N/A	#N/A	#N/A
Fn1	7.65482	1	0.00566208	0.208841	3'UTR(M),Intron	0.171187	2.32977	0.455393	0.983372
Ddr2	10.3413	2	0.00568097	0.208841	3'UTR(M),3'UTR(F)	-0.279221	#N/A	#N/A	#N/A
Mettl1	10.3291	2	0.00571553	0.208841	3'UTR(M),3'UTR(L),3'UTR(F)	-0.217084	#N/A	#N/A	#N/A
9230114K14Rik	10.3285	2	0.00571737	0.208841	ncRNA	0.269482	#N/A	#N/A	#N/A
Pced1a	12.5495	3	0.00571928	0.208841	3'UTR(M),Intron,3'UTR(F)	0.0748207	#N/A	#N/A	#N/A
Eefsec	10.3158	2	0.00575385	0.208841	Intron,3'UTR(F)	-0.156756	-0.149736	0.874391	0.993444
Slc39a11	7.6241	1	0.00575933	0.208841	3'UTR(M),Intron	-0.325386	3.71272	0.0371824	0.983372
Rabgef1	10.2967	2	0.005809	0.208841	3'UTR(L),Intron	-0.0029931	0.318293	0.62509	0.983372
4930578M01Rik	10.2786	2	0.00586174	0.208841	ncRNA	0.386412	#N/A	#N/A	#N/A
Cdc73	14.4662	4	0.00594663	0.208841	3'UTR(M)	0.0999213	#N/A	#N/A	#N/A
Nck1	10.2494	2	0.00594813	0.208841	3'UTR(M),3'UTR(L)	0.00635685	0.122255	0.830188	0.987949
Uba6	14.4638	4	0.00595279	0.208841	3'UTR(M),3'UTR(L)	0.0746007	#N/A	#N/A	#N/A
Ppp4r3b	12.4541	3	0.00597895	0.208841	3'UTR(M)	-0.121356	#N/A	#N/A	#N/A
Itgb3bp	7.54727	1	0.00601011	0.208841	3'UTR(M),3'UTR(F)	0.351946	#N/A	#N/A	#N/A
Adamts2	7.54	1	0.00603439	0.208841	CDS,Intron	0.604233	#N/A	#N/A	#N/A
Ankrd26	10.1986	2	0.00610103	0.209883	3'UTR(L),CDS,Intron	-0.39481	#N/A	#N/A	#N/A
Pik3c2a	12.3968	3	0.00614049	0.209983	3'UTR(M),3'UTR(L),Intron	-0.111816	#N/A	#N/A	#N/A
Smad9	7.48195	1	0.00623204	0.211374	3'UTR(M)	-0.316651	#N/A	#N/A	#N/A
Utp23	10.1488	2	0.00625476	0.211374	3'UTR(M),CDS	0.0146977	#N/A	#N/A	#N/A
Parp8	7.43456	1	0.00639832	0.212678	3'UTR(M),Intron,3'UTR(F)	0.186843	#N/A	#N/A	#N/A
Slc35b4	10.0848	2	0.00645821	0.212678	3'UTR(M)	-0.102718	#N/A	#N/A	#N/A
Qpctl	7.41665	1	0.00646229	0.212678	3'UTR(M)	-0.0921343	#N/A	#N/A	#N/A
Vps26b	12.2807	3	0.00648098	0.212678	3'UTR(M),3'UTR(L)	-0.00335343	0.0603143	0.805259	0.987949
Lsm10	7.41029	1	0.00648517	0.212678	3'UTR(M)	0.368999	#N/A	#N/A	#N/A
Rcn1	10.04	2	0.00660458	0.212678	3'UTR(M),3'UTR(L)	0.150885	-3.29342	0.386821	0.983372
Tubgcp4	10.0155	2	0.00668589	0.212678	3'UTR(M),3'UTR(F)	-0.0400478	#N/A	#N/A	#N/A
4930430F08Rik	7.35201	1	0.00669879	0.212678	3'UTR(M),CDS,3'UTR(F)	-0.0901216	#N/A	#N/A	#N/A
St6galnac5	10.0115	2	0.00669946	0.212678	3'UTR(M),3'UTR(L)	0.095533	#N/A	#N/A	#N/A
Marcks	10.0083	2	0.00671004	0.212678	3'UTR(M),3'UTR(L)	-0.0788536	-0.172899	0.230832	0.983372
Zfp451	16.039	5	0.00673352	0.212678	3'UTR(M),Intron	-0.0518187	#N/A	#N/A	#N/A
Tulp4	9.97407	2	0.00682588	0.212678	5UTR,Intron	-0.172282	#N/A	#N/A	#N/A
Pgm1	7.31761	1	0.00682823	0.212678	3'UTR(M),3'UTR(F)	0.441419	-0.787185	0.496443	0.983372
Sf1	9.96129	2	0.00686961	0.212678	3'UTR(M),Intron	-0.132057	-0.0265341	0.931337	0.997933
Zfp568	7.27679	1	0.00698514	0.212678	3'UTR(L),Intron	-0.607294	#N/A	#N/A	#N/A
Slc7a6	7.27356	1	0.0069977	0.212678	3'UTR(M)	-0.260036	#N/A	#N/A	#N/A
Zfp944	7.26898	1	0.00701557	0.212678	CDS,3'UTR(F)	-0.307051	#N/A	#N/A	#N/A
4932443I19Rik	7.25778	1	0.00705944	0.212678	3'UTR(S),Intron	0.415716	#N/A	#N/A	#N/A
Ppp1r12a	9.90112	2	0.00707943	0.212678	3'UTR(M),3'UTR(F)	-0.0899472	0.284435	0.472431	0.983372
Tardbp	9.90005	2	0.00708325	0.212678	3'UTR(M),3'UTR(L),Intron,3'UTR(F)	-0.156903	#N/A	#N/A	#N/A
Kcna2	7.23089	1	0.00716596	0.212678	3'UTR(M),3'UTR(L)	0.0964655	-0.371404	0.32593	0.983372
Slfn5	7.22664	1	0.00718295	0.212678	3'UTR(M),3'UTR(L)	0.295502	#N/A	#N/A	#N/A
Phf8	9.83632	2	0.00731259	0.212678	3'UTR(M),Intron	-0.0908325	#N/A	#N/A	#N/A
Cdh8	9.81788	2	0.0073803	0.212678	Intron	-0.158033	-0.0123072	0.983707	0.997933
Mogs	7.17448	1	0.00739478	0.212678	CDS,3'UTR(F)	-0.109043	-0.271963	0.765371	0.987949
Sbno1	11.9796	3	0.0074534	0.212678	3'UTR(M),3'UTR(L),Intron	0.0998027	#N/A	#N/A	#N/A
Gpr176	7.15876	1	0.00745986	0.212678	3'UTR(L),Intron	0.331374	#N/A	#N/A	#N/A
Rbbp4	7.15738	1	0.00746561	0.212678	3'UTR(M),3'UTR(L)	0.118732	0.526149	0.064865	0.983372
Tnik	11.9674	3	0.00749584	0.212678	3'UTR(M)	-0.0971094	#N/A	#N/A	#N/A
Fam69a	11.9673	3	0.00749601	0.212678	3'UTR(M)	-0.00322195	#N/A	#N/A	#N/A
Gnb1l	11.9601	3	0.00752098	0.212678	3'UTR(F),Intron	0.271653	#N/A	#N/A	#N/A
Ugt8a	9.77629	2	0.0075354	0.212678	3'UTR(M),Intron	-0.0135906	#N/A	#N/A	#N/A
Ddx10	9.77373	2	0.00754505	0.212678	3'UTR(M),CDS	-0.0348579	#N/A	#N/A	#N/A
D11Wsu47e	7.13129	1	0.00757503	0.212678	3'UTR(M),3'UTR(F)	0.295925	#N/A	#N/A	#N/A
Id2	7.12798	1	0.00758902	0.212678	3'UTR(M),3'UTR(L),Intron	-0.117103	#N/A	#N/A	#N/A
Bcl2l13	7.10746	1	0.0076764	0.214082	3'UTR(M)	-0.206016	0.512816	0.0693382	0.983372
Zfp217	7.0872	1	0.00776364	0.215446	3'UTR(L),Intron	0.472989	#N/A	#N/A	#N/A
Arl15	9.70719	2	0.0078003	0.215446	3'UTR(M),Intron	0.0289767	#N/A	#N/A	#N/A
Sh3d19	11.8573	3	0.00788838	0.216836	3'UTR(M),Intron	0.206925	#N/A	#N/A	#N/A
Gstt2	7.03985	1	0.00797157	0.218079	3'UTR(M),3'UTR(L),3'UTR(F)	-0.696895	#N/A	#N/A	#N/A
Rp2	9.64949	2	0.0080286	0.218599	3'UTR(L),Intron	0.000573883	1.53167	0.0269279	0.983372
Zfp334	9.6021	2	0.00822111	0.222438	3'UTR(M),3'UTR(L)	0.0852423	#N/A	#N/A	#N/A
Prpf39	9.58868	2	0.00827647	0.222438	3'UTR(M),3'UTR(L),Intron	-0.0480597	#N/A	#N/A	#N/A
Kcnj4	6.97065	1	0.00828576	0.222438	3'UTR(M)	0.0928683	1.38435	0.284034	0.983372
Det1	6.95843	1	0.00834252	0.222794	3'UTR(M),Intron	-0.465584	#N/A	#N/A	#N/A
Cars	6.94888	1	0.00838718	0.222794	3'UTR(M),Intron,3'UTR(F)	-0.0751836	-0.441952	0.238027	0.983372
Ptprb	6.92552	1	0.00849741	0.222794	3'UTR(L),3'UTR(F)	-0.338493	#N/A	#N/A	#N/A
Nanos1	9.5161	2	0.00858233	0.222794	3'UTR(M),3'UTR(L),3'UTR(F)	0.129174	#N/A	#N/A	#N/A
Kdsr	6.90611	1	0.00859016	0.222794	3'UTR(M)	0.146368	2.22399	0.321552	0.983372
Khnyn	9.50456	2	0.008632	0.222794	3'UTR(M)	-0.0113167	#N/A	#N/A	#N/A
Tigd2	6.8973	1	0.00863258	0.222794	5UTR,3'UTR(F)	-0.364784	#N/A	#N/A	#N/A
Tbck	6.89693	1	0.00863439	0.222794	3'UTR(M)	-0.143084	#N/A	#N/A	#N/A
Il1rap	11.6493	3	0.00868629	0.222794	3'UTR(S),Intron	0.0804666	#N/A	#N/A	#N/A
Greb1l	6.88611	1	0.00868682	0.222794	3'UTR(L),Intron	-0.545946	#N/A	#N/A	#N/A
Kdm5a	9.47576	2	0.0087572	0.22306	3'UTR(M)	0.0248455	#N/A	#N/A	#N/A
Hmgb1	9.47173	2	0.00877487	0.22306	3'UTR(M),5UTR,3'UTR(F)	-0.210189	0.489808	0.00736489	0.980318
Comtd1	9.45062	2	0.00886795	0.224433	3'UTR(M)	-0.0920922	#N/A	#N/A	#N/A
Pet100	6.82745	1	0.00897675	0.226191	3'UTR(M),CDS	-0.0850605	#N/A	#N/A	#N/A
Vwa3a	11.5303	3	0.00917817	0.229839	CDS,Intron	-0.0275132	#N/A	#N/A	#N/A
Tle1	9.3747	2	0.00921108	0.229839	3'UTR(M),Intron	0.1008	1.85714	0.265131	0.983372
Rpap2	6.77554	1	0.00924156	0.229839	3'UTR(F),Intron	-0.134423	#N/A	#N/A	#N/A
Ttc19	11.4884	3	0.00935775	0.230541	3'UTR(M)	-0.0317981	0.807463	0.306963	0.983372
Myh9	6.74382	1	0.0094073	0.230541	3'UTR(M),3'UTR(L),Intron	-0.0903117	0.136865	0.48287	0.983372
Crnkl1	9.33244	2	0.00940778	0.230541	3'UTR(M),CDS,3'UTR(F)	-0.0671028	-1.09345	0.589585	0.983372
Rpl6	6.73946	1	0.0094303	0.230541	CDS,Intron	-0.166953	-0.230129	0.207425	0.983372
Taf15	6.72389	1	0.00951298	0.231568	3'UTR(F),Intron	0.223731	-0.583839	0.399438	0.983372
Stim1	6.71641	1	0.00955295	0.231568	3'UTR(M),3'UTR(L),3'UTR(F)	-0.160941	0.0216416	0.966123	0.997933
C1d	6.69906	1	0.0096464	0.231881	3'UTR(M)	0.0884272	#N/A	#N/A	#N/A
Lmtk3	6.69551	1	0.00966562	0.231881	3'UTR(L),3'UTR(F)	-0.103834	#N/A	#N/A	#N/A
Coro7	9.27396	2	0.00968693	0.231881	3'UTR(M),3'UTR(L)	0.149331	-0.119953	0.742571	0.987949
Zbtb44	6.63277	1	0.0100119	0.23669	3'UTR(M),3'UTR(L),Intron	-0.214287	#N/A	#N/A	#N/A
Mmrn2	6.62998	1	0.0100277	0.23669	3'UTR(M),3'UTR(F)	0.534875	#N/A	#N/A	#N/A
Rbms2	6.62358	1	0.0100637	0.23669	3'UTR(M),3'UTR(F)	-0.451276	#N/A	#N/A	#N/A
Zbtb25	9.19522	2	0.0100759	0.23669	3'UTR(M),Intron,3'UTR(F)	-0.160495	#N/A	#N/A	#N/A
Sik3	6.61827	1	0.0100938	0.23669	3'UTR(M),Intron	0.218697	0.119122	0.741431	0.987949
Prdm2	11.3094	3	0.0101653	0.236799	3'UTR(M),Intron	0.105852	#N/A	#N/A	#N/A
Aasdh	6.60297	1	0.0101809	0.236799	Intron,3'UTR(F)	0.200803	#N/A	#N/A	#N/A
Dram2	11.283	3	0.0102901	0.238373	3'UTR(M),3'UTR(F)	-0.239443	#N/A	#N/A	#N/A
Tbc1d31	6.57271	1	0.0103554	0.23892	3'UTR(F),Intron	0.402478	#N/A	#N/A	#N/A
Mir5119	6.56189	1	0.0104185	0.23892	ncRNA	0.153438	#N/A	#N/A	#N/A
Nelfb	6.54399	1	0.0105239	0.23892	3'UTR(M),3'UTR(L),Intron,3'UTR(F)	-0.194057	-1.31443	0.424365	0.983372
Cep290	6.52537	1	0.0106346	0.23892	3'UTR(M),Intron	0.123194	-1.12246	0.427399	0.983372
Micall1	6.5201	1	0.0106662	0.23892	3'UTR(M),3'UTR(L),Intron	-0.163654	-1.21248	0.655555	0.983372
LOC432842	6.5186	1	0.0106752	0.23892	ncRNA	0.574046	#N/A	#N/A	#N/A
Gnb4	9.07225	2	0.0107148	0.23892	3'UTR(M)	0.0871909	-0.161012	0.841527	0.987949
Tmem120b	9.07104	2	0.0107214	0.23892	3'UTR(M),3'UTR(L),Intron	0.0561818	#N/A	#N/A	#N/A
Pum3	6.49435	1	0.0108218	0.23892	3'UTR(M),3'UTR(F)	-0.193875	#N/A	#N/A	#N/A
Letm2	13.0866	4	0.0108605	0.23892	3'UTR(S),CDS,Intron	-0.251033	#N/A	#N/A	#N/A
Gpr155	6.48669	1	0.0108685	0.23892	3'UTR(L),Intron,3'UTR(F)	-0.132409	#N/A	#N/A	#N/A
Eif2ak1	9.04254	2	0.0108752	0.23892	3'UTR(M),3'UTR(L)	0.041298	#N/A	#N/A	#N/A
Mycl	6.48459	1	0.0108814	0.23892	3'UTR(M),3'UTR(L),3'UTR(F)	-0.173708	#N/A	#N/A	#N/A
Usp48	9.03369	2	0.0109235	0.23892	3'UTR(M),3'UTR(F)	0.0879257	#N/A	#N/A	#N/A
Gpd2	9.03112	2	0.0109375	0.23892	3'UTR(M),CDS,3'UTR(F)	-0.0400515	0.0953909	0.437512	0.983372
Acsl3	9.00845	2	0.0110622	0.239429	3'UTR(M),CDS	-0.0553887	0.0947295	0.818549	0.987949
Crispld1	6.45221	1	0.0110814	0.239429	3'UTR(M),3'UTR(L)	0.45327	#N/A	#N/A	#N/A
Rdh10	9.00418	2	0.0110858	0.239429	3'UTR(M),CDS	0.0934211	#N/A	#N/A	#N/A
Cdc27	8.99543	2	0.0111344	0.239578	3'UTR(M),Intron	0.0924389	#N/A	#N/A	#N/A
Cpne2	6.42636	1	0.0112439	0.240793	3'UTR(M),3'UTR(F),Intron	-0.0646667	#N/A	#N/A	#N/A
D330041H03Rik	6.42149	1	0.0112747	0.240793	ncRNA	0.441326	#N/A	#N/A	#N/A
Fzd2	8.95782	2	0.0113458	0.241412	3'UTR(M),3'UTR(F)	-0.129419	#N/A	#N/A	#N/A
Cox18	6.39248	1	0.0114605	0.242522	3'UTR(M),3'UTR(L),Intron	-0.171877	#N/A	#N/A	#N/A
Fech	8.93389	2	0.0114823	0.242522	3'UTR(M)	0.140536	-0.194535	0.320089	0.983372
Cdon	6.38253	1	0.0115249	0.242529	3'UTR(M),Intron	-0.40823	#N/A	#N/A	#N/A
Rnf20	6.35967	1	0.0116743	0.244777	3'UTR(M),Intron	-0.170995	0.659627	0.59242	0.983372
Cyp2j6	8.88509	2	0.0117659	0.245801	3'UTR(M),3'UTR(L),3'UTR(F)	-0.204699	#N/A	#N/A	#N/A
Gphn	8.85362	2	0.0119525	0.248795	3'UTR(M),Intron	0.0591805	#N/A	#N/A	#N/A
Nrg1	8.84239	2	0.0120199	0.249293	3'UTR(M),3'UTR(L),3'UTR(F)	0.159351	#N/A	#N/A	#N/A
Dtymk	6.29327	1	0.0121197	0.250459	3'UTR(M),Intron	0.274772	0.327545	0.674048	0.983372
Cacna1c	12.8239	4	0.0121692	0.25058	3'UTR(M),3'UTR(L),Intron	0.0463985	1.00692	0.278198	0.983372
Gprin3	10.8859	3	0.0123593	0.253585	3'UTR(M)	-0.065447	#N/A	#N/A	#N/A
Vwa5a	8.76284	2	0.0125076	0.255715	3'UTR(M)	0.232968	0.424239	0.212788	0.983372
Sh2b3	6.2239	1	0.0126037	0.256764	3'UTR(M),Intron	-0.228587	#N/A	#N/A	#N/A
Cyth2	6.21639	1	0.0126573	0.256764	3'UTR(M),3'UTR(L),3'UTR(F)	-0.107295	0.224104	0.593199	0.983372
2810403D21Rik	6.21141	1	0.012693	0.256764	ncRNA	0.599014	#N/A	#N/A	#N/A
Fry	6.18806	1	0.0128615	0.258044	3'UTR(F),Intron	-0.054103	#N/A	#N/A	#N/A
Anapc2	6.18685	1	0.0128703	0.258044	3'UTR(L),CDS	0.107071	#N/A	#N/A	#N/A
Suclg2	6.18163	1	0.0129083	0.258044	3'UTR(M),3'UTR(F)	0.30002	-0.114532	0.74773	0.987949
Golga7	6.17087	1	0.0129871	0.258044	3'UTR(M),Intron	-0.160234	-0.407788	0.53159	0.983372
Nasp	8.6826	2	0.0130196	0.258044	3'UTR(L),Intron,3'UTR(F)	0.198462	#N/A	#N/A	#N/A
Rgs2	6.16561	1	0.0130257	0.258044	3'UTR(M),3'UTR(F)	-0.123831	#N/A	#N/A	#N/A
Araf	6.14168	1	0.0132032	0.260661	3'UTR(M),3'UTR(F),Intron	0.0807577	-0.637096	0.207713	0.983372
Ints14	6.12824	1	0.0133039	0.261205	3'UTR(M),3'UTR(F)	0.32354	#N/A	#N/A	#N/A
Mphosph10	8.63039	2	0.0133639	0.261205	3'UTR(M),3'UTR(L),CDS,3'UTR(F)	0.143486	#N/A	#N/A	#N/A
1700019D03Rik	6.11986	1	0.0133671	0.261205	3'UTR(M),3'UTR(F)	-0.164488	#N/A	#N/A	#N/A
Naif1	6.10512	1	0.0134791	0.261373	3'UTR(M)	-0.353558	#N/A	#N/A	#N/A
Cenpm	8.61299	2	0.0134807	0.261373	3'UTR(M)	0.319636	#N/A	#N/A	#N/A
Slc16a13	6.09601	1	0.0135488	0.261373	3'UTR(M)	0.423129	#N/A	#N/A	#N/A
Dagla	6.09484	1	0.0135577	0.261373	3'UTR(M),3'UTR(L),Intron,3'UTR(F)	-0.0901196	#N/A	#N/A	#N/A
Magi1	10.6674	3	0.0136675	0.262608	3'UTR(M),3'UTR(L),Intron,3'UTR(F)	0.0814863	0.102658	0.873892	0.993444
Tbc1d1	6.04938	1	0.0139111	0.265055	3'UTR(M),Intron	-0.134649	#N/A	#N/A	#N/A
Eif5	8.54666	2	0.0139353	0.265055	3'UTR(M),3'UTR(F),CDS,Intron	-0.100806	#N/A	#N/A	#N/A
Foxq1	6.03909	1	0.0139925	0.265055	3'UTR(M),3'UTR(L)	-0.371597	#N/A	#N/A	#N/A
Bcl7c	8.53055	2	0.014048	0.265055	3'UTR(M),Intron	0.349919	#N/A	#N/A	#N/A
Mpv17l2	6.03168	1	0.0140514	0.265055	3'UTR(M),3'UTR(L),3'UTR(F)	-0.171031	#N/A	#N/A	#N/A
Prex2	10.604	3	0.0140717	0.265055	3'UTR(M),Intron	-0.0900622	#N/A	#N/A	#N/A
Rpusd3	6.01818	1	0.0141592	0.26528	3'UTR(L),3'UTR(F)	0.197297	#N/A	#N/A	#N/A
Armc10	6.01341	1	0.0141976	0.26528	3'UTR(M),CDS	-0.177739	0.142606	0.600068	0.983372
Cdkl3	8.50153	2	0.0142533	0.26528	3'UTR(M),CDS,Intron	-0.133759	#N/A	#N/A	#N/A
Erbin	6.00464	1	0.0142683	0.26528	3'UTR(M),Intron	-0.20915	-0.120173	0.912681	0.99554
Nanp	5.99576	1	0.0143403	0.265285	3'UTR(L),3'UTR(F)	0.30074	1.1827	0.41301	0.983372
Tmod2	5.99322	1	0.014361	0.265285	3'UTR(M)	-0.0893799	-0.0161372	0.895271	0.994478
Glb1	5.98104	1	0.0144605	0.265487	3'UTR(F),Intron	-0.101427	1.03541	0.242854	0.983372
Eif2ak3	5.9757	1	0.0145043	0.265487	3'UTR(M),3'UTR(F),Intron	-0.217605	#N/A	#N/A	#N/A
Tmem160	5.97495	1	0.0145105	0.265487	3'UTR(M),CDS,3'UTR(F)	-0.103549	#N/A	#N/A	#N/A
Rabl3	5.93847	1	0.0148139	0.269954	3'UTR(M),3'UTR(L)	-0.465531	#N/A	#N/A	#N/A
Gm19500	5.93337	1	0.0148568	0.269954	Pseudogene	-0.360119	#N/A	#N/A	#N/A
Crlf2	5.92402	1	0.0149359	0.269954	3'UTR(M),3'UTR(L),3'UTR(F)	-0.150798	#N/A	#N/A	#N/A
A930012L18Rik	5.92322	1	0.0149426	0.269954	ncRNA	-0.600866	#N/A	#N/A	#N/A
Ptprn2	5.9148	1	0.0150142	0.270398	Intron	0.142464	-0.898443	0.058899	0.983372
Zfp995	5.90606	1	0.0150889	0.270661	3'UTR(S),Intron	0.561647	#N/A	#N/A	#N/A
Mtx3	5.89581	1	0.0151769	0.270661	3'UTR(M),3'UTR(L)	-0.230321	#N/A	#N/A	#N/A
B230217O12Rik	5.89339	1	0.0151978	0.270661	ncRNA	-0.283857	#N/A	#N/A	#N/A
Pot1a	8.3652	2	0.0152587	0.270661	3'UTR(M),3'UTR(L)	0.155248	#N/A	#N/A	#N/A
Cpt1a	5.88569	1	0.0152644	0.270661	3'UTR(M),3'UTR(L)	-0.306003	-0.859691	0.221863	0.983372
3110043O21Rik	5.87309	1	0.0153741	0.270987	3'UTR(M),Intron	0.160291	#N/A	#N/A	#N/A
Ints7	8.34974	2	0.0153772	0.270987	3'UTR(M),3'UTR(F)	0.00207537	#N/A	#N/A	#N/A
Zfp280d	5.85009	1	0.0155763	0.273657	3'UTR(M),Intron	0.0985623	#N/A	#N/A	#N/A
Rbm25	10.3457	3	0.0158451	0.27753	CDS	0.0562044	0.48705	0.447029	0.983372
Crk	5.79902	1	0.0160351	0.280005	3'UTR(M)	-0.0836401	-0.0803248	0.711064	0.987949
Rdh5	5.79212	1	0.0160982	0.280254	3'UTR(S),Intron	0.661135	#N/A	#N/A	#N/A
Zswim4	5.78417	1	0.0161711	0.280486	3'UTR(M),3'UTR(L)	0.162051	#N/A	#N/A	#N/A
Adss	5.77636	1	0.0162431	0.280486	3'UTR(M),3'UTR(L)	0.124764	-0.107258	0.684819	0.986399
Riox2	8.23835	2	0.0162579	0.280486	3'UTR(M),Intron	-0.154398	#N/A	#N/A	#N/A
Tmem164	8.20929	2	0.0164959	0.282332	3'UTR(L),Intron	0.13003	#N/A	#N/A	#N/A
Nf1	8.20565	2	0.0165259	0.282332	3'UTR(M),3'UTR(L),Intron	-0.258139	0.4234	0.481751	0.983372
Mink1	5.7386	1	0.016596	0.282332	3'UTR(S),Intron	-0.103598	0.0294347	0.897522	0.994478
Nipsnap2	5.73825	1	0.0165993	0.282332	3'UTR(M),Intron	-0.0891032	0.0818785	0.799004	0.987949
Mknk2	5.72985	1	0.0166789	0.282332	3'UTR(M),3'UTR(L)	-0.170017	#N/A	#N/A	#N/A
C530005A16Rik	5.72932	1	0.0166839	0.282332	ncRNA	-0.43799	#N/A	#N/A	#N/A
Mgat2	5.71841	1	0.016788	0.282332	3'UTR(M),CDS	0.318651	#N/A	#N/A	#N/A
Cspg5	5.71822	1	0.0167898	0.282332	3'UTR(F),Intron	-0.107654	0.112134	0.607324	0.983372
Pdgfc	5.71639	1	0.0168072	0.282332	3'UTR(M),Intron	0.284417	#N/A	#N/A	#N/A
Fbxo36	5.70709	1	0.0168965	0.282513	3'UTR(L),3'UTR(F),Intron	-0.34101	#N/A	#N/A	#N/A
Ccnyl1	8.15895	2	0.0169163	0.282513	3'UTR(M),Intron	-0.0698792	#N/A	#N/A	#N/A
Ptpn3	5.68418	1	0.0171185	0.28451	3'UTR(M),3'UTR(L)	-0.225413	#N/A	#N/A	#N/A
Hnrnpa0	5.6825	1	0.017135	0.28451	3'UTR(M)	-0.0939961	-0.0306255	0.914048	0.99554
Ttc37	10.1629	3	0.0172312	0.285077	3'UTR(M),Intron	-0.171144	#N/A	#N/A	#N/A
Tfam	5.66889	1	0.0172684	0.285077	3'UTR(M)	0.266625	-0.101203	0.632595	0.983372
Hif1a	5.66386	1	0.017318	0.285077	3'UTR(M)	-0.211113	#N/A	#N/A	#N/A
Aldh6a1	5.65872	1	0.0173688	0.285097	3'UTR(L),Intron	-0.107797	-0.574243	0.00367491	0.792709
Tug1	8.07021	2	0.0176838	0.288409	ncRNA	0.0512071	#N/A	#N/A	#N/A
Acvrl1	5.62463	1	0.0177098	0.288409	3'UTR(L),3'UTR(F)	0.313721	#N/A	#N/A	#N/A
Syt11	8.06599	2	0.0177212	0.288409	3'UTR(M)	0.0114156	#N/A	#N/A	#N/A
Ddx56	5.59207	1	0.018042	0.291977	3'UTR(M)	0.121128	#N/A	#N/A	#N/A
2810002D19Rik	5.59206	1	0.0180421	0.291977	ncRNA	0.314283	#N/A	#N/A	#N/A
Trp53inp1	5.58498	1	0.0181151	0.292335	3'UTR(M),3'UTR(L)	-0.178465	#N/A	#N/A	#N/A
Fjx1	5.57662	1	0.0182019	0.292575	3'UTR(M),3'UTR(F)	-0.124703	#N/A	#N/A	#N/A
Map3k12	5.57131	1	0.0182571	0.292575	3'UTR(M)	-0.100835	#N/A	#N/A	#N/A
Zcchc7	5.56413	1	0.0183322	0.292575	3'UTR(F),Intron	-0.123369	#N/A	#N/A	#N/A
Sept11	7.99803	2	0.0183337	0.292575	3'UTR(F),Intron	-0.159618	#N/A	#N/A	#N/A
Letmd1	5.55421	1	0.0184363	0.293397	3'UTR(M),Intron	-0.0882952	0.366539	0.395023	0.983372
Bcr	7.95096	2	0.0187703	0.297147	3'UTR(M),3'UTR(F),Intron	0.0980748	-0.104185	0.748631	0.987949
Tfb1m	7.95042	2	0.0187754	0.297147	3'UTR(M)	-0.0315946	#N/A	#N/A	#N/A
Trim33	5.5154	1	0.0188497	0.297505	3'UTR(M),Intron	0.174481	#N/A	#N/A	#N/A
Ncapd2	5.51037	1	0.0189041	0.297545	3'UTR(M),3'UTR(L),Intron,3'UTR(F)	0.441614	#N/A	#N/A	#N/A
Fip1l1	7.93016	2	0.0189665	0.297713	3'UTR(M),3'UTR(L),3'UTR(F)	0.0155832	0.690403	0.370232	0.983372
Ythdf3	7.92355	2	0.0190293	0.297884	3'UTR(M)	-0.0413783	#N/A	#N/A	#N/A
C230037L18Rik	11.7616	4	0.0192152	0.299619	ncRNA	-0.00989227	#N/A	#N/A	#N/A
Slc2a9	7.89628	2	0.0192906	0.299619	3'UTR(M),3'UTR(L),Intron	-0.0851509	#N/A	#N/A	#N/A
Rnf6	5.46462	1	0.0194053	0.299619	3'UTR(M),3'UTR(F)	-0.156221	#N/A	#N/A	#N/A
Cdh7	5.46071	1	0.0194488	0.299619	3'UTR(L),Intron	0.248003	#N/A	#N/A	#N/A
A930033H14Rik	5.45871	1	0.019471	0.299619	3'UTR(M)	0.358067	#N/A	#N/A	#N/A
Exoc4	7.87203	2	0.0195259	0.299619	3'UTR(M),3'UTR(L),Intron	0.0963568	-0.119669	0.641722	0.983372
Rnf2	5.45338	1	0.0195305	0.299619	3'UTR(M)	-0.0946753	#N/A	#N/A	#N/A
Gm9866	9.88634	3	0.0195574	0.299619	ncRNA	0.149906	#N/A	#N/A	#N/A
B230208B08Rik	5.43989	1	0.0196819	0.300724	ncRNA	0.27123	#N/A	#N/A	#N/A
Hebp2	5.43375	1	0.0197512	0.300983	3'UTR(M),3'UTR(F)	0.351685	#N/A	#N/A	#N/A
Ap1s2	7.83926	2	0.0198485	0.301665	3'UTR(M),3'UTR(L),3'UTR(F)	0.0140145	-2.06666	0.33515	0.983372
Nfatc2	9.83906	3	0.0199849	0.302229	3'UTR(L),Intron	-0.0611866	#N/A	#N/A	#N/A
Srfbp1	7.82497	2	0.0199908	0.302229	3'UTR(M)	-0.0135868	#N/A	#N/A	#N/A
Rab42	5.40402	1	0.0200904	0.302938	3'UTR(L),3'UTR(F)	-0.251059	#N/A	#N/A	#N/A
Garem1	5.3783	1	0.0203888	0.305751	3'UTR(M),3'UTR(L)	-0.130995	#N/A	#N/A	#N/A
Ltn1	9.79251	3	0.0204148	0.305751	3'UTR(M),Intron	-0.0389573	-2.23973	0.0836776	0.983372
Hyi	5.37302	1	0.0204505	0.305751	3'UTR(L),3'UTR(F),Intron	0.178937	#N/A	#N/A	#N/A
Ier5	5.36938	1	0.0204933	0.305751	3'UTR(M),3'UTR(L)	-0.118018	#N/A	#N/A	#N/A
Tsc22d3	5.35974	1	0.0206069	0.305751	3'UTR(M),3'UTR(L)	0.169156	-1.44006	0.0584945	0.983372
Fkbp1a	5.35723	1	0.0206365	0.305751	3'UTR(M),3'UTR(F)	-0.12088	-0.1525	0.199573	0.983372
Tatdn3	5.35613	1	0.0206495	0.305751	3'UTR(M),3'UTR(F)	-0.232961	#N/A	#N/A	#N/A
Bfar	7.75293	2	0.0207239	0.306028	3'UTR(M),Intron	0.0331316	#N/A	#N/A	#N/A
Caln1	5.34559	1	0.0207747	0.306028	3'UTR(M),3'UTR(L)	0.0750165	#N/A	#N/A	#N/A
Pank1	7.7419	2	0.0208385	0.306058	3'UTR(M),3'UTR(L),3'UTR(F)	0.242489	#N/A	#N/A	#N/A
Ranbp10	5.33616	1	0.0208875	0.306058	3'UTR(M),3'UTR(L),Intron	-0.170806	0.0803564	0.951789	0.997933
Cops5	5.33206	1	0.0209366	0.306058	3'UTR(M),Intron,3'UTR(F)	-0.0936654	0.111509	0.584999	0.983372
Ptprz1	9.71321	3	0.0211681	0.308054	3'UTR(M),Intron	-0.0311907	-0.0994508	0.544537	0.983372
Zfp524	7.70693	2	0.0212061	0.308054	3'UTR(M),CDS,Intron	0.14738	#N/A	#N/A	#N/A
2900092D14Rik	5.3015	1	0.0213071	0.308054	ncRNA	-0.129022	#N/A	#N/A	#N/A
Arid4a	9.69515	3	0.0213434	0.308054	3'UTR(M),Intron	-0.0885056	#N/A	#N/A	#N/A
Chd3os	5.29553	1	0.0213802	0.308054	ncRNA	-0.112238	#N/A	#N/A	#N/A
Map3k1	5.29434	1	0.0213948	0.308054	3'UTR(M),3'UTR(L),Intron	-0.468758	0.363473	0.775858	0.987949
Gpalpp1	5.28173	1	0.0215503	0.309516	3'UTR(L),CDS	0.152942	#N/A	#N/A	#N/A
Dcaf8	5.27027	1	0.0216927	0.30995	3'UTR(M)	-0.124145	1.20765	0.317785	0.983372
Apbb3	5.26974	1	0.0216993	0.30995	Intron,3'UTR(F)	0.140702	#N/A	#N/A	#N/A
Ttc26	5.25947	1	0.0218277	0.30995	3'UTR(L),Intron	-0.182976	#N/A	#N/A	#N/A
1810037I17Rik	5.25878	1	0.0218363	0.30995	3'UTR(M),3'UTR(F)	-0.125758	-1.50734	0.207903	0.983372
Agk	5.25362	1	0.0219012	0.30995	3'UTR(M)	-0.192122	-0.545223	0.0801512	0.983372
Arv1	7.64087	2	0.0219183	0.30995	3'UTR(M),3'UTR(F),Intron	-0.218546	#N/A	#N/A	#N/A
Gabarapl2	7.63562	2	0.0219759	0.30995	3'UTR(M)	0.0364262	0.589496	0.177772	0.983372
Afg3l2	7.63232	2	0.0220121	0.30995	3'UTR(M)	0.192572	0.0604302	0.815657	0.987949
Pgap1	7.62433	2	0.0221003	0.310068	3'UTR(M),Intron	-0.215712	#N/A	#N/A	#N/A
Rbl2	5.23566	1	0.0221284	0.310068	3'UTR(L),Intron	-0.109058	-0.210489	0.884435	0.993444
Eml5	7.61394	2	0.0222154	0.310529	3'UTR(M),3'UTR(L),Intron	0.112503	#N/A	#N/A	#N/A
Tspan6	5.21698	1	0.0223674	0.311895	3'UTR(M),3'UTR(L),3'UTR(F)	0.333187	#N/A	#N/A	#N/A
Haus1	5.20428	1	0.0225313	0.31342	3'UTR(M)	0.389946	#N/A	#N/A	#N/A
Ccdc174	7.58086	2	0.0225859	0.313421	3'UTR(M),CDS,Intron	-0.185532	#N/A	#N/A	#N/A
Sox5	5.18612	1	0.022768	0.315185	3'UTR(M),3'UTR(L),3'UTR(F)	0.215129	#N/A	#N/A	#N/A
Pard3	11.3568	4	0.0228336	0.315334	3'UTR(M),3'UTR(L),Intron	0.0381704	#N/A	#N/A	#N/A
Mtdh	9.5413	3	0.022896	0.315438	3'UTR(M),CDS,Intron	-0.0321401	0.163839	0.565312	0.983372
Dhx35	5.1594	1	0.0231209	0.317774	3'UTR(M),3'UTR(F)	0.107677	#N/A	#N/A	#N/A
Zfp111	7.52522	2	0.0232231	0.318181	3'UTR(M)	0.27122	#N/A	#N/A	#N/A
Ube2e2	5.14712	1	0.023285	0.318181	3'UTR(M),Intron	-0.114534	#N/A	#N/A	#N/A
Kcnn3	5.14066	1	0.0233717	0.318181	3'UTR(M)	-0.30063	#N/A	#N/A	#N/A
Hlf	11.302	4	0.023372	0.318181	3'UTR(M)	0.0625872	#N/A	#N/A	#N/A
Efemp2	5.13322	1	0.0234721	0.318658	3'UTR(M),3'UTR(F)	0.157061	#N/A	#N/A	#N/A
Map3k9	7.49998	2	0.023518	0.318658	3'UTR(M),3'UTR(L)	0.162709	#N/A	#N/A	#N/A
Gm14169	5.12378	1	0.0236001	0.3187	ncRNA	-0.295113	#N/A	#N/A	#N/A
Fads3	5.12039	1	0.0236462	0.3187	3'UTR(M),3'UTR(F)	0.100782	#N/A	#N/A	#N/A
Pus10	5.11736	1	0.0236876	0.3187	3'UTR(M),3'UTR(L)	-0.224526	#N/A	#N/A	#N/A
Grm1	5.10162	1	0.0239035	0.320224	3'UTR(M),Intron	0.116846	0.271109	0.621134	0.983372
Nosip	7.46353	2	0.0239506	0.320224	3'UTR(M),3'UTR(F)	-0.132062	5.12106	0.0230729	0.983372
Sos1	7.46207	2	0.023968	0.320224	3'UTR(M),3'UTR(L)	-0.106037	1.55611	0.241945	0.983372
Utp15	5.08713	1	0.0241041	0.321295	3'UTR(M)	0.26352	#N/A	#N/A	#N/A
Prrc2c	7.44292	2	0.0241986	0.321675	3'UTR(M),CDS,Intron	-0.0205664	#N/A	#N/A	#N/A
Zfp697	7.43912	2	0.0242446	0.321675	3'UTR(M),Intron	-0.128919	#N/A	#N/A	#N/A
Hbp1	5.06229	1	0.0244519	0.322847	3'UTR(M),Intron	-0.0453502	#N/A	#N/A	#N/A
Znrf2	11.1934	4	0.0244745	0.322847	3'UTR(M),3'UTR(L)	-0.00678152	#N/A	#N/A	#N/A
Fam208a	7.41804	2	0.0245015	0.322847	3'UTR(M),CDS,Intron	0.0247778	#N/A	#N/A	#N/A
Timm17b	7.40567	2	0.0246535	0.324106	3'UTR(M),3'UTR(F)	-0.162864	1.97438	0.0022036	0.643882
Ddx25	5.03846	1	0.0247905	0.324203	3'UTR(M),3'UTR(L)	0.093136	#N/A	#N/A	#N/A
Malsu1	9.36427	3	0.02482	0.324203	3'UTR(M),CDS,3'UTR(F)	0.111248	#N/A	#N/A	#N/A
2410080I02Rik	5.02836	1	0.0249355	0.324203	ncRNA	-0.490042	#N/A	#N/A	#N/A
Mthfsd	9.34967	3	0.0249855	0.324203	3'UTR(M),3'UTR(L),Intron	0.122293	#N/A	#N/A	#N/A
Lnpk	7.37603	2	0.0250217	0.324203	3'UTR(M)	0.104156	0.0122538	0.962929	0.997933
Ring1	5.02192	1	0.0250283	0.324203	3'UTR(M),3'UTR(F)	0.213898	#N/A	#N/A	#N/A
Pex5l	5.02002	1	0.0250559	0.324203	3'UTR(M),3'UTR(L)	-0.0978253	0.166656	0.700498	0.987949
Gal3st4	5.01381	1	0.0251459	0.324525	3'UTR(S),Intron	-0.160674	#N/A	#N/A	#N/A
Nedd4	5.01052	1	0.0251938	0.324525	3'UTR(M),CDS,3'UTR(F)	-0.078786	0.120775	0.638459	0.983372
Prrc1	4.99017	1	0.0254918	0.326495	3'UTR(M),3'UTR(L),3'UTR(F)	-0.127125	-0.282603	0.730731	0.987949
Pak7	4.98557	1	0.0255596	0.326495	3'UTR(M),3'UTR(F)	-0.144771	#N/A	#N/A	#N/A
Dpf1	7.32858	2	0.0256223	0.326495	3'UTR(M),3'UTR(L),3'UTR(F)	0.0674243	#N/A	#N/A	#N/A
Hmgn3	4.97838	1	0.025666	0.326495	3'UTR(M),CDS	0.0856635	1.96526	0.206673	0.983372
Pcmt1	11.0761	4	0.0257216	0.326495	3'UTR(M),Intron	-0.00591822	-0.244693	0.214394	0.983372
Bcl2l1	4.9743	1	0.0257266	0.326495	Intron	-0.123079	-0.486279	0.224338	0.983372
Siah2	7.31906	2	0.0257446	0.326495	3'UTR(M),Intron,3'UTR(F)	0.20316	#N/A	#N/A	#N/A
Hspa12b	7.31003	2	0.0258611	0.327251	3'UTR(M),3'UTR(F)	0.0300169	-0.443899	0.805285	0.987949
Prr14l	7.30484	2	0.0259284	0.327381	3'UTR(M),3'UTR(L),Intron	-0.160002	#N/A	#N/A	#N/A
Pawr	4.94978	1	0.0260939	0.327569	3'UTR(L),Intron	0.52008	#N/A	#N/A	#N/A
Map9	4.94931	1	0.0261011	0.327569	3'UTR(L),Intron	-0.120248	0.119975	0.837335	0.987949
Vezf1	7.29055	2	0.0261143	0.327569	3'UTR(M)	-0.264323	#N/A	#N/A	#N/A
Rab8a	4.93736	1	0.0262822	0.328957	3'UTR(M)	-0.0708319	1.75502	0.23696	0.983372
Abcb9	4.91509	1	0.0266231	0.332065	3'UTR(S),Intron	0.240271	-0.344155	0.748318	0.987949
Filip1l	4.9127	1	0.02666	0.332065	3'UTR(M),CDS,3'UTR(F)	0.272262	#N/A	#N/A	#N/A
Clmp	4.90985	1	0.0267039	0.332065	3'UTR(M),3'UTR(F)	0.0963483	0.875978	0.554407	0.983372
Gm15860	4.90089	1	0.0268429	0.332922	ncRNA	-0.334367	#N/A	#N/A	#N/A
Gjd3	4.89794	1	0.0268887	0.332922	3'UTR(M),3'UTR(L)	0.517666	#N/A	#N/A	#N/A
Pigf	4.89322	1	0.0269623	0.333115	3'UTR(M),3'UTR(L),Intron,3'UTR(F)	0.121875	#N/A	#N/A	#N/A
Plxnc1	4.8752	1	0.0272452	0.335293	3'UTR(L),Intron	0.22549	-0.621585	0.568699	0.983372
Ndufab1	10.9393	4	0.0272553	0.335293	3'UTR(M),3'UTR(L),Intron	0.268711	-0.0486646	0.845931	0.987949
Nebl	4.86988	1	0.0273294	0.335485	3'UTR(M),Intron	0.0632888	0.278855	0.239584	0.983372
Nek9	4.85933	1	0.0274971	0.336803	3'UTR(M),Intron	0.184263	#N/A	#N/A	#N/A
Abhd10	4.85576	1	0.0275539	0.336803	Intron,3'UTR(F)	0.417088	0.0846587	0.903981	0.99554
Frmd7	4.84226	1	0.0277705	0.338729	3'UTR(L),3'UTR(F)	-0.277545	#N/A	#N/A	#N/A
1110059E24Rik	7.16078	2	0.0278649	0.339161	3'UTR(M),3'UTR(L),Intron	-0.237167	#N/A	#N/A	#N/A
Ahctf1	4.82878	1	0.0279884	0.339944	3'UTR(M),3'UTR(F)	-0.0903571	#N/A	#N/A	#N/A
Trmt13	9.08537	3	0.0281771	0.340839	3'UTR(M),3'UTR(L),Intron	0.0528813	#N/A	#N/A	#N/A
Slc30a6	4.81409	1	0.0282279	0.340839	3'UTR(M),3'UTR(F)	0.158741	#N/A	#N/A	#N/A
Cacul1	7.13403	2	0.0282401	0.340839	3'UTR(M),3'UTR(L)	0.110902	#N/A	#N/A	#N/A
Rps24	4.79936	1	0.0284703	0.342897	3'UTR(M),CDS,3'UTR(F)	-0.104467	-0.0299486	0.905053	0.99554
Ddx50	4.7871	1	0.0286737	0.344356	3'UTR(M),Intron	-0.15013	#N/A	#N/A	#N/A
Zfp24	9.04402	3	0.0287113	0.344356	3'UTR(M),3'UTR(F)	-0.0417861	#N/A	#N/A	#N/A
Senp8	7.08873	2	0.0288869	0.345321	3'UTR(M),Intron	0.108659	#N/A	#N/A	#N/A
Cwc25	4.76986	1	0.0289621	0.345321	3'UTR(L),Intron	0.511737	#N/A	#N/A	#N/A
Npas2	7.08131	2	0.0289944	0.345321	3'UTR(F),Intron	-0.0108515	#N/A	#N/A	#N/A
Cspp1	7.076	2	0.0290714	0.345321	5UTR,3'UTR(M),Intron	0.0592288	#N/A	#N/A	#N/A
Slco1a4	7.07162	2	0.0291351	0.345321	3'UTR(M),3'UTR(L),3'UTR(F)	-0.21991	#N/A	#N/A	#N/A
Zbtb46	7.07043	2	0.0291524	0.345321	3'UTR(M),3'UTR(L),Intron	0.469976	#N/A	#N/A	#N/A
Zmym1	4.75482	1	0.0292164	0.345366	3'UTR(M),CDS,3'UTR(F)	0.211625	#N/A	#N/A	#N/A
Wasf2	4.74142	1	0.0294447	0.346843	CDS,Intron	-0.293122	#N/A	#N/A	#N/A
Fnbp4	7.04811	2	0.0294797	0.346843	3'UTR(M),3'UTR(L),Intron	-0.0684167	#N/A	#N/A	#N/A
Gemin6	7.04432	2	0.0295355	0.346843	3'UTR(M),Intron	0.0904641	#N/A	#N/A	#N/A
Mindy4	4.73338	1	0.0295827	0.346843	3'UTR(M),3'UTR(F),Intron	-0.47258	#N/A	#N/A	#N/A
Rufy3	8.96356	3	0.0297794	0.348292	3'UTR(M),Intron	0.0535465	0.215376	0.584449	0.983372
Abhd13	7.02464	2	0.0298276	0.348292	3'UTR(M)	-0.0378634	#N/A	#N/A	#N/A
Cldnd1	4.71404	1	0.0299172	0.348342	3'UTR(M)	-0.102306	#N/A	#N/A	#N/A
Rxfp1	7.01261	2	0.0300075	0.348342	3'UTR(M),3'UTR(L),Intron	-0.0530152	#N/A	#N/A	#N/A
Chic1	4.70685	1	0.0300426	0.348342	3'UTR(M)	-0.133035	#N/A	#N/A	#N/A
Lrrc57	4.70232	1	0.0301219	0.348342	3'UTR(M)	-0.172017	-0.274761	0.373118	0.983372
Epb41l3	4.69947	1	0.0301719	0.348342	3'UTR(M),3'UTR(F)	0.105656	-0.0523298	0.769479	0.987949
Clcn5	4.69812	1	0.0301957	0.348342	3'UTR(M),3'UTR(L)	-0.203652	#N/A	#N/A	#N/A
Gm3230	4.68923	1	0.0303522	0.348814	ncRNA	0.393838	#N/A	#N/A	#N/A
Bahcc1	4.6889	1	0.0303581	0.348814	3'UTR(M),3'UTR(L),Intron	-0.220096	#N/A	#N/A	#N/A
Syngr2	4.66937	1	0.0307051	0.351634	3'UTR(M),3'UTR(L)	0.195399	#N/A	#N/A	#N/A
Stk17b	4.66821	1	0.0307259	0.351634	3'UTR(M)	0.43591	#N/A	#N/A	#N/A
Celf6	6.95804	2	0.0308376	0.35221	3'UTR(M),3'UTR(F),Intron	-0.0372597	#N/A	#N/A	#N/A
Tmem135	4.65134	1	0.0310294	0.35245	3'UTR(M)	-0.160266	#N/A	#N/A	#N/A
Csf3r	4.65094	1	0.0310366	0.35245	3'UTR(M),Intron	0.173261	#N/A	#N/A	#N/A
Pax6	4.64219	1	0.0311953	0.35245	3'UTR(M)	-0.0971983	#N/A	#N/A	#N/A
Atr	4.64082	1	0.0312202	0.35245	3'UTR(L),3'UTR(F)	-0.269244	#N/A	#N/A	#N/A
Vps53	4.63935	1	0.0312468	0.35245	3'UTR(M),Intron,3'UTR(F)	0.0950802	0.0221772	0.943483	0.997933
Gba	4.63681	1	0.0312932	0.35245	3'UTR(M),3'UTR(F)	-0.131798	#N/A	#N/A	#N/A
Ttc1	6.92837	2	0.0312985	0.35245	3'UTR(M),3'UTR(L),CDS	-0.0452272	0.229838	0.503963	0.983372
Msrb2	4.63247	1	0.0313723	0.35245	3'UTR(S),Intron	-0.110712	0.343809	0.379509	0.983372
Ep400	4.63038	1	0.0314107	0.35245	3'UTR(M),Intron	-0.1824	-2.98005	0.294988	0.983372
Nicn1	4.59936	1	0.031984	0.356657	3'UTR(M),3'UTR(L),3'UTR(F)	-0.0954901	#N/A	#N/A	#N/A
Ccdc159	4.59587	1	0.032049	0.356657	3'UTR(F),Intron	-0.321946	#N/A	#N/A	#N/A
Rragd	6.87777	2	0.0321005	0.356657	3'UTR(M)	0.119392	#N/A	#N/A	#N/A
Csmd1	6.87581	2	0.0321319	0.356657	3'UTR(L),Intron	0.0192163	#N/A	#N/A	#N/A
Glmn	4.58744	1	0.0322071	0.356657	3'UTR(M),3'UTR(L),3'UTR(F)	0.150105	-0.0336311	0.968011	0.997933
A430033K04Rik	6.87066	2	0.0322148	0.356657	3'UTR(M),Intron	-0.177212	#N/A	#N/A	#N/A
Mok	4.58674	1	0.0322202	0.356657	3'UTR(L),3'UTR(F)	-0.317333	#N/A	#N/A	#N/A
Gm11973	8.78082	3	0.0323515	0.357422	ncRNA	0.0676683	#N/A	#N/A	#N/A
Imp4	6.85401	2	0.0324841	0.358051	3'UTR(M)	-0.059412	#N/A	#N/A	#N/A
Nup107	4.57018	1	0.0325331	0.358051	3'UTR(M),Intron	-0.255775	#N/A	#N/A	#N/A
Ptrh2	4.56356	1	0.032659	0.35861	3'UTR(M),3'UTR(F)	-0.20254	-0.403524	0.316937	0.983372
Csnk2a1	6.84022	2	0.0327088	0.35861	3'UTR(M)	0.0244825	-0.115534	0.439409	0.983372
Tmem163	6.82593	2	0.0329434	0.359552	3'UTR(M),3'UTR(F)	0.0752316	-0.0824919	0.855975	0.987949
Gjc3	4.54581	1	0.0329994	0.359552	Intron	0.0683616	-0.809291	0.261296	0.983372
Cep76	6.8224	2	0.0330016	0.359552	3'UTR(M),Intron	-0.133681	#N/A	#N/A	#N/A
March1	8.73398	3	0.033045	0.359552	3'UTR(M),3'UTR(F),Intron	-0.0844302	#N/A	#N/A	#N/A
Rundc3b	4.53909	1	0.0331293	0.359787	3'UTR(L),Intron	-0.11133	#N/A	#N/A	#N/A
AW046200	4.52617	1	0.0333802	0.361184	ncRNA	-0.564545	#N/A	#N/A	#N/A
Pgr	4.526	1	0.0333836	0.361184	3'UTR(F),Intron	0.219585	#N/A	#N/A	#N/A
Cd2bp2	4.51634	1	0.0335726	0.362301	3'UTR(M),3'UTR(F)	0.155056	#N/A	#N/A	#N/A
Ncbp3	4.51429	1	0.0336129	0.362301	3'UTR(M),3'UTR(L),3'UTR(F)	0.200872	#N/A	#N/A	#N/A
Fam221b	4.50557	1	0.0337846	0.362666	3'UTR(S),Intron	0.555302	#N/A	#N/A	#N/A
Med14	6.77342	2	0.0338197	0.362666	3'UTR(M),Intron	-0.135886	#N/A	#N/A	#N/A
Atf7ip	6.77046	2	0.0338699	0.362666	3'UTR(M),3'UTR(F)	0.0422228	#N/A	#N/A	#N/A
Dnajc30	6.76872	2	0.0338994	0.362666	3'UTR(M),3'UTR(F)	-0.143959	#N/A	#N/A	#N/A
Scrn3	4.49394	1	0.0340152	0.363049	3'UTR(F),Intron	0.138101	0.786138	0.1136	0.983372
Gk5	4.49103	1	0.0340731	0.363049	Intron	-0.345102	#N/A	#N/A	#N/A
Glyr1	4.48547	1	0.034184	0.363049	3'UTR(M),3'UTR(L),Intron	-0.0730726	-0.257532	0.840389	0.987949
March7	4.48528	1	0.0341879	0.363049	3'UTR(M),Intron	-0.136477	#N/A	#N/A	#N/A
Exoc2	4.48055	1	0.0342826	0.363383	3'UTR(M),3'UTR(L),Intron	-0.251778	0.186958	0.565441	0.983372
Gstz1	4.46416	1	0.0346131	0.365928	3'UTR(M),Intron	-0.134914	-0.249439	0.363858	0.983372
Erc1	4.45669	1	0.0347647	0.365928	3'UTR(M)	0.179688	0.574565	0.298241	0.983372
Cdk5rap2	8.61964	3	0.0347996	0.365928	3'UTR(M),Intron,CDS,3'UTR(F)	0.117089	0.86972	0.298976	0.983372
Rnf165	8.61711	3	0.0348395	0.365928	3'UTR(M),3'UTR(L),Intron	0.0159459	#N/A	#N/A	#N/A
Stoml2	4.45294	1	0.0348412	0.365928	3'UTR(M),3'UTR(F)	0.074095	-0.103741	0.673626	0.983372
Sspn	4.44778	1	0.0349467	0.366054	3'UTR(M),3'UTR(L)	-0.215302	#N/A	#N/A	#N/A
Mir125b-2	6.70592	2	0.0349807	0.366054	ncRNA	-0.254385	#N/A	#N/A	#N/A
Etv1	4.43294	1	0.0352518	0.368221	3'UTR(M)	0.118417	#N/A	#N/A	#N/A
Glod4	4.4289	1	0.0353354	0.368424	3'UTR(M),3'UTR(F)	-0.112027	-0.107705	0.598029	0.983372
Socs2	4.42402	1	0.0354365	0.368572	3'UTR(M),3'UTR(F)	0.14368	#N/A	#N/A	#N/A
Hibch	4.42203	1	0.0354778	0.368572	3'UTR(M),3'UTR(F)	0.261828	#N/A	#N/A	#N/A
Irs2	4.40263	1	0.0358836	0.371806	3'UTR(M),3'UTR(L),3'UTR(F)	-0.132438	#N/A	#N/A	#N/A
Scyl2	6.653	2	0.0359186	0.371806	3'UTR(M)	-0.0318172	0.0498926	0.897686	0.994478
Cntn6	6.63495	2	0.0362442	0.372018	3'UTR(S),Intron	0.0260673	#N/A	#N/A	#N/A
Senp7	6.63268	2	0.0362854	0.372018	3'UTR(M),3'UTR(F),Intron	-0.0611932	2.15963	0.254029	0.983372
H3f3b	4.38336	1	0.0362913	0.372018	3'UTR(M)	0.0979887	#N/A	#N/A	#N/A
Tbc1d9b	6.63104	2	0.0363152	0.372018	3'UTR(M),Intron	-0.0514422	0.614329	0.540398	0.983372
Tmem206	6.63031	2	0.0363283	0.372018	3'UTR(M),3'UTR(F),Intron	-0.171749	#N/A	#N/A	#N/A
2700054A10Rik	4.37991	1	0.0363649	0.372018	ncRNA	-0.239872	#N/A	#N/A	#N/A
Stx16	4.37863	1	0.0363923	0.372018	3'UTR(M),3'UTR(L),Intron	-0.0881618	#N/A	#N/A	#N/A
Rps17	4.36799	1	0.0366201	0.372971	3'UTR(M),3'UTR(F)	-0.145847	0.185727	0.50781	0.983372
Smcr8	4.36634	1	0.0366557	0.372971	3'UTR(M)	-0.362461	#N/A	#N/A	#N/A
Cct4	4.36098	1	0.0367712	0.372971	3'UTR(L),3'UTR(F)	-0.120582	-0.0205098	0.885618	0.993444
Bet1	4.35314	1	0.0369408	0.372971	3'UTR(M),CDS,3'UTR(F)	0.217649	#N/A	#N/A	#N/A
Eri1	4.35215	1	0.0369623	0.372971	3'UTR(M)	-0.374709	#N/A	#N/A	#N/A
Pggt1b	6.59272	2	0.0370177	0.372971	3'UTR(M)	0.253648	#N/A	#N/A	#N/A
Nr6a1	6.58702	2	0.0371233	0.372971	3'UTR(M),3'UTR(L),Intron	0.0925862	#N/A	#N/A	#N/A
Rab11a	6.58507	2	0.0371595	0.372971	3'UTR(M)	0.0698648	#N/A	#N/A	#N/A
Ago3	6.58243	2	0.0372086	0.372971	3'UTR(M),Intron	0.0399513	-2.12859	0.127418	0.983372
Syn2	6.58177	2	0.037221	0.372971	3'UTR(F),Intron	-0.0529183	-0.13797	0.12756	0.983372
Per3	6.58088	2	0.0372375	0.372971	3'UTR(M),Intron	-0.1194	#N/A	#N/A	#N/A
Usp2	6.57942	2	0.0372647	0.372971	3'UTR(M),3'UTR(F)	0.00992275	#N/A	#N/A	#N/A
Plk2	4.32984	1	0.0374497	0.374018	3'UTR(M),Intron	-0.0580077	#N/A	#N/A	#N/A
Ctdspl2	6.56135	2	0.037603	0.374018	3'UTR(M)	0.068932	#N/A	#N/A	#N/A
Phkg1	8.447	3	0.0376229	0.374018	3'UTR(L),Intron	-0.118409	-0.42607	0.574322	0.983372
Pim1	4.32168	1	0.0376296	0.374018	3'UTR(M),3'UTR(L)	0.383541	#N/A	#N/A	#N/A
Gfer	4.31382	1	0.037804	0.374191	3'UTR(M),3'UTR(F)	0.288357	1.68665	0.0778975	0.983372
Mios	4.31248	1	0.0378338	0.374191	3'UTR(M)	0.105027	#N/A	#N/A	#N/A
Bmpr1a	8.43123	3	0.0378916	0.374191	3'UTR(M)	-0.0759909	-0.554264	0.732407	0.987949
Cnnm2	6.54521	2	0.0379076	0.374191	3'UTR(M),3'UTR(L),3'UTR(F)	0.00118175	-0.331586	0.75571	0.987949
Snrnp200	4.30188	1	0.0380703	0.375153	3'UTR(M),3'UTR(F)	-0.0963769	#N/A	#N/A	#N/A
Tmem106b	4.29736	1	0.0381715	0.375224	3'UTR(M)	0.10522	0.528952	0.534044	0.983372
Iglon5	4.29444	1	0.0382372	0.375224	3'UTR(M),Intron	0.183875	-0.21337	0.788326	0.987949
Tmem56	4.29005	1	0.0383359	0.375224	3'UTR(L),Intron	-0.201103	#N/A	#N/A	#N/A
Vangl2	6.51715	2	0.0384431	0.375224	3'UTR(M),3'UTR(L),3'UTR(F)	-0.0954185	#N/A	#N/A	#N/A
Zfp28	4.28355	1	0.0384828	0.375224	3'UTR(M),3'UTR(F)	-0.575581	#N/A	#N/A	#N/A
Kcnq3	6.51266	2	0.0385296	0.375224	3'UTR(M),3'UTR(L),Intron	-0.0182369	0.172817	0.866561	0.992837
Adat1	8.39302	3	0.0385506	0.375224	3'UTR(M),Intron	0.101987	#N/A	#N/A	#N/A
D030028A08Rik	10.1109	4	0.0386001	0.375224	ncRNA	0.0727497	#N/A	#N/A	#N/A
Ap4m1	4.27536	1	0.0386688	0.375257	3'UTR(M),3'UTR(F)	-0.161429	#N/A	#N/A	#N/A
Pdzd2	4.26972	1	0.0387973	0.375869	3'UTR(L),Intron	-0.256077	#N/A	#N/A	#N/A
8030462N17Rik	4.26641	1	0.0388729	0.375968	3'UTR(L),Intron	0.21052	-2.25143	0.0348336	0.983372
Tmed2	4.26159	1	0.0389835	0.376002	3'UTR(M),3'UTR(F),Intron	-0.0724114	0.271111	0.625655	0.983372
Slc25a18	4.26055	1	0.0390073	0.376002	3'UTR(M),3'UTR(L)	-0.0761392	-0.00831794	0.978875	0.997933
Prpf31	6.47933	2	0.0391769	0.377004	3'UTR(M),Intron	0.124976	0.804776	0.519403	0.983372
ENSMUSG00000084972	6.47166	2	0.0393276	0.377821	Pseudogene	-0.455808	#N/A	#N/A	#N/A
Tln1	4.22232	1	0.0398956	0.381527	3'UTR(M),Intron	0.200018	0.215735	0.585786	0.983372
Snx17	4.21971	1	0.039957	0.381527	3'UTR(M),3'UTR(F)	0.126567	#N/A	#N/A	#N/A
Arhgap35	4.21967	1	0.0399579	0.381527	3'UTR(M)	-0.0736223	#N/A	#N/A	#N/A
Tulp3	4.21878	1	0.039979	0.381527	Intron	0.0651591	#N/A	#N/A	#N/A
Lmtk2	4.21447	1	0.0400807	0.381863	3'UTR(M),3'UTR(L),Intron	-0.141175	#N/A	#N/A	#N/A
Ccdc91	6.41966	2	0.0403634	0.382238	3'UTR(M),Intron	-0.08425	0.360904	0.756675	0.987949
Fam98b	4.20211	1	0.0403738	0.382238	3'UTR(M),CDS	0.109294	0.122237	0.747758	0.987949
ENSMUSG00000087081	4.20147	1	0.0403889	0.382238	Pseudogene	0.229428	#N/A	#N/A	#N/A
Pigv	8.28927	3	0.0403969	0.382238	3'UTR(M),3'UTR(F)	-0.351393	#N/A	#N/A	#N/A
Heatr6	8.2862	3	0.0404527	0.382238	3'UTR(M),3'UTR(F),Intron	-0.00242671	#N/A	#N/A	#N/A
Eif4ebp2	6.40344	2	0.0406921	0.383869	3'UTR(M),Intron	-0.135193	0.418608	0.386344	0.983372
Tanc1	4.18148	1	0.0408681	0.384897	3'UTR(M),Intron	0.129937	1.41577	0.0697109	0.983372
Plin3	4.17247	1	0.0410859	0.386315	3'UTR(M)	-0.200306	0.400119	0.311278	0.983372
Psme3	4.16015	1	0.0413858	0.387509	3'UTR(M),3'UTR(F)	0.151036	0.803907	0.328916	0.983372
Xpo5	8.22759	3	0.041535	0.387509	3'UTR(M),CDS,Intron	0.0217443	0.200323	0.802761	0.987949
Hacd1	4.15313	1	0.0415577	0.387509	3'UTR(M),Intron,3'UTR(F)	-0.130131	#N/A	#N/A	#N/A
Grik2	6.36105	2	0.0415637	0.387509	3'UTR(M),Intron	0.0682837	-0.459112	0.663446	0.983372
Agpat3	6.35303	2	0.0417307	0.387509	3'UTR(M),3'UTR(F)	0.114457	0.449463	0.249998	0.983372
Epc2	6.35061	2	0.0417814	0.387509	3'UTR(M),Intron	-0.0511546	#N/A	#N/A	#N/A
Gla	4.14355	1	0.0417933	0.387509	3'UTR(M),3'UTR(L)	0.165988	5.00974	0.0713646	0.983372
Pkn2	4.14351	1	0.0417944	0.387509	3'UTR(M)	-0.14028	#N/A	#N/A	#N/A
Pdhb	6.34876	2	0.04182	0.387509	3'UTR(M),Intron,CDS,3'UTR(F)	0.0353582	-0.0512183	0.623183	0.983372
Stxbp5l	6.34456	2	0.0419079	0.387699	3'UTR(M),Intron	-0.119701	-0.111578	0.644607	0.983372
Wdcp	6.33949	2	0.0420143	0.388058	3'UTR(M),CDS,3'UTR(F)	0.089578	#N/A	#N/A	#N/A
Ilvbl	4.12232	1	0.042321	0.388371	3'UTR(M),3'UTR(L),3'UTR(F),Intron	0.150958	#N/A	#N/A	#N/A
Lamtor1	4.12222	1	0.0423234	0.388371	3'UTR(M)	0.136557	-0.266845	0.361048	0.983372
Ace	4.12092	1	0.0423561	0.388371	3'UTR(M),3'UTR(L),3'UTR(F)	0.230748	#N/A	#N/A	#N/A
Rab3gap2	6.32284	2	0.0423656	0.388371	3'UTR(M),3'UTR(F)	-0.0694028	-0.160982	0.550351	0.983372
Agap1	6.32186	2	0.0423862	0.388371	3'UTR(M)	0.0585876	#N/A	#N/A	#N/A
Kcnk4	4.11574	1	0.0424861	0.388666	3'UTR(L),Intron,3'UTR(F)	-0.376908	#N/A	#N/A	#N/A
Ccdc138	6.30666	2	0.0427096	0.39009	3'UTR(L),Intron	-0.33111	#N/A	#N/A	#N/A
Ssrp1	4.09872	1	0.0429156	0.391061	3'UTR(M),CDS	-0.10063	0.767197	0.712389	0.987949
Tiam2	6.29534	2	0.0429521	0.391061	3'UTR(M),CDS,Intron	0.169346	0.130277	0.843598	0.987949
Jarid2	6.28131	2	0.0432545	0.393155	3'UTR(M),3'UTR(L)	-0.0400207	#N/A	#N/A	#N/A
Trpm3	8.12336	3	0.0435298	0.393155	3'UTR(M),3'UTR(L),Intron	0.0958137	#N/A	#N/A	#N/A
Slc20a2	4.07348	1	0.0435615	0.393155	3'UTR(M),3'UTR(L),Intron	0.118822	-0.133955	0.76368	0.987949
Rab3gap1	4.07296	1	0.0435748	0.393155	3'UTR(M),3'UTR(L),3'UTR(F)	0.0760436	#N/A	#N/A	#N/A
Gpm6b	4.07112	1	0.0436224	0.393155	3'UTR(M),Intron	-0.0666392	-0.0607437	0.617571	0.983372
Dus4l	4.07106	1	0.043624	0.393155	3'UTR(S),Intron	-0.117261	#N/A	#N/A	#N/A
Wdr37	6.2626	2	0.043661	0.393155	3'UTR(M)	0.124407	0.281103	0.304274	0.983372
Smap1	4.0525	1	0.0441059	0.395603	CDS,Intron	-0.0943222	0.293624	0.18538	0.983372
Zfp930	4.05082	1	0.0441499	0.395603	3'UTR(M),CDS	-0.360647	#N/A	#N/A	#N/A
Daam2	4.04991	1	0.0441737	0.395603	3'UTR(M)	-0.101873	0.207013	0.755245	0.987949
Guf1	8.08894	3	0.0442089	0.395603	3'UTR(M),3'UTR(F),Intron	-0.125639	#N/A	#N/A	#N/A
Ubl3	4.04162	1	0.0443913	0.395603	3'UTR(M),3'UTR(L)	-0.055231	0.344262	0.570286	0.983372
Galt	4.04111	1	0.0444046	0.395603	3'UTR(M),3'UTR(F)	0.17673	#N/A	#N/A	#N/A
Epb41	4.04072	1	0.044415	0.395603	3'UTR(L),Intron	-0.183557	#N/A	#N/A	#N/A
Txndc9	4.03708	1	0.0445108	0.395843	3'UTR(M),3'UTR(F)	0.161106	-0.547928	0.626879	0.983372
Ncor1	8.05788	3	0.0448306	0.39807	3'UTR(M),Intron	-0.00811532	#N/A	#N/A	#N/A
Rwdd3	4.01514	1	0.0450935	0.399787	3'UTR(M),3'UTR(F)	-0.334001	#N/A	#N/A	#N/A
Ccdc127	8.03857	3	0.0452213	0.400303	3'UTR(M),3'UTR(L),Intron	-0.0907351	1.75725	0.205673	0.983372
Wls	8.02808	3	0.0454348	0.401574	3'UTR(M),Intron	0.109405	#N/A	#N/A	#N/A
Rbfox1	6.17748	2	0.0455594	0.402056	5UTR,3'UTR(M)	0.0217059	#N/A	#N/A	#N/A
Lamc3	3.99454	1	0.0456479	0.402219	3'UTR(L),Intron	0.205801	#N/A	#N/A	#N/A
Aig1	3.97924	1	0.0460642	0.402616	3'UTR(L),Intron	-0.0698866	#N/A	#N/A	#N/A
Cdh10	3.97698	1	0.0461263	0.402616	3'UTR(M),3'UTR(L)	-0.32522	#N/A	#N/A	#N/A
Ankfy1	3.97633	1	0.0461441	0.402616	3'UTR(M),3'UTR(L)	-0.170137	0.801671	0.146729	0.983372
Spint2	3.9713	1	0.046282	0.402616	3'UTR(M),Intron	0.198226	#N/A	#N/A	#N/A
Ralgapb	3.96943	1	0.0463333	0.402616	3'UTR(M),Intron	0.133901	#N/A	#N/A	#N/A
Hs3st1	3.96788	1	0.046376	0.402616	3'UTR(M)	-0.113282	#N/A	#N/A	#N/A
Tcf20	6.13751	2	0.046479	0.402616	3'UTR(M),Intron	-0.0883343	#N/A	#N/A	#N/A
Extl2	3.96174	1	0.0465455	0.402616	3'UTR(M),3'UTR(F)	-0.156937	#N/A	#N/A	#N/A
Ankle2	6.13113	2	0.0466274	0.402616	3'UTR(M),3'UTR(F)	-0.0632882	-3.46917	0.203657	0.983372
Akap13	6.13035	2	0.0466457	0.402616	3'UTR(M),Intron	0.0767959	#N/A	#N/A	#N/A
Rspo3	3.95702	1	0.0466764	0.402616	Intron,3'UTR(F)	0.209948	#N/A	#N/A	#N/A
Ntng2	3.95608	1	0.0467023	0.402616	3'UTR(M),Intron	-0.123142	0.386654	0.748789	0.987949
Sdr39u1	3.95606	1	0.0467029	0.402616	3'UTR(M),Intron	-0.144759	#N/A	#N/A	#N/A
Mrps10	3.95396	1	0.0467612	0.402616	3'UTR(M),3'UTR(F),Intron	-0.440348	#N/A	#N/A	#N/A
Mtf1	3.9522	1	0.0468101	0.402616	3'UTR(L),3'UTR(F)	-0.13769	#N/A	#N/A	#N/A
Yipf2	6.11988	2	0.0468905	0.402616	3'UTR(M),3'UTR(F)	-0.0597065	#N/A	#N/A	#N/A
D630045J12Rik	6.11869	2	0.0469185	0.402616	3'UTR(M),Intron	-0.0486336	#N/A	#N/A	#N/A
Dand5	6.11716	2	0.0469544	0.402616	3'UTR(M),3'UTR(L),Intron,3'UTR(F)	0.0127256	#N/A	#N/A	#N/A
Armc9	9.63197	4	0.0471051	0.403289	3'UTR(M),Intron	0.131598	#N/A	#N/A	#N/A
Ylpm1	6.10786	2	0.0471732	0.403289	3'UTR(M),3'UTR(F),Intron	-0.101819	0.147965	0.852638	0.987949
Tm4sf1	3.91805	1	0.0477702	0.40738	3'UTR(M),3'UTR(L)	0.229185	#N/A	#N/A	#N/A
Zdhhc14	3.91723	1	0.0477936	0.40738	3'UTR(F),Intron	-0.100002	#N/A	#N/A	#N/A
Plekhj1	3.90504	1	0.0481416	0.409738	3'UTR(M)	0.166534	#N/A	#N/A	#N/A
Tctn3	6.03853	2	0.0488371	0.414569	3'UTR(M),3'UTR(L)	-0.119875	#N/A	#N/A	#N/A
Tmem110	3.87789	1	0.0489259	0.414569	3'UTR(M)	-0.0597177	#N/A	#N/A	#N/A
Gca	6.03349	2	0.0489604	0.414569	3'UTR(M)	0.0338074	#N/A	#N/A	#N/A
Pcp4l1	3.87425	1	0.0490323	0.414569	3'UTR(M)	-0.0873975	-0.236568	0.441799	0.983372
Slc16a7	6.02902	2	0.04907	0.414569	3'UTR(M),3'UTR(L),Intron	-0.0370642	1.09953	0.296593	0.983372
Chchd5	3.86448	1	0.0493184	0.415599	3'UTR(M),3'UTR(F)	-0.208241	#N/A	#N/A	#N/A
Champ1	3.86387	1	0.0493365	0.415599	3'UTR(M),Intron	0.281089	#N/A	#N/A	#N/A
Traf6	6.00878	2	0.049569	0.416691	3'UTR(M)	-0.039017	#N/A	#N/A	#N/A
Pds5a	7.82963	3	0.0496671	0.416691	3'UTR(M),Intron	0.0132224	-0.0627921	0.956792	0.997933
Ankmy2	3.8479	1	0.0498083	0.416691	3'UTR(M),3'UTR(F)	-0.187891	-0.0142399	0.979501	0.997933
Tbc1d9	3.84751	1	0.04982	0.416691	3'UTR(M)	0.0899925	#N/A	#N/A	#N/A
Sept6	3.84603	1	0.049864	0.416691	3'UTR(M),3'UTR(L)	0.102358	#N/A	#N/A	#N/A
Iba57	3.84325	1	0.0499465	0.416691	3'UTR(M)	0.52621	0.547753	0.476802	0.983372
Unc13b	3.84233	1	0.0499739	0.416691	3'UTR(M),Intron	0.0810272	#N/A	#N/A	#N/A
Msantd3	7.7993	3	0.0503469	0.417971	3'UTR(M),3'UTR(F),Intron	-0.135253	#N/A	#N/A	#N/A
Lnx1	3.82379	1	0.0505298	0.417971	Intron	-0.0859337	#N/A	#N/A	#N/A
Bhlhe22	3.82237	1	0.0505728	0.417971	3'UTR(L),3'UTR(F)	-0.118795	#N/A	#N/A	#N/A
Igsf10	3.82218	1	0.0505783	0.417971	3'UTR(M),3'UTR(F)	0.691421	#N/A	#N/A	#N/A
Mpzl1	3.82186	1	0.050588	0.417971	3'UTR(M),3'UTR(L),Intron	-0.196039	#N/A	#N/A	#N/A
Zfp157	3.82017	1	0.0506392	0.417971	3'UTR(M),Intron	-0.13303	#N/A	#N/A	#N/A
Zscan29	3.81826	1	0.0506969	0.417971	3'UTR(L),Intron	-0.502923	#N/A	#N/A	#N/A
Pigt	5.96329	2	0.0507094	0.417971	3'UTR(M),Intron	0.00711352	#N/A	#N/A	#N/A
Zfp994	3.80997	1	0.0509484	0.418921	3'UTR(M),3'UTR(F)	0.254624	#N/A	#N/A	#N/A
Smurf1	3.80924	1	0.0509705	0.418921	3'UTR(M),Intron	-0.18266	#N/A	#N/A	#N/A
Rnf128	3.80274	1	0.0511689	0.41995	3'UTR(M),3'UTR(F)	-0.13665	#N/A	#N/A	#N/A
Pafah1b2	3.79727	1	0.0513362	0.420141	3'UTR(M)	-0.0560518	-0.281937	0.115826	0.983372
Adamts1	3.7972	1	0.0513384	0.420141	3'UTR(M)	-0.145385	#N/A	#N/A	#N/A
Tcp11l1	3.79109	1	0.0515262	0.420363	3'UTR(M),Intron	0.0768406	#N/A	#N/A	#N/A
Immp2l	5.92671	2	0.0516453	0.420363	3'UTR(L),3'UTR(F),Intron	-0.0642082	#N/A	#N/A	#N/A
AU041133	3.78551	1	0.0516981	0.420363	3'UTR(M),CDS	-0.2626	#N/A	#N/A	#N/A
Cnep1r1	3.78463	1	0.0517253	0.420363	3'UTR(M)	-0.152034	#N/A	#N/A	#N/A
Adal	3.78061	1	0.0518496	0.420363	3'UTR(M)	-0.170743	0.772651	0.515043	0.983372
Sned1	5.91819	2	0.0518657	0.420363	3'UTR(M),Intron	0.169619	#N/A	#N/A	#N/A
Zmynd19	5.91773	2	0.0518777	0.420363	3'UTR(M),3'UTR(F)	-0.012782	#N/A	#N/A	#N/A
Tmem203	3.77191	1	0.0521202	0.421466	3'UTR(M),3'UTR(F)	0.144197	#N/A	#N/A	#N/A
Airn	3.77061	1	0.0521606	0.421466	ncRNA	-0.196771	#N/A	#N/A	#N/A
Cacna2d1	5.90175	2	0.052294	0.421885	3'UTR(M),3'UTR(F),Intron	-0.011055	-0.144529	0.401488	0.983372
Pak2	7.71179	3	0.0523592	0.421885	3'UTR(M),Intron	-0.0819721	#N/A	#N/A	#N/A
Anxa4	7.7015	3	0.0526009	0.423239	3'UTR(M),3'UTR(L),Intron	0.00559581	0.754807	0.473685	0.983372
Kcnk9	5.88533	2	0.0527251	0.423605	3'UTR(M),3'UTR(L),3'UTR(F)	0.198348	#N/A	#N/A	#N/A
Hdac9	5.8782	2	0.0529134	0.423605	3'UTR(L),Intron	0.187965	#N/A	#N/A	#N/A
Gys1	5.87735	2	0.0529358	0.423605	3'UTR(M),Intron	-0.0778071	0.579043	0.35371	0.983372
Poc5	3.73963	1	0.0531362	0.423605	3'UTR(M),3'UTR(F)	0.14141	#N/A	#N/A	#N/A
Stam	3.73956	1	0.0531383	0.423605	3'UTR(M)	-0.161664	0.433133	0.204806	0.983372
Wars2	5.86932	2	0.0531488	0.423605	3'UTR(M),Intron	-0.0159054	-0.0461769	0.960005	0.997933
Ppm1d	5.8688	2	0.0531626	0.423605	3'UTR(M),3'UTR(F),Intron	0.119284	#N/A	#N/A	#N/A
Cep44	3.73535	1	0.0532726	0.42361	3'UTR(M),Intron,3'UTR(F)	-0.19741	#N/A	#N/A	#N/A
4933421O10Rik	5.86324	2	0.0533107	0.42361	ncRNA	-0.183269	#N/A	#N/A	#N/A
Gpr107	7.66674	3	0.0534254	0.423935	3'UTR(M),3'UTR(F),Intron	-0.111559	#N/A	#N/A	#N/A
Cep68	5.85078	2	0.0536437	0.42508	3'UTR(M),Intron	0.0404624	#N/A	#N/A	#N/A
Desi2	5.84151	2	0.053893	0.426467	3'UTR(M),3'UTR(F),Intron	-0.0291093	#N/A	#N/A	#N/A
Cdk19	5.83529	2	0.0540608	0.426757	5UTR,3'UTR(L),3'UTR(M)	0.140799	#N/A	#N/A	#N/A
Thap1	5.83252	2	0.0541357	0.426757	3'UTR(M),3'UTR(F),Intron	0.0897063	#N/A	#N/A	#N/A
Kdm4c	3.70799	1	0.0541524	0.426757	3'UTR(M),Intron	0.0656475	#N/A	#N/A	#N/A
Acsl6	3.70214	1	0.0543427	0.42722	3'UTR(L),3'UTR(F)	0.0786805	0.0300286	0.887962	0.993444
6030458C11Rik	5.82206	2	0.0544195	0.42722	3'UTR(M),Intron	0.150799	#N/A	#N/A	#N/A
Vps4b	3.69933	1	0.0544343	0.42722	3'UTR(M),3'UTR(L)	0.162354	1.11459	0.183373	0.983372
Golga1	3.6856	1	0.0548844	0.429453	3'UTR(M)	-0.124378	-0.434865	0.776949	0.987949
Dnajc11	3.68532	1	0.0548933	0.429453	3'UTR(M)	0.15309	#N/A	#N/A	#N/A
Dcbld2	5.80035	2	0.0550137	0.429453	3'UTR(M),Intron	0.125913	#N/A	#N/A	#N/A
Fbxw2	3.68154	1	0.0550179	0.429453	3'UTR(M),Intron	-0.0774272	#N/A	#N/A	#N/A
Huwe1	7.58543	3	0.0554035	0.431163	3'UTR(M),3'UTR(L),CDS,3'UTR(F)	-0.0766767	-0.148272	0.708781	0.987949
Lrrfip2	7.58072	3	0.0555202	0.431163	3'UTR(M),3'UTR(L),3'UTR(F),Intron	-0.00410862	0.432402	0.63326	0.983372
Supt5	3.66596	1	0.0555348	0.431163	3'UTR(L),CDS	-0.142618	0.367245	0.597779	0.983372
Papolg	3.66589	1	0.0555371	0.431163	3'UTR(M)	0.461614	#N/A	#N/A	#N/A
Fstl4	5.77329	2	0.055763	0.431839	3'UTR(M),Intron	0.0490141	#N/A	#N/A	#N/A
Bub3	3.65878	1	0.0557745	0.431839	3'UTR(M),3'UTR(F)	0.216957	1.02888	0.0173039	0.983372
Ccdc39	5.76607	2	0.0559646	0.432163	3'UTR(M),3'UTR(L)	-0.0884746	#N/A	#N/A	#N/A
Vps13a	3.65132	1	0.0560247	0.432163	3'UTR(L),Intron	0.0968606	#N/A	#N/A	#N/A
Tmem117	3.65081	1	0.0560421	0.432163	3'UTR(L),Intron	-0.36693	#N/A	#N/A	#N/A
Lca5	3.64834	1	0.056125	0.432223	3'UTR(S),Intron	-0.236665	#N/A	#N/A	#N/A
5830417I10Rik	3.63429	1	0.0566008	0.433556	Pseudogene	0.184127	#N/A	#N/A	#N/A
Slc7a7	3.62969	1	0.0567575	0.433556	3'UTR(S),Intron	-0.385802	#N/A	#N/A	#N/A
Dclre1b	3.62921	1	0.0567739	0.433556	3'UTR(M),3'UTR(L),3'UTR(F)	-0.170811	#N/A	#N/A	#N/A
Gm4285	3.62855	1	0.0567964	0.433556	ncRNA	-0.260764	#N/A	#N/A	#N/A
Dpp10	3.62832	1	0.0568042	0.433556	3'UTR(M)	-0.224991	#N/A	#N/A	#N/A
Fam193a	10.7384	5	0.0568204	0.433556	3'UTR(M),3'UTR(L),CDS,Intron	0.0328048	#N/A	#N/A	#N/A
Micu1	3.62407	1	0.0569493	0.433556	3'UTR(F),Intron	-0.0919625	0.599362	0.0851663	0.983372
Arhgef28	7.52128	3	0.0570141	0.433556	3'UTR(M),Intron	-0.0337798	1.61522	0.191152	0.983372
Ash1l	5.72843	2	0.0570278	0.433556	3'UTR(M),CDS	0.0395331	#N/A	#N/A	#N/A
Ttc4	3.62105	1	0.0570528	0.433556	3'UTR(M),3'UTR(L)	-0.101486	#N/A	#N/A	#N/A
Arhgap18	3.616	1	0.0572264	0.434301	3'UTR(M),3'UTR(L),Intron	0.38141	#N/A	#N/A	#N/A
Ercc8	5.71757	2	0.0573383	0.434345	3'UTR(M),3'UTR(F)	-0.0387729	#N/A	#N/A	#N/A
Snx7	3.61144	1	0.0573835	0.434345	3'UTR(M),3'UTR(L),Intron	-0.324721	-2.72341	0.160715	0.983372
Rabgap1	3.60664	1	0.0575492	0.434618	3'UTR(M),Intron	-0.129616	#N/A	#N/A	#N/A
Cast	3.60602	1	0.0575708	0.434618	3'UTR(M),3'UTR(L),Intron	-0.298261	0.374483	0.695009	0.987949
Hs6st2	3.59535	1	0.0579415	0.43614	3'UTR(M),3'UTR(L)	-0.156812	#N/A	#N/A	#N/A
Pde7a	5.69418	2	0.0580129	0.43614	3'UTR(M),3'UTR(F)	-0.0841325	#N/A	#N/A	#N/A
Bbs1	3.59074	1	0.0581022	0.43614	3'UTR(M),3'UTR(L)	-0.253166	#N/A	#N/A	#N/A
Ttll7	3.58935	1	0.0581508	0.43614	3'UTR(M)	0.0522755	#N/A	#N/A	#N/A
Ppat	5.68311	2	0.0583349	0.43614	3'UTR(M),CDS,3'UTR(F)	-0.0852549	#N/A	#N/A	#N/A
Mecr	3.58333	1	0.0583619	0.43614	3'UTR(M),3'UTR(F),Intron	0.297784	0.350906	0.400667	0.983372
Calm1	5.67959	2	0.0584377	0.43614	3'UTR(M),CDS	0.0558341	-0.0766099	0.46162	0.983372
D16Ertd472e	3.58103	1	0.0584429	0.43614	3'UTR(M),3'UTR(L)	-0.252309	#N/A	#N/A	#N/A
Cmtr2	3.58067	1	0.0584556	0.43614	3'UTR(M),3'UTR(L)	0.301375	#N/A	#N/A	#N/A
Kif5c	3.57699	1	0.0585851	0.436539	3'UTR(M),CDS	-0.067083	0.0607326	0.746266	0.987949
Ggnbp1	3.56582	1	0.0589807	0.437379	3'UTR(F),Intron	0.283466	#N/A	#N/A	#N/A
Eml6	3.56449	1	0.0590279	0.437379	3'UTR(M),Intron	0.128726	#N/A	#N/A	#N/A
Acvr1	3.56178	1	0.0591242	0.437379	3'UTR(M),3'UTR(L),Intron	-0.100416	#N/A	#N/A	#N/A
Ythdf2	5.65358	2	0.0592027	0.437379	3'UTR(M),3'UTR(F)	-0.115286	0.466946	0.326092	0.983372
2310035C23Rik	3.55841	1	0.0592445	0.437379	3'UTR(M),Intron	0.0816723	#N/A	#N/A	#N/A
Il18bp	3.5563	1	0.0593198	0.437379	3'UTR(M)	-0.68043	#N/A	#N/A	#N/A
Serpinb1a	3.55559	1	0.0593451	0.437379	3'UTR(M),3'UTR(L),3'UTR(F)	-0.209473	0.262245	0.513084	0.983372
Mpped2	3.55404	1	0.0594005	0.437379	3'UTR(M),3'UTR(F)	-0.172013	#N/A	#N/A	#N/A
Creg1	3.55355	1	0.0594183	0.437379	3'UTR(M),3'UTR(L),3'UTR(F)	-0.133265	#N/A	#N/A	#N/A
Rnf166	3.55241	1	0.0594592	0.437379	3'UTR(M)	-0.136264	#N/A	#N/A	#N/A
4933406I18Rik	3.54787	1	0.0596219	0.438015	ncRNA	-0.279762	#N/A	#N/A	#N/A
Scaf4	5.63687	2	0.0596994	0.438025	3'UTR(L),Intron,3'UTR(F)	0.00670121	#N/A	#N/A	#N/A
Scrg1	3.53226	1	0.0601857	0.441029	3'UTR(M),3'UTR(L),3'UTR(F)	0.142503	0.193311	0.749159	0.987949
Cfap36	3.52507	1	0.0604474	0.442383	3'UTR(M),CDS	-0.0600857	0.130146	0.827321	0.987949
Ank	3.51371	1	0.0608631	0.444591	3'UTR(M),Intron	-0.0461849	#N/A	#N/A	#N/A
Rab1a	3.5126	1	0.060904	0.444591	3'UTR(M)	-0.0829161	0.519504	0.107127	0.983372
4930570G19Rik	7.36065	3	0.0612491	0.446385	ncRNA	-0.137106	#N/A	#N/A	#N/A
Ggcx	5.58378	2	0.0613051	0.446385	3'UTR(M),3'UTR(F)	0.0839688	#N/A	#N/A	#N/A
2610008E11Rik	3.4957	1	0.0615284	0.447444	3'UTR(M)	0.243432	#N/A	#N/A	#N/A
Prmt1	5.56425	2	0.0619069	0.449627	3'UTR(M),3'UTR(L),Intron	0.120574	0.157655	0.552537	0.983372
Ndc1	3.47482	1	0.0623093	0.451979	3'UTR(M),3'UTR(L),3'UTR(F)	-0.170621	#N/A	#N/A	#N/A
Rel	3.46424	1	0.0627092	0.452754	3'UTR(L),Intron	-0.383282	#N/A	#N/A	#N/A
Apobec3	3.46285	1	0.062762	0.452754	3'UTR(M)	0.0745478	#N/A	#N/A	#N/A
Phyhd1	3.4595	1	0.0628894	0.452754	3'UTR(S),Intron	-0.116894	#N/A	#N/A	#N/A
Ndufs1	3.45806	1	0.062944	0.452754	3'UTR(M),Intron	-0.0960073	#N/A	#N/A	#N/A
Mrpl23	3.45462	1	0.0630752	0.452754	3'UTR(F),Intron	-0.2218	0.466278	0.428032	0.983372
9330160F10Rik	3.45408	1	0.0630958	0.452754	ncRNA	0.179954	#N/A	#N/A	#N/A
Prmt6	3.45105	1	0.0632117	0.452754	Intron	-0.355152	#N/A	#N/A	#N/A
Anapc10	3.45066	1	0.0632265	0.452754	3'UTR(M),3'UTR(F),Intron	0.200538	#N/A	#N/A	#N/A
Mrpl16	5.51623	2	0.0634112	0.452754	3'UTR(M),3'UTR(L),CDS	0.117009	0.239108	0.649773	0.983372
Gipr	3.44537	1	0.0634294	0.452754	3'UTR(M)	-0.469083	#N/A	#N/A	#N/A
Dmrta2	5.51555	2	0.0634328	0.452754	3'UTR(M),3'UTR(F)	0.450252	#N/A	#N/A	#N/A
Dtx3	3.44523	1	0.0634345	0.452754	3'UTR(M),3'UTR(L),Intron	0.0856307	0.24927	0.631356	0.983372
Csgalnact1	3.44167	1	0.0635715	0.452754	3'UTR(M),3'UTR(L),Intron	-0.28684	#N/A	#N/A	#N/A
4632415L05Rik	7.27464	3	0.0636407	0.452754	Pseudogene	0.102025	#N/A	#N/A	#N/A
Slc25a35	5.50743	2	0.0636908	0.452754	3'UTR(M),3'UTR(L)	0.05893	#N/A	#N/A	#N/A
Zfp13	3.43358	1	0.0638833	0.452754	3'UTR(M),3'UTR(F)	0.0921929	#N/A	#N/A	#N/A
Med15	3.43238	1	0.0639299	0.452754	3'UTR(M)	-0.105587	#N/A	#N/A	#N/A
Rpl7l1	5.49906	2	0.063958	0.452754	3'UTR(M)	-0.0132726	#N/A	#N/A	#N/A
Clasp2	3.43122	1	0.0639747	0.452754	3'UTR(M)	0.0796561	0.250218	0.356356	0.983372
Usp39	3.43077	1	0.0639924	0.452754	3'UTR(M),Intron	0.197162	-2.66376	0.139674	0.983372
Brwd3	5.4903	2	0.0642386	0.453857	3'UTR(M),Intron	0.0926346	#N/A	#N/A	#N/A
Gnai3	3.41953	1	0.0644293	0.453857	3'UTR(M),Intron	-0.172229	1.57345	0.262606	0.983372
Riok2	5.4832	2	0.0644672	0.453857	3'UTR(M),CDS,Intron	-0.203538	#N/A	#N/A	#N/A
Kcnq5	5.48139	2	0.0645255	0.453857	3'UTR(M),3'UTR(L),Intron	0.159319	#N/A	#N/A	#N/A
Nus1	5.47886	2	0.0646071	0.453857	3'UTR(M),3'UTR(L)	-0.153055	#N/A	#N/A	#N/A
Bag4	5.47839	2	0.0646223	0.453857	3'UTR(M),CDS	-0.103236	0.0552531	0.882044	0.993444
Odc1	3.40697	1	0.0649217	0.454787	3'UTR(M),3'UTR(F)	0.0997656	#N/A	#N/A	#N/A
Gpr83	3.40611	1	0.0649554	0.454787	3'UTR(L),3'UTR(F)	-0.14558	#N/A	#N/A	#N/A
Pcif1	7.22741	3	0.0649921	0.454787	3'UTR(M),3'UTR(L),3'UTR(F),Intron	-0.00447196	#N/A	#N/A	#N/A
Bclaf3	3.40277	1	0.065087	0.454896	3'UTR(M),Intron	0.297227	#N/A	#N/A	#N/A
Ppp2r3a	5.44873	2	0.065588	0.457336	3'UTR(M)	0.0412337	#N/A	#N/A	#N/A
Abcg1	3.38737	1	0.0656978	0.457336	3'UTR(M)	-0.102396	#N/A	#N/A	#N/A
Nudcd1	5.44262	2	0.0657884	0.457336	3'UTR(M),3'UTR(L)	-0.104085	0.380453	0.558627	0.983372
Uso1	3.38496	1	0.0657937	0.457336	3'UTR(M),Intron	-0.0558822	0.136028	0.618432	0.983372
B4galt7	3.38121	1	0.0659435	0.457336	3'UTR(M),3'UTR(F)	0.268592	#N/A	#N/A	#N/A
Myh10	3.37923	1	0.0660229	0.457336	3'UTR(M),Intron	-0.0724264	-0.163645	0.423364	0.983372
Mpp3	5.43435	2	0.0660611	0.457336	3'UTR(M),3'UTR(L)	-0.087811	0.708105	0.0238637	0.983372
Kiss1r	3.37652	1	0.0661314	0.457336	3'UTR(M),Intron	0.363114	#N/A	#N/A	#N/A
Slc30a10	3.376	1	0.0661525	0.457336	3'UTR(M),3'UTR(L)	0.133914	#N/A	#N/A	#N/A
Eloc	3.36925	1	0.0664241	0.458577	3'UTR(M)	-0.0866167	0.354968	0.167593	0.983372
Atmin	3.36757	1	0.0664917	0.458577	3'UTR(M),3'UTR(F)	-0.159219	#N/A	#N/A	#N/A
Bbip1	5.41079	2	0.0668438	0.45973	3'UTR(M),Intron,3'UTR(F)	-0.0857179	#N/A	#N/A	#N/A
Snu13	5.41031	2	0.06686	0.45973	3'UTR(M),3'UTR(L),3'UTR(F)	0.0623376	0.269037	0.522061	0.983372
Magi3	3.35359	1	0.0670585	0.45973	3'UTR(M),3'UTR(F)	-0.342857	-0.0354968	0.972264	0.997933
Hs6st3	3.3515	1	0.0671439	0.45973	Intron	-0.0739361	#N/A	#N/A	#N/A
Cnnm3	3.3508	1	0.0671722	0.45973	3'UTR(M)	0.0951779	2.38894	0.126036	0.983372
Nubp1	5.39803	2	0.0672718	0.45973	3'UTR(M),3'UTR(L),3'UTR(F)	-0.231834	#N/A	#N/A	#N/A
Ago1	5.39784	2	0.067278	0.45973	3'UTR(M),3'UTR(L)	-0.103976	#N/A	#N/A	#N/A
Ebag9	3.34463	1	0.0674245	0.45973	3'UTR(M)	0.251624	-1.25344	0.586958	0.983372
Nhlrc2	5.39158	2	0.067489	0.45973	3'UTR(M),3'UTR(L)	-0.045654	0.568515	0.622926	0.983372
Trappc12	3.34113	1	0.0675682	0.45973	3'UTR(M)	0.0958549	0.814849	0.189138	0.983372
Plekhm3	5.38647	2	0.0676616	0.45973	3'UTR(M),Intron	-0.272621	#N/A	#N/A	#N/A
Azi2	7.13537	3	0.0677061	0.45973	CDS,Intron	-0.0898356	#N/A	#N/A	#N/A
Brf1	3.33398	1	0.0678625	0.45973	3'UTR(M),3'UTR(F)	-0.170415	#N/A	#N/A	#N/A
Gatc	3.33333	1	0.0678895	0.45973	3'UTR(M),3'UTR(L)	-0.116066	#N/A	#N/A	#N/A
Snupn	3.33061	1	0.0680018	0.45973	3'UTR(M),3'UTR(F)	0.278234	#N/A	#N/A	#N/A
Cmss1	3.33019	1	0.068019	0.45973	3'UTR(L),Intron,3'UTR(F)	-0.291855	#N/A	#N/A	#N/A
Fat3	3.33019	1	0.0680192	0.45973	3'UTR(M),Intron	0.0820166	#N/A	#N/A	#N/A
Ddx21	5.37023	2	0.0682135	0.460501	3'UTR(M),CDS	-0.102261	1.04029	0.505631	0.983372
Tenm4	3.32169	1	0.0683715	0.461026	3'UTR(M),3'UTR(L)	-0.0630909	0.744605	0.295733	0.983372
Zmiz1	5.36199	2	0.0684948	0.461316	3'UTR(M),3'UTR(L),Intron	0.00252168	#N/A	#N/A	#N/A
Rtn1	3.30928	1	0.0688896	0.463432	3'UTR(M)	-0.0570883	-0.00314194	0.984263	0.997933
Dnajb14	7.08007	3	0.0693888	0.465955	3'UTR(M),Intron	0.00440188	-1.66809	0.101171	0.983372
Me2	7.07884	3	0.0694269	0.465955	3'UTR(M),3'UTR(L),3'UTR(F)	-0.0999495	0.379259	0.326467	0.983372
Ube2l3	7.07578	3	0.0695213	0.466045	3'UTR(M),3'UTR(L),3'UTR(F)	0.0871412	-0.400214	0.150841	0.983372
Drp2	5.32971	2	0.0696094	0.466091	3'UTR(M),3'UTR(F)	0.165085	#N/A	#N/A	#N/A
Rrp9	3.28887	1	0.0697509	0.466447	3'UTR(S),Intron	0.203819	#N/A	#N/A	#N/A
Mtpn	3.28713	1	0.069825	0.466447	3'UTR(M)	-0.0997659	-0.129971	0.362882	0.983372
Nkd1	3.28493	1	0.0699185	0.466484	3'UTR(M),3'UTR(F)	-0.148034	#N/A	#N/A	#N/A
Srsf1	3.28319	1	0.0699929	0.466484	3'UTR(M)	-0.0783133	0.219128	0.231796	0.983372
Htr6	5.31336	2	0.0701809	0.466806	3'UTR(M),Intron,3'UTR(F)	-0.0747758	#N/A	#N/A	#N/A
Cops2	3.27825	1	0.0702037	0.466806	3'UTR(M)	-0.068798	-0.163396	0.582431	0.983372
Dmxl1	3.27549	1	0.0703219	0.467051	3'UTR(M),3'UTR(L)	0.0958276	#N/A	#N/A	#N/A
Hecw2	7.04594	3	0.0704479	0.467118	3'UTR(M),3'UTR(L),Intron	0.0305127	#N/A	#N/A	#N/A
Idnk	3.27142	1	0.0704964	0.467118	3'UTR(M),3'UTR(F)	0.148333	#N/A	#N/A	#N/A
Jakmip3	3.26958	1	0.0705759	0.467118	3'UTR(L),Intron	-0.160455	-1.46167	0.329708	0.983372
Fbxo45	3.26284	1	0.0708663	0.468501	3'UTR(M),3'UTR(L)	-0.173352	#N/A	#N/A	#N/A
Atcay	3.25989	1	0.070994	0.468532	3'UTR(M)	-0.044132	-0.249141	0.220354	0.983372
Pcmtd2	3.25896	1	0.0710342	0.468532	3'UTR(M),Intron	0.13007	#N/A	#N/A	#N/A
Ccdc50	5.28498	2	0.0711837	0.468743	3'UTR(M),Intron	-0.0371649	#N/A	#N/A	#N/A
Golga3	3.25446	1	0.0712293	0.468743	3'UTR(M),CDS	-0.161853	#N/A	#N/A	#N/A
Mxd4	3.25052	1	0.0714007	0.469333	3'UTR(M),3'UTR(L)	-0.0970119	#N/A	#N/A	#N/A
Adgrf5	5.27536	2	0.0715272	0.46934	3'UTR(M),3'UTR(L),Intron	0.0611078	#N/A	#N/A	#N/A
Thrap3	7.01046	3	0.0715652	0.46934	3'UTR(M),Intron,CDS,3'UTR(F)	-0.102074	#N/A	#N/A	#N/A
Kpna1	5.26593	2	0.0718652	0.470003	3'UTR(M),3'UTR(L)	0.0893673	1.13715	0.187623	0.983372
Arid1a	3.23929	1	0.0718919	0.470003	3'UTR(M),3'UTR(L)	-0.110101	0.628655	0.574348	0.983372
Mir8102	3.23884	1	0.0719117	0.470003	ncRNA	0.253801	#N/A	#N/A	#N/A
Samd5	3.23501	1	0.0720799	0.470096	3'UTR(M)	-0.107566	#N/A	#N/A	#N/A
Casc4	3.23201	1	0.0722119	0.470096	3'UTR(M),CDS	0.160741	#N/A	#N/A	#N/A
Mlst8	3.23053	1	0.0722774	0.470096	3'UTR(M),3'UTR(L)	0.208512	0.169497	0.808993	0.987949
Rccd1	3.23	1	0.0723006	0.470096	3'UTR(M),3'UTR(L)	0.112473	#N/A	#N/A	#N/A
Ehd1	3.22899	1	0.0723451	0.470096	3'UTR(M),CDS,3'UTR(F)	0.0950314	0.14682	0.578456	0.983372
Plekha3	3.22737	1	0.0724169	0.470096	3'UTR(M),CDS	-0.101621	#N/A	#N/A	#N/A
Lsm12	3.2207	1	0.0727126	0.471113	3'UTR(M),3'UTR(F)	-0.0877306	#N/A	#N/A	#N/A
Colgalt2	5.23736	2	0.0728992	0.471113	3'UTR(M),3'UTR(L)	0.00207115	#N/A	#N/A	#N/A
Pakap	3.21642	1	0.0729029	0.471113	Intron	0.0456393	#N/A	#N/A	#N/A
Mccc2	3.21465	1	0.072982	0.471113	3'UTR(M),3'UTR(L)	0.121888	0.049314	0.913353	0.99554
Med13l	3.21461	1	0.0729835	0.471113	3'UTR(M)	-0.0881972	#N/A	#N/A	#N/A
Cd3eap	5.22262	2	0.0734384	0.473517	3'UTR(M),3'UTR(L),3'UTR(F)	-0.0237468	#N/A	#N/A	#N/A
4933431E20Rik	5.21463	2	0.0737322	0.474878	ncRNA	-0.0321334	#N/A	#N/A	#N/A
Uhrf1bp1l	3.19257	1	0.0739738	0.475617	3'UTR(M),3'UTR(F)	-0.127051	0.482624	0.40459	0.983372
Rint1	6.93424	3	0.0740237	0.475617	3'UTR(M),CDS	-0.209727	#N/A	#N/A	#N/A
Dph5	3.18988	1	0.0740952	0.475617	3'UTR(M),3'UTR(F),Intron	-0.144352	#N/A	#N/A	#N/A
Sema4g	3.18426	1	0.0743508	0.476326	3'UTR(F),Intron	-0.128744	#N/A	#N/A	#N/A
Fbln1	5.19737	2	0.0743715	0.476326	3'UTR(M),3'UTR(L),Intron	-0.12841	#N/A	#N/A	#N/A
Ano3	3.17423	1	0.0748086	0.478472	3'UTR(L),Intron	0.102381	#N/A	#N/A	#N/A
Gdf11	3.17282	1	0.0748731	0.478472	3'UTR(M)	0.105144	#N/A	#N/A	#N/A
Mynn	5.18015	2	0.0750145	0.478843	3'UTR(M)	0.0894988	#N/A	#N/A	#N/A
Aacs	3.16729	1	0.075127	0.479028	3'UTR(M),Intron	-0.14482	-0.832162	0.145482	0.983372
Lrfn5	3.16043	1	0.0754434	0.480023	3'UTR(F),Intron	0.0791975	#N/A	#N/A	#N/A
Ctnnbip1	5.16652	2	0.0755274	0.480023	3'UTR(M),3'UTR(F)	-0.0183342	#N/A	#N/A	#N/A
A630072M18Rik	3.1571	1	0.0755972	0.480023	ncRNA	0.198485	#N/A	#N/A	#N/A
Susd6	3.15667	1	0.0756172	0.480023	5UTR,3'UTR(M),CDS	-0.0801391	#N/A	#N/A	#N/A
Limd1	11.4381	6	0.0757453	0.480306	3'UTR(M),3'UTR(L),Intron	0.0964647	#N/A	#N/A	#N/A
Rab14	3.14833	1	0.0760049	0.481414	3'UTR(M)	-0.076491	0.407731	0.271591	0.983372
Lrba	3.14414	1	0.0762001	0.481414	3'UTR(S),Intron	0.118661	0.606695	0.626071	0.983372
Atpaf1	3.14388	1	0.0762124	0.481414	3'UTR(M),Intron	-0.116527	#N/A	#N/A	#N/A
Nrf1	11.4191	6	0.0762554	0.481414	3'UTR(M),3'UTR(L),Intron	-0.0806075	#N/A	#N/A	#N/A
Pcgf5	6.86346	3	0.0763795	0.481669	3'UTR(M),3'UTR(F),Intron	-0.101957	#N/A	#N/A	#N/A
Scd3	5.13564	2	0.0767027	0.483162	3'UTR(M),3'UTR(L),3'UTR(F)	0.0511905	#N/A	#N/A	#N/A
Eif3c	3.13033	1	0.0768481	0.483162	CDS	-0.063195	0.106422	0.767981	0.987949
Lamc1	3.1299	1	0.0768685	0.483162	3'UTR(M),Intron	0.174506	#N/A	#N/A	#N/A
Pcbd2	5.12869	2	0.0769696	0.483268	3'UTR(M),3'UTR(F),Intron	-0.188646	0.356621	0.498481	0.983372
Slco3a1	5.12268	2	0.077201	0.48343	Intron,3'UTR(F)	-0.0131826	#N/A	#N/A	#N/A
Elovl4	3.12024	1	0.0773253	0.48343	3'UTR(M)	0.112538	#N/A	#N/A	#N/A
Yipf6	3.11907	1	0.0773812	0.48343	3'UTR(M),3'UTR(L)	-0.169701	#N/A	#N/A	#N/A
Brip1os	5.11515	2	0.0774923	0.48343	ncRNA	-0.0559587	#N/A	#N/A	#N/A
L3mbtl3	3.11491	1	0.0775786	0.48343	3'UTR(L),Intron	-0.254358	#N/A	#N/A	#N/A
Zfp105	3.11461	1	0.0775931	0.48343	3'UTR(L),3'UTR(F)	-0.363124	#N/A	#N/A	#N/A
Qtrt1	5.10933	2	0.0777181	0.48343	3'UTR(S),Intron	0.0775925	0.301563	0.781422	0.987949
Eif4e2	3.11042	1	0.0777931	0.48343	3'UTR(M),Intron	0.117664	#N/A	#N/A	#N/A
Kif9	5.10609	2	0.0778442	0.48343	3'UTR(S),Intron	0.236942	#N/A	#N/A	#N/A
Rps6kb1	3.10454	1	0.0780743	0.48343	3'UTR(M),3'UTR(F)	0.112304	#N/A	#N/A	#N/A
Tjp2	3.10372	1	0.0781137	0.48343	3'UTR(M),3'UTR(L)	-0.249171	0.265461	0.66674	0.983372
Pacs1	3.10356	1	0.0781213	0.48343	3'UTR(M),Intron	0.107919	0.0439576	0.812541	0.987949
March3	5.0978	2	0.0781675	0.48343	Intron	-0.11586	#N/A	#N/A	#N/A
Arhgef10	3.10247	1	0.0781735	0.48343	3'UTR(M)	-0.087052	#N/A	#N/A	#N/A
Cd200	3.09778	1	0.078399	0.483861	3'UTR(L),Intron,3'UTR(F)	-0.08515	-0.0491656	0.805195	0.987949
Entpd1	5.09157	2	0.0784115	0.483861	3'UTR(M),Intron	0.237577	-0.12182	0.893217	0.994478
Dmd	5.08653	2	0.0786092	0.483884	3'UTR(M),Intron	-0.045704	0.821224	0.246624	0.983372
Luzp2	3.0929	1	0.0786347	0.483884	3'UTR(M)	0.0773826	#N/A	#N/A	#N/A
Grin3a	3.09221	1	0.0786681	0.483884	3'UTR(M)	0.133831	#N/A	#N/A	#N/A
Efcab14	5.07884	2	0.0789121	0.484584	3'UTR(M),Intron	0.101515	#N/A	#N/A	#N/A
Dopey2	3.08486	1	0.079024	0.484584	3'UTR(S),Intron	-0.0431729	#N/A	#N/A	#N/A
Slc7a2	3.08464	1	0.0790349	0.484584	3'UTR(M),3'UTR(L)	0.080452	1.25121	0.215157	0.983372
Gnpnat1	5.0708	2	0.0792299	0.484971	3'UTR(M)	-0.0325755	#N/A	#N/A	#N/A
Kmt2a	3.07987	1	0.0792668	0.484971	3'UTR(M)	-0.0888993	#N/A	#N/A	#N/A
Zfp609	3.07379	1	0.0795638	0.48627	3'UTR(M)	-0.164646	#N/A	#N/A	#N/A
Fuca2	3.06913	1	0.0797922	0.487148	3'UTR(M),3'UTR(L)	0.241167	#N/A	#N/A	#N/A
Lysmd4	5.04724	2	0.0801688	0.487648	3'UTR(M),3'UTR(L),Intron	-0.0172479	#N/A	#N/A	#N/A
Nectin4	3.06008	1	0.0802376	0.487648	3'UTR(M),3'UTR(L)	0.22922	#N/A	#N/A	#N/A
Ppp1r7	3.05728	1	0.0803759	0.487648	3'UTR(M),3'UTR(F)	0.084916	-0.179506	0.393487	0.983372
Srrt	3.05483	1	0.0804973	0.487648	CDS	-0.183567	0.463009	0.408258	0.983372
Ncoa6	3.05285	1	0.0805955	0.487648	3'UTR(M),CDS	-0.0593893	#N/A	#N/A	#N/A
Park2	6.73635	3	0.0807932	0.487648	3'UTR(L),Intron	0.12855	#N/A	#N/A	#N/A
Nop58	3.04835	1	0.0808191	0.487648	CDS	0.0873986	0.0585209	0.849105	0.987949
Nans	3.04788	1	0.0808427	0.487648	3'UTR(M),CDS,3'UTR(F)	-0.0916731	-0.0842884	0.818978	0.987949
Acbd3	5.0287	2	0.0809154	0.487648	3'UTR(M),CDS,Intron	0.11533	0.475021	0.368131	0.983372
Prelid3a	5.02403	2	0.0811047	0.487648	3'UTR(M),Intron	-0.0728715	#N/A	#N/A	#N/A
Arpin	3.04228	1	0.081122	0.487648	3'UTR(M)	-0.114764	0.205644	0.612856	0.983372
Slc30a4	3.04188	1	0.0811421	0.487648	3'UTR(M),3'UTR(L),Intron	-0.167169	#N/A	#N/A	#N/A
9130019O22Rik	3.04142	1	0.0811649	0.487648	3'UTR(M),3'UTR(F)	-0.229679	#N/A	#N/A	#N/A
Pcnx4	5.02141	2	0.0812108	0.487648	3'UTR(F),Intron	-0.0289896	#N/A	#N/A	#N/A
Cand1	6.7198	3	0.0813857	0.487648	3'UTR(M),Intron	-0.0707026	0.00867015	0.955086	0.997933
Arl5b	3.03463	1	0.0815052	0.487648	3'UTR(M)	0.367987	#N/A	#N/A	#N/A
Igsf3	3.03438	1	0.0815179	0.487648	3'UTR(M)	-0.176973	-1.37163	0.42856	0.983372
Tmem63c	5.01332	2	0.0815399	0.487648	3'UTR(M),3'UTR(L),Intron	0.168212	#N/A	#N/A	#N/A
Pnpla8	5.00997	2	0.0816769	0.487648	3'UTR(M),CDS,3'UTR(F)	-0.0632521	0.353304	0.562257	0.983372
Suv39h2	3.02958	1	0.081759	0.487648	3'UTR(M),CDS,Intron	-0.313059	#N/A	#N/A	#N/A
Emb	5.00716	2	0.0817916	0.487648	3'UTR(M),3'UTR(F),Intron	0.113374	-0.306459	0.48698	0.983372
Fras1	3.02773	1	0.0818523	0.487648	3'UTR(M),3'UTR(L),3'UTR(F)	-0.281896	#N/A	#N/A	#N/A
Amn1	3.02632	1	0.0819238	0.487648	3'UTR(M)	0.225448	#N/A	#N/A	#N/A
Arl5a	6.70358	3	0.0819706	0.487648	3'UTR(M),3'UTR(L)	0.108197	#N/A	#N/A	#N/A
Zfp40	5.00216	2	0.0819962	0.487648	3'UTR(M),Intron	-0.0494651	#N/A	#N/A	#N/A
Sept3	4.99804	2	0.0821653	0.488149	3'UTR(L),Intron	-0.0264732	#N/A	#N/A	#N/A
Prps2	3.01558	1	0.082468	0.489441	3'UTR(M),3'UTR(L)	0.193385	0.206786	0.49398	0.983372
Gmcl1	4.98656	2	0.0826384	0.489579	3'UTR(M),Intron	-0.200573	#N/A	#N/A	#N/A
Dnajc19	4.98419	2	0.0827364	0.489579	3'UTR(L),Intron	0.111725	-0.946211	0.259774	0.983372
Cul4b	4.98187	2	0.0828326	0.489579	3'UTR(M),3'UTR(F)	-0.0780813	0.203283	0.724215	0.987949
Pcx	3.00831	1	0.0828386	0.489579	3'UTR(M),3'UTR(F)	-0.0688922	-0.254243	0.203023	0.983372
ENSMUSG00000091127	4.97684	2	0.083041	0.489579	Pseudogene	-0.169341	#N/A	#N/A	#N/A
Ints12	3.00347	1	0.0830862	0.489579	3'UTR(M),3'UTR(F)	0.188188	#N/A	#N/A	#N/A
Psmc5	3.00344	1	0.0830878	0.489579	CDS,3'UTR(F)	0.0833565	-0.107254	0.577044	0.983372
Gatm	2.99429	1	0.0835585	0.491848	3'UTR(M),3'UTR(L)	-0.117511	0.663533	0.578165	0.983372
Zfp286	4.96209	2	0.0836559	0.491917	3'UTR(L),Intron,3'UTR(F)	0.13784	#N/A	#N/A	#N/A
Farp1	4.95954	2	0.0837626	0.492041	3'UTR(M),3'UTR(L),Intron	-0.0193357	#N/A	#N/A	#N/A
Tle3	2.98823	1	0.0838719	0.49218	3'UTR(M)	-0.0433092	#N/A	#N/A	#N/A
Ccdc32	2.98519	1	0.0840296	0.492194	3'UTR(M),3'UTR(L)	0.076438	#N/A	#N/A	#N/A
Myef2	2.98488	1	0.0840457	0.492194	3'UTR(L),Intron	0.0831581	0.181971	0.438854	0.983372
Dusp15	2.98221	1	0.0841844	0.492436	3'UTR(M),3'UTR(L)	0.22186	#N/A	#N/A	#N/A
Gnl1	2.97962	1	0.0843188	0.492436	3'UTR(M),CDS	-0.0505359	0.0245098	0.908719	0.99554
Clpb	4.94207	2	0.0844973	0.492436	3'UTR(M),CDS	0.070612	-0.044138	0.918181	0.99692
Nfatc3	4.94022	2	0.0845755	0.492436	3'UTR(M),Intron	0.0288872	#N/A	#N/A	#N/A
Nmral1	2.97315	1	0.0846568	0.492436	3'UTR(M),Intron,3'UTR(F)	0.0860875	-0.765745	0.0601481	0.983372
Cdkal1	4.93641	2	0.0847368	0.492436	CDS,Intron	0.00802137	#N/A	#N/A	#N/A
R3hdm2	2.97027	1	0.0848079	0.492436	5UTR,3'UTR(F)	0.0578351	#N/A	#N/A	#N/A
Lpar1	2.96789	1	0.0849327	0.492436	3'UTR(M),Intron	-0.0613236	#N/A	#N/A	#N/A
Hist3h2a	4.93144	2	0.0849475	0.492436	3'UTR(M)	-0.0321226	#N/A	#N/A	#N/A
Crtc3	2.96701	1	0.0849786	0.492436	3'UTR(M),3'UTR(L),3'UTR(F)	-0.14691	2.3939	0.566823	0.983372
Fndc3a	4.92755	2	0.085113	0.492436	3'UTR(M),CDS,Intron	-0.086032	#N/A	#N/A	#N/A
Cbr4	2.96433	1	0.0851197	0.492436	3'UTR(M),3'UTR(F)	-0.155791	#N/A	#N/A	#N/A
Ttc5	2.96077	1	0.0853071	0.492436	3'UTR(M),Intron	-0.216877	#N/A	#N/A	#N/A
Ssr1	4.92135	2	0.0853772	0.492436	3'UTR(M)	0.0666605	0.00662342	0.988279	0.997933
Dtnb	2.9587	1	0.0854167	0.492436	3'UTR(M),3'UTR(F),Intron	0.110328	-0.340384	0.687423	0.986429
Adcy8	2.95791	1	0.0854584	0.492436	Intron,3'UTR(F)	-0.0561503	1.95518	0.284162	0.983372
Zfp870	2.95528	1	0.0855975	0.492743	3'UTR(M)	-0.234282	#N/A	#N/A	#N/A
Gdap1l1	2.95104	1	0.0858223	0.493543	3'UTR(M),3'UTR(F)	0.165892	#N/A	#N/A	#N/A
Uimc1	4.90527	2	0.0860667	0.494453	3'UTR(M),Intron,3'UTR(F)	0.172342	0.351865	0.407512	0.983372
Mboat2	4.89887	2	0.0863425	0.494822	3'UTR(M),3'UTR(L),3'UTR(F)	-0.0816943	0.237041	0.790392	0.987949
Dgki	4.89788	2	0.0863853	0.494822	3'UTR(L),Intron	0.0085707	#N/A	#N/A	#N/A
Usp15	4.89571	2	0.0864787	0.494822	3'UTR(M),3'UTR(L)	0.116999	0.394765	0.461582	0.983372
Itgb1	4.89446	2	0.086533	0.494822	3'UTR(M),Intron	-0.0776775	-0.918909	0.160859	0.983372
Hip1	4.8938	2	0.0865616	0.494822	3'UTR(M),3'UTR(L),Intron	0.10448	1.04932	0.252542	0.983372
Ick	4.89134	2	0.0866681	0.494938	3'UTR(M),3'UTR(L),3'UTR(F)	0.106086	#N/A	#N/A	#N/A
Drg2	2.93211	1	0.086834	0.495394	3'UTR(M),3'UTR(L),3'UTR(F)	0.140096	-0.161729	0.618202	0.983372
Mtus2	4.88043	2	0.0871419	0.496657	3'UTR(L),3'UTR(F),Intron	-0.133992	-0.657462	0.72728	0.987949
Flt3l	2.92292	1	0.0873298	0.497235	3'UTR(S),Intron	0.341821	#N/A	#N/A	#N/A
3110053B16Rik	2.92057	1	0.0874572	0.497272	Pseudogene	-0.28	#N/A	#N/A	#N/A
Oscp1	4.87202	2	0.0875094	0.497272	3'UTR(M),3'UTR(F)	0.1148	#N/A	#N/A	#N/A
Larp4	2.9167	1	0.0876671	0.497624	3'UTR(M)	0.305067	#N/A	#N/A	#N/A
Pmpcb	2.91527	1	0.0877446	0.497624	3'UTR(M),3'UTR(F)	0.114187	-0.407254	0.454196	0.983372
Hook3	4.85852	2	0.088102	0.497865	3'UTR(M),Intron	-0.171422	#N/A	#N/A	#N/A
ENSMUSG00000085769	2.90848	1	0.088115	0.497865	Pseudogene	0.215876	#N/A	#N/A	#N/A
Osbpl3	4.85727	2	0.0881569	0.497865	3'UTR(M),3'UTR(L),3'UTR(F)	0.140271	#N/A	#N/A	#N/A
Rcbtb2	2.90713	1	0.0881888	0.497865	3'UTR(M),3'UTR(F)	-0.132884	2.97557	0.223612	0.983372
Plpbp	4.85583	2	0.0882204	0.497865	3'UTR(M),3'UTR(L),Intron	0.180073	-0.208623	0.300631	0.983372
Mterf4	2.89945	1	0.0886095	0.499424	3'UTR(M),3'UTR(F)	0.129853	#N/A	#N/A	#N/A
Chrm3	2.89557	1	0.0888231	0.499424	3'UTR(L),Intron	-0.121235	#N/A	#N/A	#N/A
Ech1	2.89524	1	0.0888416	0.499424	CDS,Intron	-0.0964588	-0.180188	0.774272	0.987949
2810459M11Rik	4.84173	2	0.0888445	0.499424	3'UTR(M)	-0.00468337	-0.381464	0.630701	0.983372
Rps15a	2.89244	1	0.0889958	0.499786	3'UTR(M),3'UTR(F)	0.118973	#N/A	#N/A	#N/A
Ndst4	4.83505	2	0.089142	0.500118	3'UTR(M),Intron	-0.0990937	#N/A	#N/A	#N/A
Tasp1	2.88607	1	0.0893485	0.500177	3'UTR(L),Intron	0.127858	#N/A	#N/A	#N/A
Baz2b	6.50579	3	0.0894346	0.500177	3'UTR(M),3'UTR(L),CDS,Intron	-0.034297	#N/A	#N/A	#N/A
Tfg	2.88384	1	0.0894725	0.500177	3'UTR(M),Intron	-0.0731337	-0.107069	0.622977	0.983372
Cwc27	4.82702	2	0.0895007	0.500177	3'UTR(M),Intron	-0.0851803	#N/A	#N/A	#N/A
Wac	6.49125	3	0.0900081	0.502523	3'UTR(M),Intron	-0.0676068	#N/A	#N/A	#N/A
Paqr3	6.48733	3	0.0901634	0.502902	Intron,3'UTR(F)	0.0940081	#N/A	#N/A	#N/A
Iws1	6.48353	3	0.0903144	0.503255	3'UTR(M),3'UTR(F)	0.200635	#N/A	#N/A	#N/A
Supt4a	2.8641	1	0.0905763	0.504207	3'UTR(M),3'UTR(F)	0.121315	#N/A	#N/A	#N/A
Nkrf	4.80126	2	0.0906606	0.504207	3'UTR(M),3'UTR(L)	0.149445	#N/A	#N/A	#N/A
Thap3	2.85213	1	0.0912531	0.506314	3'UTR(S),Intron	-0.14501	#N/A	#N/A	#N/A
Rap2c	2.85072	1	0.0913332	0.506314	3'UTR(M)	-0.228189	#N/A	#N/A	#N/A
Dgkh	4.7851	2	0.0913963	0.506314	3'UTR(L),Intron	-0.115541	#N/A	#N/A	#N/A
Dnajc2	2.84787	1	0.0914953	0.506314	3'UTR(S),CDS	0.134088	#N/A	#N/A	#N/A
Kbtbd3	4.78183	2	0.0915457	0.506314	3'UTR(L),CDS,3'UTR(F)	-0.115166	#N/A	#N/A	#N/A
Gm11940	2.84408	1	0.0917113	0.506314	ncRNA	0.0937723	#N/A	#N/A	#N/A
Dglucy	2.84222	1	0.091817	0.506314	3'UTR(M),3'UTR(F)	0.352181	#N/A	#N/A	#N/A
Sft2d2	2.84147	1	0.0918601	0.506314	3'UTR(M),3'UTR(L)	0.339761	1.12133	0.626414	0.983372
Parp1	2.84088	1	0.0918941	0.506314	3'UTR(M),3'UTR(F)	-0.0960411	0.744755	0.188468	0.983372
Htatip2	2.83931	1	0.0919836	0.506314	3'UTR(M),3'UTR(F)	0.097451	#N/A	#N/A	#N/A
Tmem69	6.43961	3	0.0920747	0.506314	3'UTR(M),3'UTR(L),Intron	0.042735	#N/A	#N/A	#N/A
Kdm3b	4.76551	2	0.0922959	0.506314	3'UTR(M),Intron	-0.0405673	#N/A	#N/A	#N/A
Opcml	2.83298	1	0.0923467	0.506314	3'UTR(M),Intron	-0.0842174	#N/A	#N/A	#N/A
Zxda	4.76252	2	0.092434	0.506314	Pseudogene	-0.134769	#N/A	#N/A	#N/A
Nucb2	2.83144	1	0.0924357	0.506314	3'UTR(M),3'UTR(F)	0.101267	-2.5617	0.057493	0.983372
Stac2	2.83119	1	0.0924496	0.506314	3'UTR(L),Intron	0.0652598	#N/A	#N/A	#N/A
Stk10	2.82926	1	0.0925612	0.506442	3'UTR(M),Intron	-0.313638	#N/A	#N/A	#N/A
Gm6136	2.82535	1	0.0927869	0.507194	Pseudogene	-0.102498	#N/A	#N/A	#N/A
Limch1	2.82116	1	0.0930292	0.507486	3'UTR(M),3'UTR(L)	-0.107069	0.213073	0.668577	0.983372
Svip	4.74818	2	0.093099	0.507486	3'UTR(M),CDS	0.0190826	0.444809	0.353014	0.983372
Zfp945	2.81985	1	0.0931053	0.507486	3'UTR(M),CDS	0.0619116	#N/A	#N/A	#N/A
Chd3	2.81798	1	0.0932134	0.507594	3'UTR(M),CDS	-0.0449762	0.400339	0.778108	0.987949
Diexf	4.74306	2	0.0933378	0.50779	3'UTR(M),3'UTR(F)	-0.275052	#N/A	#N/A	#N/A
Zbtb3	2.81304	1	0.0935008	0.508195	3'UTR(M),3'UTR(F)	0.215386	#N/A	#N/A	#N/A
Smarca4	2.80863	1	0.0937583	0.508284	CDS,3'UTR(F)	-0.0628678	0.510063	0.654546	0.983372
Asph	4.73156	2	0.0938759	0.508284	Intron	-0.076519	-0.217183	0.56369	0.983372
Ap5m1	4.72938	2	0.0939785	0.508284	3'UTR(F),Intron	-0.110193	#N/A	#N/A	#N/A
Rnf217	2.80357	1	0.0940548	0.508284	3'UTR(M),3'UTR(L)	-0.40255	#N/A	#N/A	#N/A
Zfp260	2.80175	1	0.0941614	0.508284	3'UTR(M),3'UTR(L)	0.0864382	#N/A	#N/A	#N/A
Gfod1	2.80171	1	0.0941641	0.508284	3'UTR(M),Intron	0.00768098	#N/A	#N/A	#N/A
Mib1	2.79771	1	0.0943991	0.508284	3'UTR(M)	0.0633386	#N/A	#N/A	#N/A
Prpf4	6.38187	3	0.0944395	0.508284	3'UTR(M)	-0.212548	0.946537	0.308853	0.983372
Jmjd4	7.92051	4	0.0945338	0.508284	3'UTR(M)	0.0424353	#N/A	#N/A	#N/A
Itpr2	4.7169	2	0.0945666	0.508284	3'UTR(M),3'UTR(L),3'UTR(F)	-0.255922	#N/A	#N/A	#N/A
Lrrc24	2.7935	1	0.0946474	0.508284	3'UTR(M),3'UTR(F)	0.136022	#N/A	#N/A	#N/A
Gpr137c	4.71323	2	0.0947403	0.508284	3'UTR(L),Intron	0.0762921	#N/A	#N/A	#N/A
Slc11a2	4.71309	2	0.094747	0.508284	3'UTR(L),Intron,3'UTR(F)	0.191697	#N/A	#N/A	#N/A
Golga4	4.70848	2	0.0949657	0.508284	3'UTR(M),CDS	-0.0684829	-1.93853	0.373696	0.983372
Bmpr1b	2.78803	1	0.0949711	0.508284	3'UTR(S),Intron	-0.123291	#N/A	#N/A	#N/A
Stx3	6.36908	3	0.0949712	0.508284	3'UTR(M),Intron,3'UTR(F)	-0.0949895	#N/A	#N/A	#N/A
Rb1cc1	2.78661	1	0.0950549	0.508284	3'UTR(M)	0.108547	0.144274	0.885338	0.993444
Mesd	2.78569	1	0.0951098	0.508284	3'UTR(M),CDS,3'UTR(F)	0.208335	0.270264	0.444786	0.983372
Ak5	2.784	1	0.09521	0.508314	3'UTR(M),Intron	-0.0476093	#N/A	#N/A	#N/A
Gzf1	2.78121	1	0.0953764	0.508314	3'UTR(M)	-0.0917486	#N/A	#N/A	#N/A
Decr1	2.78113	1	0.0953808	0.508314	3'UTR(M),3'UTR(F)	-0.199052	-0.182414	0.485921	0.983372
Ercc4	2.77846	1	0.0955401	0.508314	3'UTR(M)	-0.147379	#N/A	#N/A	#N/A
Mrpl48-ps	2.77816	1	0.0955577	0.508314	Pseudogene	-0.050957	#N/A	#N/A	#N/A
1700096K18Rik	2.77588	1	0.0956942	0.508569	ncRNA	0.46976	#N/A	#N/A	#N/A
Mapk1	2.76763	1	0.0961885	0.510614	3'UTR(M),Intron	-0.0430458	0.0226196	0.872023	0.993444
Dnmbp	2.76431	1	0.096388	0.510614	Intron	0.186478	#N/A	#N/A	#N/A
Dis3l	4.67857	2	0.0963964	0.510614	3'UTR(M),3'UTR(L),Intron,3'UTR(F)	-0.177257	#N/A	#N/A	#N/A
Ccny	4.67778	2	0.0964344	0.510614	3'UTR(M),Intron	-0.103889	0.380361	0.471724	0.983372
Fbxl18	2.75063	1	0.0972164	0.514035	3'UTR(M),3'UTR(L)	0.0576072	#N/A	#N/A	#N/A
C130060K24Rik	2.74865	1	0.0973363	0.514035	Intron	0.0824287	#N/A	#N/A	#N/A
Sike1	4.65891	2	0.0973489	0.514035	3'UTR(M),3'UTR(L),Intron	0.112825	4.9377	0.0139643	0.983372
Ube2cbp	2.74649	1	0.0974679	0.51419	3'UTR(L),Intron	-0.441289	#N/A	#N/A	#N/A
Alyref	6.30587	3	0.0976409	0.51463	3'UTR(M)	-0.0464145	0.176603	0.497111	0.983372
Sf3a1	2.73499	1	0.098172	0.516868	3'UTR(M),3'UTR(L),3'UTR(F)	0.0575322	0.453388	0.205031	0.983372
Brf2	4.64058	2	0.0982453	0.516868	3'UTR(M),3'UTR(F)	0.0873782	#N/A	#N/A	#N/A
Ercc3	2.72718	1	0.0986535	0.518501	3'UTR(M),3'UTR(L),3'UTR(F)	0.0481389	1.28445	0.364853	0.983372
Strn3	4.62961	2	0.0987852	0.518501	3'UTR(M),Intron	-0.0432753	-0.368615	0.305128	0.983372
Exoc8	6.27715	3	0.0988777	0.518501	3'UTR(M)	0.0488098	-0.413012	0.295701	0.983372
Gli3	2.72292	1	0.0989167	0.518501	3'UTR(M),3'UTR(L),Intron	-0.177967	#N/A	#N/A	#N/A
Large1	2.71387	1	0.0994794	0.52047	3'UTR(M),Intron	-0.0230273	#N/A	#N/A	#N/A
Exosc9	2.71383	1	0.0994821	0.52047	3'UTR(M),3'UTR(F)	-0.115392	-5.68511	0.0146927	0.983372
Cxxc5	2.71251	1	0.0995643	0.52047	3'UTR(M),3'UTR(F)	0.0662161	#N/A	#N/A	#N/A
Thnsl1	6.25513	3	0.0998364	0.521418	3'UTR(M),CDS	-0.0854509	-0.756567	0.392243	0.983372
Psmb4	4.60019	2	0.10025	0.5231	3'UTR(M),CDS,3'UTR(F)	0.0460674	-0.302972	0.205035	0.983372
Paqr7	2.69685	1	0.100547	0.523844	3'UTR(M),3'UTR(L)	-0.0788395	#N/A	#N/A	#N/A
Timm44	2.695	1	0.100663	0.523844	3'UTR(M),3'UTR(L),CDS	-0.0940089	-0.145902	0.657291	0.983372
Nipsnap1	2.69497	1	0.100666	0.523844	3'UTR(M),3'UTR(F)	0.0843283	-0.169437	0.339333	0.983372
Vgf	2.69138	1	0.100892	0.524124	3'UTR(M)	0.0495904	#N/A	#N/A	#N/A
Stox2	4.58668	2	0.100929	0.524124	3'UTR(M)	-0.0848544	#N/A	#N/A	#N/A
Inpp4b	2.6887	1	0.101062	0.524124	Intron	0.216972	#N/A	#N/A	#N/A
Sh3bgrl2	2.68742	1	0.101144	0.524124	3'UTR(M)	0.209513	0.431531	0.28916	0.983372
Tab2	2.68692	1	0.101176	0.524124	3'UTR(L),Intron	-0.11165	#N/A	#N/A	#N/A
Washc2	2.68328	1	0.101407	0.524849	3'UTR(M),3'UTR(F),Intron	-0.0653526	0.174182	0.726338	0.987949
Tmem186	6.215	3	0.101606	0.525405	3'UTR(M),Intron	-0.0569453	#N/A	#N/A	#N/A
Rell1	2.67392	1	0.102004	0.526725	3'UTR(M)	0.191399	#N/A	#N/A	#N/A
Prkcz	2.6733	1	0.102044	0.526725	3'UTR(L),3'UTR(F)	0.108766	-1.49276	0.35246	0.983372
Mmaa	2.67021	1	0.102243	0.527274	3'UTR(M),3'UTR(L),3'UTR(F)	0.111625	-0.720289	0.539746	0.983372
Bdh1	2.66553	1	0.102544	0.527861	3'UTR(L),3'UTR(F)	0.0616104	0.131325	0.554579	0.983372
Nt5c2	2.66517	1	0.102567	0.527861	3'UTR(M)	-0.128455	0.256	0.699163	0.987949
Lactb	2.66414	1	0.102633	0.527861	3'UTR(M),3'UTR(L),CDS,Intron	-0.207494	0.13811	0.658007	0.983372
Tmtc2	2.66274	1	0.102724	0.527861	3'UTR(L),Intron	-0.239512	#N/A	#N/A	#N/A
Hira	2.65937	1	0.102941	0.528148	3'UTR(F),Intron	0.0711071	#N/A	#N/A	#N/A
Uspl1	2.65677	1	0.10311	0.528148	3'UTR(L),CDS	-0.126968	#N/A	#N/A	#N/A
Prkaa1	2.65574	1	0.103177	0.528148	3'UTR(M)	0.15293	-0.692859	0.318421	0.983372
Rmdn2	2.65431	1	0.10327	0.528148	3'UTR(M)	0.171575	#N/A	#N/A	#N/A
Sipa1l3	4.54033	2	0.103295	0.528148	3'UTR(M),3'UTR(L),Intron	0.0143447	0.228542	0.648316	0.983372
Zbtb8os	2.65141	1	0.103458	0.528148	3'UTR(M),3'UTR(F)	0.183376	0.26344	0.566403	0.983372
Myo1e	2.65127	1	0.103467	0.528148	3'UTR(M),3'UTR(L)	0.0549242	#N/A	#N/A	#N/A
Gm4879	2.65019	1	0.103538	0.528148	Pseudogene	-0.195128	#N/A	#N/A	#N/A
Gfm1	4.53277	2	0.103686	0.528148	3'UTR(M),CDS,Intron	0.169138	-0.388652	0.384207	0.983372
Bpnt1	2.64771	1	0.103699	0.528148	3'UTR(M),3'UTR(F)	-0.158912	-0.0981423	0.622913	0.983372
Ivns1abp	2.64328	1	0.103989	0.529032	3'UTR(M),Intron	-0.0747695	#N/A	#N/A	#N/A
Ndufaf6	2.64224	1	0.104057	0.529032	3'UTR(M),3'UTR(F)	0.110664	#N/A	#N/A	#N/A
2310015A10Rik	2.63311	1	0.104657	0.529735	ncRNA	0.216373	#N/A	#N/A	#N/A
Fra10ac1	2.63292	1	0.104669	0.529735	3'UTR(L),Intron,3'UTR(F)	0.211683	#N/A	#N/A	#N/A
Zzef1	4.51294	2	0.10472	0.529735	3'UTR(M),3'UTR(F),Intron	0.105443	0.182033	0.831647	0.987949
Ybx3	4.51287	2	0.104723	0.529735	3'UTR(M),Intron,3'UTR(F)	0.0225175	0.74532	0.56648	0.983372
Cir1	2.63109	1	0.10479	0.529735	CDS,3'UTR(F)	-0.213998	#N/A	#N/A	#N/A
Spryd7	4.51156	2	0.104792	0.529735	3'UTR(M)	-0.0610877	0.865261	0.357709	0.983372
Stat1	4.51053	2	0.104846	0.529735	3'UTR(M),Intron	0.172297	0.25778	0.742427	0.987949
Zfp74	2.62893	1	0.104933	0.529735	3'UTR(M)	0.174734	#N/A	#N/A	#N/A
Lin9	4.50645	2	0.10506	0.52991	3'UTR(M),Intron	0.258929	#N/A	#N/A	#N/A
Trmu	2.62057	1	0.105486	0.530994	3'UTR(L),3'UTR(F)	0.0498767	0.679325	0.632129	0.983372
Parg	6.12624	3	0.105627	0.530994	3'UTR(M)	0.153179	#N/A	#N/A	#N/A
Rasa1	4.49407	2	0.105712	0.530994	3'UTR(M),CDS	-0.0890677	#N/A	#N/A	#N/A
Ano6	2.6169	1	0.105731	0.530994	3'UTR(M)	0.0726863	#N/A	#N/A	#N/A
Ncoa2	4.49361	2	0.105737	0.530994	3'UTR(M),3'UTR(L),Intron	-0.0934443	#N/A	#N/A	#N/A
Napb	2.61429	1	0.105905	0.531375	3'UTR(M)	-0.041815	0.0633136	0.550306	0.983372
Tfip11	2.61223	1	0.106043	0.531601	3'UTR(M),3'UTR(L),3'UTR(F)	-0.0875404	#N/A	#N/A	#N/A
Nell1	2.60857	1	0.106287	0.532	3'UTR(M),3'UTR(F)	0.0884695	#N/A	#N/A	#N/A
Cdkl4	2.60796	1	0.106328	0.532	3'UTR(M),3'UTR(L),Intron	-0.251448	#N/A	#N/A	#N/A
Mndal	2.60528	1	0.106508	0.532	3'UTR(L),CDS,3'UTR(F)	-0.181808	#N/A	#N/A	#N/A
Sdk2	2.60353	1	0.106626	0.532	3'UTR(L),Intron	0.262994	#N/A	#N/A	#N/A
Chd4	2.60307	1	0.106657	0.532	3'UTR(M),CDS,3'UTR(F)	-0.0442991	-0.0782316	0.906604	0.99554
Bsn	2.60181	1	0.106742	0.532	3'UTR(L),Intron	0.0562493	0.0889548	0.610429	0.983372
Surf2	2.6	1	0.106863	0.532	3'UTR(M),3'UTR(F)	0.0642035	#N/A	#N/A	#N/A
Pisd-ps2	4.47087	2	0.106946	0.532	Pseudogene	0.323527	#N/A	#N/A	#N/A
Asxl2	6.09763	3	0.106956	0.532	3'UTR(M),Intron	0.062729	#N/A	#N/A	#N/A
Ankrd12	7.60723	4	0.107073	0.532123	3'UTR(M),CDS,Intron	-0.0501581	2.04493	0.38125	0.983372
Dennd1a	6.09064	3	0.107283	0.532704	3'UTR(M),3'UTR(L),Intron	0.0321299	#N/A	#N/A	#N/A
Ilf2	2.59058	1	0.107501	0.533209	3'UTR(M),3'UTR(F)	-0.10981	-0.115988	0.601164	0.983372
Tox	2.58956	1	0.10757	0.533209	3'UTR(M),3'UTR(L)	0.270326	#N/A	#N/A	#N/A
Zfp955b	4.45612	2	0.107737	0.533579	3'UTR(M)	-0.114895	#N/A	#N/A	#N/A
Dapk3	2.5839	1	0.107955	0.534018	3'UTR(M),3'UTR(F)	0.00884364	#N/A	#N/A	#N/A
Col5a1	6.0697	3	0.108268	0.534018	3'UTR(M),Intron	0.170623	#N/A	#N/A	#N/A
Arid3b	2.5791	1	0.108283	0.534018	3'UTR(M),Intron	0.341341	#N/A	#N/A	#N/A
Pxmp4	6.06851	3	0.108324	0.534018	3'UTR(M),Intron	-0.0801452	#N/A	#N/A	#N/A
Pknox1	2.57748	1	0.108394	0.534018	3'UTR(M),3'UTR(L),Intron	0.218088	#N/A	#N/A	#N/A
Osbp2	2.57576	1	0.108512	0.534018	3'UTR(M),Intron	-0.0952236	-0.713673	0.447078	0.983372
Acadsb	4.4403	2	0.108593	0.534018	3'UTR(M),3'UTR(F)	-0.0633275	-0.20563	0.548061	0.983372
Cdc42se2	4.43861	2	0.108685	0.534018	3'UTR(M),Intron	0.106646	-0.457891	0.0396283	0.983372
Bace1	6.06052	3	0.108703	0.534018	3'UTR(M)	-0.0198116	#N/A	#N/A	#N/A
2900052N01Rik	4.43695	2	0.108775	0.534018	ncRNA	0.0127849	#N/A	#N/A	#N/A
Ociad2	2.57086	1	0.108849	0.534018	3'UTR(M),3'UTR(F)	0.0800803	#N/A	#N/A	#N/A
Sec23a	2.56674	1	0.109133	0.534955	3'UTR(M),3'UTR(L)	0.0534833	0.152926	0.559657	0.983372
Mtmr1	2.56229	1	0.10944	0.535253	3'UTR(M)	-0.0982542	0.170971	0.568739	0.983372
Nup214	2.56228	1	0.109441	0.535253	3'UTR(M),3'UTR(F),Intron	-0.0535333	#N/A	#N/A	#N/A
BC030500	2.56181	1	0.109473	0.535253	3'UTR(M),3'UTR(F)	-0.202484	#N/A	#N/A	#N/A
Pias2	4.42058	2	0.109669	0.535753	3'UTR(M),3'UTR(F),Intron	-0.0936243	#N/A	#N/A	#N/A
Wdr45b	4.41299	2	0.110086	0.536951	3'UTR(M),3'UTR(L)	0.109461	1.2884	0.135298	0.983372
Hsd17b7	4.41272	2	0.110101	0.536951	3'UTR(M),3'UTR(L)	0.0610663	0.181737	0.800478	0.987949
Mfap3l	4.41025	2	0.110237	0.537054	3'UTR(M)	-0.106102	#N/A	#N/A	#N/A
Arhgap31	2.54905	1	0.110361	0.537054	3'UTR(M),Intron	0.134222	#N/A	#N/A	#N/A
AI854703	2.54845	1	0.110402	0.537054	Pseudogene	0.0977522	#N/A	#N/A	#N/A
Ocln	2.5462	1	0.11056	0.537337	3'UTR(M)	0.297615	#N/A	#N/A	#N/A
Rilpl1	2.54352	1	0.110747	0.537337	3'UTR(M),Intron	0.0905532	0.393596	0.352014	0.983372
Zc3h14	4.3997	2	0.11082	0.537337	3'UTR(M),3'UTR(F)	-0.069888	#N/A	#N/A	#N/A
Zfp655	4.39943	2	0.110835	0.537337	3'UTR(M),Intron	-0.0511419	#N/A	#N/A	#N/A
Pbrm1	2.54062	1	0.110951	0.537449	3'UTR(M)	-0.170159	#N/A	#N/A	#N/A
Tra2a	2.53862	1	0.111092	0.537668	3'UTR(M),3'UTR(L),Intron	-0.0541524	1.384	0.0413348	0.983372
Wdr19	2.53569	1	0.111298	0.537668	3'UTR(L),3'UTR(F),Intron	-0.286587	#N/A	#N/A	#N/A
Commd3	2.53339	1	0.111461	0.537668	3'UTR(F),Intron	0.0708496	-1.06892	0.0373699	0.983372
Ston1	4.38732	2	0.111508	0.537668	3'UTR(M),3'UTR(L),Intron	0.0635126	#N/A	#N/A	#N/A
Rpf1	4.38417	2	0.111684	0.537668	3'UTR(M),Intron	-0.125419	#N/A	#N/A	#N/A
Hist1h2be	2.52785	1	0.111852	0.537668	3'UTR(M),Intron	-0.585397	#N/A	#N/A	#N/A
Cd99l2	2.52746	1	0.11188	0.537668	3'UTR(M)	-0.131898	2.64477	0.0278818	0.983372
Sap30l	2.52437	1	0.1121	0.537668	3'UTR(M),3'UTR(F)	0.0978761	#N/A	#N/A	#N/A
Fam81a	2.52092	1	0.112345	0.537668	3'UTR(M),3'UTR(L)	0.0641512	1.38793	0.0790443	0.983372
Ofd1	2.52086	1	0.112349	0.537668	CDS,3'UTR(F)	-0.119672	#N/A	#N/A	#N/A
Phactr4	2.51968	1	0.112433	0.537668	3'UTR(M),3'UTR(L),Intron	-0.104396	-0.627047	0.654307	0.983372
Dpysl3	2.51962	1	0.112437	0.537668	3'UTR(M),3'UTR(F)	-0.0954939	-0.204396	0.266402	0.983372
Ulk4	4.36989	2	0.112484	0.537668	3'UTR(S),Intron	-0.0521303	#N/A	#N/A	#N/A
Rab11fip1	4.36898	2	0.112535	0.537668	3'UTR(M),3'UTR(L)	-0.204626	#N/A	#N/A	#N/A
Megf10	2.51796	1	0.112556	0.537668	3'UTR(M),Intron	-0.0560509	#N/A	#N/A	#N/A
Hnrnpc	5.98012	3	0.112581	0.537668	3'UTR(M)	0.0794902	0.198671	0.354062	0.983372
Asb1	2.51752	1	0.112587	0.537668	3'UTR(M)	-0.156895	#N/A	#N/A	#N/A
Armc2	2.51171	1	0.113003	0.539206	Intron	-0.410561	#N/A	#N/A	#N/A
Bnip1	2.50847	1	0.113236	0.539868	3'UTR(L),3'UTR(F),Intron	-0.0773245	#N/A	#N/A	#N/A
Fxr1	4.35208	2	0.11349	0.540631	3'UTR(M),3'UTR(F)	-0.121345	0.683769	0.206249	0.983372
Mbnl1	2.49889	1	0.113927	0.542175	3'UTR(M)	-0.130053	#N/A	#N/A	#N/A
Exog	2.49729	1	0.114043	0.542175	3'UTR(M)	-0.107458	0.255708	0.339351	0.983372
Plcb1	4.34096	2	0.114123	0.542175	3'UTR(M),Intron	-0.0432607	0.118128	0.49759	0.983372
Trmt11	2.49448	1	0.114246	0.542175	3'UTR(M),Intron	-0.181435	#N/A	#N/A	#N/A
St3gal6	2.49307	1	0.114348	0.542175	3'UTR(M),CDS,3'UTR(F)	-0.138265	#N/A	#N/A	#N/A
Akap10	2.49263	1	0.114381	0.542175	3'UTR(M),Intron	-0.0955324	0.632745	0.362121	0.983372
Mapre1	4.33248	2	0.114607	0.542427	3'UTR(M)	0.10204	0.309291	0.131395	0.983372
Usp27x	2.4893	1	0.114622	0.542427	3'UTR(M),3'UTR(L)	0.271765	#N/A	#N/A	#N/A
Fam3c	2.48542	1	0.114906	0.542967	3'UTR(M)	0.194478	-2.62384	0.360618	0.983372
Por	2.48226	1	0.115137	0.542967	3'UTR(L),3'UTR(F),Intron	-0.0584254	0.523132	0.197647	0.983372
Lamp2	4.32313	2	0.115145	0.542967	3'UTR(M),Intron	0.179672	0.510413	0.465253	0.983372
Zxdb	2.48178	1	0.115172	0.542967	3'UTR(M),3'UTR(F)	-0.102416	#N/A	#N/A	#N/A
Ocel1	7.42176	4	0.115209	0.542967	3'UTR(M),3'UTR(L),3'UTR(F),Intron	-0.0728369	#N/A	#N/A	#N/A
Ubash3b	4.31269	2	0.115747	0.544472	3'UTR(M),3'UTR(F)	-0.0168689	#N/A	#N/A	#N/A
Pitrm1	2.47313	1	0.115807	0.544472	3'UTR(M),3'UTR(F)	0.0888213	0.313425	0.445462	0.983372
Anapc16	2.47281	1	0.115831	0.544472	3'UTR(M)	-0.071329	#N/A	#N/A	#N/A
Prr16	2.47177	1	0.115908	0.544472	3'UTR(M),3'UTR(L),Intron	-0.176899	#N/A	#N/A	#N/A
Erlin2	2.46454	1	0.116442	0.546186	3'UTR(M)	0.073092	#N/A	#N/A	#N/A
Sall3	4.29884	2	0.116552	0.546186	3'UTR(M),3'UTR(L),3'UTR(F)	-0.309328	#N/A	#N/A	#N/A
Far1	4.2969	2	0.116665	0.546186	3'UTR(M)	-0.0634664	#N/A	#N/A	#N/A
Ccnk	2.46109	1	0.116698	0.546186	3'UTR(L),3'UTR(F)	-0.128352	#N/A	#N/A	#N/A
Pds5b	2.45873	1	0.116874	0.546186	3'UTR(M)	-0.106763	0.289159	0.698691	0.987949
Sema5a	4.2897	2	0.117085	0.546186	3'UTR(L),Intron	-0.106819	#N/A	#N/A	#N/A
Slc35a3	4.28923	2	0.117113	0.546186	3'UTR(M),Intron	0.195374	#N/A	#N/A	#N/A
Mycbp	5.88917	3	0.117128	0.546186	3'UTR(M),3'UTR(F)	-0.083905	-1.42477	0.182574	0.983372
Zfhx2	2.45417	1	0.117213	0.546186	3'UTR(M)	-0.0478301	#N/A	#N/A	#N/A
Stk39	2.45373	1	0.117246	0.546186	3'UTR(M),3'UTR(L),3'UTR(F)	-0.0868504	-0.421143	0.386657	0.983372
Msi1	2.45156	1	0.117408	0.546186	3'UTR(M),3'UTR(L)	0.159572	#N/A	#N/A	#N/A
Nefl	2.44982	1	0.117538	0.546186	3'UTR(M),3'UTR(F)	-0.0550935	-0.0102092	0.962629	0.997933
Cds1	2.44979	1	0.11754	0.546186	3'UTR(M),3'UTR(L)	0.110695	#N/A	#N/A	#N/A
Gm5422	2.44895	1	0.117603	0.546186	Pseudogene	0.22988	#N/A	#N/A	#N/A
Rpl21	2.44552	1	0.117861	0.546719	CDS,3'UTR(F)	0.126159	0.371526	0.247954	0.983372
Rgs7bp	4.27515	2	0.11794	0.546719	3'UTR(M),3'UTR(L),Intron	-0.0288964	-0.55515	0.170928	0.983372
Rab35	2.44248	1	0.118089	0.546719	3'UTR(M)	0.0906176	0.562532	0.295302	0.983372
Rap2b	2.44123	1	0.118183	0.546719	3'UTR(M)	0.0773686	-0.011759	0.928104	0.997933
Ccdc153	2.44026	1	0.118256	0.546719	3'UTR(L),3'UTR(F)	-0.403704	#N/A	#N/A	#N/A
Polr3f	2.43941	1	0.118321	0.546719	3'UTR(M)	-0.148921	#N/A	#N/A	#N/A
Nts	2.43824	1	0.118409	0.546719	3'UTR(M),3'UTR(L)	0.284028	#N/A	#N/A	#N/A
2410022M11Rik	2.43731	1	0.11848	0.546719	Pseudogene	-0.294904	#N/A	#N/A	#N/A
Rnf11	2.43315	1	0.118794	0.54773	3'UTR(M)	-0.0620152	-1.82561	0.0391635	0.983372
Rev3l	2.4313	1	0.118935	0.547863	3'UTR(M)	0.162468	#N/A	#N/A	#N/A
Zfp462	2.42935	1	0.119082	0.547863	3'UTR(M),3'UTR(F)	-0.0591036	#N/A	#N/A	#N/A
Herc3	2.429	1	0.119109	0.547863	3'UTR(M),Intron	0.0314714	#N/A	#N/A	#N/A
Senp5	5.84804	3	0.119242	0.548036	3'UTR(M),Intron	-0.174936	#N/A	#N/A	#N/A
Gm12216	2.42378	1	0.119507	0.548604	ncRNA	0.279766	#N/A	#N/A	#N/A
Kansl2	4.24793	2	0.119557	0.548604	3'UTR(L),Intron,3'UTR(F)	0.0493055	#N/A	#N/A	#N/A
Wdr35	2.41948	1	0.119835	0.549138	3'UTR(M),3'UTR(F)	0.123778	#N/A	#N/A	#N/A
Zbtb21	4.24151	2	0.119941	0.549138	3'UTR(M),3'UTR(L),3'UTR(F)	-0.17933	#N/A	#N/A	#N/A
Las1l	2.41647	1	0.120065	0.549138	3'UTR(M),3'UTR(F)	-0.141981	#N/A	#N/A	#N/A
Maf	2.41581	1	0.120116	0.549138	3'UTR(M)	0.104891	#N/A	#N/A	#N/A
Nmrk1	2.41535	1	0.120151	0.549138	3'UTR(M),3'UTR(L)	0.131008	#N/A	#N/A	#N/A
Sumo2	2.41293	1	0.120337	0.54955	3'UTR(M),Intron,3'UTR(F)	-0.21283	0.127627	0.379164	0.983372
Gm10125	5.81817	3	0.1208	0.550788	ncRNA	-0.0210819	#N/A	#N/A	#N/A
Uck2	4.22679	2	0.120827	0.550788	3'UTR(M),3'UTR(L),Intron	0.115989	#N/A	#N/A	#N/A
Slc7a1	2.40556	1	0.120905	0.550788	3'UTR(M),3'UTR(L)	-0.193423	-1.74444	0.0832103	0.983372
Urod	2.40436	1	0.120998	0.550788	3'UTR(M),3'UTR(F)	0.152033	-2.96222	0.0809646	0.983372
Bcl9l	4.22249	2	0.121087	0.550788	3'UTR(M),3'UTR(F)	-0.11578	#N/A	#N/A	#N/A
Hinfp	5.80947	3	0.121257	0.551124	3'UTR(M),3'UTR(L)	0.0793325	#N/A	#N/A	#N/A
ENSMUSG00000086797	2.39794	1	0.121495	0.55141	Pseudogene	0.1503	#N/A	#N/A	#N/A
Adcy2	4.21412	2	0.121595	0.55141	3'UTR(M),Intron,3'UTR(F)	-0.0198189	0.744846	0.207391	0.983372
Pex12	2.39548	1	0.121686	0.55141	3'UTR(L),CDS	-0.235573	#N/A	#N/A	#N/A
Immp1l	2.3934	1	0.121848	0.55141	3'UTR(M),3'UTR(F)	0.173421	#N/A	#N/A	#N/A
Orc2	4.20939	2	0.121883	0.55141	3'UTR(M)	-0.0896295	#N/A	#N/A	#N/A
Spopl	4.20804	2	0.121965	0.55141	3'UTR(M)	0.299462	#N/A	#N/A	#N/A
Nle1	2.39062	1	0.122065	0.55141	3'UTR(M),3'UTR(L),3'UTR(F)	0.3495	#N/A	#N/A	#N/A
Kras	2.39033	1	0.122088	0.55141	3'UTR(M),3'UTR(L)	-0.0999244	0.237804	0.282432	0.983372
Samm50	2.38909	1	0.122184	0.551414	3'UTR(M),3'UTR(F)	0.067507	-0.0521154	0.838382	0.987949
Dus1l	2.38492	1	0.122511	0.552402	3'UTR(M),3'UTR(F)	-0.0901736	#N/A	#N/A	#N/A
Ap1s3	2.38384	1	0.122596	0.552402	3'UTR(M),Intron	-0.146661	#N/A	#N/A	#N/A
Add2	4.19227	2	0.122931	0.552945	3'UTR(M),3'UTR(L),CDS,Intron	0.0866608	0.0775563	0.553073	0.983372
Ablim2	4.18924	2	0.123117	0.552945	3'UTR(M),3'UTR(L),3'UTR(F)	-0.0207161	#N/A	#N/A	#N/A
Zfp758	2.37576	1	0.123231	0.552945	3'UTR(M)	0.180115	#N/A	#N/A	#N/A
Smarca1	2.3752	1	0.123276	0.552945	3'UTR(M)	-0.131006	#N/A	#N/A	#N/A
Cerkl	2.37238	1	0.123499	0.552945	3'UTR(M),3'UTR(F)	-0.0906512	#N/A	#N/A	#N/A
ENSMUSG00000085092	4.18245	2	0.123536	0.552945	Pseudogene	0.214764	#N/A	#N/A	#N/A
Pgap2	4.1809	2	0.123631	0.552945	3'UTR(M),3'UTR(F),CDS,Intron	0.0757809	#N/A	#N/A	#N/A
Wipf3	2.36961	1	0.123718	0.552945	3'UTR(M),3'UTR(L),3'UTR(F)	0.0314364	#N/A	#N/A	#N/A
Cers4	5.76251	3	0.123754	0.552945	3'UTR(M),3'UTR(L)	-0.043364	#N/A	#N/A	#N/A
Gria1	2.36894	1	0.123771	0.552945	3'UTR(M),3'UTR(F)	-0.051375	0.161784	0.477123	0.983372
Sh3glb1	7.2392	4	0.123775	0.552945	CDS,Intron	0.00641614	0.241385	0.66536	0.983372
1810062O18Rik	2.36242	1	0.12429	0.554546	ncRNA	0.178282	#N/A	#N/A	#N/A
Zfr2	2.36098	1	0.124404	0.554546	3'UTR(S),Intron	0.0670935	0.777544	0.585338	0.983372
Atg4b	4.16814	2	0.124423	0.554546	3'UTR(M),3'UTR(F),Intron	0.152697	-1.06477	0.308834	0.983372
Ppip5k2	2.35674	1	0.124743	0.555115	3'UTR(M),3'UTR(F)	-0.0250691	#N/A	#N/A	#N/A
Ece1	2.35566	1	0.124829	0.555115	3'UTR(M),3'UTR(L),3'UTR(F)	-0.0867786	#N/A	#N/A	#N/A
BC003965	4.15978	2	0.124944	0.555115	3'UTR(M)	-0.0616489	0.246178	0.58713	0.983372
Rasl10a	2.35325	1	0.125022	0.555115	3'UTR(L),3'UTR(F)	-0.0602974	#N/A	#N/A	#N/A
Bcl9	2.35248	1	0.125084	0.555115	3'UTR(M)	0.082403	#N/A	#N/A	#N/A
Armcx6	2.3519	1	0.12513	0.555115	CDS,3'UTR(F)	-0.295102	#N/A	#N/A	#N/A
Atm	2.34843	1	0.12541	0.555677	3'UTR(M),Intron	-0.144767	3.31244	0.135206	0.983372
Gtf2ird1	2.34623	1	0.125586	0.555677	3'UTR(S),Intron	-0.104964	#N/A	#N/A	#N/A
Myo7a	2.34556	1	0.12564	0.555677	3'UTR(L),3'UTR(F)	0.175679	#N/A	#N/A	#N/A
Abhd5	2.34552	1	0.125644	0.555677	3'UTR(M),3'UTR(F)	-0.0867347	#N/A	#N/A	#N/A
Ubxn1	2.34228	1	0.125905	0.556235	CDS,3'UTR(F)	-0.0658957	#N/A	#N/A	#N/A
Zfp72	2.34155	1	0.125964	0.556235	3'UTR(M),3'UTR(L)	-0.396183	#N/A	#N/A	#N/A
Atrx	2.33968	1	0.126115	0.556477	3'UTR(M),CDS	-0.0292602	0.535197	0.598174	0.983372
Hspa4l	4.13723	2	0.12636	0.55713	3'UTR(M)	-0.00237855	0.152685	0.542046	0.983372
Ssbp1	2.33523	1	0.126476	0.557213	5UTR,3'UTR(F)	-0.205827	#N/A	#N/A	#N/A
Tmem177	2.33247	1	0.126701	0.557775	3'UTR(M),3'UTR(L)	0.219416	0.488037	0.670242	0.983372
Ppp2r2c	2.32637	1	0.127198	0.559536	3'UTR(M)	-0.0911435	#N/A	#N/A	#N/A
Nlgn1	2.32404	1	0.127389	0.559947	3'UTR(M),Intron	-0.0689472	-1.34964	0.106615	0.983372
Snw1	2.32109	1	0.127631	0.560391	3'UTR(M)	-0.0705625	0.27369	0.525642	0.983372
Gm14285	2.32042	1	0.127685	0.560391	ncRNA	0.0848063	#N/A	#N/A	#N/A
Pcnt	2.31894	1	0.127807	0.560463	3'UTR(L),Intron	0.0402402	#N/A	#N/A	#N/A
Uros	2.31674	1	0.127988	0.560463	3'UTR(M)	0.0658996	0.316864	0.480024	0.983372
Smu1	2.31184	1	0.128392	0.560463	3'UTR(M),3'UTR(F)	-0.103947	-1.69808	0.127756	0.983372
Msantd1	2.3099	1	0.128552	0.560463	3'UTR(M),3'UTR(F)	0.1825	#N/A	#N/A	#N/A
Zfp827	2.30926	1	0.128605	0.560463	3'UTR(M),3'UTR(L)	-0.127314	#N/A	#N/A	#N/A
Stambp	4.10186	2	0.128616	0.560463	3'UTR(M),3'UTR(L),CDS,Intron	0.0431844	-0.59694	0.414357	0.983372
Usp33	2.30723	1	0.128773	0.560463	3'UTR(M),Intron	-0.0507087	#N/A	#N/A	#N/A
Iqgap1	2.30709	1	0.128785	0.560463	3'UTR(M)	-0.228352	-0.804991	0.397243	0.983372
Fgfr1op2	2.30682	1	0.128808	0.560463	3'UTR(M),CDS	-0.0800725	0.55958	0.38	0.983372
Hk2	4.0976	2	0.128889	0.560463	5UTR,3'UTR(L),Intron	-0.19781	-2.23786	0.680123	0.98492
Adap2	2.30583	1	0.12889	0.560463	3'UTR(L),3'UTR(F)	0.106818	#N/A	#N/A	#N/A
Rpusd2	2.30501	1	0.128957	0.560463	3'UTR(M)	0.083087	#N/A	#N/A	#N/A
Rasa3	2.30402	1	0.12904	0.560463	3'UTR(M),Intron	-0.00250068	0.609033	0.354054	0.983372
Saal1	4.09299	2	0.129187	0.560463	3'UTR(M),3'UTR(L),3'UTR(F)	-0.247385	#N/A	#N/A	#N/A
Mrps7	4.09289	2	0.129193	0.560463	3'UTR(M),3'UTR(F)	0.0825538	0.141522	0.875834	0.993444
Rexo1	2.30134	1	0.129262	0.560463	3'UTR(M),3'UTR(L)	-0.0701536	#N/A	#N/A	#N/A
Ubxn4	2.30002	1	0.129372	0.560517	3'UTR(M)	0.0799206	0.101182	0.830751	0.987949
Popdc3	2.29496	1	0.129794	0.561061	3'UTR(M),3'UTR(F)	-0.183204	#N/A	#N/A	#N/A
Rnf182	2.29277	1	0.129978	0.561061	3'UTR(M),3'UTR(F)	-0.156347	#N/A	#N/A	#N/A
Gtf2f2	2.29192	1	0.130049	0.561061	3'UTR(M),Intron	-0.0947053	0.414136	0.637549	0.983372
Zfp869	4.07923	2	0.130079	0.561061	3'UTR(M),3'UTR(F)	-0.0162285	#N/A	#N/A	#N/A
Smc3	4.07831	2	0.130139	0.561061	3'UTR(M),CDS,3'UTR(F)	-0.0940164	-0.390729	0.505719	0.983372
Spag4	2.28996	1	0.130213	0.561061	3'UTR(L),CDS,3'UTR(F)	-0.0218081	#N/A	#N/A	#N/A
Dnm3	4.07585	2	0.130298	0.561061	Intron,3'UTR(F)	-0.0959924	-0.033598	0.833046	0.987949
Glb1l	4.07573	2	0.130307	0.561061	3'UTR(M),Intron,3'UTR(F)	-0.00117492	#N/A	#N/A	#N/A
Tmem57	4.07465	2	0.130377	0.561061	3'UTR(M),3'UTR(L),Intron	0.143481	#N/A	#N/A	#N/A
Coq6	2.28401	1	0.130713	0.561941	3'UTR(L),3'UTR(F)	-0.120127	#N/A	#N/A	#N/A
Bclaf1	7.09843	4	0.130777	0.561941	3'UTR(M),3'UTR(F),CDS,Intron	-0.0364959	0.319598	0.557992	0.983372
Notch2	2.28042	1	0.131016	0.562548	3'UTR(M),Intron	0.195359	#N/A	#N/A	#N/A
Rgs9	4.06335	2	0.131116	0.562554	3'UTR(L),Intron,3'UTR(F)	-0.127476	#N/A	#N/A	#N/A
Mrps5	2.27265	1	0.131674	0.564529	3'UTR(M),3'UTR(F)	-0.125123	0.232385	0.801495	0.987949
Lrrc8b	2.26948	1	0.131944	0.565201	3'UTR(M),3'UTR(L)	-0.0970683	#N/A	#N/A	#N/A
Syce2	2.2685	1	0.132028	0.565201	3'UTR(M),3'UTR(L),3'UTR(F)	-0.178132	#N/A	#N/A	#N/A
Galnt14	4.04706	2	0.132188	0.565467	3'UTR(L),Intron,3'UTR(F)	0.0183079	#N/A	#N/A	#N/A
Fcho1	2.26487	1	0.132337	0.565622	3'UTR(M),3'UTR(L)	0.12016	#N/A	#N/A	#N/A
Pcdh1	2.26388	1	0.132421	0.565622	3'UTR(M)	-0.0665328	-0.114637	0.468036	0.983372
Ntan1	2.26002	1	0.132752	0.56613	3'UTR(F),CDS,Intron	-0.252806	#N/A	#N/A	#N/A
Dscam	4.0385	2	0.132755	0.56613	3'UTR(M),3'UTR(L),3'UTR(F)	0.0859838	#N/A	#N/A	#N/A
Trpm2	2.25904	1	0.132836	0.56613	3'UTR(M)	0.0298252	#N/A	#N/A	#N/A
Pnpt1	4.03545	2	0.132958	0.566228	3'UTR(M),3'UTR(F),Intron	-0.182549	0.740591	0.423295	0.983372
Fchsd2	2.2524	1	0.133407	0.566518	3'UTR(M),Intron	-0.156005	#N/A	#N/A	#N/A
Acvr2b	2.25213	1	0.133431	0.566518	3'UTR(L),3'UTR(F)	-0.1344	#N/A	#N/A	#N/A
Tcta	4.02797	2	0.133456	0.566518	3'UTR(M)	0.0228983	#N/A	#N/A	#N/A
Srsf9	2.25085	1	0.133541	0.566518	3'UTR(M)	0.0983622	#N/A	#N/A	#N/A
Cox7a2	2.25066	1	0.133557	0.566518	3'UTR(M),3'UTR(L)	0.0540976	0.0973015	0.463361	0.983372
Slc4a1ap	5.58543	3	0.133617	0.566518	3'UTR(M),3'UTR(F),CDS,Intron	0.110316	0.212163	0.902382	0.995118
Naa30	2.24577	1	0.13398	0.567027	3'UTR(M)	-0.0630125	0.0681283	0.938208	0.997933
Ddx55	4.01923	2	0.13404	0.567027	3'UTR(M),3'UTR(L),3'UTR(F)	-0.0495585	#N/A	#N/A	#N/A
E330033B04Rik	2.24393	1	0.13414	0.567027	ncRNA	0.10847	#N/A	#N/A	#N/A
Ldlrad4	5.57581	3	0.134174	0.567027	3'UTR(M),3'UTR(F),Intron	-0.0437546	#N/A	#N/A	#N/A
H13	4.01516	2	0.134313	0.567027	3'UTR(M),3'UTR(F),Intron	0.174802	#N/A	#N/A	#N/A
Mplkip	4.01492	2	0.13433	0.567027	3'UTR(M),3'UTR(F)	0.259786	#N/A	#N/A	#N/A
Jak1	2.23423	1	0.134984	0.569369	3'UTR(M)	-0.0460298	-0.0120167	0.99178	0.997933
Runx1t1	5.55949	3	0.135123	0.569371	3'UTR(M),3'UTR(L),3'UTR(F)	-0.006238	#N/A	#N/A	#N/A
Gnai1	2.2312	1	0.135249	0.569371	3'UTR(M),Intron	-0.0752332	0.365263	0.417963	0.983372
Rab30	7.01151	4	0.135281	0.569371	3'UTR(M),3'UTR(L),Intron	0.0108739	2.47419	0.293895	0.983372
1810013L24Rik	3.998	2	0.135471	0.569751	3'UTR(M),Intron	-0.0755055	#N/A	#N/A	#N/A
Ap5z1	3.99447	2	0.13571	0.570224	3'UTR(L),3'UTR(F),Intron	0.151019	#N/A	#N/A	#N/A
Man1a	3.99281	2	0.135823	0.570224	3'UTR(L),Intron	-0.0367829	-4.05685	0.0691132	0.983372
Ptges3	2.22382	1	0.135896	0.570224	3'UTR(M)	-0.0627985	0.911839	0.0454922	0.983372
Nsun7	5.54486	3	0.13598	0.570224	3'UTR(L),3'UTR(F),Intron	-0.0238922	#N/A	#N/A	#N/A
Dcaf5	2.22116	1	0.136131	0.57044	3'UTR(M)	0.122007	#N/A	#N/A	#N/A
Map1b	2.21944	1	0.136283	0.570556	3'UTR(M),CDS	-0.0325937	-0.0736348	0.629963	0.983372
Gpr137b-ps	3.98495	2	0.136357	0.570556	Pseudogene	-0.148868	#N/A	#N/A	#N/A
Arl3	2.21591	1	0.136594	0.570889	3'UTR(M),Intron	0.0544639	0.0456801	0.825483	0.987949
Ccdc92	2.21544	1	0.136636	0.570889	3'UTR(M),3'UTR(L)	-0.0665535	0.642888	0.296816	0.983372
Hnrnph3	3.97812	2	0.136824	0.571171	3'UTR(M),3'UTR(L),Intron	-0.0337198	#N/A	#N/A	#N/A
St13	3.97435	2	0.137082	0.571171	3'UTR(M),Intron	-0.0389455	-0.0944399	0.638464	0.983372
Mapk4	2.21023	1	0.137099	0.571171	3'UTR(L),Intron	-0.100409	#N/A	#N/A	#N/A
2510009E07Rik	2.2102	1	0.137101	0.571171	3'UTR(M),3'UTR(L)	0.0630581	#N/A	#N/A	#N/A
Sertad4	3.9726	2	0.137202	0.57118	3'UTR(M),3'UTR(L),Intron	-0.119042	#N/A	#N/A	#N/A
Rbm5	2.20422	1	0.137634	0.572324	3'UTR(M),3'UTR(L),Intron	-0.0706209	#N/A	#N/A	#N/A
Thoc3	2.20284	1	0.137757	0.572324	3'UTR(M),3'UTR(F)	-0.0969458	#N/A	#N/A	#N/A
Usp7	2.20185	1	0.137845	0.572324	3'UTR(M),Intron	-0.0324896	#N/A	#N/A	#N/A
Rab6b	2.20151	1	0.137876	0.572324	3'UTR(M),3'UTR(L),3'UTR(F)	-0.0461352	#N/A	#N/A	#N/A
Zxdc	6.95896	4	0.138073	0.572728	3'UTR(M),CDS,Intron	-0.0271472	#N/A	#N/A	#N/A
Man2a1	2.19803	1	0.138187	0.57279	3'UTR(M),3'UTR(L),Intron	-0.0213008	#N/A	#N/A	#N/A
Dnm1	2.19564	1	0.138402	0.573264	3'UTR(M),3'UTR(L),3'UTR(F)	-0.0277307	-0.100799	0.359954	0.983372
Tdrkh	6.94873	4	0.138622	0.57375	3'UTR(M),Intron	0.0442676	0.144529	0.680639	0.98492
Dph7	2.19212	1	0.138719	0.57375	3'UTR(F),Intron	-0.0950195	#N/A	#N/A	#N/A
Amigo1	3.94885	2	0.138841	0.573785	3'UTR(M),Intron	0.104941	#N/A	#N/A	#N/A
Ift22	3.94762	2	0.138927	0.573785	3'UTR(M),3'UTR(F)	-0.159045	0.0804595	0.805823	0.987949
Telo2	2.18537	1	0.139328	0.575028	3'UTR(M),Intron,3'UTR(F)	-0.0736584	#N/A	#N/A	#N/A
Sel1l	2.18258	1	0.139581	0.57558	3'UTR(M),3'UTR(L)	-0.0476273	0.553694	0.622059	0.983372
2210016F16Rik	2.18044	1	0.139775	0.57558	3'UTR(M),3'UTR(F)	0.162048	1.29202	0.216459	0.983372
Ambra1	3.93463	2	0.139832	0.57558	3'UTR(M),3'UTR(L),3'UTR(F),Intron	-0.0440964	#N/A	#N/A	#N/A
Sash1	2.17947	1	0.139862	0.57558	3'UTR(L),Intron	-0.0852305	0.0391352	0.975293	0.997933
Rrnad1	3.92518	2	0.140494	0.576455	3'UTR(M),3'UTR(L),3'UTR(F)	-0.0898884	#N/A	#N/A	#N/A
Cyb5d2	2.17039	1	0.14069	0.576455	3'UTR(M),3'UTR(L)	0.136687	#N/A	#N/A	#N/A
Fgf14	2.16947	1	0.140775	0.576455	3'UTR(M),3'UTR(L)	0.196591	#N/A	#N/A	#N/A
Paqr8	2.16911	1	0.140808	0.576455	3'UTR(M)	-0.0742042	#N/A	#N/A	#N/A
Dock7	2.16823	1	0.140889	0.576455	3'UTR(M),Intron	-0.265678	0.201034	0.835964	0.987949
Hdac8	3.91479	2	0.141226	0.576455	3'UTR(S),Intron	-0.0546754	#N/A	#N/A	#N/A
Lpin2	2.16448	1	0.141233	0.576455	3'UTR(M),Intron	-0.0770018	#N/A	#N/A	#N/A
Wdr70	6.89792	4	0.141382	0.576455	3'UTR(S),Intron	-0.0332667	#N/A	#N/A	#N/A
Spata2	2.16194	1	0.141466	0.576455	3'UTR(M),3'UTR(L),3'UTR(F)	0.0400844	#N/A	#N/A	#N/A
Casc3	2.16116	1	0.141538	0.576455	3'UTR(L),Intron	-0.0874948	#N/A	#N/A	#N/A
Mapt	2.16017	1	0.141629	0.576455	3'UTR(F),Intron	-0.0547087	0.209033	0.233723	0.983372
Efna2	2.16004	1	0.141641	0.576455	3'UTR(L),3'UTR(F)	-0.162312	#N/A	#N/A	#N/A
Dusp8	2.15968	1	0.141674	0.576455	3'UTR(M),3'UTR(L),3'UTR(F)	-0.0761302	#N/A	#N/A	#N/A
Soga3	2.15797	1	0.141832	0.576455	3'UTR(M),CDS,3'UTR(F)	-0.0741392	-0.325089	0.317699	0.983372
Zfp346	2.15729	1	0.141894	0.576455	3'UTR(M),3'UTR(L)	0.151423	#N/A	#N/A	#N/A
Copz1	2.15627	1	0.141989	0.576455	3'UTR(M),Intron	-0.0753037	6.8793e-05	0.999788	0.999931
Frmd6	2.1559	1	0.142023	0.576455	3'UTR(M),Intron	0.2183	#N/A	#N/A	#N/A
Dcbld1	3.90239	2	0.142104	0.576455	3'UTR(M),Intron	-0.0111612	#N/A	#N/A	#N/A
Raly	3.90065	2	0.142228	0.576455	3'UTR(M),3'UTR(L),3'UTR(F),Intron	-0.0646329	0.668823	0.216455	0.983372
Supt6	2.1527	1	0.14232	0.576455	3'UTR(M),Intron	-0.0801702	1.04195	0.552965	0.983372
Tmem223	2.15119	1	0.14246	0.576455	3'UTR(M),CDS,3'UTR(F)	0.100184	#N/A	#N/A	#N/A
Rarb	2.15088	1	0.142489	0.576455	3'UTR(L),Intron	-0.149112	#N/A	#N/A	#N/A
Creb5	2.15044	1	0.142529	0.576455	3'UTR(L),Intron	0.284615	#N/A	#N/A	#N/A
Mga	5.43563	3	0.14254	0.576455	3'UTR(M),3'UTR(F)	-0.0376011	#N/A	#N/A	#N/A
Fam83h	2.14985	1	0.142584	0.576455	3'UTR(M)	-0.227106	#N/A	#N/A	#N/A
Isoc1	2.14481	1	0.143053	0.577447	3'UTR(L),3'UTR(F)	0.024232	-0.778772	0.147126	0.983372
Nlgn3	5.42706	3	0.143067	0.577447	3'UTR(M),3'UTR(F)	0.0140018	#N/A	#N/A	#N/A
Adamtsl5	2.14398	1	0.14313	0.577447	3'UTR(M),Intron	0.192182	#N/A	#N/A	#N/A
Gtf3c3	2.1424	1	0.143278	0.5775	3'UTR(M)	-0.188218	#N/A	#N/A	#N/A
Prrc2b	3.88121	2	0.143617	0.5775	3'UTR(M),3'UTR(L),Intron	-0.0305321	#N/A	#N/A	#N/A
Hs2st1	6.85583	4	0.143706	0.5775	3'UTR(M),Intron	0.00139216	#N/A	#N/A	#N/A
Taok1	2.13718	1	0.143766	0.5775	3'UTR(M),3'UTR(L)	-0.0514178	0.149916	0.706185	0.987949
Bcl2	2.1358	1	0.143896	0.5775	3'UTR(M),3'UTR(L)	0.0466582	#N/A	#N/A	#N/A
Syt1	2.13513	1	0.143958	0.5775	3'UTR(M),3'UTR(L),Intron	-0.0362032	-0.0276938	0.777019	0.987949
Col4a1	2.13461	1	0.144007	0.5775	3'UTR(M),3'UTR(L)	0.110704	-0.850638	0.368721	0.983372
Pole3	2.13395	1	0.144069	0.5775	3'UTR(M),3'UTR(F)	-0.160445	#N/A	#N/A	#N/A
Ccnc	3.87351	2	0.144171	0.5775	Intron	-0.079419	#N/A	#N/A	#N/A
Glp1r	2.13199	1	0.144253	0.5775	3'UTR(M),3'UTR(L)	-0.146377	#N/A	#N/A	#N/A
Cacna2d2	2.13148	1	0.144301	0.5775	3'UTR(M)	-0.0755685	-0.218635	0.766911	0.987949
Pvt1	3.86954	2	0.144457	0.5775	ncRNA	-0.0881934	#N/A	#N/A	#N/A
Eif4ebp3	2.12928	1	0.144509	0.5775	3'UTR(L),3'UTR(F)	-0.0764356	#N/A	#N/A	#N/A
Sat2	3.86825	2	0.144551	0.5775	3'UTR(M),3'UTR(F),Intron	-0.0442913	#N/A	#N/A	#N/A
Dpy30	2.12177	1	0.145218	0.578762	3'UTR(M),Intron,3'UTR(F)	-0.0568136	0.136623	0.700349	0.987949
Adamts17	2.12168	1	0.145227	0.578762	3'UTR(M),Intron	-0.0545791	#N/A	#N/A	#N/A
Epn2	2.12151	1	0.145243	0.578762	3'UTR(M)	0.07393	0.0429395	0.866822	0.992922
Pdzrn4	3.85832	2	0.14527	0.578762	3'UTR(F),Intron	-0.044805	#N/A	#N/A	#N/A
Aen	2.11835	1	0.145544	0.579126	3'UTR(M)	-0.0574493	#N/A	#N/A	#N/A
1810022K09Rik	2.11814	1	0.145563	0.579126	3'UTR(M),Intron,3'UTR(F)	-0.117415	#N/A	#N/A	#N/A
Mtfmt	2.11693	1	0.145679	0.579186	3'UTR(M),3'UTR(F)	0.252397	#N/A	#N/A	#N/A
Bace2	2.11439	1	0.14592	0.579272	3'UTR(M),3'UTR(F)	-0.221587	#N/A	#N/A	#N/A
Itm2b	2.11383	1	0.145974	0.579272	3'UTR(M)	0.0486253	0.278103	0.594348	0.983372
AI846148	3.84826	2	0.146003	0.579272	3'UTR(M),Intron	0.138177	#N/A	#N/A	#N/A
Trabd	2.1119	1	0.146158	0.579487	3'UTR(M)	0.0846934	#N/A	#N/A	#N/A
Zfp868	2.10857	1	0.146476	0.580347	3'UTR(M),3'UTR(F)	0.275324	#N/A	#N/A	#N/A
Ssb	3.83712	2	0.146818	0.581069	3'UTR(M),CDS,3'UTR(F)	-0.087769	0.431744	0.308608	0.983372
Nsd3	8.17482	5	0.14686	0.581069	3'UTR(M),3'UTR(L),Intron	0.0454962	#N/A	#N/A	#N/A
Tefm	2.10097	1	0.147205	0.581536	3'UTR(M),3'UTR(L),Intron,3'UTR(F)	-0.221435	#N/A	#N/A	#N/A
4933407K13Rik	2.10051	1	0.14725	0.581536	ncRNA	0.0651256	#N/A	#N/A	#N/A
Emp2	2.10018	1	0.147282	0.581536	3'UTR(M),Intron	0.0471246	#N/A	#N/A	#N/A
Hspa13	5.35248	3	0.147733	0.582481	3'UTR(M)	-0.107115	#N/A	#N/A	#N/A
Dot1l	2.09361	1	0.147917	0.582481	3'UTR(M),3'UTR(L)	0.0761192	#N/A	#N/A	#N/A
Hspa1a	2.09267	1	0.148007	0.582481	3'UTR(M),3'UTR(F)	-0.293127	0.0336904	0.840055	0.987949
Hs1bp3	2.0926	1	0.148014	0.582481	3'UTR(M),3'UTR(L),3'UTR(F)	-0.135868	0.961124	0.406197	0.983372
Cops7b	2.09233	1	0.14804	0.582481	3'UTR(M),3'UTR(F)	0.0477947	0.218984	0.660025	0.983372
Reep3	3.8192	2	0.14814	0.582481	3'UTR(M),3'UTR(L),3'UTR(F)	-0.126372	#N/A	#N/A	#N/A
Gpatch4	2.09009	1	0.148257	0.582481	3'UTR(M),CDS,3'UTR(F)	0.0745656	#N/A	#N/A	#N/A
Lpar4	3.8166	2	0.148332	0.582481	3'UTR(M),3'UTR(F),Intron	-0.00657136	#N/A	#N/A	#N/A
Eif2b2	2.08791	1	0.148469	0.582517	3'UTR(F),Intron	0.198899	#N/A	#N/A	#N/A
Cntn5	2.08519	1	0.148733	0.582517	Intron	0.0544358	#N/A	#N/A	#N/A
Prr5l	3.81009	2	0.148816	0.582517	3'UTR(M),3'UTR(L)	-0.154988	#N/A	#N/A	#N/A
Fdx1	2.08403	1	0.148847	0.582517	3'UTR(M)	-0.123188	#N/A	#N/A	#N/A
Senp2	5.33337	3	0.148951	0.582517	3'UTR(M),Intron	-0.0679532	#N/A	#N/A	#N/A
Zfp867	2.08213	1	0.149032	0.582517	3'UTR(M)	0.21029	#N/A	#N/A	#N/A
Kifap3	2.0811	1	0.149133	0.582517	3'UTR(M),CDS	-0.074109	-0.125667	0.813966	0.987949
1700023D09Rik	2.08089	1	0.149153	0.582517	ncRNA	-0.128362	#N/A	#N/A	#N/A
Nipbl	3.80136	2	0.149467	0.583348	3'UTR(M),Intron,3'UTR(F)	-0.0947723	#N/A	#N/A	#N/A
Rad52	3.79897	2	0.149645	0.583424	3'UTR(L),3'UTR(F),Intron	-0.152527	#N/A	#N/A	#N/A
Ythdc2	2.07497	1	0.149733	0.583424	3'UTR(M),3'UTR(L),Intron	-0.227793	#N/A	#N/A	#N/A
Csrnp2	2.07423	1	0.149806	0.583424	3'UTR(L),Intron	-0.059493	#N/A	#N/A	#N/A
Nr4a3	2.07334	1	0.149893	0.583424	3'UTR(M),3'UTR(L)	-0.0212532	#N/A	#N/A	#N/A
Elf2	3.7933	2	0.150071	0.583721	3'UTR(M),Intron	0.0799959	#N/A	#N/A	#N/A
Mdga1	2.06953	1	0.150268	0.583991	3'UTR(L),3'UTR(F)	-0.0716558	-0.219172	0.762557	0.987949
Hemk1	2.06876	1	0.150343	0.583991	3'UTR(M),3'UTR(L),3'UTR(F)	-0.0908437	#N/A	#N/A	#N/A
Rpl11	2.06373	1	0.150841	0.585138	3'UTR(L),3'UTR(F)	-0.238941	-0.201501	0.31055	0.983372
1110065P20Rik	2.06292	1	0.150921	0.585138	3'UTR(M)	-0.0660695	#N/A	#N/A	#N/A
Atxn1l	3.78112	2	0.150987	0.585138	3'UTR(M),3'UTR(L),Intron,3'UTR(F)	-0.0518994	#N/A	#N/A	#N/A
Rfc1	5.30087	3	0.151046	0.585138	3'UTR(M),CDS,3'UTR(F)	-0.111106	#N/A	#N/A	#N/A
Gnal	2.06011	1	0.1512	0.585339	3'UTR(M),3'UTR(L)	0.0518519	2.36023	0.330093	0.983372
Ifit3	2.0574	1	0.151469	0.585985	3'UTR(L),3'UTR(F)	0.105624	#N/A	#N/A	#N/A
Tmem260	5.28218	3	0.152263	0.588661	3'UTR(M),Intron	0.00623053	#N/A	#N/A	#N/A
Ttyh1	2.04521	1	0.152686	0.589883	3'UTR(F),Intron	-0.0298821	-0.00133124	0.995068	0.999082
Ncoa3	3.75745	2	0.152784	0.589883	3'UTR(M),3'UTR(L)	-0.0246942	#N/A	#N/A	#N/A
Fzd9	2.04263	1	0.152945	0.589907	3'UTR(L),3'UTR(F)	-0.0150006	#N/A	#N/A	#N/A
Atf6	3.75356	2	0.153082	0.589907	3'UTR(M),3'UTR(L),Intron	0.0334015	#N/A	#N/A	#N/A
Arsj	2.04071	1	0.153138	0.589907	3'UTR(M),Intron	-0.228594	#N/A	#N/A	#N/A
Cdyl2	3.75075	2	0.153298	0.589907	3'UTR(M),3'UTR(L),Intron	0.0798582	#N/A	#N/A	#N/A
Psg16	2.03844	1	0.153367	0.589907	Intron	0.158499	#N/A	#N/A	#N/A
1700052K11Rik	2.03761	1	0.153451	0.589907	ncRNA	-0.185418	#N/A	#N/A	#N/A
Cntn4	3.74557	2	0.153695	0.589907	3'UTR(M),Intron	-0.0187654	#N/A	#N/A	#N/A
Azin1	2.0347	1	0.153745	0.589907	3'UTR(M)	0.0715655	#N/A	#N/A	#N/A
Nucks1	5.25912	3	0.153777	0.589907	3'UTR(M),CDS	-0.00867687	-2.58643	0.00665321	0.980318
Miga2	2.03346	1	0.15387	0.589907	3'UTR(M),Intron	-0.0251997	-0.340168	0.778024	0.987949
Gria4	5.25695	3	0.15392	0.589907	3'UTR(M),Intron	0.0366205	0.00760281	0.984799	0.997933
Lix1l	2.02931	1	0.154291	0.590933	3'UTR(M),3'UTR(F)	-0.180314	#N/A	#N/A	#N/A
Dclk3	2.02527	1	0.154702	0.591167	3'UTR(L),3'UTR(F)	-0.147629	#N/A	#N/A	#N/A
Rbm33	5.24099	3	0.154978	0.591167	3'UTR(M),3'UTR(L),Intron	-0.0447293	#N/A	#N/A	#N/A
Pde4a	3.72717	2	0.155115	0.591167	3'UTR(M),3'UTR(F)	-0.0664988	0.719143	0.447219	0.983372
Drc3	2.02037	1	0.155201	0.591167	3'UTR(F),Intron	0.531902	#N/A	#N/A	#N/A
Dnm1l	2.02011	1	0.155227	0.591167	3'UTR(M),3'UTR(L)	0.0371445	-0.149511	0.27294	0.983372
Clock	3.72534	2	0.155257	0.591167	3'UTR(M)	-0.0823103	#N/A	#N/A	#N/A
Pank3	3.72493	2	0.155289	0.591167	3'UTR(M),Intron	-0.0270706	#N/A	#N/A	#N/A
Htr5a	2.01931	1	0.15531	0.591167	3'UTR(M),3'UTR(L)	-0.0342032	#N/A	#N/A	#N/A
Spag1	3.72442	2	0.155329	0.591167	5UTR,3'UTR(M),3'UTR(F)	0.191322	#N/A	#N/A	#N/A
Rbm15b	2.01862	1	0.155381	0.591167	3'UTR(M)	0.0685711	#N/A	#N/A	#N/A
Gclm	5.22806	3	0.155839	0.591808	3'UTR(M),3'UTR(F),Intron	0.0515904	0.895003	0.0240839	0.983372
Acrbp	5.22791	3	0.155849	0.591808	3'UTR(L),3'UTR(F),Intron	-0.198147	0.236331	0.526465	0.983372
Nkd2	2.01316	1	0.155941	0.591808	3'UTR(M)	0.192115	#N/A	#N/A	#N/A
AU022252	3.7163	2	0.155961	0.591808	3'UTR(M)	0.0868975	#N/A	#N/A	#N/A
Esrrb	2.00985	1	0.156281	0.592631	3'UTR(L),Intron	0.0226762	#N/A	#N/A	#N/A
Pacrg	2.00712	1	0.156562	0.593304	3'UTR(M),3'UTR(L)	0.0655857	#N/A	#N/A	#N/A
Rabif	2.00373	1	0.156913	0.594058	3'UTR(M)	0.104333	#N/A	#N/A	#N/A
Clmn	3.6999	2	0.157245	0.594058	3'UTR(M),3'UTR(L),3'UTR(F)	-0.0690709	0.419898	0.565453	0.983372
Arfrp1	3.6994	2	0.157284	0.594058	3'UTR(M),3'UTR(F)	-0.08875	#N/A	#N/A	#N/A
Sestd1	2.00007	1	0.157291	0.594058	3'UTR(M)	0.106546	#N/A	#N/A	#N/A
Plekhm1	1.99827	1	0.157479	0.594058	3'UTR(M),3'UTR(L)	0.264609	#N/A	#N/A	#N/A
Ccm2	1.9981	1	0.157496	0.594058	3'UTR(F),Intron	-0.0658431	-0.0552909	0.963226	0.997933
Ebf4	1.99722	1	0.157588	0.594058	3'UTR(F),Intron	-0.0926496	#N/A	#N/A	#N/A
Snx19	1.99722	1	0.157588	0.594058	3'UTR(M)	0.00530549	#N/A	#N/A	#N/A
Zbtb11os1	1.99526	1	0.157792	0.594136	ncRNA	0.143208	#N/A	#N/A	#N/A
Abraxas1	1.9927	1	0.158058	0.594136	3'UTR(M)	0.444873	#N/A	#N/A	#N/A
Snapc3	5.19371	3	0.15815	0.594136	3'UTR(M),Intron,3'UTR(F)	-0.00849297	#N/A	#N/A	#N/A
Engase	1.99065	1	0.158273	0.594136	3'UTR(L),3'UTR(F)	-0.224401	#N/A	#N/A	#N/A
Lage3	1.99049	1	0.15829	0.594136	3'UTR(M),Intron,3'UTR(F)	-0.114155	-0.83031	0.260441	0.983372
Ino80	5.18956	3	0.158432	0.594136	3'UTR(L),Intron,CDS,3'UTR(F)	0.0471011	#N/A	#N/A	#N/A
Gpr135	1.98811	1	0.158538	0.594136	3'UTR(L),3'UTR(F)	-0.202695	#N/A	#N/A	#N/A
Chpf	1.98802	1	0.158548	0.594136	3'UTR(M),3'UTR(F)	0.0596882	#N/A	#N/A	#N/A
Vps9d1	1.98732	1	0.158622	0.594136	3'UTR(M),Intron	-0.0451319	#N/A	#N/A	#N/A
1700020I14Rik	1.98688	1	0.158667	0.594136	ncRNA	-0.0603807	#N/A	#N/A	#N/A
Siglech	1.98543	1	0.15882	0.594136	3'UTR(L),3'UTR(F)	-0.187998	#N/A	#N/A	#N/A
Khk	1.98514	1	0.15885	0.594136	3'UTR(L),3'UTR(F)	-0.171023	#N/A	#N/A	#N/A
Nrip1	1.9834	1	0.159033	0.594365	3'UTR(M)	-0.171486	#N/A	#N/A	#N/A
Ift52	3.67546	2	0.159178	0.594365	3'UTR(M),3'UTR(L),Intron	-0.120174	#N/A	#N/A	#N/A
Tom1	1.98137	1	0.159247	0.594365	3'UTR(F),Intron	-0.150939	-0.110273	0.630682	0.983372
Rer1	1.98062	1	0.159325	0.594365	3'UTR(M),3'UTR(F)	0.12227	-0.39284	0.343592	0.983372
Dnajc5	1.97914	1	0.159481	0.594443	3'UTR(M)	-0.0379296	-0.13	0.641322	0.983372
Zdhhc21	1.97765	1	0.159638	0.594443	3'UTR(M),Intron	-0.148539	#N/A	#N/A	#N/A
Slk	1.97748	1	0.159656	0.594443	3'UTR(M),Intron	0.186829	-0.145169	0.600611	0.983372
Mgmt	1.97509	1	0.159909	0.594717	Intron	-0.284848	#N/A	#N/A	#N/A
Ttll11	3.66554	2	0.15997	0.594717	3'UTR(M),Intron	-0.0304112	1.50898	0.523098	0.983372
Sfmbt1	3.66466	2	0.16004	0.594717	3'UTR(M)	0.0712183	#N/A	#N/A	#N/A
Lnpep	3.66007	2	0.160408	0.594938	3'UTR(L),Intron	0.00748665	#N/A	#N/A	#N/A
Ing2	5.15944	3	0.160488	0.594938	3'UTR(M),3'UTR(F)	0.0257733	#N/A	#N/A	#N/A
Acin1	3.6578	2	0.16059	0.594938	3'UTR(M),3'UTR(L),CDS	0.0344418	-0.48095	0.388529	0.983372
Pabpc1	1.96571	1	0.160904	0.594938	3'UTR(M),5UTR	-0.0527397	0.0170874	0.930128	0.997933
9130011E15Rik	1.96567	1	0.160909	0.594938	3'UTR(L),Intron	-0.0625171	#N/A	#N/A	#N/A
Sccpdh	1.96458	1	0.161024	0.594938	3'UTR(L),3'UTR(F)	-0.0447957	-0.0204911	0.926568	0.997933
Bckdk	1.96374	1	0.161114	0.594938	3'UTR(M),3'UTR(F)	-0.142151	-0.319548	0.682375	0.985607
A230070E04Rik	3.65108	2	0.16113	0.594938	ncRNA	-0.155865	#N/A	#N/A	#N/A
D430040D24Rik	1.96345	1	0.161145	0.594938	ncRNA	-0.240801	#N/A	#N/A	#N/A
Gas2	1.96243	1	0.161254	0.594938	3'UTR(M)	0.164751	#N/A	#N/A	#N/A
Taf9b	1.9622	1	0.161278	0.594938	3'UTR(L),3'UTR(F)	-0.0490641	#N/A	#N/A	#N/A
Reln	1.9616	1	0.161343	0.594938	3'UTR(L),Intron	0.0900267	#N/A	#N/A	#N/A
Dnajc9	1.95699	1	0.161835	0.596255	3'UTR(M)	-0.113775	-1.34966	0.202954	0.983372
Rab39	1.95579	1	0.161964	0.596255	Intron	-0.0643012	#N/A	#N/A	#N/A
Arid2	5.1373	3	0.162015	0.596255	3'UTR(M),CDS,3'UTR(F)	0.1637	#N/A	#N/A	#N/A
Col4a2	1.95439	1	0.162115	0.596255	3'UTR(M),Intron	-0.0582424	-0.149231	0.718063	0.987949
Erc2	5.13168	3	0.162405	0.596484	3'UTR(M),Intron	0.0413828	#N/A	#N/A	#N/A
Terf1	1.95014	1	0.162572	0.596484	3'UTR(M),CDS,3'UTR(F)	-0.189825	#N/A	#N/A	#N/A
Pja2	1.94917	1	0.162676	0.596484	3'UTR(M)	-0.0449879	#N/A	#N/A	#N/A
Grasp	1.94806	1	0.162796	0.596484	3'UTR(M),3'UTR(F)	0.0501174	0.328326	0.726496	0.987949
Fmr1	3.62711	2	0.163074	0.596484	3'UTR(M),Intron	-0.0834888	0.469094	0.344872	0.983372
Dstyk	1.94543	1	0.16308	0.596484	3'UTR(M)	0.0545239	#N/A	#N/A	#N/A
Radil	1.94481	1	0.163147	0.596484	3'UTR(M),3'UTR(F)	-0.195708	#N/A	#N/A	#N/A
Nemf	3.62398	2	0.163329	0.596484	3'UTR(M),CDS,Intron,3'UTR(F)	-0.0583295	0.93674	0.341327	0.983372
Usp20	1.94262	1	0.163384	0.596484	3'UTR(M),3'UTR(L)	-0.228281	#N/A	#N/A	#N/A
Edc3	3.62317	2	0.163395	0.596484	3'UTR(M),3'UTR(F)	-0.0337282	#N/A	#N/A	#N/A
Depdc7	1.94234	1	0.163414	0.596484	3'UTR(L),Intron,3'UTR(F)	-0.18413	#N/A	#N/A	#N/A
Slc35a1	3.62204	2	0.163487	0.596484	3'UTR(M),3'UTR(L),Intron	-0.135577	#N/A	#N/A	#N/A
Gm5148	1.9413	1	0.163527	0.596484	3'UTR(L),Intron	-0.0980507	#N/A	#N/A	#N/A
Rab22a	3.61515	2	0.164051	0.598017	3'UTR(M)	0.139446	1.50524	0.302295	0.983372
Cald1	1.92807	1	0.16497	0.600984	CDS,Intron	0.0708849	-0.351917	0.540575	0.983372
Meaf6	1.9263	1	0.165164	0.601309	3'UTR(M),3'UTR(F)	-0.0770313	#N/A	#N/A	#N/A
Ajap1	1.91895	1	0.165973	0.603871	3'UTR(L),3'UTR(F)	-0.061531	#N/A	#N/A	#N/A
Sema3d	1.91503	1	0.166405	0.605062	3'UTR(M),Intron	-0.203765	#N/A	#N/A	#N/A
Mpc1	1.91396	1	0.166525	0.605113	3'UTR(F),Intron	-0.1338	0.33251	0.234938	0.983372
Ipo13	1.90621	1	0.167385	0.607067	3'UTR(M),3'UTR(F)	-0.0599681	#N/A	#N/A	#N/A
4833422C13Rik	1.90545	1	0.16747	0.607067	ncRNA	-0.0537446	#N/A	#N/A	#N/A
Klhl28	1.90474	1	0.167549	0.607067	3'UTR(M),3'UTR(L),3'UTR(F)	-0.0615129	#N/A	#N/A	#N/A
Galnt10	3.57292	2	0.167552	0.607067	3'UTR(M),Intron	-0.0648648	#N/A	#N/A	#N/A
9430041J12Rik	1.90316	1	0.167725	0.607067	ncRNA	0.188471	#N/A	#N/A	#N/A
Lrrcc1	5.05518	3	0.167801	0.607067	3'UTR(S),Intron	0.0630119	-3.58522	0.150016	0.983372
Ephb1	1.90172	1	0.167886	0.607067	3'UTR(M)	-0.183416	#N/A	#N/A	#N/A
Inpp5d	1.90153	1	0.167908	0.607067	3'UTR(L),Intron	-0.277096	#N/A	#N/A	#N/A
Csrnp3	3.56552	2	0.168173	0.607083	3'UTR(M)	0.0805108	#N/A	#N/A	#N/A
Mars2	3.56523	2	0.168198	0.607083	3'UTR(M),3'UTR(L)	0.0870984	#N/A	#N/A	#N/A
Rab6a	1.89793	1	0.16831	0.607083	3'UTR(M)	-0.0516767	0.179707	0.228269	0.983372
Nktr	1.89736	1	0.168374	0.607083	3'UTR(M),Intron	-0.095542	-0.619066	0.524253	0.983372
Arfgef1	1.89677	1	0.16844	0.607083	3'UTR(M),3'UTR(L)	0.0903542	0.229003	0.73318	0.987949
Ubap2l	3.55897	2	0.168725	0.607727	3'UTR(M),CDS,Intron	-0.0814431	0.222048	0.43186	0.983372
Ak8	1.89289	1	0.168876	0.607891	3'UTR(F),Intron	0.265394	#N/A	#N/A	#N/A
Ttc3	1.889	1	0.169315	0.60819	3'UTR(M),CDS	-0.0610578	-0.0802594	0.950502	0.997933
Sema6a	3.55162	2	0.169346	0.60819	3'UTR(M),3'UTR(L),3'UTR(F)	0.1309	#N/A	#N/A	#N/A
Efcab2	3.55096	2	0.169402	0.60819	5UTR,3'UTR(M)	0.185207	#N/A	#N/A	#N/A
Topors	1.8872	1	0.169518	0.60819	3'UTR(M),CDS	-0.12243	#N/A	#N/A	#N/A
Cask	1.88653	1	0.169594	0.60819	3'UTR(M),3'UTR(L)	0.0495558	-0.150646	0.589607	0.983372
Tmie	1.88592	1	0.169663	0.60819	3'UTR(M)	-0.0661565	#N/A	#N/A	#N/A
Rps27a	1.88559	1	0.1697	0.60819	3'UTR(M),3'UTR(L),3'UTR(F)	0.0864973	-0.120189	0.387397	0.983372
Pank4	1.8826	1	0.170039	0.608974	3'UTR(F),Intron	0.128407	#N/A	#N/A	#N/A
2810021J22Rik	3.54237	2	0.170131	0.608974	3'UTR(M),CDS	0.170138	#N/A	#N/A	#N/A
Ccdc90b	1.8807	1	0.170254	0.609035	3'UTR(F),Intron	0.0855618	-0.0961044	0.888861	0.993444
Ash2l	3.53924	2	0.170398	0.60917	3'UTR(M),3'UTR(F)	-0.026317	#N/A	#N/A	#N/A
Ttc39b	1.87751	1	0.170618	0.609448	3'UTR(M)	-0.149537	#N/A	#N/A	#N/A
Myo5b	1.87502	1	0.170901	0.609448	3'UTR(M),3'UTR(F)	-0.0553994	-4.3556	0.0842489	0.983372
Gpr68	1.87486	1	0.17092	0.609448	3'UTR(L),3'UTR(F)	-0.177658	#N/A	#N/A	#N/A
Alg6	1.87437	1	0.170976	0.609448	3'UTR(M),3'UTR(L),3'UTR(F)	-0.178979	#N/A	#N/A	#N/A
9330159F19Rik	3.53211	2	0.171006	0.609448	3'UTR(M),3'UTR(F),Intron	-0.0774474	-0.280377	0.927467	0.997933
Dok7	1.872	1	0.171246	0.609925	3'UTR(L),Intron	-0.0759001	#N/A	#N/A	#N/A
Trappc13	3.5248	2	0.171632	0.610806	3'UTR(M)	0.022284	1.16164	0.145978	0.983372
Helz	1.86736	1	0.171778	0.610806	3'UTR(L),3'UTR(F)	-0.0821626	#N/A	#N/A	#N/A
Rhoa	1.86601	1	0.171932	0.610806	3'UTR(M)	0.0606879	0.324087	0.0775909	0.983372
Sox8	3.52035	2	0.172015	0.610806	3'UTR(M),3'UTR(L),Intron,3'UTR(F)	-0.0402437	#N/A	#N/A	#N/A
E230016M11Rik	1.86521	1	0.172025	0.610806	ncRNA	0.21875	#N/A	#N/A	#N/A
Twist2	1.86401	1	0.172162	0.610916	3'UTR(M),3'UTR(L),Intron	0.0917711	#N/A	#N/A	#N/A
Med9	3.51493	2	0.172482	0.611671	3'UTR(M),3'UTR(L),3'UTR(F)	0.056067	#N/A	#N/A	#N/A
Prmt3	3.51322	2	0.172629	0.611818	3'UTR(M),3'UTR(L)	0.0145945	#N/A	#N/A	#N/A
Lingo2	3.51041	2	0.172872	0.612299	Intron,3'UTR(F)	-0.0860367	#N/A	#N/A	#N/A
Trp53rkb	3.50883	2	0.173008	0.612336	3'UTR(M),3'UTR(F),Intron	0.124595	#N/A	#N/A	#N/A
Tfdp2	1.85593	1	0.173096	0.612336	3'UTR(M)	0.0758555	#N/A	#N/A	#N/A
Sirt6	1.84757	1	0.174067	0.615393	3'UTR(L),3'UTR(F)	0.0994557	#N/A	#N/A	#N/A
Atp11a	1.84338	1	0.174555	0.61674	3'UTR(M),Intron	-0.0682775	#N/A	#N/A	#N/A
Racgap1	1.84102	1	0.174832	0.61687	3'UTR(M),Intron	0.0819162	#N/A	#N/A	#N/A
Zhx3	1.84076	1	0.174862	0.61687	3'UTR(M)	-0.0928907	#N/A	#N/A	#N/A
Wbp11	1.83902	1	0.175066	0.61687	3'UTR(M),3'UTR(L),Intron	-0.040882	#N/A	#N/A	#N/A
Unc13d	3.48477	2	0.175102	0.61687	3'UTR(M),Intron	-0.124551	#N/A	#N/A	#N/A
Gins3	3.48447	2	0.175129	0.61687	3'UTR(M),Intron	-0.0941342	#N/A	#N/A	#N/A
Zmym4	3.48197	2	0.175347	0.616925	3'UTR(M),Intron	0.0928385	#N/A	#N/A	#N/A
Phldb2	1.83509	1	0.175527	0.616925	3'UTR(M),Intron	-0.00955254	#N/A	#N/A	#N/A
Mbd2	1.83476	1	0.175566	0.616925	3'UTR(M),3'UTR(L)	0.0972504	#N/A	#N/A	#N/A
Sertad2	4.94822	3	0.175628	0.616925	3'UTR(M),Intron	0.0771245	#N/A	#N/A	#N/A
Prelp	1.83378	1	0.175681	0.616925	3'UTR(M),3'UTR(F)	-0.0221514	#N/A	#N/A	#N/A
Mrs2	3.47673	2	0.175808	0.616977	3'UTR(M),3'UTR(F)	0.0967107	#N/A	#N/A	#N/A
Nap1l1	3.47494	2	0.175965	0.616977	3'UTR(M),3'UTR(F),Intron	0.119896	-0.119252	0.556124	0.983372
Klf13	1.82891	1	0.176256	0.616977	3'UTR(M),3'UTR(L)	-0.042431	#N/A	#N/A	#N/A
Dhfr	3.47091	2	0.17632	0.616977	3'UTR(M),3'UTR(F)	0.0936607	#N/A	#N/A	#N/A
Trim11	1.82829	1	0.17633	0.616977	3'UTR(M),3'UTR(F),Intron	-0.0934805	#N/A	#N/A	#N/A
Ncoa1	1.8282	1	0.17634	0.616977	3'UTR(M),3'UTR(L),3'UTR(F)	0.0881461	#N/A	#N/A	#N/A
Ccdc136	3.46668	2	0.176693	0.617834	3'UTR(M),3'UTR(L),3'UTR(F),Intron	-0.0785417	#N/A	#N/A	#N/A
Srsf6	1.82249	1	0.177018	0.618308	3'UTR(M)	0.0648671	0.746802	0.120219	0.983372
Mief1	1.82227	1	0.177044	0.618308	3'UTR(M)	-0.117365	#N/A	#N/A	#N/A
Kcnip4	3.46012	2	0.177274	0.618418	3'UTR(L),Intron	-0.0535719	-0.472233	0.262505	0.983372
Sfswap	3.45993	2	0.177291	0.618418	3'UTR(L),3'UTR(F),Intron	0.0167441	#N/A	#N/A	#N/A
Abca8b	1.81755	1	0.177605	0.618834	3'UTR(M),Intron	-0.0244167	#N/A	#N/A	#N/A
Dbx2	1.81738	1	0.177625	0.618834	3'UTR(M),3'UTR(L)	-0.0943847	#N/A	#N/A	#N/A
Tmem19	3.45466	2	0.177758	0.618867	3'UTR(M),3'UTR(F)	0.143262	#N/A	#N/A	#N/A
Srrm2	1.8155	1	0.17785	0.618867	3'UTR(L),CDS	-0.0455972	0.641068	0.0828027	0.983372
Cflar	1.81252	1	0.178206	0.619731	3'UTR(M),Intron	0.184749	#N/A	#N/A	#N/A
Gpc5	3.4476	2	0.178387	0.619985	3'UTR(L),Intron	-0.0120131	0.29732	0.691155	0.986925
Tcea2	3.44625	2	0.178508	0.620028	3'UTR(M),3'UTR(L),3'UTR(F)	0.0183535	#N/A	#N/A	#N/A
Spock2	3.44274	2	0.178821	0.620741	3'UTR(M),Intron	-0.106524	1.01351	0.0116476	0.983372
Fbxo7	1.80457	1	0.179161	0.621544	3'UTR(M),3'UTR(F)	0.0541856	0.090664	0.845687	0.987949
Vcpip1	3.43736	2	0.179303	0.621663	3'UTR(M)	-0.00649992	-0.117543	0.725131	0.987949
Lig3	1.80229	1	0.179435	0.621747	3'UTR(M)	0.0752456	#N/A	#N/A	#N/A
Gpr27	1.80044	1	0.179659	0.621889	3'UTR(M),3'UTR(L)	-0.059276	#N/A	#N/A	#N/A
Cdh18	1.79978	1	0.179739	0.621889	3'UTR(M),3'UTR(L),3'UTR(F)	-0.132916	#N/A	#N/A	#N/A
4921504A21Rik	1.79925	1	0.179803	0.621889	ncRNA	0.0266787	#N/A	#N/A	#N/A
C87436	1.79837	1	0.179909	0.621889	3'UTR(L),3'UTR(F),Intron	-0.296495	#N/A	#N/A	#N/A
Cacnb4	3.42641	2	0.180287	0.622463	3'UTR(M),3'UTR(L),3'UTR(F)	-0.0665421	0.161939	0.547308	0.983372
Bmp2k	3.42635	2	0.180292	0.622463	3'UTR(M),3'UTR(L),Intron	0.00615365	#N/A	#N/A	#N/A
B230219D22Rik	3.42295	2	0.180599	0.623148	3'UTR(M),3'UTR(F)	0.03522	#N/A	#N/A	#N/A
Cebpz	4.87913	3	0.180865	0.62369	3'UTR(M),CDS,Intron	0.0212543	#N/A	#N/A	#N/A
Dcun1d4	1.78785	1	0.181189	0.624108	3'UTR(M),Intron	0.0896113	#N/A	#N/A	#N/A
Frmpd4	1.78768	1	0.181209	0.624108	Intron	-0.0691268	#N/A	#N/A	#N/A
Rhobtb3	1.78684	1	0.181312	0.624108	3'UTR(L),Intron	-0.130982	#N/A	#N/A	#N/A
Peak1	4.86876	3	0.181664	0.624945	3'UTR(M),3'UTR(L),Intron	0.07739	#N/A	#N/A	#N/A
Atf7	3.40769	2	0.181982	0.625657	Intron	0.029687	#N/A	#N/A	#N/A
Eny2	1.78049	1	0.182089	0.625657	3'UTR(M),CDS,3'UTR(F)	0.141997	#N/A	#N/A	#N/A
Svbp	1.77941	1	0.182222	0.625741	CDS,3'UTR(F)	0.209017	#N/A	#N/A	#N/A
Plod1	1.77635	1	0.182598	0.626659	3'UTR(M),Intron	-0.10793	#N/A	#N/A	#N/A
Peli2	4.85353	3	0.182842	0.62712	3'UTR(M),3'UTR(F),Intron	-0.00511984	#N/A	#N/A	#N/A
Zfp839	1.7723	1	0.183097	0.627376	3'UTR(M)	0.0766	#N/A	#N/A	#N/A
Pip5k1a	3.39362	2	0.183267	0.627376	3'UTR(M),Intron	-0.039145	1.3295	0.24598	0.983372
BC005561	1.76913	1	0.18349	0.627376	CDS	-0.0416929	#N/A	#N/A	#N/A
Wdr59	3.39046	2	0.183557	0.627376	3'UTR(M)	-0.0185894	#N/A	#N/A	#N/A
Rala	3.38978	2	0.18362	0.627376	3'UTR(L),CDS,3'UTR(F)	0.00217634	-0.0518829	0.714467	0.987949
Ykt6	1.76743	1	0.1837	0.627376	3'UTR(M),3'UTR(F)	0.0960433	0.179626	0.365207	0.983372
Agl	1.76698	1	0.183756	0.627376	3'UTR(M)	-0.300405	0.126302	0.650293	0.983372
Mad1l1	3.38782	2	0.183799	0.627376	3'UTR(S),Intron	0.0828111	1.48847	0.535309	0.983372
Usf2	1.76582	1	0.183901	0.627376	3'UTR(M),3'UTR(L)	-0.0288192	#N/A	#N/A	#N/A
Rrbp1	3.38555	2	0.184008	0.627376	3'UTR(M),CDS,3'UTR(F)	-0.0329103	-0.0207611	0.984314	0.997933
Fam49b	1.76289	1	0.184264	0.627645	3'UTR(M),3'UTR(L)	-0.0691796	#N/A	#N/A	#N/A
Eml4	3.38222	2	0.184315	0.627645	3'UTR(M),Intron	-0.0217388	-0.453021	0.539841	0.983372
Mir5098	3.37983	2	0.184535	0.627645	ncRNA	0.188898	#N/A	#N/A	#N/A
Ntf3	1.75896	1	0.184754	0.627645	3'UTR(L),Intron	-0.264895	#N/A	#N/A	#N/A
Matn4	1.75814	1	0.184857	0.627645	3'UTR(L),3'UTR(F)	0.125713	#N/A	#N/A	#N/A
Cdan1	1.75789	1	0.184888	0.627645	3'UTR(M),Intron	0.204788	#N/A	#N/A	#N/A
Htra1	1.75746	1	0.184941	0.627645	3'UTR(M),3'UTR(F),Intron	0.110554	-1.06396	0.308189	0.983372
Gigyf2	1.7573	1	0.184961	0.627645	3'UTR(M),Intron	-0.0682114	#N/A	#N/A	#N/A
Pdlim7	1.75088	1	0.185766	0.627951	Intron	-0.104716	#N/A	#N/A	#N/A
Ski	1.74977	1	0.185905	0.627951	3'UTR(M),3'UTR(L)	0.0491889	#N/A	#N/A	#N/A
Btf3l4	3.36483	2	0.185925	0.627951	3'UTR(M),3'UTR(F)	-0.0333376	-0.281994	0.336295	0.983372
Sppl2a	4.81295	3	0.186017	0.627951	3'UTR(M),Intron	-0.228547	#N/A	#N/A	#N/A
Cab39	1.74838	1	0.186081	0.627951	3'UTR(M)	-0.128257	-0.0733557	0.72499	0.987949
Dennd6a	1.74753	1	0.186188	0.627951	3'UTR(M),Intron	-0.0981344	#N/A	#N/A	#N/A
Gstm7	1.747	1	0.186255	0.627951	3'UTR(L),3'UTR(F)	0.124896	0.0991239	0.946514	0.997933
Ddx19a	1.74687	1	0.186271	0.627951	3'UTR(M),3'UTR(L)	-0.0650391	0.119918	0.828567	0.987949
Sgpp1	1.74662	1	0.186302	0.627951	3'UTR(L),Intron	-0.116329	#N/A	#N/A	#N/A
Ift172	1.74641	1	0.186328	0.627951	3'UTR(M),3'UTR(F)	-0.0974616	#N/A	#N/A	#N/A
Alg8	1.74616	1	0.18636	0.627951	3'UTR(M),3'UTR(F)	0.469957	#N/A	#N/A	#N/A
Pmf1	1.74614	1	0.186363	0.627951	3'UTR(M)	0.212116	#N/A	#N/A	#N/A
Trim45	1.74492	1	0.186516	0.628098	Intron	-0.228036	#N/A	#N/A	#N/A
Zbtb17	1.7412	1	0.186986	0.628587	3'UTR(M),3'UTR(L),3'UTR(F)	0.148547	#N/A	#N/A	#N/A
Fbxo16	1.74093	1	0.187022	0.628587	3'UTR(M),3'UTR(F)	-0.385404	#N/A	#N/A	#N/A
Fcgr1	1.74029	1	0.187102	0.628587	3'UTR(M),3'UTR(L),3'UTR(F)	0.0632184	#N/A	#N/A	#N/A
Nab1	1.73947	1	0.187207	0.628587	3'UTR(M)	-0.131826	#N/A	#N/A	#N/A
Mrpl35	4.7979	3	0.187208	0.628587	3'UTR(M),CDS	-0.0139718	#N/A	#N/A	#N/A
Dis3l2	1.73821	1	0.187366	0.628749	3'UTR(M),3'UTR(L)	-0.0224103	0.390429	0.511643	0.983372
Ggnbp2	1.73721	1	0.187493	0.628807	3'UTR(M),CDS	0.0618731	#N/A	#N/A	#N/A
Senp1	3.34486	2	0.18779	0.629435	3'UTR(M),Intron	0.0870557	#N/A	#N/A	#N/A
Hmgcl	1.73331	1	0.187989	0.629439	5UTR,3'UTR(L),3'UTR(F)	0.0992574	-0.711225	0.0394548	0.983372
Tbl2	3.34252	2	0.18801	0.629439	3'UTR(M),3'UTR(F)	-0.161609	0.478418	0.502146	0.983372
Zfp652	1.73139	1	0.188233	0.629475	3'UTR(M)	0.0661032	#N/A	#N/A	#N/A
Sntg1	3.34008	2	0.18824	0.629475	3'UTR(M),3'UTR(L),Intron	0.0619839	#N/A	#N/A	#N/A
Camkmt	3.3377	2	0.188464	0.629637	3'UTR(F),Intron	0.154795	#N/A	#N/A	#N/A
Nsmce2	3.33724	2	0.188507	0.629637	CDS,Intron	0.0139279	#N/A	#N/A	#N/A
Zfp619	1.72824	1	0.188636	0.629648	3'UTR(M)	-0.103914	#N/A	#N/A	#N/A
Tmx1	1.7275	1	0.18873	0.629648	3'UTR(M)	-0.0864853	-0.913347	0.0449528	0.983372
Rcor1	1.72599	1	0.188924	0.629929	3'UTR(M)	0.126104	#N/A	#N/A	#N/A
Memo1	1.72249	1	0.189372	0.630108	3'UTR(M)	0.0832292	-0.868488	0.532784	0.983372
Rc3h1	1.72175	1	0.189468	0.630108	3'UTR(M),Intron	0.155029	#N/A	#N/A	#N/A
Leprotl1	1.72152	1	0.189498	0.630108	3'UTR(M),3'UTR(L)	-0.0504725	#N/A	#N/A	#N/A
Zfp710	1.72049	1	0.189629	0.630108	3'UTR(L),Intron	0.102344	#N/A	#N/A	#N/A
Klf12	1.72006	1	0.189685	0.630108	3'UTR(M),3'UTR(L)	-0.134493	#N/A	#N/A	#N/A
Tbce	1.71621	1	0.190181	0.630108	3'UTR(S),Intron	-0.0550066	1.21022	0.196339	0.983372
Zfp46	1.71578	1	0.190237	0.630108	3'UTR(M),3'UTR(F)	-0.121006	#N/A	#N/A	#N/A
Bola2	1.7148	1	0.190364	0.630108	3'UTR(L),CDS	0.0706698	0.410989	0.179064	0.983372
Yaf2	3.31431	2	0.190681	0.630108	3'UTR(M),Intron	0.0182461	#N/A	#N/A	#N/A
Rnaseh2a	3.31365	2	0.190743	0.630108	3'UTR(M),3'UTR(L),CDS,3'UTR(F)	0.056389	#N/A	#N/A	#N/A
Wdr73	1.71135	1	0.19081	0.630108	3'UTR(M)	0.110051	#N/A	#N/A	#N/A
Larp7	3.31281	2	0.190823	0.630108	3'UTR(M),3'UTR(L),CDS,3'UTR(F)	-0.129739	-1.75036	0.118674	0.983372
Aaed1	3.31102	2	0.190995	0.630108	3'UTR(M),Intron	0.106442	#N/A	#N/A	#N/A
Arhgef3	1.70959	1	0.191038	0.630108	3'UTR(M),Intron	0.0971467	#N/A	#N/A	#N/A
Shisa4	1.70913	1	0.191098	0.630108	3'UTR(M),Intron	0.0512457	3.25334	0.210845	0.983372
Ints6	4.74903	3	0.191124	0.630108	3'UTR(F),Intron	-0.0930424	#N/A	#N/A	#N/A
Tnks2	1.70876	1	0.191146	0.630108	3'UTR(M)	0.0663961	#N/A	#N/A	#N/A
Asap1	3.30931	2	0.191158	0.630108	3'UTR(M),Intron	-0.0674752	0.127537	0.694667	0.987949
Rbx1	4.74858	3	0.191161	0.630108	3'UTR(M),3'UTR(F),Intron	0.00672503	-0.13801	0.637988	0.983372
Nrg2	1.70857	1	0.191171	0.630108	3'UTR(M),3'UTR(L)	-0.110205	#N/A	#N/A	#N/A
Abhd17c	1.70598	1	0.191507	0.630506	3'UTR(L),Intron	-0.0383482	#N/A	#N/A	#N/A
Rpp40	1.70559	1	0.191559	0.630506	3'UTR(L),3'UTR(F)	0.257489	#N/A	#N/A	#N/A
Srp9	1.70511	1	0.191621	0.630506	3'UTR(M),3'UTR(F)	-0.0758131	-0.479257	0.222219	0.983372
B3gat2	1.70205	1	0.19202	0.631455	3'UTR(L),3'UTR(F)	0.0800719	#N/A	#N/A	#N/A
Idh3a	1.70068	1	0.192199	0.631683	3'UTR(M)	0.050855	0.0225225	0.826747	0.987949
Dusp16	1.69757	1	0.192607	0.631961	3'UTR(L),Intron	0.209532	#N/A	#N/A	#N/A
Rfxank	1.69693	1	0.19269	0.631961	3'UTR(M),3'UTR(L),3'UTR(F)	-0.119021	#N/A	#N/A	#N/A
Gm7854	1.69662	1	0.192731	0.631961	ncRNA	-0.0423868	#N/A	#N/A	#N/A
Frrs1	4.72897	3	0.192754	0.631961	3'UTR(M),Intron	-0.0405124	#N/A	#N/A	#N/A
Fam185a	1.69584	1	0.192833	0.631961	3'UTR(M),3'UTR(L)	0.144597	#N/A	#N/A	#N/A
Gle1	1.69102	1	0.193467	0.633675	3'UTR(M),3'UTR(F)	-0.0850634	#N/A	#N/A	#N/A
Sf3b2	1.68836	1	0.193817	0.634244	3'UTR(M),3'UTR(L),CDS	-0.104438	#N/A	#N/A	#N/A
Tapbp	1.68724	1	0.193966	0.634244	3'UTR(M),3'UTR(F)	-0.122012	#N/A	#N/A	#N/A
Ago2	3.28009	2	0.193972	0.634244	3'UTR(M),3'UTR(L)	-0.102795	#N/A	#N/A	#N/A
Slc25a44	1.68445	1	0.194334	0.635068	3'UTR(M),3'UTR(L)	-0.0496116	#N/A	#N/A	#N/A
Clip4	1.68358	1	0.194449	0.635083	Intron	0.0689091	#N/A	#N/A	#N/A
Zfp862-ps	1.68044	1	0.194867	0.636084	Pseudogene	-0.277245	#N/A	#N/A	#N/A
Alg14	3.26747	2	0.195199	0.636249	3'UTR(M),3'UTR(F)	0.145878	#N/A	#N/A	#N/A
ENSMUSG00000090998	1.6776	1	0.195243	0.636249	Pseudogene	0.204861	#N/A	#N/A	#N/A
Trpc5	4.69855	3	0.195249	0.636249	3'UTR(M),3'UTR(L),Intron	-0.0727644	#N/A	#N/A	#N/A
Etfrf1	1.67642	1	0.195401	0.636382	3'UTR(M)	0.116428	#N/A	#N/A	#N/A
Fbxo31	1.67386	1	0.195742	0.636934	3'UTR(M),3'UTR(L)	0.0564506	#N/A	#N/A	#N/A
Mgll	1.67349	1	0.195792	0.636934	3'UTR(M),3'UTR(F)	-0.0367915	-0.0218975	0.934211	0.997933
Rab27a	1.67177	1	0.196022	0.637263	3'UTR(M),Intron	-0.14135	#N/A	#N/A	#N/A
Stard7	1.67107	1	0.196115	0.637263	3'UTR(M),Intron	0.0534609	#N/A	#N/A	#N/A
Samd8	1.6688	1	0.196419	0.63789	3'UTR(M),3'UTR(L)	-0.133084	#N/A	#N/A	#N/A
Ppp4r1l-ps	8.61199	6	0.196604	0.638129	Pseudogene	0.00421149	#N/A	#N/A	#N/A
Sugp2	1.66574	1	0.19683	0.63839	3'UTR(M),3'UTR(F)	0.0419513	#N/A	#N/A	#N/A
Itgb1bp1	3.25005	2	0.196906	0.63839	3'UTR(M)	-0.108492	#N/A	#N/A	#N/A
Mcph1	3.24563	2	0.197343	0.639232	3'UTR(M),3'UTR(L)	-0.161926	#N/A	#N/A	#N/A
Lims1	1.66123	1	0.197437	0.639232	3'UTR(M),CDS	-0.210641	#N/A	#N/A	#N/A
Astn2	1.66077	1	0.1975	0.639232	3'UTR(M),Intron	0.389776	1.4041	0.374278	0.983372
Zfp638	1.65724	1	0.197976	0.639758	CDS,3'UTR(F)	0.218854	-0.765134	0.454461	0.983372
Esyt2	4.66495	3	0.19804	0.639758	3'UTR(M),3'UTR(L),Intron	0.00983518	0.530439	0.209814	0.983372
Plcl2	3.23741	2	0.198155	0.639758	3'UTR(M),3'UTR(L),3'UTR(F)	0.00630113	#N/A	#N/A	#N/A
Sav1	1.65568	1	0.198187	0.639758	3'UTR(M),3'UTR(F)	-0.138604	#N/A	#N/A	#N/A
Gsap	1.65545	1	0.198219	0.639758	3'UTR(M)	0.114094	#N/A	#N/A	#N/A
Usp53	1.65191	1	0.1987	0.640386	3'UTR(M)	-0.241755	#N/A	#N/A	#N/A
Ptcd1	1.65101	1	0.198822	0.640386	3'UTR(M),3'UTR(F)	0.162614	#N/A	#N/A	#N/A
Ttbk1	3.23007	2	0.198884	0.640386	3'UTR(M),Intron	-0.0266488	1.57107	0.314681	0.983372
Klf5	1.64976	1	0.198991	0.640386	3'UTR(M),3'UTR(L),3'UTR(F)	-0.0833767	#N/A	#N/A	#N/A
Rchy1	3.22828	2	0.199062	0.640386	3'UTR(M)	-0.123447	#N/A	#N/A	#N/A
Cntnap5b	5.99958	4	0.19918	0.640386	3'UTR(M),3'UTR(L),Intron	0.0387149	#N/A	#N/A	#N/A
Lrrc58	1.6468	1	0.199395	0.640386	3'UTR(M),Intron	-0.142676	#N/A	#N/A	#N/A
2900089D17Rik	1.64655	1	0.199429	0.640386	ncRNA	-0.360456	#N/A	#N/A	#N/A
Appbp2	1.64625	1	0.19947	0.640386	3'UTR(M)	-0.0641492	#N/A	#N/A	#N/A
St8sia6	1.64495	1	0.199648	0.640386	3'UTR(L),Intron	0.183988	#N/A	#N/A	#N/A
Mtmr7	3.2214	2	0.199747	0.640386	3'UTR(M)	0.0730162	-0.670437	0.437679	0.983372
Avl9	3.21961	2	0.199926	0.640386	3'UTR(M),Intron	-0.00731471	-0.0389643	0.894986	0.994478
Cdc25a	3.21721	2	0.200166	0.640386	3'UTR(M),3'UTR(F)	-0.194665	4.21739	0.0778032	0.983372
Megf9	3.2161	2	0.200278	0.640386	3'UTR(M),Intron	-0.0405558	#N/A	#N/A	#N/A
Pdgfa	1.63992	1	0.200337	0.640386	3'UTR(M),3'UTR(F)	0.0300974	#N/A	#N/A	#N/A
Cdc25b	1.63913	1	0.200445	0.640386	3'UTR(M),Intron	0.0727723	#N/A	#N/A	#N/A
Depdc5	1.63913	1	0.200445	0.640386	3'UTR(M),3'UTR(F)	0.0545459	#N/A	#N/A	#N/A
Zswim1	1.63873	1	0.2005	0.640386	3'UTR(F),Intron	0.0881728	#N/A	#N/A	#N/A
Frg2f1	1.6385	1	0.200532	0.640386	Intron	0.0173665	#N/A	#N/A	#N/A
Zfp729a	3.21101	2	0.200789	0.640403	3'UTR(M),3'UTR(L),3'UTR(F)	-0.313576	#N/A	#N/A	#N/A
2610021A01Rik	3.21084	2	0.200805	0.640403	3'UTR(M)	0.180155	#N/A	#N/A	#N/A
Socs6	1.63497	1	0.201018	0.640403	3'UTR(M)	-0.0183695	#N/A	#N/A	#N/A
Hnrnpab	1.63483	1	0.201036	0.640403	3'UTR(M)	0.0600382	0.0991791	0.683263	0.986028
Trub2	3.20615	2	0.201277	0.640403	3'UTR(M)	0.0414697	#N/A	#N/A	#N/A
Nek6	3.2061	2	0.201282	0.640403	3'UTR(M)	-0.0185531	#N/A	#N/A	#N/A
Gm19299	1.63156	1	0.201487	0.640403	ncRNA	-0.285904	#N/A	#N/A	#N/A
Zfp668	3.20356	2	0.201537	0.640403	3'UTR(M),3'UTR(F)	-0.229543	#N/A	#N/A	#N/A
Ppm1e	1.63118	1	0.20154	0.640403	3'UTR(M),3'UTR(L),Intron	-0.0466951	#N/A	#N/A	#N/A
A830082K12Rik	1.62912	1	0.201825	0.640603	ncRNA	0.198197	#N/A	#N/A	#N/A
Nfix	1.62763	1	0.202031	0.640603	3'UTR(M),3'UTR(F)	-0.0403455	0.47257	0.662769	0.983372
Tspan15	1.62647	1	0.202192	0.640603	3'UTR(M),3'UTR(L)	0.197622	0.826842	0.312774	0.983372
Poln	3.1954	2	0.202362	0.640603	3'UTR(S),Intron	0.174168	#N/A	#N/A	#N/A
Map2k7	1.62514	1	0.202377	0.640603	3'UTR(L),3'UTR(F),Intron	0.0706242	0.71825	0.353721	0.983372
Naa40	3.19522	2	0.202379	0.640603	3'UTR(M),Intron	-0.0311878	#N/A	#N/A	#N/A
A430035B10Rik	1.62509	1	0.202384	0.640603	ncRNA	-0.186514	#N/A	#N/A	#N/A
Cbl	1.62369	1	0.202578	0.640865	3'UTR(M),3'UTR(L),Intron	0.0863425	0.326692	0.552459	0.983372
Tcf7l1	1.62218	1	0.202788	0.64096	3'UTR(L),3'UTR(F)	-0.114316	#N/A	#N/A	#N/A
Psmd7	1.62187	1	0.202831	0.64096	3'UTR(M),3'UTR(L),CDS,3'UTR(F)	0.0619329	-0.162724	0.540102	0.983372
Yipf4	1.62096	1	0.202958	0.641008	3'UTR(M)	-0.039265	#N/A	#N/A	#N/A
Lrrc4c	1.61643	1	0.20359	0.642	3'UTR(M),3'UTR(F)	-0.0361979	#N/A	#N/A	#N/A
Zfp87	1.61635	1	0.203602	0.642	3'UTR(M),Intron	0.265423	#N/A	#N/A	#N/A
Gm15440	1.61519	1	0.203764	0.642	3'UTR(M)	-0.116166	#N/A	#N/A	#N/A
Cep95	5.93741	4	0.203871	0.642	CDS,Intron	0.0821016	#N/A	#N/A	#N/A
Ctnnd2	1.6137	1	0.203973	0.642	3'UTR(M),Intron	0.0485834	0.149346	0.548167	0.983372
Tmem38a	1.61291	1	0.204083	0.642	3'UTR(M)	-0.0539692	-1.20386	0.362988	0.983372
Lrrc8d	3.17744	2	0.204186	0.642	3'UTR(M),3'UTR(F),Intron	0.02363	#N/A	#N/A	#N/A
Wdr60	3.17698	2	0.204233	0.642	3'UTR(M),CDS,3'UTR(F)	-0.0319867	#N/A	#N/A	#N/A
Derl2	1.61136	1	0.204301	0.642	3'UTR(M)	0.147783	-0.211615	0.656004	0.983372
Akirin2	5.93062	4	0.20439	0.642	3'UTR(M),3'UTR(F)	-0.0226114	#N/A	#N/A	#N/A
E330009J07Rik	1.60951	1	0.204561	0.642186	3'UTR(L),Intron	0.096646	#N/A	#N/A	#N/A
Coq5	1.60864	1	0.204683	0.642219	3'UTR(M),Intron	-0.0848407	0.92707	0.487042	0.983372
Rgl1	3.16979	2	0.20497	0.642733	3'UTR(M),3'UTR(F)	-0.0148692	#N/A	#N/A	#N/A
Clspn	1.60589	1	0.20507	0.642733	3'UTR(M),Intron	-0.150405	#N/A	#N/A	#N/A
Zdhhc20	1.60416	1	0.205314	0.643146	3'UTR(M),Intron	-0.0881471	0.556676	0.616254	0.983372
Ptpn12	1.60149	1	0.205692	0.643673	3'UTR(M),3'UTR(L),Intron	0.126744	#N/A	#N/A	#N/A
Psmd9	3.16228	2	0.205741	0.643673	3'UTR(M),Intron	-0.0477694	0.0238544	0.916698	0.995963
Ppp1r2	1.60032	1	0.205858	0.643673	3'UTR(M)	-0.0630238	-0.0865743	0.81198	0.987949
Cd320	1.59962	1	0.205958	0.643673	3'UTR(M),3'UTR(F)	-0.192732	#N/A	#N/A	#N/A
Daam1	3.15934	2	0.206043	0.643673	3'UTR(M),Intron	-0.0362624	-0.505718	0.44565	0.983372
Dimt1	3.15626	2	0.206361	0.644192	3'UTR(M),3'UTR(L),3'UTR(F)	-0.0498933	#N/A	#N/A	#N/A
Mob1b	1.596	1	0.20647	0.644192	3'UTR(M),Intron	-0.0900667	0.864845	0.421957	0.983372
Mrpl37	1.59548	1	0.206545	0.644192	3'UTR(M),3'UTR(L)	-0.142953	-0.183073	0.762226	0.987949
Dcdc2a	1.59335	1	0.206848	0.644558	3'UTR(L),3'UTR(F)	-0.321097	#N/A	#N/A	#N/A
Gdpgp1	3.15051	2	0.206955	0.644558	3'UTR(M),3'UTR(L)	-0.0680238	#N/A	#N/A	#N/A
Arl14ep	1.59049	1	0.207256	0.644558	3'UTR(L),Intron	0.0568488	#N/A	#N/A	#N/A
Mfap4	1.58865	1	0.207519	0.644558	3'UTR(L),3'UTR(F)	-0.116399	#N/A	#N/A	#N/A
Usp38	1.58787	1	0.207631	0.644558	3'UTR(M),3'UTR(L)	-0.12968	#N/A	#N/A	#N/A
Lpcat2	1.58737	1	0.207702	0.644558	3'UTR(F),Intron	-0.256258	#N/A	#N/A	#N/A
Gfap	1.58508	1	0.208031	0.644558	3'UTR(S),Intron	0.0745189	0.0220119	0.874012	0.993444
Dnajc12	3.13931	2	0.208117	0.644558	3'UTR(M),3'UTR(L),Intron	-0.213828	#N/A	#N/A	#N/A
Nelfe	1.58412	1	0.208169	0.644558	3'UTR(M),CDS,3'UTR(F)	-0.148503	#N/A	#N/A	#N/A
Zfp971	1.58393	1	0.208195	0.644558	3'UTR(L),Intron	-0.22768	#N/A	#N/A	#N/A
Zfp423	1.58384	1	0.208208	0.644558	3'UTR(L),3'UTR(F)	0.135263	#N/A	#N/A	#N/A
Mfsd6	1.58373	1	0.208225	0.644558	3'UTR(M),Intron	-0.10965	0.188001	0.812707	0.987949
Kcnv1	1.5832	1	0.2083	0.644558	3'UTR(M)	-0.07175	#N/A	#N/A	#N/A
Itih5	3.13507	2	0.208559	0.644558	3'UTR(M),3'UTR(L),3'UTR(F)	0.0626688	#N/A	#N/A	#N/A
Rp9	1.58115	1	0.208596	0.644558	3'UTR(M),CDS,3'UTR(F)	-0.0718281	#N/A	#N/A	#N/A
2310022A10Rik	1.58047	1	0.208693	0.644558	3'UTR(M),3'UTR(F)	0.110643	#N/A	#N/A	#N/A
Alad	1.57841	1	0.20899	0.644558	3'UTR(M),3'UTR(F)	-0.0527035	-0.13742	0.640071	0.983372
Pcid2	5.86973	4	0.20909	0.644558	3'UTR(M),3'UTR(L),Intron	-0.0169709	#N/A	#N/A	#N/A
Acbd6	4.53109	3	0.209534	0.644558	3'UTR(M),3'UTR(L),3'UTR(F),Intron	0.098651	-0.169327	0.528435	0.983372
Cyfip2	1.57452	1	0.209552	0.644558	3'UTR(M),3'UTR(F)	0.0363762	0.078001	0.64987	0.983372
Idh2	4.53031	3	0.209602	0.644558	3'UTR(M),Intron,3'UTR(F)	0.0206087	#N/A	#N/A	#N/A
Zfp60	3.12322	2	0.209798	0.644558	3'UTR(M)	-0.0420024	#N/A	#N/A	#N/A
Pknox2	3.1232	2	0.2098	0.644558	3'UTR(M),Intron	0.0096186	#N/A	#N/A	#N/A
Fam219b	3.12125	2	0.210005	0.644558	3'UTR(M)	0.104226	#N/A	#N/A	#N/A
Zbtb43	1.57056	1	0.210126	0.644558	3'UTR(M),3'UTR(L)	-0.246882	#N/A	#N/A	#N/A
Rab3d	1.57047	1	0.210139	0.644558	3'UTR(M)	-0.122793	0.446441	0.238324	0.983372
Mapre2	3.11939	2	0.2102	0.644558	3'UTR(M),3'UTR(L),Intron	0.0837828	0.0433818	0.804982	0.987949
Nek4	1.56889	1	0.210368	0.644558	3'UTR(M)	0.165957	#N/A	#N/A	#N/A
Itfg2	3.11674	2	0.210479	0.644558	3'UTR(M),3'UTR(L)	-0.0510927	#N/A	#N/A	#N/A
Pde4d	1.56761	1	0.210554	0.644558	3'UTR(M),Intron	0.0403106	#N/A	#N/A	#N/A
Far2	3.1158	2	0.210578	0.644558	Intron	-0.135778	#N/A	#N/A	#N/A
Purg	3.11512	2	0.210649	0.644558	3'UTR(M),3'UTR(F),Intron	0.0762916	-0.237765	0.741111	0.987949
Fam222b	3.11451	2	0.210713	0.644558	3'UTR(M),3'UTR(L),3'UTR(F)	-0.0426828	#N/A	#N/A	#N/A
Gm6277	1.56608	1	0.210778	0.644558	ncRNA	-0.0679665	#N/A	#N/A	#N/A
Socs4	1.56603	1	0.210784	0.644558	3'UTR(M),Intron	0.124666	#N/A	#N/A	#N/A
Kcnab1	1.56578	1	0.210821	0.644558	3'UTR(L),Intron	-0.0426854	0.948907	0.40813	0.983372
Pigc	1.56553	1	0.210857	0.644558	3'UTR(M),3'UTR(F)	-0.0603896	#N/A	#N/A	#N/A
2410015M20Rik	1.56443	1	0.211018	0.644558	3'UTR(M),3'UTR(L)	0.053506	#N/A	#N/A	#N/A
Flywch1	1.56429	1	0.211038	0.644558	3'UTR(M),Intron	-0.0466595	#N/A	#N/A	#N/A
Pcgf2	3.10914	2	0.21128	0.644676	3'UTR(M),3'UTR(L),Intron,3'UTR(F)	0.084859	#N/A	#N/A	#N/A
P3h2	3.10894	2	0.211301	0.644676	3'UTR(M),3'UTR(L),Intron	0.110259	#N/A	#N/A	#N/A
Clic4	1.56017	1	0.21164	0.644773	3'UTR(M)	-0.109202	0.239097	0.562961	0.983372
Lrrc7	4.50711	3	0.211657	0.644773	3'UTR(M),Intron	-0.0427064	#N/A	#N/A	#N/A
Nmt1	4.50697	3	0.21167	0.644773	3'UTR(M),CDS,Intron	0.0404186	0.110543	0.741457	0.987949
Mtcl1	1.55779	1	0.211989	0.645119	3'UTR(M),Intron	0.105512	-2.22993	0.270744	0.983372
Kalrn	1.5576	1	0.212017	0.645119	3'UTR(M),Intron	0.0552198	#N/A	#N/A	#N/A
Fam118a	1.55686	1	0.212126	0.645119	3'UTR(M),Intron	-0.0808992	#N/A	#N/A	#N/A
Wnt5a	3.10015	2	0.212232	0.645119	3'UTR(M)	-0.0254836	#N/A	#N/A	#N/A
Appl1	4.49299	3	0.212916	0.645595	3'UTR(M),Intron	0.0472732	0.0736833	0.732908	0.987949
Csmd3	1.5502	1	0.213107	0.645595	3'UTR(L),Intron	-0.00590689	#N/A	#N/A	#N/A
Cep85	1.54929	1	0.213241	0.645595	3'UTR(M),3'UTR(L),Intron	0.174763	#N/A	#N/A	#N/A
Zfp692	1.54911	1	0.213267	0.645595	3'UTR(M),3'UTR(F)	-0.0543071	#N/A	#N/A	#N/A
Hsp90b1	3.08905	2	0.213413	0.645595	CDS,Intron	-0.01182	-0.0710663	0.656188	0.983372
Fbxo11	1.5481	1	0.213415	0.645595	3'UTR(M),3'UTR(L),Intron	-0.034978	#N/A	#N/A	#N/A
Snrpg	1.54731	1	0.213533	0.645595	3'UTR(M),3'UTR(F)	0.141138	-0.00842754	0.988372	0.997933
Rufy2	4.48508	3	0.213625	0.645595	3'UTR(M),Intron	-0.048201	#N/A	#N/A	#N/A
Gm15446	1.54623	1	0.213693	0.645595	ncRNA	-0.0780892	#N/A	#N/A	#N/A
Irf2bp2	1.54615	1	0.213705	0.645595	3'UTR(M)	0.126835	#N/A	#N/A	#N/A
Rad9b	1.54571	1	0.213769	0.645595	3'UTR(M),3'UTR(L)	-0.194364	#N/A	#N/A	#N/A
Zhx2	3.08563	2	0.213778	0.645595	3'UTR(M),3'UTR(L),Intron	-0.00728861	#N/A	#N/A	#N/A
Dlc1	1.54517	1	0.21385	0.645595	3'UTR(M),3'UTR(L)	0.117929	#N/A	#N/A	#N/A
Tlk1	1.54364	1	0.214077	0.645941	3'UTR(M),Intron	-0.103344	#N/A	#N/A	#N/A
ENSMUSG00000090526	1.542	1	0.21432	0.646	Pseudogene	-0.198254	#N/A	#N/A	#N/A
Arfgef2	1.54141	1	0.214408	0.646	3'UTR(M)	-0.200731	0.727966	0.340498	0.983372
Enpp1	1.54098	1	0.214472	0.646	3'UTR(M),3'UTR(L)	0.381429	#N/A	#N/A	#N/A
Smc6	3.07839	2	0.214554	0.646	3'UTR(M),3'UTR(F),Intron	-0.0651369	#N/A	#N/A	#N/A
Cacng5	1.53973	1	0.214659	0.646	3'UTR(M),3'UTR(L)	0.0713173	#N/A	#N/A	#N/A
Ripk2	1.53877	1	0.214801	0.646091	3'UTR(M)	-0.299743	#N/A	#N/A	#N/A
Igf2r	1.53717	1	0.21504	0.64647	3'UTR(M)	0.11987	#N/A	#N/A	#N/A
Celsr2	1.53568	1	0.215262	0.6468	3'UTR(M),3'UTR(L),3'UTR(F)	-0.0920108	1.02436	0.446118	0.983372
Uggt1	3.0679	2	0.215682	0.647723	3'UTR(M)	-0.0913172	#N/A	#N/A	#N/A
Fastkd2	1.53164	1	0.215866	0.647931	3'UTR(M),3'UTR(L),3'UTR(F)	0.112341	#N/A	#N/A	#N/A
Ryr2	1.53041	1	0.216052	0.647931	3'UTR(M),Intron	0.0902576	0.385768	0.40452	0.983372
Prickle2	1.53015	1	0.21609	0.647931	3'UTR(L),Intron	-0.0277919	#N/A	#N/A	#N/A
Sec24b	1.52549	1	0.216791	0.648853	3'UTR(M),3'UTR(F)	0.113254	0.810253	0.167426	0.983372
Prkd2	1.52524	1	0.216828	0.648853	3'UTR(M),3'UTR(F)	-0.178812	#N/A	#N/A	#N/A
Xpot	1.52459	1	0.216926	0.648853	3'UTR(M),3'UTR(L)	-0.10189	1.04904	0.263365	0.983372
Zfp939	1.52427	1	0.216975	0.648853	Intron	0.0469479	#N/A	#N/A	#N/A
Mir1191	4.44738	3	0.217032	0.648853	ncRNA	-0.0652057	#N/A	#N/A	#N/A
Cisd2	4.44691	3	0.217075	0.648853	3'UTR(M),Intron	0.106206	#N/A	#N/A	#N/A
Rab3ip	1.5195	1	0.217695	0.650369	3'UTR(M)	-0.0572976	0.43773	0.658206	0.983372
Cbx8	1.51777	1	0.217958	0.650814	3'UTR(L),3'UTR(F)	0.277299	#N/A	#N/A	#N/A
Adat2	1.51637	1	0.218169	0.651108	3'UTR(M)	0.0590765	#N/A	#N/A	#N/A
Cbx5	1.51527	1	0.218337	0.651271	3'UTR(M)	0.0794433	-0.0627481	0.882836	0.993444
Atp6v0e	1.50811	1	0.219428	0.653756	3'UTR(M),Intron	0.0434376	#N/A	#N/A	#N/A
Cep97	3.03326	2	0.219451	0.653756	3'UTR(M),3'UTR(L),Intron,3'UTR(F)	0.187128	-1.03263	0.422812	0.983372
Kcnk10	1.50692	1	0.21961	0.653756	3'UTR(M)	-0.203904	#N/A	#N/A	#N/A
Cacnb2	4.41329	3	0.220156	0.653756	3'UTR(M),Intron	0.0891262	-0.298685	0.602928	0.983372
Wwc2	4.41224	3	0.220253	0.653756	3'UTR(M),3'UTR(L)	-0.0445233	2.67949	0.23615	0.983372
Fbxo30	1.5022	1	0.220333	0.653756	3'UTR(M)	0.19764	-0.190843	0.907703	0.99554
Faah	3.02502	2	0.220357	0.653756	3'UTR(M),3'UTR(F)	-0.0545805	0.257627	0.402371	0.983372
Fam13b	1.49997	1	0.220675	0.653756	3'UTR(M)	-0.0375395	#N/A	#N/A	#N/A
Smg7	3.02211	2	0.220677	0.653756	3'UTR(L),Intron	-0.107226	#N/A	#N/A	#N/A
Irak1bp1	1.49995	1	0.220679	0.653756	3'UTR(M),3'UTR(F)	0.125168	#N/A	#N/A	#N/A
Morn1	1.49965	1	0.220725	0.653756	3'UTR(S),Intron	0.0975827	#N/A	#N/A	#N/A
Zfp935	3.01941	2	0.220975	0.653756	3'UTR(M),3'UTR(L)	-0.0755754	#N/A	#N/A	#N/A
Mrps25	4.40339	3	0.221071	0.653756	3'UTR(M)	0.0371883	2.30161	0.0680368	0.983372
Trappc8	1.49645	1	0.221219	0.653756	3'UTR(M),3'UTR(L),Intron	-0.0655094	0.2064	0.791108	0.987949
Zfp329	3.01689	2	0.221254	0.653756	3'UTR(M),CDS	0.0768586	#N/A	#N/A	#N/A
Tbxas1	3.01684	2	0.22126	0.653756	3'UTR(S),Intron	0.183088	#N/A	#N/A	#N/A
Osgepl1	1.49575	1	0.221327	0.653756	3'UTR(L),3'UTR(F)	-0.188366	#N/A	#N/A	#N/A
Camk4	1.49554	1	0.221358	0.653756	3'UTR(L),Intron	0.0747296	-0.0986951	0.678732	0.984831
St7l	3.01516	2	0.221445	0.653756	3'UTR(M),3'UTR(F),Intron	-0.00396095	#N/A	#N/A	#N/A
Nt5e	1.49497	1	0.221446	0.653756	3'UTR(L),Intron	0.133721	#N/A	#N/A	#N/A
Dusp10	1.49278	1	0.221786	0.65416	3'UTR(M),3'UTR(F)	-0.157801	#N/A	#N/A	#N/A
Taco1	4.39509	3	0.221841	0.65416	3'UTR(M),Intron	0.144453	0.982321	0.357484	0.983372
Rbm12b1	1.49086	1	0.222082	0.65416	3'UTR(M),3'UTR(F)	0.141653	#N/A	#N/A	#N/A
Pnma2	1.49077	1	0.222098	0.65416	3'UTR(L),3'UTR(F)	-0.107627	#N/A	#N/A	#N/A
Pik3cb	1.49041	1	0.222153	0.65416	3'UTR(M),Intron	-0.0310874	-2.47216	0.153746	0.983372
Zfp33b	1.48957	1	0.222283	0.65421	3'UTR(F),Intron	-0.0815232	#N/A	#N/A	#N/A
Sik2	1.4873	1	0.222636	0.654912	3'UTR(M),3'UTR(L),3'UTR(F)	0.00933414	#N/A	#N/A	#N/A
Senp6	3.00299	2	0.222797	0.65505	3'UTR(M),3'UTR(F),Intron	-0.0707532	#N/A	#N/A	#N/A
Pdap1	4.37948	3	0.223295	0.655517	3'UTR(L),CDS,Intron	-0.0318467	#N/A	#N/A	#N/A
Fbxo33	1.48035	1	0.22372	0.655517	3'UTR(M),3'UTR(L),3'UTR(F)	-0.0747771	#N/A	#N/A	#N/A
Pank2	2.994	2	0.223801	0.655517	3'UTR(M),3'UTR(F),Intron	-0.127737	1.05763	0.172939	0.983372
Htr4	1.47924	1	0.223893	0.655517	3'UTR(S),Intron	0.115761	#N/A	#N/A	#N/A
Pde4b	1.47913	1	0.22391	0.655517	3'UTR(M),3'UTR(F)	-0.0696891	0.642419	0.3944	0.983372
Lsm3	2.99276	2	0.22394	0.655517	3'UTR(M),3'UTR(L),3'UTR(F)	0.0517845	-1.20394	0.0264396	0.983372
Gm45929	2.99178	2	0.224049	0.655517	Intron	0.0116809	#N/A	#N/A	#N/A
Nectin2	1.478	1	0.224087	0.655517	3'UTR(M),3'UTR(L),Intron	0.227433	#N/A	#N/A	#N/A
Spaca6	1.47793	1	0.224098	0.655517	3'UTR(M),3'UTR(F)	0.097016	#N/A	#N/A	#N/A
Tor1aip2	1.47475	1	0.224598	0.655517	Intron	-0.179286	#N/A	#N/A	#N/A
Crbn	1.47464	1	0.224615	0.655517	3'UTR(M)	0.0571724	0.343893	0.610858	0.983372
Cep170	2.98581	2	0.224719	0.655517	3'UTR(M),CDS	-0.079499	#N/A	#N/A	#N/A
Acbd4	1.47383	1	0.224743	0.655517	3'UTR(M),3'UTR(F)	0.0292989	#N/A	#N/A	#N/A
Pml	4.36323	3	0.224819	0.655517	3'UTR(M),Intron	0.0988813	#N/A	#N/A	#N/A
Tia1	2.98491	2	0.22482	0.655517	3'UTR(M),3'UTR(F)	-0.0668106	0.75197	0.518666	0.983372
Ppp1r12b	2.98411	2	0.224911	0.655517	3'UTR(M),Intron	-0.0567332	#N/A	#N/A	#N/A
Synpo2	2.98286	2	0.22505	0.655517	3'UTR(S),Intron	0.291954	#N/A	#N/A	#N/A
Nxph1	2.9824	2	0.225102	0.655517	3'UTR(M),3'UTR(F),Intron	-0.0528604	#N/A	#N/A	#N/A
Cacng7	1.47094	1	0.225197	0.655517	3'UTR(M),Intron	0.0521279	#N/A	#N/A	#N/A
Scaper	2.9812	2	0.225238	0.655517	3'UTR(M),Intron,3'UTR(F)	-0.15829	#N/A	#N/A	#N/A
Fkbp15	2.9772	2	0.225688	0.656048	3'UTR(M),Intron,3'UTR(F)	-0.081655	#N/A	#N/A	#N/A
G2e3	2.97623	2	0.225798	0.656048	3'UTR(M),3'UTR(L)	0.162113	#N/A	#N/A	#N/A
Prdm15	4.35241	3	0.225839	0.656048	3'UTR(M),3'UTR(L),Intron	0.0924443	#N/A	#N/A	#N/A
Fbxl17	4.35168	3	0.225908	0.656048	3'UTR(M),Intron	0.00186555	#N/A	#N/A	#N/A
Zfpm2	1.46592	1	0.225991	0.656048	Intron	0.0728111	#N/A	#N/A	#N/A
Thsd7a	1.46478	1	0.226171	0.656237	3'UTR(M),3'UTR(L)	-0.0546069	#N/A	#N/A	#N/A
Tmem30a	1.46251	1	0.226531	0.656645	3'UTR(M)	-0.0380069	-0.0967412	0.691575	0.986925
Stard9	2.96967	2	0.22654	0.656645	3'UTR(M),Intron,3'UTR(F)	-0.0975771	#N/A	#N/A	#N/A
Ctnnal1	2.96431	2	0.227147	0.657484	3'UTR(M),3'UTR(L),Intron	-0.190529	#N/A	#N/A	#N/A
Wdr43	2.96411	2	0.227171	0.657484	3'UTR(M),3'UTR(L),CDS,3'UTR(F)	-0.00420168	#N/A	#N/A	#N/A
Oxct1	1.45848	1	0.227172	0.657484	3'UTR(M),3'UTR(F)	-0.0501663	-0.237225	0.114882	0.983372
Tbc1d32	1.45623	1	0.227531	0.657874	3'UTR(L),Intron	0.161449	#N/A	#N/A	#N/A
Zfp704	1.4562	1	0.227536	0.657874	3'UTR(M),3'UTR(L),3'UTR(F)	0.00868014	#N/A	#N/A	#N/A
Tvp23b	1.45418	1	0.227859	0.658475	3'UTR(M),Intron	-0.0605204	#N/A	#N/A	#N/A
Macf1	2.95634	2	0.228055	0.658711	3'UTR(M),Intron	0.0363864	-0.0828314	0.785262	0.987949
Ccnl2	1.45121	1	0.228335	0.659187	3'UTR(M),Intron	-0.0479745	-5.53096	0.000250472	0.266252
Aox1	1.44864	1	0.228746	0.659416	3'UTR(F),Intron	-0.111107	#N/A	#N/A	#N/A
Pdlim5	1.44787	1	0.22887	0.659416	3'UTR(M),3'UTR(L),Intron	0.0844648	-0.189527	0.66631	0.983372
Dlgap4	1.44647	1	0.229096	0.659416	3'UTR(M),3'UTR(F)	0.0288734	#N/A	#N/A	#N/A
Samhd1	4.31792	3	0.229118	0.659416	3'UTR(M),Intron,3'UTR(F)	0.16096	#N/A	#N/A	#N/A
Bmp3	1.44595	1	0.22918	0.659416	3'UTR(M),Intron	-0.144843	#N/A	#N/A	#N/A
Epha7	5.62228	4	0.229188	0.659416	3'UTR(M),3'UTR(F),Intron	0.0995553	0.853205	0.303849	0.983372
Rbks	2.94617	2	0.229217	0.659416	3'UTR(S),Intron	-0.0384445	#N/A	#N/A	#N/A
Dusp12	1.44386	1	0.229516	0.659898	3'UTR(M),Intron,3'UTR(F)	-0.057531	#N/A	#N/A	#N/A
Zfp148	6.88135	5	0.229615	0.659898	3'UTR(M),3'UTR(L),3'UTR(F),Intron	-0.0539502	#N/A	#N/A	#N/A
[truncated: 3,746 more rows]
