# Supplementary material for: Partial loss of CFIm25 causes learning deficits and aberrant neuronal alternative polyadenylation
Source: eLife. 2020 Apr 22;9:e50895. doi: 10.7554/eLife.50895 (PMC7176433; doi:10.7554/eLife.50895)
Supplement: Figure 6—source data 1. — Alternative polyadenylation (APA), likelihood ratio (lr), degrees of freedom (df), first polyadenylation site (F), middle/center polyadenylation site (M), last polyadenylation site (L) mass spectrometry (MS), fold change (FC), intellectual disability (ID), probability of loss of function intolerance (pLI). [file elife-50895-fig6-data1.xlsx]

## Sheet: Sheet1
Gene name	APA lr	APA df	APA p-value	APA adj_p-value	PAS locations	RNA length change	MS log2FC	MS p-value	MS adj_p-value	ID Gene	pLI
CREBRF	642.662	1	8.8117e-142	3.29998e-138	3'UTR(F),3'UTR(L)	-0.735238	#N/A	#N/A	#N/A	#N/A	0.99997
IL1RAP	543.304	1	3.60368e-120	6.7479e-117	Intron	-0.175678	#N/A	#N/A	#N/A	#N/A	0.25846
DDA1	212.889	1	3.21804e-48	4.01718e-45	3'UTR(M)	-0.270988	#N/A	#N/A	#N/A	#N/A	0.93718
NPTX2	194.739	1	2.93724e-44	2.74999e-41	Intron,3'UTR(S)	-0.161833	#N/A	#N/A	#N/A	#N/A	0.030511
ARF4	132.653	1	1.07674e-30	8.06475e-28	3'UTR(M),3'UTR(L)	-0.344183	-0.148403	0.303442	0.700315	#N/A	0.95992
MORF4L1	129.427	1	5.46968e-30	3.41399e-27	3'UTR(F),3'UTR(M)	-0.164819	-0.408061	0.549472	0.83525	#N/A	0.99339
MYO1B	104.178	1	1.84902e-24	9.89225e-22	3'UTR(F),3'UTR(M)	-0.227319	1.92571	0.00779318	0.303553	#N/A	7.2357e-05
FGF1	93.945	1	3.24411e-22	1.51865e-19	3'UTR(F),3'UTR(M),3'UTR(L)	-0.946632	#N/A	#N/A	#N/A	#N/A	0.44406
CRTC3	89.9681	1	2.42033e-21	1.00712e-18	Intron,3'UTR(S)	-0.187214	#N/A	#N/A	#N/A	#N/A	0.86585
AC117402.1	87.7556	1	7.40622e-21	2.77363e-18	na	-0.0788915	#N/A	#N/A	#N/A	#N/A	#N/A
GATA3	80.053	1	3.64495e-19	1.24094e-16	3'UTR(F),3'UTR(M)	-0.569822	#N/A	#N/A	#N/A	#N/A	0.89887
PXDN	78.3814	1	8.49467e-19	2.65105e-16	3'UTR(M)	-0.0927906	0.91692	0.00631932	0.285325	#N/A	2.5126e-07
AIDA	68.5532	1	1.23499e-16	3.55773e-14	3'UTR(F),3'UTR(M)	0.421115	0.206773	0.84911	0.948268	#N/A	0.00015469
NLGN1	64.9763	1	7.5805e-16	2.02778e-13	Intron,3'UTR(F),3'UTR(M)	-0.125037	#N/A	#N/A	#N/A	#N/A	0.85276
CTDSP2	59.6715	1	1.12088e-14	2.79846e-12	3'UTR(F),3'UTR(L)	-0.234162	#N/A	#N/A	#N/A	#N/A	0.11425
PPP1R12A	58.3742	1	2.16712e-14	5.07241e-12	3'UTR(F),3'UTR(M)	-0.196807	-0.0705152	0.785272	0.930471	#N/A	1
EARS2	52.6309	1	4.02502e-13	8.86689e-11	3'UTR(M)	0.885604	-0.16037	0.89564	0.967886	#N/A	1.1238e-08
MFF	51.4945	1	7.17962e-13	1.49376e-10	3'UTR(F),3'UTR(M)	-0.275316	1.12312	0.108861	0.539315	#N/A	0.065397
ST13	48.4761	1	3.34331e-12	6.58984e-10	3'UTR(M)	-0.214164	-0.0275468	0.8909	0.967055	#N/A	0.66074
ORC4	47.9743	1	4.31838e-12	8.08617e-10	3'UTR(M)	-0.234588	#N/A	#N/A	#N/A	#N/A	7.5667e-13
ZNF592	51.2467	2	7.4461e-12	1.32789e-09	3'UTR(F),3'UTR(M)	-0.626144	#N/A	#N/A	#N/A	1	0.99998
ASPHD2	46.5797	1	8.79668e-12	1.49743e-09	3'UTR(F),3'UTR(L)	0.176722	#N/A	#N/A	#N/A	#N/A	0.45902
RYK	50.0523	2	1.35293e-11	2.20293e-09	3'UTR(F),3'UTR(M)	-0.175528	#N/A	#N/A	#N/A	#N/A	0.98922
DCBLD2	49.7834	2	1.54767e-11	2.41501e-09	3'UTR(M)	-0.254153	#N/A	#N/A	#N/A	#N/A	0.095418
ADAM12	49.5947	2	1.70076e-11	2.54773e-09	3'UTR(F),3'UTR(M),3'UTR(L)	-0.311682	#N/A	#N/A	#N/A	#N/A	5.7284e-07
PTP4A1	51.1712	3	4.49795e-11	6.47878e-09	3'UTR(M)	-0.0823253	#N/A	#N/A	#N/A	#N/A	0.28236
RPAP2	47.3907	2	5.11957e-11	7.10104e-09	Intron,3'UTR(F),3'UTR(L)	0.259582	#N/A	#N/A	#N/A	#N/A	2.5763e-07
DPYSL3	42.5259	1	6.97537e-11	9.32956e-09	3'UTR(M),3'UTR(L)	-0.207056	0.368059	0.0308154	0.381023	#N/A	0.99887
COPS8	42.2719	1	7.94275e-11	1.02571e-08	3'UTR(F),3'UTR(M)	-0.228529	-0.0107035	0.977359	0.993749	#N/A	0.72485
ZFX	46.0761	2	9.87853e-11	1.23317e-08	3'UTR(F),3'UTR(M)	0.051944	#N/A	#N/A	#N/A	#N/A	0.99831
GRB10	40.8691	1	1.62776e-10	1.96644e-08	3'UTR(F),3'UTR(L)	-0.412181	#N/A	#N/A	#N/A	#N/A	0.93945
MECP2	39.4419	1	3.37965e-10	3.95524e-08	3'UTR(M),3'UTR(L)	-0.534628	0.461956	0.0473914	0.420957	1	0.89382
RAB22A	38.1466	1	6.56227e-10	7.44718e-08	3'UTR(F),3'UTR(L)	-0.433518	-1.46752	0.156436	0.589047	#N/A	0.10273
JUN	38.0561	1	6.87386e-10	7.57136e-08	3'UTR(M)	-0.190756	2.04699	0.245511	0.664785	#N/A	0.05962
IER3IP1	37.6006	1	8.68168e-10	9.13923e-08	3'UTR(F),3'UTR(M)	-0.325078	0.285707	0.227497	0.652554	1	0.023402
GLS	41.7055	2	8.78537e-10	9.13923e-08	Intron,3'UTR(F),3'UTR(M)	0.165839	0.798791	0.075319	0.484758	#N/A	0.96154
GMEB2	37.2256	1	1.05221e-09	1.06501e-07	3'UTR(F),3'UTR(L)	-0.265688	#N/A	#N/A	#N/A	#N/A	0.99495
COL3A1	37.1622	1	1.087e-09	1.07126e-07	3'UTR(F),3'UTR(L)	-0.0755421	0.630103	0.228327	0.654092	#N/A	1
PXMP4	37.0892	1	1.12846e-09	1.08361e-07	3'UTR(F),3'UTR(L)	-0.614987	#N/A	#N/A	#N/A	#N/A	0.00075854
RBM17	36.4862	1	1.53748e-09	1.43946e-07	3'UTR(F),3'UTR(M)	-0.0904672	0.527285	0.343654	0.727179	#N/A	0.99981
SSR1	40.4752	2	1.62522e-09	1.47222e-07	3'UTR(F),3'UTR(M)	-0.299002	-0.107068	0.819733	0.939302	#N/A	0.2706
VAPA	36.3473	1	1.65109e-09	1.47222e-07	3'UTR(F),3'UTR(M)	-0.12047	0.108828	0.683267	0.901131	#N/A	0.35325
RAB1A	35.8608	1	2.1193e-09	1.84577e-07	3'UTR(M)	-0.153964	-0.156989	0.646292	0.886836	#N/A	0.82305
TMBIM6	34.8932	1	3.48288e-09	2.96441e-07	3'UTR(F),3'UTR(M)	-0.142169	0.384602	0.781899	0.929442	#N/A	0.015024
SAMD14	32.9355	1	9.52654e-09	7.9282e-07	3'UTR(F),3'UTR(L)	-0.277743	#N/A	#N/A	#N/A	#N/A	0.00073677
FAM3C	31.5258	1	1.96806e-08	1.60225e-06	3'UTR(F),3'UTR(M)	-0.315609	-0.31354	0.250772	0.6674	#N/A	0.096904
ST18	31	1	2.58026e-08	2.05597e-06	Intron	0.583637	#N/A	#N/A	#N/A	#N/A	0.99459
ZMPSTE24	30.7452	1	2.94238e-08	2.29567e-06	3'UTR(F),3'UTR(M)	-0.203085	0.379505	0.218762	0.643986	#N/A	8.8702e-16
PPP4R2	33.5151	2	5.27577e-08	4.0322e-06	3'UTR(F),3'UTR(M),3'UTR(L)	0.05821	-1.25635	0.119928	0.552475	#N/A	0.99835
RRAS2	29.5261	1	5.51702e-08	4.13225e-06	3'UTR(M)	-0.571355	0.571407	0.0834867	0.502733	#N/A	0.97463
CPSF6	29.0771	1	6.95532e-08	5.10739e-06	3'UTR(F),3'UTR(M)	-0.208301	0.238555	0.525607	0.822017	#N/A	0.99982
KIF26B	28.5819	1	8.98165e-08	6.46852e-06	3'UTR(F),3'UTR(L)	-0.204217	#N/A	#N/A	#N/A	#N/A	0.99999
RGP1	35.5679	3	9.24136e-08	6.52998e-06	3'UTR(M),3'UTR(L)	0.0552012	#N/A	#N/A	#N/A	#N/A	3.2975e-09
TADA2B	28.4729	1	9.50194e-08	6.58977e-06	3'UTR(F),3'UTR(L)	-0.692171	#N/A	#N/A	#N/A	#N/A	0.72366
CSNK2A1	28.3655	1	1.00441e-07	6.83915e-06	3'UTR(M)	-0.1918	0.952662	0.0953327	0.526398	#N/A	0.98711
LMAN1	27.9334	1	1.25561e-07	8.39691e-06	3'UTR(F),3'UTR(M)	-0.234956	-0.117077	0.635678	0.882904	#N/A	0.0042632
KLC1	27.5626	1	1.52094e-07	9.99285e-06	Intron,3'UTR(F)	-0.319821	0.0675904	0.744002	0.916767	#N/A	0.37095
PARP11	27.109	1	1.92298e-07	1.24165e-05	3'UTR(F),3'UTR(M)	-0.627992	#N/A	#N/A	#N/A	#N/A	6.1763e-09
FBXO32	26.7603	1	2.30318e-07	1.46193e-05	3'UTR(F),3'UTR(M),3'UTR(L)	-0.330789	#N/A	#N/A	#N/A	#N/A	0.99692
DSG2	26.3004	1	2.92225e-07	1.82397e-05	3'UTR(F),3'UTR(M)	-0.242609	1.91032	0.200389	0.631285	#N/A	2.7913e-10
LAMP2	26.2567	1	2.98922e-07	1.83518e-05	Intron	0.335926	-0.265529	0.331545	0.719285	1	0.26698
YIPF5	26.1525	1	3.15484e-07	1.90562e-05	3'UTR(M)	-0.251779	-0.0986425	0.782589	0.929442	#N/A	0.98529
IKBIP	29.8579	2	3.28428e-07	1.94207e-05	Intron,3'UTR(F),3'UTR(L)	-0.298961	0.503102	0.384624	0.739208	#N/A	7.6128e-08
PCM1	29.8305	2	3.32956e-07	1.94207e-05	Intron,3'UTR(F),3'UTR(L)	-0.00860397	0.422182	0.724536	0.908704	#N/A	3.7067e-16
PHF7	26.0247	1	3.37075e-07	1.94207e-05	Intron,3'UTR(S)	0.350461	#N/A	#N/A	#N/A	#N/A	0.0010828
LAMA4	25.4285	1	4.59089e-07	2.60498e-05	Intron,3'UTR(M)	-0.278104	0.261977	0.626767	0.877709	#N/A	1.3909e-24
REEP5	25.1843	1	5.21044e-07	2.9124e-05	3'UTR(M)	-0.12783	0.347768	0.238546	0.661063	#N/A	0.00069737
NDUFA5	25.0749	1	5.51467e-07	3.03712e-05	3'UTR(M)	-0.430659	0.388891	0.437963	0.775157	#N/A	0.0018728
METAP2	24.9759	1	5.80523e-07	3.15081e-05	3'UTR(F),3'UTR(M)	0.0928343	-0.0985032	0.852897	0.950217	#N/A	0.0039908
HIPK1	24.9343	1	5.93164e-07	3.17343e-05	3'UTR(F),3'UTR(M)	-0.166417	#N/A	#N/A	#N/A	#N/A	1
PRSS23	24.7483	1	6.53261e-07	3.44572e-05	Intron	-0.0804259	1.85566	0.0538847	0.440997	#N/A	1.9421e-05
UBR7	24.4006	1	7.82442e-07	4.06978e-05	3'UTR(F),3'UTR(L)	-0.362559	-0.481303	0.592147	0.859301	#N/A	0.49449
CCDC149	27.5123	2	1.06116e-06	5.44392e-05	3'UTR(F),3'UTR(M),3'UTR(L)	-0.495079	#N/A	#N/A	#N/A	#N/A	1.9023e-05
DR1	26.992	2	1.37644e-06	6.93805e-05	3'UTR(F),3'UTR(M)	-0.100351	-0.240334	0.445524	0.777641	#N/A	0.92117
NDFIP1	26.9732	2	1.38946e-06	6.93805e-05	3'UTR(F),3'UTR(M)	-0.102987	#N/A	#N/A	#N/A	#N/A	0.97747
ISCA1	23.0656	1	1.5657e-06	7.71519e-05	3'UTR(F),3'UTR(M)	-0.521391	#N/A	#N/A	#N/A	#N/A	0.17085
DNAJB12	22.977	1	1.63954e-06	7.97414e-05	3'UTR(F),3'UTR(M)	-0.369301	2.23798	0.18116	0.613121	#N/A	0.44012
ABHD18	22.8266	1	1.77298e-06	8.51258e-05	3'UTR(F),3'UTR(L)	-0.866315	#N/A	#N/A	#N/A	#N/A	#N/A
SPTY2D1	26.2617	2	1.98313e-06	9.40103e-05	3'UTR(M),3'UTR(L)	-0.479409	#N/A	#N/A	#N/A	#N/A	0.94476
CD47	22.5351	1	2.06342e-06	9.65937e-05	3'UTR(F),3'UTR(L)	-0.314636	-0.318171	0.102541	0.534536	#N/A	0.91924
ATP2A2	22.4882	1	2.11433e-06	9.77553e-05	Intron,3'UTR(F)	-0.213348	0.119956	0.585603	0.855025	1	0.99945
KHNYN	22.1354	1	2.54078e-06	0.000116039	3'UTR(M)	-0.382503	#N/A	#N/A	#N/A	#N/A	1.6074e-08
NDUFB6	21.4992	1	3.53982e-06	0.000159718	3'UTR(M)	-0.119828	0.33433	0.389833	0.742858	#N/A	0.00016201
UBE2N	24.8323	2	4.05258e-06	0.000180678	3'UTR(F),3'UTR(M)	-0.0932212	0.388065	0.0307713	0.381023	#N/A	0.88156
DAB2	20.8757	1	4.90081e-06	0.000215924	3'UTR(M),3'UTR(L)	-0.367565	-0.0518567	0.882344	0.964454	#N/A	0.40701
CREBZF	20.6683	1	5.46128e-06	0.00023782	Intron,3'UTR(M)	-0.277164	#N/A	#N/A	#N/A	#N/A	0.1003
YME1L1	20.4022	1	6.27585e-06	0.00027015	3'UTR(M)	-0.275526	0.532265	0.737708	0.913983	#N/A	0.028988
TMA16	20.0878	1	7.39683e-06	0.000314786	3'UTR(F),3'UTR(M)	-0.454803	0.0524034	0.929635	0.97969	#N/A	9.6522e-05
BET1	19.8567	1	8.347e-06	0.000351231	Intron	-0.310147	#N/A	#N/A	#N/A	#N/A	0.0038328
MTMR12	19.765	1	8.75728e-06	0.000362657	3'UTR(M),3'UTR(L)	-0.23789	#N/A	#N/A	#N/A	#N/A	0.99638
SLC30A7	23.2787	2	8.81222e-06	0.000362657	3'UTR(F),3'UTR(M),3'UTR(L)	-0.0282552	-0.20517	0.628205	0.877711	#N/A	4.4049e-07
ARRDC4	19.6242	1	9.4268e-06	0.000383732	3'UTR(F),3'UTR(M)	-0.132111	#N/A	#N/A	#N/A	#N/A	1.7064e-07
LYSMD3	19.5169	1	9.97131e-06	0.000401533	3'UTR(F),3'UTR(M)	-0.374542	#N/A	#N/A	#N/A	#N/A	0.30382
CNOT6	22.8408	2	1.09692e-05	0.000434422	Intron,3'UTR(M),3'UTR(L)	-0.212193	#N/A	#N/A	#N/A	#N/A	0.019515
DAB1	19.3259	1	1.10201e-05	0.000434422	Intron,3'UTR(S)	0.975727	#N/A	#N/A	#N/A	#N/A	0.99915
TOB2	19.2995	1	1.11734e-05	0.000435397	3'UTR(F),3'UTR(L)	-0.217803	#N/A	#N/A	#N/A	#N/A	0.88658
NTMT1	19.2785	1	1.12969e-05	0.000435397	3'UTR(F),3'UTR(L)	-0.143232	2.88433	0.0411323	0.406599	#N/A	0.050783
HIGD1A	19.2623	1	1.13936e-05	0.000435397	3'UTR(F),3'UTR(M)	-0.501792	4.5644	0.034745	0.385437	#N/A	0.032658
IRF2BP2	22.624	2	1.22255e-05	0.000462224	3'UTR(M)	-0.136548	0.265184	0.801676	0.936571	#N/A	0.84558
RUFY3	19.1041	1	1.2378e-05	0.000462224	Intron	-0.142408	1.00377	0.00324025	0.267282	#N/A	0.020593
CIAO1	19.0906	1	1.24658e-05	0.000462224	3'UTR(F),3'UTR(M)	-0.423952	1.79056	0.107233	0.538384	#N/A	0.0012454
GNAS	19.0055	1	1.30342e-05	0.000474487	Intron,3'UTR(F)	-0.0980967	0.558043	0.0890897	0.515935	1	0.68076
KATNBL1	22.4934	2	1.305e-05	0.000474487	3'UTR(M)	-0.161276	#N/A	#N/A	#N/A	#N/A	0.72545
PSMD5	18.8238	1	1.43368e-05	0.000516263	3'UTR(M)	-0.153017	-0.925502	0.0973568	0.527561	#N/A	3.2398e-08
ISOC1	18.782	1	1.46541e-05	0.000522663	3'UTR(F),3'UTR(M)	-0.189555	-0.382873	0.293288	0.694242	#N/A	6.0952e-08
DOT1L	25.0237	3	1.52654e-05	0.000539329	Intron,3'UTR(F),3'UTR(M),3'UTR(L)	-0.248778	#N/A	#N/A	#N/A	#N/A	1
ATP7A	18.5689	1	1.63876e-05	0.000573565	3'UTR(M),3'UTR(L)	0.405611	#N/A	#N/A	#N/A	1	0.99983
PAK1	21.9871	2	1.68096e-05	0.000582889	3'UTR(M),3'UTR(L)	-0.156306	0.992713	0.0370333	0.395022	#N/A	0.0013306
MAPK1	21.9022	2	1.75385e-05	0.000602583	Intron,3'UTR(M)	-0.315578	0.144692	0.506366	0.812526	#N/A	0.99698
MCUR1	18.397	1	1.79344e-05	0.000610586	3'UTR(F),3'UTR(L)	-0.567709	#N/A	#N/A	#N/A	#N/A	1.1206e-06
VWA5A	21.8067	2	1.83964e-05	0.00062067	Intron,3'UTR(F),3'UTR(L)	0.419902	0.0476803	0.919863	0.977263	#N/A	2.5953e-29
BOC	18.2333	1	1.95432e-05	0.000652282	Intron,3'UTR(S)	-0.449776	#N/A	#N/A	#N/A	#N/A	1.7426e-07
ZFP82	21.6716	2	1.96817e-05	0.000652282	Intron,3'UTR(M),3'UTR(L)	-0.0810114	#N/A	#N/A	#N/A	#N/A	0.57889
SERP1	18.1333	1	2.05964e-05	0.000676315	3'UTR(M)	-0.19938	#N/A	#N/A	#N/A	#N/A	0.26523
MTHFD2L	21.5642	2	2.0768e-05	0.000676315	Intron	-0.274135	#N/A	#N/A	#N/A	#N/A	6.8566e-06
CENPL	18.0776	1	2.12086e-05	0.000682106	3'UTR(M),3'UTR(L)	-0.783933	#N/A	#N/A	#N/A	#N/A	0.071221
SEPT2	18.0685	1	2.13101e-05	0.000682106	3'UTR(M),3'UTR(L)	-0.194897	#N/A	#N/A	#N/A	#N/A	0.28815
CAMK4	21.4122	2	2.24077e-05	0.00071116	3'UTR(F),3'UTR(M),3'UTR(L)	0.774586	#N/A	#N/A	#N/A	#N/A	0.50957
G3BP1	21.3246	2	2.34112e-05	0.000736765	3'UTR(F),3'UTR(M)	-0.113635	0.124751	0.539305	0.829905	#N/A	0.033122
RIOX2	21.2686	2	2.40761e-05	0.000751375	3'UTR(M),3'UTR(L)	-0.00946069	#N/A	#N/A	#N/A	#N/A	#N/A
GEMIN6	17.7765	1	2.4843e-05	0.000765799	3'UTR(F),3'UTR(L)	-0.483829	#N/A	#N/A	#N/A	#N/A	0.00010596
PRDX6	17.7674	1	2.49626e-05	0.000765799	3'UTR(F),3'UTR(M)	-0.192186	-0.699796	0.0237073	0.349877	#N/A	4.8237e-05
UBA6	17.753	1	2.51518e-05	0.000765799	3'UTR(M)	-0.124535	0.225468	0.429803	0.769499	#N/A	3.7296e-09
CA5B	17.7363	1	2.53742e-05	0.000766342	3'UTR(M),3'UTR(L)	-0.374865	#N/A	#N/A	#N/A	#N/A	0.00026112
RANBP17	17.6614	1	2.63926e-05	0.000790723	Intron,3'UTR(F)	0.517698	#N/A	#N/A	#N/A	#N/A	7.1728e-45
PCDH18	17.5167	1	2.84801e-05	0.000846492	3'UTR(F),3'UTR(M)	-0.329763	#N/A	#N/A	#N/A	#N/A	0.12675
ARHGAP35	17.3438	1	3.11921e-05	0.000919799	3'UTR(M),3'UTR(L)	-0.433795	1.82016	0.00224064	0.233027	#N/A	1
TOMM70	17.303	1	3.18684e-05	0.000932401	3'UTR(F),3'UTR(M),3'UTR(L)	-0.292744	0.655309	0.0225394	0.347547	#N/A	#N/A
GAREM1	17.2449	1	3.28587e-05	0.000953921	Intron,3'UTR(F)	0.66953	#N/A	#N/A	#N/A	#N/A	#N/A
AGO1	23.0504	3	3.9418e-05	0.00113554	3'UTR(M)	-0.477451	-1.79693	0.186724	0.618586	#N/A	1
STX2	16.7443	1	4.27708e-05	0.00122272	Intron,3'UTR(L)	-0.136884	0.250833	0.778692	0.928663	#N/A	2.1087e-07
SOAT1	20.0402	2	4.44963e-05	0.00126241	3'UTR(M),3'UTR(L)	-0.174049	0.706249	0.695642	0.905144	#N/A	7.3621e-10
TMEM267	16.6159	1	4.57669e-05	0.0012887	3'UTR(M),3'UTR(L)	0.458331	#N/A	#N/A	#N/A	#N/A	#N/A
PPP1CB	16.5771	1	4.67121e-05	0.0013055	3'UTR(M)	-0.0617804	0.334524	0.202609	0.632139	#N/A	0.99912
SELENOT	16.5449	1	4.75128e-05	0.00131804	3'UTR(M)	-0.236807	#N/A	#N/A	#N/A	#N/A	#N/A
KDM5A	16.5303	1	4.78778e-05	0.0013184	3'UTR(M)	0.598024	#N/A	#N/A	#N/A	#N/A	1
TMEM87B	16.4037	1	5.11844e-05	0.00139916	3'UTR(F),3'UTR(M),3'UTR(L)	-0.333692	2.04406	0.135062	0.566207	#N/A	3.741e-13
DUSP14	16.314	1	5.3665e-05	0.00145634	3'UTR(F),3'UTR(M)	0.487061	#N/A	#N/A	#N/A	#N/A	0.12114
CES2	16.2015	1	5.69505e-05	0.00153363	3'UTR(F),3'UTR(L)	-0.273218	#N/A	#N/A	#N/A	#N/A	3.5781e-16
TUBD1	16.1888	1	5.73319e-05	0.00153363	3'UTR(F),3'UTR(M),3'UTR(L)	0.480637	#N/A	#N/A	#N/A	#N/A	1.1505e-06
SSH1	16.1503	1	5.85104e-05	0.00155405	3'UTR(F),3'UTR(M)	-0.22046	#N/A	#N/A	#N/A	#N/A	0.00033003
TP53RK	19.4567	2	5.95713e-05	0.00157109	3'UTR(F),3'UTR(M)	-0.468145	-0.756338	0.180727	0.613121	#N/A	0.00077469
SRGAP1	16.0813	1	6.06804e-05	0.00158915	3'UTR(M)	-0.247374	#N/A	#N/A	#N/A	#N/A	0.99845
SDC2	19.3357	2	6.32871e-05	0.0016459	3'UTR(F),3'UTR(M)	-0.333911	-0.79729	0.258557	0.673615	#N/A	0.4049
WDR48	15.9087	1	6.64716e-05	0.0017168	3'UTR(F),3'UTR(L)	-0.134066	0.848982	0.318978	0.711358	#N/A	0.99985
PCGF5	21.8601	3	6.97512e-05	0.00178917	Intron,3'UTR(M)	-0.242563	#N/A	#N/A	#N/A	#N/A	0.98007
GALNT2	15.738	1	7.27482e-05	0.00185335	3'UTR(M)	-0.331741	0.69669	0.0151097	0.329141	#N/A	0.0084175
BAZ1B	18.8983	2	7.87552e-05	0.00199283	3'UTR(F),3'UTR(M),3'UTR(L)	0.00527166	1.63819	0.0917327	0.525217	#N/A	1
ARHGAP24	15.5453	1	8.05515e-05	0.0020246	3'UTR(F),3'UTR(L)	0.78126	#N/A	#N/A	#N/A	#N/A	3.9495e-10
CD44	18.8131	2	8.21858e-05	0.0020519	3'UTR(F),3'UTR(M),3'UTR(L)	-0.0591994	0.867524	0.0648013	0.47143	#N/A	2.4476e-07
NIPAL3	18.7906	2	8.31122e-05	0.00206129	3'UTR(F),3'UTR(M),3'UTR(L)	-0.660486	#N/A	#N/A	#N/A	#N/A	6.9573e-05
LZIC	18.7442	2	8.50643e-05	0.00209583	Intron	-0.529924	0.579949	0.381298	0.737767	#N/A	0.0011711
UFM1	15.1965	1	9.68806e-05	0.00236348	3'UTR(F),3'UTR(M)	-0.301217	0.731111	0.135427	0.566208	#N/A	0.15655
LMBR1	23.5746	4	9.71898e-05	0.00236348	Intron,3'UTR(M)	0.00563169	#N/A	#N/A	#N/A	#N/A	1.2575e-08
PROSER1	15.1604	1	9.8754e-05	0.00238602	3'UTR(F),3'UTR(L)	-0.36074	#N/A	#N/A	#N/A	#N/A	0.71143
MED6	15.1162	1	0.000101091	0.00241644	Intron,3'UTR(M)	-0.387905	#N/A	#N/A	#N/A	#N/A	6.5981e-05
CADM1	15.1084	1	0.000101508	0.00241644	3'UTR(M),3'UTR(L)	-0.12589	0.220244	0.60806	0.868995	#N/A	0.66216
TMEM107	18.3821	2	0.000101948	0.00241644	3'UTR(M)	0.141926	#N/A	#N/A	#N/A	#N/A	3.0521e-08
EXD3	14.9807	1	0.000108614	0.0025575	Intron	-0.719831	#N/A	#N/A	#N/A	#N/A	2.9843e-16
TMEM25	14.9695	1	0.000109266	0.0025575	Intron,3'UTR(F),3'UTR(L)	0.261155	#N/A	#N/A	#N/A	#N/A	2.6304e-11
MYO5A	14.946	1	0.000110633	0.00257341	3'UTR(M),3'UTR(L)	-0.30649	1.30281	0.0557669	0.447861	1	0.944
CBX3	14.8867	1	0.000114165	0.00263918	3'UTR(F),3'UTR(M)	-0.215203	-0.363232	0.328762	0.718431	#N/A	0.40951
EPB41L1	14.8457	1	0.000116671	0.00268057	3'UTR(F),3'UTR(L)	0.366199	1.488	0.0182677	0.338616	1	0.87683
EFNB2	14.7882	1	0.000120285	0.00274674	3'UTR(M),3'UTR(L)	-0.235733	#N/A	#N/A	#N/A	#N/A	0.98845
PTGFRN	18.0174	2	0.00012234	0.00277675	3'UTR(F),3'UTR(M),3'UTR(L)	-0.0136993	0.0912213	0.840899	0.945709	#N/A	0.00047574
MSL2	14.7048	1	0.000125725	0.00283638	3'UTR(F),3'UTR(L)	-0.408603	#N/A	#N/A	#N/A	#N/A	0.62406
GART	14.5697	1	0.000135066	0.00302887	Intron,3'UTR(M)	0.162599	-0.277765	0.345711	0.727179	#N/A	0.00027711
UBR1	14.5426	1	0.000137027	0.0030403	3'UTR(F),3'UTR(L)	-0.381566	1.29535	0.407355	0.753352	1	0.0054862
HADH	14.5402	1	0.000137199	0.0030403	3'UTR(F),3'UTR(M)	-0.409459	-0.0384208	0.89296	0.967886	#N/A	6.5638e-05
C16orf87	14.5142	1	0.00013911	0.00306378	3'UTR(F),3'UTR(L)	-0.245703	#N/A	#N/A	#N/A	#N/A	0.0044861
MXRA7	22.7833	4	0.000139895	0.00306378	Intron,3'UTR(M)	-0.00671029	0.345333	0.169621	0.597987	#N/A	0.00079422
CAAP1	17.7051	2	0.000143016	0.00311392	3'UTR(M),3'UTR(L)	-0.295919	#N/A	#N/A	#N/A	#N/A	0.78449
GPC6	14.411	1	0.000146939	0.00318084	3'UTR(F),3'UTR(M)	-0.183783	2.8075	0.00761683	0.303553	#N/A	0.14181
SPRYD7	14.3273	1	0.000153619	0.00330634	3'UTR(M),3'UTR(L)	0.192826	#N/A	#N/A	#N/A	#N/A	0.00020923
SLK	17.542	2	0.00015517	0.00332065	3'UTR(F),3'UTR(M),3'UTR(L)	-0.233401	-0.378367	0.238005	0.660749	#N/A	0.37441
ATL3	14.2103	1	0.000163472	0.00346919	3'UTR(F),3'UTR(M),3'UTR(L)	-0.262382	0.517196	0.0837738	0.503248	#N/A	1.3349e-09
NEMP1	14.199	1	0.000164459	0.00346919	3'UTR(M),3'UTR(L)	-0.334989	#N/A	#N/A	#N/A	#N/A	#N/A
CYLD	17.4205	2	0.000164891	0.00346919	3'UTR(F),3'UTR(M),3'UTR(L)	-0.243155	#N/A	#N/A	#N/A	#N/A	0.99993
CTNNBIP1	14.0024	1	0.000182574	0.00381978	3'UTR(M),3'UTR(L)	-0.186711	#N/A	#N/A	#N/A	#N/A	0.024772
RNF145	13.9797	1	0.000184798	0.00384482	CDS,3'UTR(M),3'UTR(L)	-0.11836	#N/A	#N/A	#N/A	#N/A	0.98031
RNF24	17.1679	2	0.00018708	0.00387018	3'UTR(M),3'UTR(L)	0.0988825	#N/A	#N/A	#N/A	#N/A	0.030685
DCP1B	13.9465	1	0.000188083	0.00387018	Intron,3'UTR(F),3'UTR(L)	-0.54452	0.283694	0.884547	0.964904	#N/A	1.6028e-10
USP7	17.1246	2	0.000191179	0.00391238	3'UTR(M),3'UTR(L)	-0.236713	0.00972476	0.974716	0.993219	#N/A	1
MAP1LC3B	17.0363	2	0.00019981	0.00404152	3'UTR(F),3'UTR(M)	-0.156382	0.433808	0.0677606	0.476424	#N/A	0.0019065
ZNRF1	17.0332	2	0.00020012	0.00404152	3'UTR(F),3'UTR(M),3'UTR(L)	-0.301893	#N/A	#N/A	#N/A	#N/A	0.90588
HEBP2	13.8181	1	0.000201388	0.00404152	3'UTR(F),3'UTR(M)	-0.342517	-0.0984448	0.660488	0.893297	#N/A	6.0829e-05
SDHAF4	13.8142	1	0.000201806	0.00404152	3'UTR(F),3'UTR(L)	-0.460138	#N/A	#N/A	#N/A	#N/A	#N/A
TSR1	16.9538	2	0.000208227	0.00414792	3'UTR(F),3'UTR(M)	0.0954127	#N/A	#N/A	#N/A	#N/A	5.1573e-21
KIF1C	13.6875	1	0.000215883	0.00427768	3'UTR(F),3'UTR(M)	-0.240359	#N/A	#N/A	#N/A	#N/A	0.71767
FAM204A	16.8194	2	0.000222693	0.00438939	3'UTR(M)	0.0347977	#N/A	#N/A	#N/A	#N/A	0.008495
AMOTL1	16.8052	2	0.000224283	0.00439759	3'UTR(F),3'UTR(M),3'UTR(L)	-0.00210286	#N/A	#N/A	#N/A	#N/A	0.0018316
INSIG1	13.5234	1	0.000235603	0.00459548	3'UTR(F),3'UTR(M)	-0.137401	#N/A	#N/A	#N/A	#N/A	0.0012827
FARP2	13.4858	1	0.000240375	0.00466427	Intron,3'UTR(S)	-0.559679	#N/A	#N/A	#N/A	#N/A	4.6425e-36
TMEM41B	13.4486	1	0.000245184	0.00473306	Intron,3'UTR(L)	-0.200827	#N/A	#N/A	#N/A	#N/A	0.28842
UBE2R2	13.2757	1	0.00026887	0.00516369	3'UTR(F),3'UTR(L)	-0.0740582	0.991578	0.285355	0.688994	#N/A	0.97816
SLC40A1	13.256	1	0.000271709	0.00519158	3'UTR(M),3'UTR(L)	-0.337952	#N/A	#N/A	#N/A	#N/A	0.98835
TM9SF2	13.2255	1	0.000276166	0.00524997	3'UTR(F),3'UTR(M)	-0.200557	0.773946	0.330337	0.718823	#N/A	1
KIAA1217	16.3476	2	0.000281942	0.00533269	Intron,3'UTR(F),3'UTR(M)	0.00992392	0.270343	0.466779	0.790254	#N/A	0.00023185
MRPS30	13.1754	1	0.000283643	0.00533791	3'UTR(F),3'UTR(M)	-0.430095	#N/A	#N/A	#N/A	#N/A	1.5937e-08
RCN1	13.1599	1	0.000286002	0.0053554	3'UTR(F),3'UTR(M)	-0.261038	0.0374794	0.765744	0.923117	#N/A	2.8821e-05
CHMP2B	13.1247	1	0.000291436	0.00542998	3'UTR(F),3'UTR(M),3'UTR(L)	-0.190178	0.0624883	0.840462	0.945709	#N/A	4.6203e-06
COL4A5	13.0994	1	0.00029539	0.00547609	3'UTR(F),3'UTR(L)	-0.286564	#N/A	#N/A	#N/A	#N/A	1
TPM2	13.0903	1	0.000296835	0.00547609	Intron,3'UTR(S)	0.542228	-0.553902	0.0322213	0.381866	#N/A	0.00023947
ZFYVE16	13.0301	1	0.000306529	0.0056272	3'UTR(F),3'UTR(M)	-0.280833	#N/A	#N/A	#N/A	#N/A	2.5587e-13
NUP58	13.0169	1	0.000308696	0.00563935	Intron,3'UTR(L)	-0.524432	-0.186206	0.8054	0.936963	#N/A	#N/A
HNRNPA3	18.731	3	0.000310745	0.00564922	Intron,3'UTR(M)	0.0992131	0.149141	0.334715	0.721375	#N/A	0.99543
WWP1	12.9441	1	0.000320935	0.00580628	3'UTR(M)	0.229593	#N/A	#N/A	#N/A	#N/A	0.99966
PPP2R1B	12.9258	1	0.000324087	0.00583513	Intron	-0.500433	2.1887	0.0939905	0.525801	#N/A	3.0047e-15
TMEM184C	12.8355	1	0.000340103	0.00608332	3'UTR(F),3'UTR(M),3'UTR(L)	-0.677019	#N/A	#N/A	#N/A	#N/A	0.068601
MOB1A	15.9665	2	0.000341121	0.00608332	3'UTR(M),3'UTR(L)	-0.178079	-0.911594	0.0441255	0.412499	#N/A	0.95091
MGEA5	15.8677	2	0.000358397	0.00636113	3'UTR(M),3'UTR(L)	-0.321167	#N/A	#N/A	#N/A	#N/A	0.96569
SYT11	12.6934	1	0.000366956	0.00648231	3'UTR(M)	-0.23896	#N/A	#N/A	#N/A	#N/A	0.92676
MAPRE1	12.6367	1	0.000378257	0.00665057	3'UTR(F),3'UTR(M)	-0.217308	-0.0606447	0.78988	0.93173	#N/A	0.99129
CYBRD1	12.5987	1	0.000386025	0.00675544	3'UTR(F),3'UTR(L)	-0.127016	-0.350622	0.218761	0.643986	#N/A	0.011568
POLR2J4	12.5334	1	0.000399747	0.00696304	na	-0.773111	#N/A	#N/A	#N/A	#N/A	#N/A
SMARCA5	12.5108	1	0.000404615	0.0070152	3'UTR(F),3'UTR(M)	-0.255021	0.355027	0.461099	0.786942	#N/A	1
FZD5	12.485	1	0.000410237	0.0070653	3'UTR(F),3'UTR(M)	0.622447	#N/A	#N/A	#N/A	#N/A	0.98255
SEPHS1	15.5925	2	0.000411278	0.0070653	3'UTR(M)	-0.44505	-0.746138	0.067495	0.475897	#N/A	0.97637
ACP1	12.3832	1	0.000433216	0.00740819	3'UTR(F),3'UTR(M)	-0.30422	0.179875	0.328128	0.718431	#N/A	1.7531e-08
LCOR	12.3639	1	0.000437706	0.00745095	Intron	0.465818	#N/A	#N/A	#N/A	#N/A	0.95022
TMEM167A	12.3489	1	0.000441252	0.00747733	3'UTR(M)	-0.173757	0.0538346	0.866586	0.955696	#N/A	0.00042515
PAWR	17.947	3	0.000451053	0.00760898	3'UTR(M)	-0.293593	0.379473	0.33777	0.722738	#N/A	0.089515
EMC8	12.2921	1	0.000454884	0.0076392	3'UTR(M),3'UTR(L)	-0.502431	0.700404	0.474607	0.793981	#N/A	0.85233
FAM76A	15.3525	2	0.000463713	0.00773552	Intron,3'UTR(M),3'UTR(L)	-0.189607	#N/A	#N/A	#N/A	#N/A	1.0407e-05
XRCC5	12.252	1	0.000464751	0.00773552	3'UTR(F),3'UTR(M)	-0.191131	0.18424	0.364414	0.728618	#N/A	0.99999
WDR41	15.302	2	0.000475561	0.00788042	3'UTR(M)	-0.211218	0.225493	0.830648	0.941979	#N/A	6.4998e-14
SH3GLB1	12.1945	1	0.000479308	0.00790753	3'UTR(F),3'UTR(M),3'UTR(L)	-0.176089	-0.0172739	0.942546	0.985006	#N/A	0.99407
SS18	12.158	1	0.000488785	0.00802852	3'UTR(M),3'UTR(L)	-0.280009	#N/A	#N/A	#N/A	#N/A	0.74566
CCDC90B	12.1481	1	0.000491377	0.00803583	3'UTR(F),3'UTR(M)	-0.428851	1.16948	0.0186502	0.340595	#N/A	9.9297e-06
RAC1	12.0659	1	0.000513531	0.00836162	3'UTR(F),3'UTR(M)	-0.13491	0.168189	0.251154	0.6674	#N/A	0.76228
PRRC1	12.0277	1	0.000524159	0.00849774	Intron,3'UTR(S)	-0.207419	-0.0959387	0.804883	0.936963	#N/A	2.091e-12
APLP2	11.8841	1	0.000566147	0.00913888	3'UTR(F),3'UTR(M),3'UTR(L)	-0.238576	4.24601	0.00354312	0.269966	#N/A	0.37966
SNX1	11.868	1	0.000571082	0.00917898	Intron,3'UTR(S)	-0.294658	-0.033742	0.879736	0.963137	#N/A	0.93179
MARCKS	11.8335	1	0.000581737	0.00929217	3'UTR(F),3'UTR(M)	-0.0523806	0.395631	0.0208079	0.345099	#N/A	0.32648
ICE2	17.4059	3	0.000583087	0.00929217	Intron,3'UTR(M),5UTR	-0.00278807	#N/A	#N/A	#N/A	#N/A	#N/A
CDIP1	11.727	1	0.000615989	0.00977491	3'UTR(F),3'UTR(M),3'UTR(L)	0.265738	#N/A	#N/A	#N/A	#N/A	0.87001
SRPK2	14.7671	2	0.000621387	0.00980932	3'UTR(F),3'UTR(M)	-0.118249	-0.0333425	0.936982	0.982857	#N/A	0.99697
SLC25A46	11.6992	1	0.000625279	0.00980932	3'UTR(M)	-0.524939	-3.64471	0.249321	0.6674	#N/A	1.3077e-05
LAPTM4B	11.697	1	0.000626015	0.00980932	3'UTR(F),3'UTR(M)	-0.168831	#N/A	#N/A	#N/A	#N/A	4.2764e-13
STARD4	14.7119	2	0.000638794	0.00993239	Intron,3'UTR(F),3'UTR(M)	-0.217495	#N/A	#N/A	#N/A	#N/A	6.9854e-11
C19orf12	11.6583	1	0.000639174	0.00993239	3'UTR(F),3'UTR(M)	-0.190751	#N/A	#N/A	#N/A	#N/A	0.34416
RBM18	17.0957	3	0.000675421	0.0104523	3'UTR(M),3'UTR(L)	-0.183107	#N/A	#N/A	#N/A	#N/A	0.00040287
AHR	14.5874	2	0.000679804	0.0104714	3'UTR(M),3'UTR(L)	-0.135086	#N/A	#N/A	#N/A	#N/A	0.99999
PCDHB2	14.5802	2	0.000682252	0.0104714	3'UTR(F),3'UTR(M)	-0.0536311	-0.709585	0.36665	0.729364	#N/A	6.7312e-07
PAK3	17.0259	3	0.000698135	0.0106367	Intron,3'UTR(M)	-0.17654	1.99677	0.0031586	0.267282	1	0.98716
AGPAT5	11.4927	1	0.0006987	0.0106367	3'UTR(F),3'UTR(M)	-0.44745	#N/A	#N/A	#N/A	#N/A	7.0782e-06
ATP11B	17.0137	3	0.000702178	0.0106464	Intron,3'UTR(M),3'UTR(L)	-0.260666	#N/A	#N/A	#N/A	#N/A	0.0020092
TIMP2	11.4405	1	0.000718595	0.0108514	3'UTR(F),3'UTR(L)	-0.0591292	3.22436	0.127245	0.56263	#N/A	0.78893
OSCP1	11.4029	1	0.000733283	0.0109946	Intron,3'UTR(F)	-0.538026	#N/A	#N/A	#N/A	#N/A	7.0317e-10
HSD17B12	16.9202	3	0.000733952	0.0109946	3'UTR(M)	-0.0141724	0.247339	0.211406	0.639892	#N/A	0.00040288
NRP2	16.8532	3	0.000757605	0.0112632	Intron,3'UTR(F),3'UTR(L)	-0.0673074	-0.158489	0.633423	0.881039	#N/A	0.00080686
DYNLT3	11.3416	1	0.000757901	0.0112632	3'UTR(F),3'UTR(L)	-0.259091	#N/A	#N/A	#N/A	#N/A	0.71894
FKBP14	14.3374	2	0.00077031	0.0114024	3'UTR(M),3'UTR(L)	-0.0933025	#N/A	#N/A	#N/A	#N/A	1.5229e-06
VPS13C	14.2922	2	0.000787944	0.0116175	Intron,3'UTR(F),3'UTR(L)	0.288706	0.342994	0.659721	0.892984	#N/A	7.6491e-49
SIKE1	11.2481	1	0.000797064	0.0117059	3'UTR(F),3'UTR(M)	-0.317538	#N/A	#N/A	#N/A	#N/A	0.19572
LYRM4	11.2395	1	0.000800746	0.011714	Intron	-0.101725	#N/A	#N/A	#N/A	#N/A	0.19951
ZBTB10	11.213	1	0.000812283	0.0118104	3'UTR(M)	0.376078	#N/A	#N/A	#N/A	#N/A	0.99067
VMA21	11.2099	1	0.000813638	0.0118104	3'UTR(F),3'UTR(M),3'UTR(L)	-0.341904	0.947685	0.311855	0.706663	#N/A	0.57236
IGF1R	14.1554	2	0.000843692	0.0121993	3'UTR(F),3'UTR(M),3'UTR(L)	0.0901221	#N/A	#N/A	#N/A	#N/A	0.96799
SNX24	11.1152	1	0.000856209	0.0123327	Intron,3'UTR(F)	-0.143182	#N/A	#N/A	#N/A	#N/A	9.5459e-06
TCAIM	11.0902	1	0.000867839	0.0124074	Intron,3'UTR(M),3'UTR(L)	-0.537939	#N/A	#N/A	#N/A	#N/A	2.2334e-05
CREM	11.0898	1	0.000868022	0.0124074	Intron,3'UTR(F)	-0.240158	#N/A	#N/A	#N/A	#N/A	0.50878
IDS	11.0786	1	0.000873319	0.0124357	3'UTR(M)	-0.107917	-0.505568	0.447993	0.779803	1	0.9964
ID4	13.8242	2	0.000995674	0.0140831	3'UTR(M),3'UTR(L)	-0.0196709	#N/A	#N/A	#N/A	#N/A	0.031243
SLC2A3	10.834	1	0.000996532	0.0140831	3'UTR(M),3'UTR(L)	-0.256175	0.68003	0.398467	0.747305	#N/A	0.010333
PSMC2	10.8059	1	0.00101175	0.0142443	3'UTR(F),3'UTR(M),3'UTR(L)	-0.130745	-0.247381	0.129486	0.563209	#N/A	0.99985
MYO10	10.7723	1	0.00103031	0.0144514	3'UTR(M)	-0.325761	#N/A	#N/A	#N/A	#N/A	3.1562e-05
ADAM17	10.7601	1	0.00103714	0.0144919	3'UTR(M)	-0.213197	#N/A	#N/A	#N/A	#N/A	0.99528
CD59	13.7353	2	0.00104094	0.0144919	3'UTR(F),3'UTR(M)	-0.0476472	-0.108797	0.669443	0.896885	#N/A	0.60568
PAFAH1B1	13.6989	2	0.00106005	0.0147032	3'UTR(F),3'UTR(M),3'UTR(L)	-0.199712	0.197377	0.266076	0.676485	1	0.99995
NUP98	13.6202	2	0.00110259	0.0152048	Intron,3'UTR(F),3'UTR(M),3'UTR(L)	-0.108089	0.645686	0.492997	0.804994	#N/A	1
ADAM10	10.6439	1	0.00110433	0.0152048	3'UTR(M)	-0.240362	0.785565	0.2455	0.664785	#N/A	1
EXOC5	10.6143	1	0.00112216	0.0153937	3'UTR(M)	0.188213	0.684065	0.286844	0.689169	#N/A	0.99991
EIF4B	10.6046	1	0.00112808	0.0154185	3'UTR(F),3'UTR(M)	-0.187001	-0.32234	0.188213	0.620535	#N/A	0.99999
NOL4L	13.541	2	0.00114709	0.0156213	3'UTR(F),3'UTR(M),3'UTR(L)	-0.519399	#N/A	#N/A	#N/A	#N/A	#N/A
SLC30A6	13.5207	2	0.00115884	0.0157241	3'UTR(M)	0.113744	#N/A	#N/A	#N/A	#N/A	6.906e-09
MNS1	10.4792	1	0.00120728	0.0163223	Intron,3'UTR(F)	0.831682	#N/A	#N/A	#N/A	#N/A	2.0964e-21
WDFY3	13.4163	2	0.00122092	0.0164472	3'UTR(F),3'UTR(M),3'UTR(L)	-0.434483	#N/A	#N/A	#N/A	#N/A	1
NRCAM	15.8212	3	0.00123381	0.0165614	Intron,3'UTR(F),3'UTR(M),3'UTR(L)	0.0224225	0.382811	0.656912	0.892328	#N/A	0.015254
STK38L	13.3828	2	0.00124154	0.0166055	3'UTR(F),3'UTR(M)	-0.189936	0.401735	0.711649	0.90779	#N/A	0.93427
ARL8B	13.3533	2	0.00125996	0.01675	3'UTR(F),3'UTR(M)	0.162925	0.276421	0.215148	0.641501	#N/A	0.12959
ZNF516	13.3513	2	0.00126128	0.01675	3'UTR(M),3'UTR(L)	0.132435	#N/A	#N/A	#N/A	#N/A	0.99992
CARD8	10.3589	1	0.00128853	0.0170514	Intron	-0.977562	#N/A	#N/A	#N/A	#N/A	1.7672e-06
GAPVD1	13.2994	2	0.00129441	0.0170689	3'UTR(F),3'UTR(M)	-0.228504	0.452112	0.454327	0.784032	#N/A	1
FOSL2	13.2859	2	0.0013032	0.0171245	3'UTR(F),3'UTR(M)	-0.14516	-0.414792	0.599181	0.863485	#N/A	0.98293
EHD1	10.312	1	0.00132169	0.0173068	3'UTR(M),3'UTR(L)	-0.176033	-0.426888	0.284581	0.687956	#N/A	0.98342
KIAA0368	10.3045	1	0.00132708	0.0173168	3'UTR(M)	-0.290834	#N/A	#N/A	#N/A	#N/A	1
ANXA4	10.2949	1	0.00133397	0.0173462	3'UTR(F),3'UTR(M)	-0.283892	0.14014	0.489952	0.803359	#N/A	1.1858e-08
MPI	10.2774	1	0.0013467	0.0174511	Intron,3'UTR(F)	-0.17788	-0.0563764	0.946092	0.985124	#N/A	1.1715e-07
DMD	10.2588	1	0.00136032	0.0175669	Intron,3'UTR(L)	-0.134124	-2.74669	0.0407142	0.406599	1	1
DNAJB1	10.2505	1	0.00136647	0.0175856	3'UTR(F),3'UTR(L)	-0.359896	0.275463	0.381941	0.737887	#N/A	0.039437
NARF	10.2069	1	0.00139915	0.0178899	3'UTR(F),3'UTR(L)	-0.364388	#N/A	#N/A	#N/A	#N/A	9.7836e-13
ITCH	10.2062	1	0.00139966	0.0178899	3'UTR(F),3'UTR(M),3'UTR(L)	-0.598457	#N/A	#N/A	#N/A	#N/A	0.99997
ZNF83	10.1965	1	0.00140709	0.0179236	Intron,3'UTR(M),3'UTR(L)	0.56976	#N/A	#N/A	#N/A	#N/A	NA
RABL3	13.0797	2	0.00144471	0.0183405	3'UTR(M)	-0.366035	1.35146	0.0101097	0.313113	#N/A	0.00080229
FBXW7	10.1122	1	0.00147294	0.0186357	3'UTR(M)	0.253414	#N/A	#N/A	#N/A	#N/A	0.99949
MSH3	10.0956	1	0.00148628	0.0187411	3'UTR(M),3'UTR(L)	-0.229367	#N/A	#N/A	#N/A	#N/A	7.4413e-31
PLP1	10.0719	1	0.00150549	0.0189038	3'UTR(F),3'UTR(M)	-0.321611	#N/A	#N/A	#N/A	1	0.92845
TMEM164	10.0673	1	0.00150928	0.0189038	Intron	-0.420663	#N/A	#N/A	#N/A	#N/A	0.94373
COX15	12.9229	2	0.00156256	0.0194155	Intron	0.206475	#N/A	#N/A	#N/A	1	1.1031e-13
SH3BGRL	10	1	0.00156536	0.0194155	3'UTR(F),3'UTR(M)	-0.125928	-0.0061868	0.970637	0.992617	#N/A	0.30081
CAMSAP1	12.9189	2	0.00156568	0.0194155	3'UTR(F),3'UTR(M),3'UTR(L)	-0.107805	-1.16606	0.432162	0.770483	#N/A	0.99985
NSA2	9.97728	1	0.00158484	0.0195882	3'UTR(F),3'UTR(M)	0.113459	#N/A	#N/A	#N/A	#N/A	0.010263
MLF1	9.9667	1	0.00159397	0.0196363	3'UTR(F),3'UTR(L)	0.239977	#N/A	#N/A	#N/A	#N/A	4.3955e-09
PDPN	9.90003	1	0.00165276	0.0202938	3'UTR(F),3'UTR(M),3'UTR(L)	0.19318	#N/A	#N/A	#N/A	#N/A	0.00032048
ZNF271P	15.1631	3	0.00168246	0.0205909	na	0.125014	#N/A	#N/A	#N/A	#N/A	#N/A
CEP78	9.8464	1	0.00170165	0.0206827	Intron,3'UTR(M)	-0.403591	#N/A	#N/A	#N/A	#N/A	6.1656e-12
CXCL12	12.7451	2	0.00170782	0.0206827	Intron,3'UTR(F),3'UTR(L)	0.134186	2.15448	0.0781664	0.490826	#N/A	0.11851
ZEB2	12.7418	2	0.00171063	0.0206827	3'UTR(F),3'UTR(M),3'UTR(L)	-0.264983	0.900236	0.518579	0.820522	1	1
HMCES	9.83518	1	0.00171205	0.0206827	3'UTR(F),3'UTR(M),3'UTR(L)	-0.377538	#N/A	#N/A	#N/A	#N/A	1.9468e-07
GSPT1	9.82898	1	0.00171783	0.0206858	3'UTR(F),3'UTR(M)	-0.226678	-0.239424	0.376302	0.732658	#N/A	0.99986
SRP72	12.6605	2	0.00178158	0.0213847	3'UTR(F),3'UTR(M)	-0.101526	0.666854	0.0461624	0.418227	#N/A	0.0017104
SLC1A4	12.6311	2	0.001808	0.0216324	3'UTR(F),3'UTR(M)	-0.041048	-0.519758	0.692729	0.903607	1	0.06559
PARM1	9.72708	1	0.00181572	0.0216557	3'UTR(M),3'UTR(L)	0.343824	#N/A	#N/A	#N/A	#N/A	0.000869
MKNK1	9.71755	1	0.00182517	0.0216992	Intron,3'UTR(S)	-0.569636	#N/A	#N/A	#N/A	#N/A	8.0483e-10
TSEN15	9.70805	1	0.00183463	0.0217427	3'UTR(F),3'UTR(M)	-0.172517	#N/A	#N/A	#N/A	#N/A	0.27906
PDK3	12.5791	2	0.00185561	0.0219219	Intron,3'UTR(F),3'UTR(M)	0.0379518	3.22366	0.0275018	0.363198	#N/A	0.44547
OSGIN2	14.9413	3	0.00186752	0.0219933	CDS,3'UTR(M)	0.118263	#N/A	#N/A	#N/A	#N/A	0.59345
TCF3	9.66785	1	0.00187521	0.0220146	Intron,3'UTR(S)	-0.22702	#N/A	#N/A	#N/A	#N/A	0.025824
KIAA1549L	9.64392	1	0.00189979	0.0222335	3'UTR(M),3'UTR(L)	-0.365686	#N/A	#N/A	#N/A	#N/A	1.2946e-07
ABL2	9.62598	1	0.00191844	0.0223818	3'UTR(F),3'UTR(M)	-0.220728	#N/A	#N/A	#N/A	#N/A	3.6365e-07
NPAS2	12.5045	2	0.00192614	0.0224019	Intron,3'UTR(F),3'UTR(M)	-0.0803285	#N/A	#N/A	#N/A	#N/A	1
NFIB	12.4647	2	0.00196484	0.0227812	3'UTR(M),3'UTR(L)	-0.131799	-0.00147104	0.997506	0.999234	#N/A	0.99861
LPL	12.4352	2	0.00199398	0.0230477	3'UTR(F),3'UTR(M),3'UTR(L)	0.0104797	#N/A	#N/A	#N/A	#N/A	1.2712e-09
PLXNA1	9.51796	1	0.00203471	0.0233667	3'UTR(F),3'UTR(L)	-0.276379	0.391391	0.623873	0.876548	#N/A	0.99951
OTUD7B	9.51549	1	0.00203745	0.0233667	3'UTR(M),3'UTR(L)	-0.71983	-0.145488	0.915689	0.976263	#N/A	0.011339
TBRG1	14.7531	3	0.00204029	0.0233667	3'UTR(F),3'UTR(M),3'UTR(L)	-0.141351	#N/A	#N/A	#N/A	#N/A	0.00017381
SMG9	9.49755	1	0.00205747	0.0234613	3'UTR(F),3'UTR(M)	0.344697	-0.0856878	0.958976	0.98972	#N/A	3.4628e-13
HOMER2	9.48684	1	0.00206951	0.0234613	3'UTR(M)	-0.311341	#N/A	#N/A	#N/A	#N/A	0.0093921
CORO1C	9.48401	1	0.00207271	0.0234613	3'UTR(M)	-0.174494	0.657151	0.00570347	0.285325	#N/A	0.99813
ZFYVE26	12.3569	2	0.00207362	0.0234613	Intron,3'UTR(L)	-0.0906068	#N/A	#N/A	#N/A	1	4.6948e-23
AKT3	12.3411	2	0.00209006	0.0235521	Intron	-0.215056	1.44198	0.196104	0.626862	1	0.99958
UBE3C	9.46127	1	0.00209855	0.0235521	3'UTR(M)	-0.0869219	0.330505	0.716786	0.90779	#N/A	1
UST	9.45956	1	0.00210051	0.0235521	3'UTR(F),3'UTR(M)	-0.49599	#N/A	#N/A	#N/A	#N/A	0.43933
VAPB	9.43329	1	0.00213082	0.0238206	3'UTR(M)	-0.370776	0.0952612	0.562852	0.843651	#N/A	0.58111
RSU1	12.2779	2	0.00215716	0.0239925	3'UTR(F),3'UTR(M)	-0.173166	0.127855	0.675337	0.898099	#N/A	0.00089071
DEPTOR	9.40519	1	0.00216373	0.0239925	3'UTR(F),3'UTR(M)	0.251199	#N/A	#N/A	#N/A	#N/A	3.7245e-12
PHF20L1	14.6264	3	0.00216541	0.0239925	Intron,3'UTR(M)	0.16245	#N/A	#N/A	#N/A	#N/A	1
SOCS5	9.37384	1	0.00220104	0.0243153	3'UTR(F),3'UTR(M)	-0.235476	#N/A	#N/A	#N/A	#N/A	0.54156
AP3M1	9.36363	1	0.00221333	0.0243792	3'UTR(M)	-0.350628	0.379696	0.56627	0.844518	#N/A	0.026524
NFATC3	9.32994	1	0.00225439	0.0246949	Intron,3'UTR(M)	0.125224	#N/A	#N/A	#N/A	#N/A	0.99813
NDFIP2	12.189	2	0.00225518	0.0246949	3'UTR(F),3'UTR(M)	-0.0590107	#N/A	#N/A	#N/A	#N/A	0.52743
PPM1B	9.3235	1	0.00226234	0.024701	Intron,3'UTR(M)	0.480339	0.649656	0.16295	0.593668	#N/A	0.0090829
MPRIP	9.28237	1	0.00231369	0.0251168	3'UTR(M),3'UTR(L)	-0.143615	0.0689293	0.877422	0.962445	#N/A	0.98078
STXBP5	16.5945	4	0.00231687	0.0251168	Intron,3'UTR(F),3'UTR(M)	0.024941	#N/A	#N/A	#N/A	#N/A	0.99956
REEP3	9.27696	1	0.00232054	0.0251168	3'UTR(F),3'UTR(L)	-0.151186	#N/A	#N/A	#N/A	#N/A	0.015097
RNF141	9.27104	1	0.00232805	0.0251255	3'UTR(F),3'UTR(M)	-0.424534	#N/A	#N/A	#N/A	#N/A	9.0192e-05
SLC6A6	9.26029	1	0.00234176	0.0251774	3'UTR(M),3'UTR(L)	-0.192642	#N/A	#N/A	#N/A	#N/A	0.98987
ZC3H14	12.1098	2	0.0023463	0.0251774	3'UTR(F),3'UTR(M)	-0.201015	#N/A	#N/A	#N/A	#N/A	0.88291
USP19	9.24406	1	0.00236261	0.0252799	Intron,3'UTR(M)	0.230769	-0.866855	0.51612	0.818453	#N/A	0.99999
DEK	9.23256	1	0.00237749	0.0253666	3'UTR(M)	-0.115408	0.303571	0.582219	0.853328	#N/A	0.13065
GRAMD1B	9.21734	1	0.00239733	0.0255057	3'UTR(F),3'UTR(L)	0.546085	#N/A	#N/A	#N/A	#N/A	0.99929
MAGI2-AS3	16.4969	4	0.00242002	0.0256742	na	-0.0565764	#N/A	#N/A	#N/A	#N/A	#N/A
ZNF561	12.025	2	0.00244797	0.0258973	3'UTR(F),3'UTR(M)	-0.0618896	#N/A	#N/A	#N/A	#N/A	3.0091e-05
DUSP16	9.17097	1	0.00245884	0.0259391	3'UTR(F),3'UTR(M)	-0.534175	#N/A	#N/A	#N/A	#N/A	0.088867
FAM84B	9.1355	1	0.00250697	0.0263724	3'UTR(M),3'UTR(L)	-0.295022	#N/A	#N/A	#N/A	#N/A	0.00036638
ADH5	9.08722	1	0.00257402	0.027002	3'UTR(F),3'UTR(M),3'UTR(L)	-0.202304	-0.0861154	0.626341	0.877709	#N/A	2.5356e-11
KDELR2	11.9083	2	0.00259503	0.0271463	3'UTR(M),3'UTR(L)	-0.157513	0.353699	0.661536	0.893788	#N/A	0.16699
MZT1	9.05817	1	0.00261524	0.0272815	3'UTR(M)	-0.65962	#N/A	#N/A	#N/A	#N/A	0.045971
PLXDC2	14.1881	3	0.00266003	0.0276717	3'UTR(F),3'UTR(M),3'UTR(L)	-0.0856817	0.0623634	0.912545	0.974631	#N/A	0.13416
SMIM8	8.97201	1	0.00274148	0.02844	Intron,3'UTR(L)	-0.643809	#N/A	#N/A	#N/A	#N/A	0.0055617
AP2B1	8.95928	1	0.00276063	0.0285596	3'UTR(F),3'UTR(L)	-0.340416	0.211521	0.380661	0.736921	#N/A	0.9983
RBMS1	11.7439	2	0.00281732	0.0290236	3'UTR(F),3'UTR(M),3'UTR(L)	-0.127259	#N/A	#N/A	#N/A	#N/A	0.11929
TSPAN18	8.91978	1	0.00282098	0.0290236	3'UTR(F),3'UTR(M)	-0.105485	#N/A	#N/A	#N/A	#N/A	0.082002
ZNF512B	8.90623	1	0.002842	0.0291597	3'UTR(M),3'UTR(L)	-0.161535	-0.921051	0.665296	0.894551	#N/A	0.99992
PCMTD1	8.8487	1	0.00293297	0.0298946	3'UTR(F),3'UTR(L)	-0.549516	#N/A	#N/A	#N/A	#N/A	0.26735
RFC1	8.84864	1	0.00293308	0.0298946	3'UTR(M),3'UTR(L)	-0.600687	#N/A	#N/A	#N/A	#N/A	0.97305
TLK1	11.6554	2	0.00294478	0.0298946	Intron,3'UTR(M)	-0.2451	#N/A	#N/A	#N/A	#N/A	0.99999
GPR180	16.0555	4	0.00294556	0.0298946	3'UTR(F),3'UTR(M),3'UTR(L)	-0.0961706	#N/A	#N/A	#N/A	#N/A	4.0903e-09
SORBS1	8.82903	1	0.00296476	0.0300082	3'UTR(M),3'UTR(L)	-0.287348	-0.512795	0.302849	0.69993	#N/A	1.534e-12
DDHD2	8.81066	1	0.00299476	0.0302301	3'UTR(F),3'UTR(M)	-0.180322	-1.29175	0.472022	0.792802	1	1.4321e-10
SLC12A8	8.79313	1	0.00302367	0.0304399	3'UTR(F),3'UTR(L)	-0.441231	#N/A	#N/A	#N/A	#N/A	5.3107e-19
SLC35F5	13.8868	3	0.00306339	0.0307571	3'UTR(M)	-0.160371	#N/A	#N/A	#N/A	#N/A	3.5033e-08
SNX13	8.7565	1	0.00308501	0.0308913	3'UTR(F),3'UTR(M)	-0.27776	#N/A	#N/A	#N/A	#N/A	0.40328
CSTF2	8.74413	1	0.00310601	0.0310187	3'UTR(F),3'UTR(L)	-0.363993	0.0491842	0.888111	0.965623	#N/A	0.99959
PBRM1	8.73186	1	0.00312698	0.031145	3'UTR(F),3'UTR(M)	-0.33078	-1.86887	0.459204	0.785638	#N/A	1
PNKD	8.67697	1	0.00322257	0.0319694	Intron,3'UTR(L)	0.274481	0.731107	0.22756	0.652554	#N/A	4.1392e-08
SREBF1	8.67457	1	0.00322681	0.0319694	3'UTR(F),3'UTR(M)	0.22033	#N/A	#N/A	#N/A	#N/A	0.014708
BMP1	8.65168	1	0.00326761	0.0322881	Intron,3'UTR(F)	-0.264358	1.6129	0.0104747	0.313113	#N/A	0.00088564
IDH3A	8.63146	1	0.00330407	0.0325625	3'UTR(F),3'UTR(L)	-0.197403	-0.16565	0.458425	0.785638	#N/A	0.15704
MFSD1	8.61697	1	0.00333045	0.0327363	3'UTR(F),3'UTR(M)	-0.354022	-1.79432	0.283257	0.686491	#N/A	3.3314e-17
LDLR	8.59901	1	0.00336345	0.0329742	3'UTR(M),3'UTR(L)	0.279585	#N/A	#N/A	#N/A	#N/A	9.841e-24
ITIH5	8.58894	1	0.00338211	0.0330705	3'UTR(F),3'UTR(M)	0.224992	#N/A	#N/A	#N/A	#N/A	7.0952e-21
TMEM5	8.57541	1	0.00340733	0.0332303	3'UTR(F),3'UTR(L)	-0.220013	#N/A	#N/A	#N/A	#N/A	1.072e-06
LTBP2	8.54479	1	0.00346512	0.0337062	3'UTR(M),3'UTR(L)	-0.235875	1.00453	0.0799125	0.492436	#N/A	0.00074122
CPSF2	15.6712	4	0.00349359	0.033895	3'UTR(F),3'UTR(M),3'UTR(L)	0.0797054	-0.33455	0.664351	0.894019	#N/A	5.13e-08
TAX1BP1	8.52371	1	0.0035055	0.0339227	3'UTR(F),3'UTR(M)	-0.0997363	#N/A	#N/A	#N/A	#N/A	1.2061e-07
CEP68	13.5841	3	0.0035296	0.0339945	3'UTR(M),Intron,3'UTR(F),3'UTR(L),CDS	-0.022943	#N/A	#N/A	#N/A	#N/A	0.51822
WDR26	11.2923	2	0.00353107	0.0339945	3'UTR(M),3'UTR(L)	-0.336971	-0.844153	0.249373	0.6674	#N/A	1
KATNAL1	8.49942	1	0.00355259	0.034114	3'UTR(F),3'UTR(L)	-0.311639	#N/A	#N/A	#N/A	#N/A	0.53169
LAMC1	8.48069	1	0.00358935	0.0343113	3'UTR(F),3'UTR(M)	-0.242071	0.837894	0.0202508	0.343945	#N/A	1
TPP1	8.47962	1	0.00359147	0.0343113	3'UTR(M),3'UTR(L)	-0.269522	0.20804	0.474632	0.793981	1	6.2564e-07
SDHA	8.46321	1	0.00362402	0.0345342	3'UTR(F),3'UTR(L)	0.170236	0.377116	0.374739	0.731193	1	2.6088e-10
RAB11FIP2	8.44072	1	0.0036691	0.0347967	3'UTR(M),3'UTR(L)	-0.376887	#N/A	#N/A	#N/A	#N/A	0.94451
RAD23B	8.4402	1	0.00367015	0.0347967	3'UTR(M)	-0.0889143	-0.32072	0.0866885	0.510317	#N/A	0.9963
LOC100129917	8.40917	1	0.00373333	0.0353063	na	-0.431243	#N/A	#N/A	#N/A	#N/A	#N/A
KCMF1	11.1449	2	0.00380113	0.035857	CDS,3'UTR(M)	-0.113183	1.37652	0.465997	0.789364	#N/A	0.97719
CACNG7	8.35719	1	0.00384164	0.0361481	3'UTR(F),3'UTR(L)	-0.480494	#N/A	#N/A	#N/A	#N/A	0.88714
KIAA1107	8.35233	1	0.00385193	0.0361541	Intron,3'UTR(S)	-0.279054	#N/A	#N/A	#N/A	#N/A	0.16557
DHX40	8.34151	1	0.00387493	0.036279	3'UTR(F),3'UTR(M)	-0.222335	-0.615559	0.620154	0.87477	#N/A	0.7556
ZNF480	8.3138	1	0.0039345	0.0367449	3'UTR(S),CDS	-0.768996	#N/A	#N/A	#N/A	#N/A	0.03557
BTBD9	11.0656	2	0.00395488	0.0368433	3'UTR(M),3'UTR(L)	-0.141933	#N/A	#N/A	#N/A	#N/A	7.0655e-09
PHF20	11.055	2	0.0039759	0.0369442	3'UTR(M),3'UTR(L)	0.215931	#N/A	#N/A	#N/A	#N/A	0.99875
ASAH1	11.0502	2	0.00398544	0.0369442	Intron,3'UTR(M),3'UTR(L)	0.0349371	-0.179025	0.271288	0.678893	#N/A	1.2588e-12
PEX16	8.27986	1	0.00400873	0.0370224	3'UTR(S),CDS	0.416734	#N/A	#N/A	#N/A	1	8.2934e-05
ZBTB47	8.27763	1	0.00401365	0.0370224	3'UTR(F),3'UTR(M)	-0.35445	#N/A	#N/A	#N/A	#N/A	0.99983
C12orf29	8.26486	1	0.00404199	0.0371922	3'UTR(F),3'UTR(L)	-0.528239	#N/A	#N/A	#N/A	#N/A	2.1077e-08
PINX1	10.9672	2	0.00415426	0.0381316	Intron,3'UTR(F),3'UTR(L)	-0.109077	#N/A	#N/A	#N/A	#N/A	4.5977e-09
MAP4K4	8.20768	1	0.00417133	0.0381947	3'UTR(F),3'UTR(M)	-0.182692	0.154944	0.876504	0.962445	#N/A	1
CBLL1	8.19514	1	0.00420026	0.0383492	3'UTR(F),3'UTR(L)	-0.5306	#N/A	#N/A	#N/A	#N/A	0.99918
CCNY	8.19151	1	0.00420868	0.0383492	3'UTR(F),3'UTR(M)	-0.306165	-2.4556	0.326485	0.716716	#N/A	0.80672
LUC7L3	10.9125	2	0.00426948	0.0388087	Intron,3'UTR(F),3'UTR(L)	0.0745865	0.707017	0.260585	0.674967	#N/A	0.99999
GABARAPL1	8.15803	1	0.00428708	0.0388744	3'UTR(F),3'UTR(L)	-0.137649	#N/A	#N/A	#N/A	#N/A	0.83532
RPE	10.8791	2	0.00434142	0.039272	3'UTR(F),3'UTR(M)	-0.220775	-1.02275	0.12644	0.560558	#N/A	0.00025152
CAMSAP2	8.12874	1	0.0043569	0.039317	3'UTR(F),3'UTR(M)	-0.137167	0.648718	0.584029	0.854226	#N/A	0.99999
SMAD3	8.11715	1	0.00438485	0.0393742	3'UTR(F),3'UTR(M),3'UTR(L)	-0.367844	#N/A	#N/A	#N/A	#N/A	0.79796
TXNDC15	8.11573	1	0.00438829	0.0393742	CDS,3'UTR(M)	-0.250254	#N/A	#N/A	#N/A	#N/A	0.0096478
PREX1	8.11305	1	0.00439477	0.0393742	3'UTR(F),3'UTR(L)	-0.215395	#N/A	#N/A	#N/A	#N/A	1
PDAP1	8.09393	1	0.00444138	0.0396968	3'UTR(F),3'UTR(M)	0.184946	-1.02548	0.0114188	0.316681	#N/A	0.049626
MUM1	8.08559	1	0.00446185	0.0397848	3'UTR(F),3'UTR(M)	-0.246455	#N/A	#N/A	#N/A	#N/A	0.0021523
USP39	8.07165	1	0.00449631	0.0399968	Intron,3'UTR(S)	0.136844	0.256277	0.618071	0.874427	#N/A	0.01038
PEX3	8.03944	1	0.00457696	0.0406178	3'UTR(F),3'UTR(M)	-0.295223	#N/A	#N/A	#N/A	1	0.016335
TMEM33	10.7681	2	0.00458919	0.04063	3'UTR(F),3'UTR(M)	-0.198695	0.126447	0.784962	0.930326	#N/A	0.0052903
RABGEF1	13.0157	3	0.00460288	0.0406552	Intron,3'UTR(F),3'UTR(M),3'UTR(L)	0.100348	-0.199787	0.769748	0.925589	#N/A	0.00063083
TUSC2	8.02026	1	0.00462569	0.0407605	3'UTR(F),3'UTR(M),3'UTR(L)	-0.263062	#N/A	#N/A	#N/A	#N/A	0.7671
GFRA1	8.01348	1	0.00464303	0.0408173	3'UTR(F),3'UTR(L)	-0.422772	#N/A	#N/A	#N/A	#N/A	0.1175
KIAA1586	7.96031	1	0.00478142	0.0419354	CDS,3'UTR(L)	-0.277655	#N/A	#N/A	#N/A	#N/A	5.7547e-11
TMEM30A	12.9267	3	0.00479793	0.0419819	3'UTR(M),3'UTR(L)	-0.172776	3.31137	0.015202	0.329141	#N/A	0.0031923
SLC23A2	7.9346	1	0.00484985	0.0423372	3'UTR(F),3'UTR(L)	-0.283641	#N/A	#N/A	#N/A	#N/A	0.0062629
SZRD1	7.92898	1	0.00486492	0.0423701	3'UTR(M),3'UTR(L)	-0.182984	-0.240349	0.931247	0.979803	#N/A	0.59651
AKAP13	10.643	2	0.00488544	0.0423966	Intron,3'UTR(F),3'UTR(M)	0.116927	0.63173	0.715916	0.90779	#N/A	0.92909
FZD1	7.91945	1	0.00489061	0.0423966	3'UTR(F),3'UTR(M)	-0.147549	0.31397	0.538422	0.829057	#N/A	0.042428
SEL1L3	7.90725	1	0.0049237	0.0425849	3'UTR(F),3'UTR(L)	-0.40547	#N/A	#N/A	#N/A	#N/A	0.0035827
TM9SF3	7.86652	1	0.00503585	0.0434545	3'UTR(M)	-0.102488	0.047785	0.879473	0.963137	#N/A	0.99999
SCRN3	7.86054	1	0.00505252	0.0434981	3'UTR(F),3'UTR(L)	-0.398708	#N/A	#N/A	#N/A	#N/A	1.4833e-07
TSPAN9	7.84127	1	0.00510668	0.0438635	3'UTR(F),3'UTR(M),3'UTR(L)	-0.181091	#N/A	#N/A	#N/A	#N/A	0.65913
ARMC10	7.79982	1	0.00522514	0.0446945	3'UTR(F),3'UTR(M)	-0.335446	2.25392	0.00459698	0.28331	#N/A	0.00012123
CLMP	10.5077	2	0.00522729	0.0446945	3'UTR(M)	-0.240634	#N/A	#N/A	#N/A	#N/A	1.5718e-07
LOC220729	7.79183	1	0.00524829	0.0447719	na	-0.612996	#N/A	#N/A	#N/A	#N/A	#N/A
SPON1	7.78432	1	0.00527017	0.0448563	3'UTR(F),3'UTR(M)	0.271101	#N/A	#N/A	#N/A	#N/A	#N/A
ABI2	7.77095	1	0.0053093	0.044996	3'UTR(F),3'UTR(M)	-0.300732	1.42805	0.0170045	0.332889	#N/A	0.43122
AIG1	7.76191	1	0.00533595	0.044996	Intron,3'UTR(F)	-0.234923	#N/A	#N/A	#N/A	#N/A	3.6161e-07
DNAJB4	10.4649	2	0.00534052	0.044996	3'UTR(M),3'UTR(L)	-0.224283	0.689172	0.204112	0.633531	#N/A	0.016227
C2orf49	7.75738	1	0.00534935	0.044996	3'UTR(F),3'UTR(M)	-0.391394	#N/A	#N/A	#N/A	#N/A	0.017223
SYT6	7.75425	1	0.00535863	0.044996	3'UTR(F),3'UTR(L)	-0.579584	#N/A	#N/A	#N/A	#N/A	0.0081153
SEL1L	10.4536	2	0.00537067	0.044996	3'UTR(M)	-0.227178	0.818895	0.396626	0.745439	#N/A	0.98233
TRIM38	10.4536	2	0.00537068	0.044996	3'UTR(F),3'UTR(M)	0.0787891	#N/A	#N/A	#N/A	#N/A	1.3947e-08
SLC7A6OS	7.73061	1	0.00542924	0.0453851	3'UTR(F),3'UTR(L)	0.388946	#N/A	#N/A	#N/A	#N/A	0.16755
PPP1R12B	7.71399	1	0.00547945	0.0456307	Intron,3'UTR(L)	-0.292492	#N/A	#N/A	#N/A	#N/A	0.00012038
KLHL42	7.70906	1	0.00549444	0.0456307	3'UTR(F),CDS,3'UTR(L)	-0.428692	0.899357	0.698908	0.905961	#N/A	0.012525
WDR5	10.4078	2	0.00549517	0.0456307	3'UTR(F),3'UTR(M),3'UTR(L)	-0.00113334	0.886121	0.334174	0.721103	#N/A	0.99978
HMGN4	7.70227	1	0.00551513	0.0456951	3'UTR(F),3'UTR(L)	-0.267856	-0.14441	0.713091	0.90779	#N/A	0.31986
AL138752.2	7.66732	1	0.005623	0.046486	Intron	-0.116232	#N/A	#N/A	#N/A	#N/A	#N/A
COL13A1	7.65185	1	0.0056714	0.0467828	Intron,3'UTR(F),3'UTR(M)	-0.483098	#N/A	#N/A	#N/A	#N/A	3.7355e-14
MFAP5	7.61524	1	0.0057877	0.0476372	3'UTR(F),3'UTR(M)	-0.26256	#N/A	#N/A	#N/A	#N/A	0.0050619
ABCF2	7.59329	1	0.00585859	0.0481149	Intron	-0.312983	0.311341	0.671092	0.897412	#N/A	0.011301
PTPN2	7.56736	1	0.00594347	0.0487051	Intron,3'UTR(L)	0.238018	-0.684931	0.710326	0.90779	#N/A	0.99953
PAPSS2	7.56343	1	0.00595645	0.0487051	3'UTR(F),3'UTR(M)	-0.145887	0.167721	0.697235	0.905933	#N/A	1.9748e-10
ANKH	10.2149	2	0.00605155	0.0493749	Intron,3'UTR(F),3'UTR(M)	0.13441	#N/A	#N/A	#N/A	1	0.27856
BUB3	10.1984	2	0.00610167	0.0495813	Intron,3'UTR(F)	-0.121163	0.421977	0.241476	0.663766	#N/A	0.80927
EEF2KMT	10.1942	2	0.00611431	0.0495813	3'UTR(F),3'UTR(M),3'UTR(L)	-0.258414	#N/A	#N/A	#N/A	#N/A	#N/A
ANKRD42	7.51564	1	0.00611657	0.0495813	Intron	-0.443196	#N/A	#N/A	#N/A	#N/A	2.1439e-10
ZNF414	7.51161	1	0.00613026	0.0495849	Intron,3'UTR(S)	-0.542776	#N/A	#N/A	#N/A	#N/A	0.055057
FAM155A	10.1717	2	0.00618369	0.0499093	Intron,3'UTR(F),3'UTR(L)	0.346071	#N/A	#N/A	#N/A	#N/A	0.97586
RBM27	7.47897	1	0.00624237	0.0502745	3'UTR(F),3'UTR(M)	-0.0940538	#N/A	#N/A	#N/A	#N/A	0.99999
SSR3	10.1419	2	0.00627658	0.0504416	3'UTR(M)	-0.113324	0.212259	0.590253	0.8588	#N/A	0.74736
MSANTD4	7.46131	1	0.0063039	0.0505177	3'UTR(M),3'UTR(L)	0.110707	#N/A	#N/A	#N/A	#N/A	0.013981
ERLIN1	7.45871	1	0.00631303	0.0505177	3'UTR(M),3'UTR(L)	-0.151101	-0.366759	0.135253	0.566207	#N/A	0.17751
VTA1	10.1108	2	0.0063747	0.0509025	3'UTR(F),3'UTR(M)	-0.0610941	0.365681	0.0690125	0.478487	#N/A	0.00039935
SENP5	12.3079	3	0.00639958	0.0509924	3'UTR(F),3'UTR(M)	-0.0927371	#N/A	#N/A	#N/A	#N/A	0.99978
FEM1B	10.0859	2	0.00645454	0.0512319	3'UTR(M)	-0.0607828	#N/A	#N/A	#N/A	#N/A	0.34865
ZNHIT6	10.0852	2	0.00645699	0.0512319	3'UTR(F),3'UTR(M)	-0.28453	#N/A	#N/A	#N/A	#N/A	7.5337e-12
PGRMC2	10.0477	2	0.00657914	0.0520906	3'UTR(M),3'UTR(L)	-0.12769	-0.0644405	0.75047	0.917548	#N/A	0.6801
RPS6KC1	7.37931	1	0.00659785	0.0521286	3'UTR(F),3'UTR(M)	-0.438464	#N/A	#N/A	#N/A	#N/A	0.001257
PDZD8	7.36012	1	0.00666863	0.0525769	3'UTR(M)	-0.283529	0.973906	0.592781	0.859472	#N/A	0.99984
TENM3	7.33071	1	0.00677864	0.0533319	3'UTR(F),3'UTR(L)	-0.185991	-0.439118	0.250946	0.6674	#N/A	0.99955
ARMC7	7.32234	1	0.00681026	0.0534684	Intron,3'UTR(F),3'UTR(L)	-0.177166	#N/A	#N/A	#N/A	#N/A	0.036089
CTSC	7.31279	1	0.00684654	0.0536408	Intron,3'UTR(M)	-0.807935	0.665986	0.179096	0.611171	#N/A	1.1451e-07
ZNF197	12.1398	3	0.00691936	0.0540981	Intron,3'UTR(F),3'UTR(M),3'UTR(L)	-0.00940717	#N/A	#N/A	#N/A	#N/A	5.2329e-13
RAB27A	7.27618	1	0.00698748	0.0545169	3'UTR(F),3'UTR(L)	-0.607992	0.987388	0.282125	0.685337	1	3.0027e-07
CNIH1	7.25212	1	0.00708174	0.0551374	3'UTR(M),3'UTR(L)	-0.120939	#N/A	#N/A	#N/A	#N/A	0.64965
ZHX3	7.24177	1	0.00712266	0.055341	3'UTR(M),3'UTR(L)	0.268868	#N/A	#N/A	#N/A	#N/A	0.050815
CLCN3	12.0718	3	0.00714119	0.0553701	3'UTR(F),3'UTR(M),3'UTR(L)	0.109965	4.50888	0.0155994	0.329141	#N/A	0.99973
MTERF4	12.0612	3	0.00717654	0.0554671	Intron	-0.0518239	#N/A	#N/A	#N/A	#N/A	#N/A
MIR99AHG	9.87199	2	0.00718333	0.0554671	na	-0.17645	#N/A	#N/A	#N/A	#N/A	#N/A
OSBPL1A	7.18325	1	0.00735871	0.0567045	3'UTR(F),3'UTR(M)	-0.534985	#N/A	#N/A	#N/A	#N/A	2.576e-07
TBL1XR1	9.8183	2	0.00737876	0.0567422	3'UTR(M)	-0.146318	-1.075	0.0102416	0.313113	#N/A	0.99995
SRR	9.8008	2	0.00744362	0.057042	3'UTR(F),CDS,3'UTR(M)	-0.342716	1.48991	0.18179	0.614046	#N/A	0.0057964
DDX18	7.16157	1	0.00744821	0.057042	3'UTR(F),3'UTR(M)	-0.31317	0.147819	0.819749	0.939302	#N/A	0.13804
COL25A1	7.14346	1	0.00752378	0.0575032	3'UTR(F),3'UTR(L)	-0.320072	#N/A	#N/A	#N/A	#N/A	1.6393e-18
LSM14A	9.77407	2	0.00754376	0.0575385	3'UTR(F),3'UTR(M)	-0.0628932	-0.323041	0.514581	0.818382	#N/A	0.03987
SCCPDH	7.12477	1	0.00760263	0.0578696	3'UTR(F),3'UTR(M)	-0.245806	-0.100924	0.713017	0.90779	#N/A	4.5839e-09
HIVEP2	7.11397	1	0.00764857	0.0581012	3'UTR(F),3'UTR(M),3'UTR(L)	0.158965	#N/A	#N/A	#N/A	#N/A	1
ITM2B	7.10731	1	0.00767704	0.0581313	3'UTR(F),3'UTR(M)	-0.159639	#N/A	#N/A	#N/A	#N/A	0.62589
CAMK1D	7.10578	1	0.00768357	0.0581313	3'UTR(F),3'UTR(M)	-0.170809	#N/A	#N/A	#N/A	#N/A	0.9962
RPS25	9.72317	2	0.0077382	0.0584265	3'UTR(F),CDS,3'UTR(M)	0.265521	-0.324403	0.163245	0.593668	#N/A	0.86346
KITLG	7.08076	1	0.0077916	0.0586493	3'UTR(M),3'UTR(L)	-0.233153	#N/A	#N/A	#N/A	#N/A	0.85024
BCLAF1	9.70751	2	0.00779903	0.0586493	3'UTR(M)	0.14229	-0.124924	0.723725	0.908704	#N/A	2.0629e-14
MRPS25	9.66402	2	0.00797049	0.0598186	Intron,3'UTR(M)	-0.0277178	#N/A	#N/A	#N/A	#N/A	0.00047858
TOR1B	7.03415	1	0.00799697	0.0598973	Intron,3'UTR(M)	-0.360329	1.36922	0.291297	0.69368	#N/A	0.064206
PRKAR1A	7.02382	1	0.00804324	0.0600459	Intron	-0.196628	-0.460364	0.0460435	0.418227	#N/A	0.99985
ATP2B4	9.6412	2	0.00806196	0.0600459	Intron,3'UTR(F),3'UTR(M)	0.108784	-0.166071	0.641762	0.885891	#N/A	0.0015112
GPNMB	7.019	1	0.00806491	0.0600459	Intron,3'UTR(L)	0.147199	0.083886	0.828814	0.941396	#N/A	2.8803e-27
ZDHHC9	9.62795	2	0.00811552	0.0603029	3'UTR(M)	-0.00732026	#N/A	#N/A	#N/A	1	0.73749
GNA12	11.7857	3	0.00815445	0.0604721	3'UTR(M),3'UTR(L)	-0.208756	#N/A	#N/A	#N/A	#N/A	0.96994
GHITM	6.98509	1	0.00821914	0.0608314	3'UTR(F),3'UTR(M)	-0.288458	0.375205	0.365527	0.729301	#N/A	0.011502
LMF1	6.97667	1	0.00825789	0.0609739	3'UTR(F),3'UTR(L)	-0.40907	-1.04347	0.376601	0.732658	#N/A	5.1419e-16
PAK2	6.97385	1	0.00827095	0.0609739	3'UTR(M),3'UTR(L)	-0.230708	0.376071	0.200749	0.631285	#N/A	0.97169
RIMKLA	6.95847	1	0.00834234	0.0613793	3'UTR(F),3'UTR(M)	-0.611532	#N/A	#N/A	#N/A	#N/A	0.00063057
GMFB	9.55862	2	0.0084018	0.0614938	3'UTR(F),3'UTR(M),3'UTR(L)	-0.136896	-0.778157	0.176794	0.609081	#N/A	0.0053339
NUP214	6.94415	1	0.00840938	0.0614938	3'UTR(F),3'UTR(L)	0.347167	-0.0164329	0.986439	0.995913	#N/A	0.054748
C4orf3	6.94243	1	0.00841748	0.0614938	3'UTR(M),3'UTR(L)	-0.208426	3.79555	0.247965	0.666978	#N/A	0.30797
BBS7	11.7115	3	0.00843969	0.0614938	Intron,3'UTR(F),3'UTR(M),3'UTR(L)	0.187295	4.39377	0.0201353	0.343945	1	7.0515e-09
BORA	6.93427	1	0.00845594	0.0614938	3'UTR(F),3'UTR(L)	-0.889301	#N/A	#N/A	#N/A	#N/A	0.00032563
RGS4	6.93417	1	0.00845643	0.0614938	3'UTR(F),3'UTR(L)	-0.198904	#N/A	#N/A	#N/A	#N/A	5.1409e-08
AGAP1	6.91596	1	0.00854299	0.0620029	3'UTR(F),3'UTR(M)	-0.208777	1.24455	0.216404	0.641501	#N/A	0.99984
ABHD5	6.89919	1	0.0086235	0.0624356	3'UTR(F),3'UTR(M)	-0.585977	#N/A	#N/A	#N/A	1	6.4201e-07
CASD1	9.50358	2	0.00863623	0.0624356	3'UTR(F),3'UTR(M)	0.190032	#N/A	#N/A	#N/A	#N/A	0.044844
GPM6B	9.49979	2	0.00865262	0.0624356	Intron,3'UTR(L)	-0.0614517	#N/A	#N/A	#N/A	#N/A	0.34626
TMED10	6.88711	1	0.00868198	0.0625269	3'UTR(F),3'UTR(M),3'UTR(L)	-0.177631	0.307622	0.134179	0.565303	#N/A	0.86011
TMEM8B	9.48805	2	0.00870353	0.0625618	Intron,3'UTR(F),3'UTR(M),3'UTR(L)	0.0954645	#N/A	#N/A	#N/A	#N/A	2.7974e-06
TBC1D9B	6.87901	1	0.00872136	0.0625699	3'UTR(M),3'UTR(L)	-0.458549	-0.672176	0.457672	0.785638	#N/A	5.0231e-12
AGO3	9.47376	2	0.00876595	0.0627696	3'UTR(F),3'UTR(M),3'UTR(L)	0.408182	0.180559	0.747993	0.916767	#N/A	0.99997
CMBL	6.85141	1	0.00885715	0.0633016	3'UTR(M)	0.481716	-0.662586	0.196428	0.626862	#N/A	0.00011148
SMC5	9.4471	2	0.00888358	0.0633695	3'UTR(F),3'UTR(M),3'UTR(L)	-0.0742102	#N/A	#N/A	#N/A	#N/A	3.1326e-06
MGAT2	6.84041	1	0.00891185	0.0634503	3'UTR(F),3'UTR(M)	-0.152968	#N/A	#N/A	#N/A	1	0.034151
NIPA1	6.8237	1	0.00899562	0.0639252	3'UTR(F),3'UTR(M),3'UTR(L)	-0.217462	#N/A	#N/A	#N/A	#N/A	0.0058703
PCNX4	6.81615	1	0.00903374	0.0640745	3'UTR(F),3'UTR(M)	0.14773	#N/A	#N/A	#N/A	#N/A	#N/A
ACTR3	6.80924	1	0.00906873	0.0642011	3'UTR(F),3'UTR(M)	-0.083238	0.0211445	0.925813	0.97969	#N/A	0.99986
DNAJC11	6.80152	1	0.00910802	0.0643576	3'UTR(M),3'UTR(L)	-0.340851	0.608838	0.402985	0.751329	#N/A	0.99893
MTSS1L	6.79295	1	0.00915186	0.0645456	3'UTR(F),3'UTR(M),3'UTR(L)	-0.220104	-2.54909	0.157116	0.589718	#N/A	0.97998
SON	9.38315	2	0.00917221	0.0645675	Intron,3'UTR(F),3'UTR(M)	-0.101385	-0.224241	0.716859	0.90779	#N/A	1
PRPF38A	9.36218	2	0.00926892	0.0651259	3'UTR(F),3'UTR(M),3'UTR(L)	-0.27985	-2.31852	0.344744	0.727179	#N/A	0.77227
LIMCH1	9.35536	2	0.00930055	0.0652258	3'UTR(F),3'UTR(M),3'UTR(L)	-0.171669	0.414606	0.83552	0.944501	#N/A	0.94734
DCP2	6.75721	1	0.00933696	0.0652273	3'UTR(M)	-0.139946	#N/A	#N/A	#N/A	#N/A	0.66403
ALG13	6.75266	1	0.00936081	0.0652273	Intron,3'UTR(F)	0.230642	#N/A	#N/A	#N/A	1	0.99998
TAF3	6.75144	1	0.00936718	0.0652273	3'UTR(F),3'UTR(M)	-0.523444	#N/A	#N/A	#N/A	#N/A	0.99997
HSDL2	9.34039	2	0.00937043	0.0652273	3'UTR(M),3'UTR(L)	0.0973171	-0.256289	0.559843	0.841873	#N/A	5.1377e-05
SOGA1	6.72302	1	0.00951761	0.0661289	Intron,3'UTR(S)	-0.299877	#N/A	#N/A	#N/A	#N/A	1
STAT3	9.28809	2	0.0096187	0.0667075	3'UTR(F),3'UTR(M),3'UTR(L)	-0.0896671	-0.0759927	0.692318	0.903307	#N/A	1
XPR1	6.69296	1	0.00967945	0.0670047	3'UTR(M),3'UTR(L)	0.121034	-1.29548	0.594783	0.860838	#N/A	0.99999
PHF10	6.68966	1	0.00969739	0.0670051	Intron,3'UTR(S)	0.177728	#N/A	#N/A	#N/A	#N/A	0.0002878
ZNF678	6.65952	1	0.00986276	0.0680218	Intron	-0.393181	#N/A	#N/A	#N/A	#N/A	0.015898
PPP2R5E	11.3708	3	0.00988088	0.0680218	3'UTR(M),3'UTR(L)	0.0981379	0.335287	0.331861	0.719332	#N/A	0.99997
METTL6	9.21425	2	0.00998045	0.0685132	Intron,3'UTR(F),CDS,3'UTR(M)	0.164682	#N/A	#N/A	#N/A	#N/A	2.1044e-05
KAT6A	6.63689	1	0.00998884	0.0685132	3'UTR(M),3'UTR(L)	0.133996	#N/A	#N/A	#N/A	1	1
CREG1	6.62817	1	0.0100378	0.0687234	3'UTR(M),3'UTR(L)	-0.32819	#N/A	#N/A	#N/A	#N/A	0.0012232
ULK2	9.18416	2	0.0101318	0.06924	Intron,3'UTR(S)	0.309366	#N/A	#N/A	#N/A	#N/A	1.877e-08
NRP1	9.17818	2	0.0101621	0.0693207	Intron,3'UTR(M)	0.151776	0.581909	0.587778	0.856696	#N/A	0.98584
FAM20C	6.60114	1	0.0101913	0.0693937	Intron,3'UTR(M),3'UTR(L)	-0.206745	#N/A	#N/A	#N/A	#N/A	0.31465
RAP1GDS1	6.5885	1	0.0102639	0.0697612	3'UTR(F),3'UTR(L)	-0.22463	0.42274	0.14568	0.579389	#N/A	0.93288
SPARC	6.57264	1	0.0103558	0.0701322	3'UTR(M)	-0.0584582	0.0131535	0.964899	0.990997	#N/A	0.89148
TSEN2	6.57261	1	0.010356	0.0701322	Intron,3'UTR(F)	-0.562823	#N/A	#N/A	#N/A	#N/A	1.0092e-11
GOLGA1	6.56785	1	0.0103837	0.0701932	3'UTR(F),3'UTR(M)	-0.493099	0.399761	0.68202	0.900778	#N/A	1.4256e-06
LRRC4	6.53566	1	0.0105733	0.0713458	3'UTR(F),3'UTR(L)	-0.367806	#N/A	#N/A	#N/A	#N/A	0.99787
NPLOC4	6.53034	1	0.010605	0.0713562	3'UTR(F),3'UTR(M),3'UTR(L)	-0.113565	0.541541	0.277554	0.681528	#N/A	0.99998
ELOB	6.5273	1	0.0106231	0.0713562	Intron,3'UTR(S)	0.075363	-0.00538811	0.981222	0.99443	#N/A	#N/A
ZNF148	13.1356	4	0.010632	0.0713562	3'UTR(F),3'UTR(M),3'UTR(L)	-0.181371	#N/A	#N/A	#N/A	#N/A	0.99997
GPATCH8	6.49448	1	0.010821	0.0723996	3'UTR(M),3'UTR(L)	0.515969	#N/A	#N/A	#N/A	#N/A	1
KALRN	11.173	3	0.0108261	0.0723996	Intron,3'UTR(F)	0.360095	#N/A	#N/A	#N/A	#N/A	1
ST3GAL1	9.04371	2	0.0108688	0.0725557	3'UTR(F),3'UTR(M),3'UTR(L)	-0.0917657	#N/A	#N/A	#N/A	#N/A	0.58269
DNAJC15	6.45478	1	0.0110654	0.0737365	3'UTR(F),3'UTR(L)	-0.411087	#N/A	#N/A	#N/A	#N/A	1.682e-10
RSF1	8.98411	2	0.0111976	0.074485	3'UTR(M),3'UTR(L)	0.232598	0.15094	0.862186	0.95412	#N/A	1
DNMT3A	8.97644	2	0.0112407	0.0746272	3'UTR(F),3'UTR(M)	0.483308	0.743272	0.513478	0.817838	1	7.3538e-39
ABHD15	6.424	1	0.0112588	0.0746272	3'UTR(F),3'UTR(M),3'UTR(L)	0.376197	#N/A	#N/A	#N/A	#N/A	3.5459e-08
SECISBP2	6.41038	1	0.0113455	0.0750522	3'UTR(F),3'UTR(M)	-0.347317	#N/A	#N/A	#N/A	#N/A	2.1874e-18
SLC6A11	6.40736	1	0.0113648	0.0750522	Intron,3'UTR(F)	0.61741	#N/A	#N/A	#N/A	#N/A	4.83e-05
NMNAT1	8.95108	2	0.0113841	0.0750522	3'UTR(M)	0.0105058	#N/A	#N/A	#N/A	#N/A	0.035353
UBR5	8.94774	2	0.0114031	0.0750522	3'UTR(F),3'UTR(M)	-0.190088	-0.45724	0.841268	0.945709	#N/A	1
TMEM108	6.39618	1	0.0114366	0.0751405	3'UTR(F),3'UTR(L)	0.351186	#N/A	#N/A	#N/A	#N/A	0.99555
FRZB	6.38881	1	0.0114842	0.075321	3'UTR(F),3'UTR(M)	-0.271439	-1.37836	0.338361	0.723286	#N/A	0.0010842
FBXL4	8.91704	2	0.0115795	0.0757734	3'UTR(M),3'UTR(L)	0.0108008	#N/A	#N/A	#N/A	#N/A	1.1384e-08
FAM102A	6.37198	1	0.0115936	0.0757734	3'UTR(M),3'UTR(L)	-0.18028	#N/A	#N/A	#N/A	#N/A	0.10983
FBXO9	8.91082	2	0.0116156	0.0757844	3'UTR(F),3'UTR(M),3'UTR(L)	-0.192464	#N/A	#N/A	#N/A	#N/A	0.00012166
ING1	6.3624	1	0.0116564	0.0759157	3'UTR(F),3'UTR(M)	-0.414528	#N/A	#N/A	#N/A	#N/A	0.0096662
CRBN	8.9004	2	0.0116762	0.0759157	Intron,3'UTR(M)	0.221194	#N/A	#N/A	#N/A	1	0.00028911
PGM3	10.9973	3	0.0117405	0.076201	Intron,3'UTR(L)	0.0758699	0.27799	0.265548	0.676485	#N/A	1.4641e-05
TMEM199	6.34365	1	0.0117802	0.0762298	3'UTR(F),3'UTR(M)	-0.291395	#N/A	#N/A	#N/A	#N/A	1.9938e-05
TRAPPC10	8.8803	2	0.0117942	0.0762298	Intron,3'UTR(F),3'UTR(L)	-0.230578	-0.412233	0.737092	0.913983	#N/A	0.99999
NEDD9	6.33978	1	0.011806	0.0762298	3'UTR(M),3'UTR(L)	-0.352637	#N/A	#N/A	#N/A	#N/A	0.12634
TTC28-AS1	8.8685	2	0.011864	0.0763728	na	-0.0373366	#N/A	#N/A	#N/A	#N/A	#N/A
CNOT2	6.32876	1	0.0118795	0.0763728	3'UTR(M)	-0.0745307	1.79042	0.305435	0.701995	#N/A	0.99981
JPX	6.32731	1	0.0118893	0.0763728	na	-0.30565	#N/A	#N/A	#N/A	#N/A	#N/A
HSPA13	6.32336	1	0.0119158	0.076412	3'UTR(F),3'UTR(M)	-0.145597	1.82446	0.0512431	0.432104	#N/A	0.016897
ST8SIA2	8.84048	2	0.0120313	0.0770104	3'UTR(M),3'UTR(L)	0.0374888	#N/A	#N/A	#N/A	#N/A	0.058099
CTTNBP2	6.30346	1	0.0120502	0.0770104	Intron,3'UTR(L)	0.757867	#N/A	#N/A	#N/A	1	1.7221e-11
ASH1L	6.29878	1	0.0120821	0.0770827	3'UTR(F),3'UTR(L)	0.116962	#N/A	#N/A	#N/A	#N/A	1
FKBP7	6.29545	1	0.0121049	0.0770964	3'UTR(M),3'UTR(L)	-0.123972	0.157019	0.749215	0.917136	#N/A	4.1828e-08
GPD2	8.8217	2	0.0121449	0.0772199	3'UTR(F),3'UTR(M)	-0.118429	0.715944	0.0933712	0.525801	#N/A	8.1316e-11
LRRFIP2	8.81488	2	0.0121863	0.0773522	Intron,3'UTR(F),3'UTR(M)	-0.283653	1.10523	0.122193	0.555041	#N/A	2.5833e-25
KIAA1958	10.9054	3	0.0122484	0.0776148	Intron,3'UTR(M),3'UTR(L)	0.0810773	#N/A	#N/A	#N/A	#N/A	0.011171
ZNF737	6.26821	1	0.0122923	0.0777614	Intron,3'UTR(M)	0.42917	#N/A	#N/A	#N/A	#N/A	0.00041409
MPP2	6.24432	1	0.0124592	0.0786844	3'UTR(M),3'UTR(L)	-0.241343	2.23078	0.213777	0.641501	#N/A	2.876e-07
GPC4	8.76623	2	0.0124864	0.078723	3'UTR(M)	-0.114635	0.120604	0.698005	0.905961	#N/A	0.92613
RBM25	10.8512	3	0.0125584	0.079044	CDS,3'UTR(M)	-0.118004	0.0452744	0.893032	0.967886	#N/A	1
GOLPH3L	8.74773	2	0.0126025	0.0791883	3'UTR(M)	-0.296831	-1.59847	0.435236	0.773591	#N/A	1.2615e-05
BIRC5	8.73131	2	0.0127063	0.0797073	3'UTR(M)	-0.2441	#N/A	#N/A	#N/A	#N/A	0.055854
AKR1C1	6.18277	1	0.0129	0.0807867	Intron,3'UTR(S)	-0.215701	-5.94763	0.0424329	0.409862	#N/A	3.524e-15
TP53TG1	6.17304	1	0.0129711	0.0810355	na	-0.110066	#N/A	#N/A	#N/A	#N/A	#N/A
ITGAV	6.17143	1	0.012983	0.0810355	3'UTR(M),3'UTR(L)	0.121418	0.329976	0.328167	0.718431	#N/A	0.00022844
RNF170	6.16163	1	0.0130551	0.0810484	Intron	-0.329694	-0.562284	0.480164	0.797191	#N/A	0.51091
ING5	8.67711	2	0.0130554	0.0810484	3'UTR(M),3'UTR(L)	0.166595	#N/A	#N/A	#N/A	#N/A	0.61851
CTPS2	6.16084	1	0.0130609	0.0810484	3'UTR(M),3'UTR(L)	0.194937	-0.277781	0.329946	0.718823	#N/A	0.81923
NCLN	6.15939	1	0.0130716	0.0810484	3'UTR(F),3'UTR(M),3'UTR(L)	-0.109591	1.30948	0.0310668	0.381866	#N/A	0.7551
ALDH6A1	8.6684	2	0.0131123	0.0811664	3'UTR(M),3'UTR(L)	0.0596651	-0.110003	0.767067	0.923811	#N/A	7.5619e-10
MFSD14C	6.14881	1	0.0131501	0.0812658	na	0.30081	#N/A	#N/A	#N/A	#N/A	#N/A
PDE4D	8.65479	2	0.0132019	0.0814436	3'UTR(M),3'UTR(L)	-0.0456476	-0.149887	0.896318	0.96807	1	0.9998
CMIP	6.13911	1	0.0132224	0.0814436	3'UTR(M),3'UTR(L)	-0.132453	-0.433327	0.662608	0.893904	#N/A	0.99999
BTF3L4	6.13341	1	0.0132651	0.0815725	3'UTR(F),3'UTR(M)	-0.204057	-0.348009	0.398503	0.747305	#N/A	0.57136
CALM1	8.64092	2	0.0132938	0.0816152	3'UTR(F),3'UTR(M)	-0.0928478	0.284822	0.164112	0.593668	#N/A	0.94473
ZNF395	6.11386	1	0.0134126	0.0822097	3'UTR(F),3'UTR(L)	-0.0897196	#N/A	#N/A	#N/A	#N/A	0.30888
GRSF1	6.09987	1	0.0135192	0.0827278	3'UTR(F),3'UTR(M)	-0.261067	0.566385	0.177984	0.611171	#N/A	1.066e-11
COA5	6.08094	1	0.0136648	0.0833744	3'UTR(M)	-0.298499	#N/A	#N/A	#N/A	#N/A	0.018348
TIMM50	6.08035	1	0.0136694	0.0833744	3'UTR(F),3'UTR(M)	-0.124379	-0.11824	0.737558	0.913983	#N/A	0.0017835
PDS5A	10.6599	3	0.0137143	0.0835124	Intron,3'UTR(M),3'UTR(L)	0.0647295	1.54379	0.278828	0.682501	#N/A	1
ERGIC2	6.05604	1	0.0138588	0.0842553	3'UTR(M)	0.106637	#N/A	#N/A	#N/A	#N/A	0.013458
GOLT1B	6.04838	1	0.0139191	0.0844839	3'UTR(F),3'UTR(M)	-0.379448	#N/A	#N/A	#N/A	#N/A	0.85264
CUL3	6.04348	1	0.0139577	0.0844839	3'UTR(M)	-0.211115	0.111897	0.742193	0.916633	#N/A	0.9996
EXOSC6	8.54253	2	0.0139641	0.0844839	3'UTR(M),3'UTR(L)	-0.338596	-0.543486	0.293332	0.694242	#N/A	0.52473
CCSER2	8.52504	2	0.0140868	0.0850887	3'UTR(F),3'UTR(M)	-0.0257156	#N/A	#N/A	#N/A	#N/A	0.66698
PIAS4	6.02206	1	0.0141281	0.0851773	3'UTR(F),3'UTR(L)	0.181217	-0.720201	0.110189	0.540338	#N/A	0.99986
KRI1	6.01971	1	0.0141469	0.0851773	3'UTR(F),3'UTR(L)	-0.113857	#N/A	#N/A	#N/A	#N/A	6.0373e-15
TOMM20	5.99266	1	0.0143656	0.0863548	3'UTR(M)	-0.226407	-2.55262	0.274098	0.679394	#N/A	0.026672
NFE2L1	5.98369	1	0.0144387	0.0866389	3'UTR(M)	-0.152944	#N/A	#N/A	#N/A	#N/A	0.99759
DFFA	10.5429	3	0.0144726	0.0866389	Intron,3'UTR(M),3'UTR(L)	0.0537402	-0.0705119	0.842445	0.945709	#N/A	8.6585e-05
FAM192A	8.46967	2	0.0144822	0.0866389	3'UTR(F),3'UTR(M),3'UTR(L)	-0.0245249	-3.23271	0.0831918	0.502665	#N/A	0.19472
CD164	8.45534	2	0.0145863	0.0870012	Intron,3'UTR(M)	-0.16453	#N/A	#N/A	#N/A	#N/A	0.48906
EHMT1	5.9654	1	0.0145893	0.0870012	3'UTR(F),3'UTR(M),3'UTR(L)	-0.115957	#N/A	#N/A	#N/A	1	1
LRRC59	5.95849	1	0.0146466	0.0872043	3'UTR(M)	-0.162618	0.765618	0.0044676	0.28072	#N/A	0.43432
MTMR2	10.513	3	0.0146731	0.0872233	Intron,3'UTR(F),3'UTR(M)	0.0170071	1.27188	0.134783	0.565884	#N/A	3.0351e-07
SPPL2A	5.94906	1	0.0147251	0.0873236	3'UTR(M),3'UTR(L)	-0.307594	0.574513	0.591994	0.859301	#N/A	0.028995
RFK	5.94769	1	0.0147366	0.0873236	3'UTR(M),3'UTR(L)	-0.258965	#N/A	#N/A	#N/A	#N/A	0.063854
TRAF6	10.4813	3	0.014888	0.0880816	3'UTR(F),3'UTR(M),3'UTR(L)	-0.319632	-1.179	0.222723	0.648997	#N/A	0.99739
CD109	5.92522	1	0.0149257	0.0881651	3'UTR(F),3'UTR(L)	-0.442441	-0.394908	0.673413	0.898099	#N/A	2.2707e-44
GUCY1A3	5.92056	1	0.0149652	0.0882592	3'UTR(F),3'UTR(M)	-0.455318	#N/A	#N/A	#N/A	#N/A	3.1253e-08
SYT1	5.91474	1	0.0150147	0.0883614	Intron,3'UTR(S)	0.120749	5.009	0.123883	0.557141	#N/A	0.60038
NUFIP2	12.3345	4	0.0150297	0.0883614	3'UTR(M),3'UTR(L)	-0.045877	0.135828	0.782633	0.929442	#N/A	0.99891
AKIRIN2	8.38236	2	0.0151284	0.0888025	Intron,3'UTR(F),3'UTR(M),3'UTR(L)	-0.00462193	#N/A	#N/A	#N/A	#N/A	0.92355
BMP2K	8.36316	2	0.0152744	0.0895126	Intron,3'UTR(F),3'UTR(L)	0.17639	#N/A	#N/A	#N/A	#N/A	0.21901
OSBPL3	8.36017	2	0.0152972	0.0895126	3'UTR(F),3'UTR(M),3'UTR(L)	0.033139	0.336606	0.799774	0.935322	#N/A	1.585e-06
PACSIN2	5.86556	1	0.0154399	0.0902067	3'UTR(M),3'UTR(L)	-0.126518	0.403768	0.119924	0.552475	#N/A	0.21345
MSRB1	5.84857	1	0.0155898	0.0909402	3'UTR(F),3'UTR(M)	0.255279	#N/A	#N/A	#N/A	#N/A	0.1304
PARVA	10.3598	3	0.0157425	0.0916887	3'UTR(F),3'UTR(M),3'UTR(L)	-0.0994435	0.0817561	0.70947	0.90779	#N/A	0.40854
EIF4E2	8.29171	2	0.0158299	0.091984	Intron,3'UTR(M)	0.0962488	1.33747	0.0793833	0.492199	#N/A	0.58161
ARSA	8.29013	2	0.0158424	0.091984	3'UTR(F),3'UTR(M)	-0.206276	0.964413	0.311352	0.706487	#N/A	1.0893e-11
PCDH15	5.81701	1	0.0158719	0.092013	Intron	0.276297	#N/A	#N/A	#N/A	#N/A	8.0283e-25
SNX2	5.80715	1	0.0159612	0.0923872	3'UTR(F),3'UTR(M)	-0.209746	-0.123227	0.595685	0.861645	#N/A	0.98462
SSH2	5.79699	1	0.0160536	0.0927434	Intron,3'UTR(L)	-0.254078	#N/A	#N/A	#N/A	#N/A	0.99684
PPP6R3	5.79304	1	0.0160898	0.0927434	Intron,3'UTR(S)	-0.148903	-0.744637	0.256668	0.671863	#N/A	0.99487
FERMT2	5.79225	1	0.016097	0.0927434	3'UTR(F),3'UTR(M)	-0.133194	-0.0751171	0.690681	0.903307	#N/A	0.99999
FAM13C	5.78777	1	0.0161381	0.0928372	Intron,3'UTR(S)	0.68111	#N/A	#N/A	#N/A	#N/A	5.8127e-05
TMED4	10.297	3	0.016203	0.0930676	Intron,3'UTR(M)	-0.00496031	0.187438	0.746495	0.916767	#N/A	0.24339
STX18	5.76874	1	0.0163137	0.0935602	3'UTR(F),3'UTR(L)	0.177879	#N/A	#N/A	#N/A	#N/A	2.4881e-07
SPRED1	5.76108	1	0.016385	0.0936849	3'UTR(M)	0.220634	#N/A	#N/A	#N/A	1	0.97246
TMED5	5.76027	1	0.0163926	0.0936849	3'UTR(M)	-0.321043	2.6355	0.0511008	0.432104	#N/A	5.2721e-09
ARHGEF12	5.75787	1	0.0164149	0.0936849	3'UTR(F),3'UTR(M)	-0.184054	0.806626	0.396234	0.745439	#N/A	1
DEDD	8.21662	2	0.0164355	0.0936849	3'UTR(M),3'UTR(L)	0.156752	#N/A	#N/A	#N/A	#N/A	0.95912
HERC4	5.73615	1	0.0166192	0.094588	3'UTR(M),3'UTR(L)	0.174793	0.750696	0.230478	0.655208	#N/A	0.99961
POLDIP2	8.17953	2	0.0167432	0.0951491	3'UTR(M)	0.17473	-0.178118	0.779118	0.928912	#N/A	0.41407
PRMT7	5.71383	1	0.0168318	0.0955074	Intron,3'UTR(F)	-0.33915	#N/A	#N/A	#N/A	#N/A	5.5036e-15
SORT1	5.70633	1	0.0169038	0.0956458	3'UTR(M),3'UTR(L)	-0.242456	4.73098	0.00220469	0.233027	#N/A	0.99987
ABHD13	5.70598	1	0.0169072	0.0956458	3'UTR(M),3'UTR(L)	-0.28212	#N/A	#N/A	#N/A	#N/A	0.8946
BPTF	8.14444	2	0.0170396	0.0959187	Intron,3'UTR(F),3'UTR(M)	-0.022511	-1.21299	0.673772	0.898099	#N/A	1
PHF14	8.14364	2	0.0170463	0.0959187	Intron	0.144963	3.44163	0.0555359	0.447153	#N/A	0.26533
RAB31	5.6911	1	0.0170511	0.0959187	3'UTR(F),3'UTR(M),3'UTR(L)	-0.123074	6.517	0.0271441	0.363198	#N/A	0.0012566
SMCHD1	5.69041	1	0.0170579	0.0959187	3'UTR(M),3'UTR(L)	-0.235356	0.536984	0.428601	0.769	#N/A	1
TMTC3	10.1799	3	0.0170972	0.0959956	3'UTR(F),3'UTR(M),3'UTR(L)	-0.0679106	0.0169383	0.979266	0.993749	#N/A	4.6335e-05
IDI1	5.67897	1	0.0171695	0.096257	Intron,3'UTR(L)	-0.0948561	#N/A	#N/A	#N/A	#N/A	3.9769e-05
NEO1	5.67632	1	0.0171954	0.0962582	3'UTR(F),3'UTR(M),3'UTR(L)	-0.127678	2.26678	0.283003	0.686469	#N/A	0.24398
FAM133A	5.66616	1	0.0172953	0.0966023	Intron,3'UTR(S)	-0.346147	#N/A	#N/A	#N/A	#N/A	0.39581
KIAA0391	5.6636	1	0.0173205	0.0966023	3'UTR(F),3'UTR(M)	-0.135414	#N/A	#N/A	#N/A	#N/A	1.3271e-13
PTPRD	5.66221	1	0.0173342	0.0966023	3'UTR(F),3'UTR(L)	-0.32034	-0.529451	0.759247	0.918958	#N/A	1
TMEM101	5.65468	1	0.0174089	0.096874	3'UTR(F),3'UTR(M)	-0.203493	#N/A	#N/A	#N/A	#N/A	0.0017385
MAN2A1	5.64745	1	0.0174808	0.0970731	3'UTR(F),3'UTR(M)	-0.176518	1.60394	0.113999	0.540338	#N/A	1.6205e-10
STC2	5.64587	1	0.0174965	0.0970731	3'UTR(M),3'UTR(L)	-0.10224	#N/A	#N/A	#N/A	#N/A	0.26588
CLN8	5.64278	1	0.0175274	0.0971009	3'UTR(F),3'UTR(M)	-0.349016	2.56752	0.249278	0.6674	1	0.0035591
CHTOP	5.63028	1	0.0176528	0.0976508	3'UTR(F),3'UTR(M)	-0.14093	-0.21638	0.639409	0.885172	#N/A	0.76399
ZNF529	8.06454	2	0.0177341	0.0978527	Intron,3'UTR(M),3'UTR(L)	0.0431479	#N/A	#N/A	#N/A	#N/A	5.3601e-05
NRIP1	5.62011	1	0.0177555	0.0978527	3'UTR(M),3'UTR(L)	-0.0605043	#N/A	#N/A	#N/A	#N/A	0.99394
TFPI2	5.61638	1	0.0177934	0.0978527	3'UTR(M)	-0.0828318	#N/A	#N/A	#N/A	#N/A	0.00084274
CRIPT	10.0928	3	0.0177938	0.0978527	3'UTR(F),3'UTR(M)	-0.214304	#N/A	#N/A	#N/A	#N/A	0.00097752
GDE1	8.05349	2	0.0178323	0.0979209	3'UTR(F),3'UTR(M),3'UTR(L)	0.0568049	#N/A	#N/A	#N/A	#N/A	6.1163e-06
DDX46	5.60684	1	0.0178905	0.0980967	3'UTR(F),3'UTR(M),3'UTR(L)	-0.332586	0.0080788	0.986719	0.995913	#N/A	1
PDLIM5	8.01223	2	0.018204	0.0996697	Intron,3'UTR(M)	0.175884	-0.162233	0.40999	0.755787	#N/A	0.0016769
ELMOD2	8.00511	2	0.0182689	0.0998787	3'UTR(F),CDS,3'UTR(M)	-0.077068	-0.0333087	0.91016	0.973447	#N/A	0.41822
UBE2A	5.56561	1	0.0183166	0.0999939	3'UTR(F),3'UTR(L)	-0.14997	0.759571	0.057504	0.451478	1	0.815
DCLK1	7.99631	2	0.0183495	0.100027	Intron,3'UTR(M),3'UTR(L)	0.200297	0.793325	0.0431265	0.410707	#N/A	0.99964
OTUD6B-AS1	5.52865	1	0.0187075	0.101831	na	0.170132	#N/A	#N/A	#N/A	#N/A	#N/A
KPNA4	9.9746	3	0.0187833	0.102095	3'UTR(M),3'UTR(L)	0.0217852	-0.0661062	0.858899	0.952171	#N/A	0.99989
STYX	5.51306	1	0.018875	0.102445	3'UTR(M),3'UTR(L)	0.348551	#N/A	#N/A	#N/A	#N/A	0.37747
MAPK9	7.93348	2	0.0189351	0.102477	3'UTR(F),3'UTR(M),3'UTR(L)	0.326027	-0.125785	0.692272	0.903307	#N/A	0.069738
IVNS1ABP	7.93342	2	0.0189356	0.102477	3'UTR(M)	-0.10594	2.125	0.100342	0.531264	#N/A	0.99442
WNK2	7.92671	2	0.0189993	0.102673	Intron,3'UTR(S)	-0.124917	#N/A	#N/A	#N/A	#N/A	1
CECR2	5.49567	1	0.0190637	0.102872	Intron,3'UTR(L)	-0.322389	#N/A	#N/A	#N/A	#N/A	1
TRIO	9.93822	3	0.0190986	0.102913	Intron,3'UTR(F),3'UTR(M),3'UTR(L)	0.0555696	1.42136	0.0997856	0.5312	1	1
MAF	5.47985	1	0.0192369	0.103509	Intron,3'UTR(S)	0.101934	#N/A	#N/A	#N/A	#N/A	0.74382
CSGALNACT1	7.89317	2	0.0193206	0.10381	Intron,3'UTR(L)	-0.313644	#N/A	#N/A	#N/A	#N/A	9.2684e-14
TLE3	7.88907	2	0.0193602	0.103874	3'UTR(F),3'UTR(M)	-0.18719	-3.64236	0.294583	0.694242	#N/A	1
CACNB1	5.466	1	0.0193899	0.103884	Intron,3'UTR(S)	0.874463	#N/A	#N/A	#N/A	#N/A	0.78689
WEE1	5.46012	1	0.0194553	0.104086	3'UTR(F),3'UTR(M)	-0.192888	#N/A	#N/A	#N/A	#N/A	0.99973
PCNP	7.85027	2	0.0197394	0.105455	CDS,3'UTR(M)	-0.113715	-0.280183	0.207875	0.635936	#N/A	0.78553
ZFP64	5.42972	1	0.0197969	0.105612	Intron,3'UTR(F),3'UTR(M)	0.315714	#N/A	#N/A	#N/A	#N/A	0.00016534
BCAS3	7.8191	2	0.0200495	0.106807	Intron,3'UTR(M)	0.0971707	0.506119	0.545074	0.834409	#N/A	0.00013819
PATL1	5.39833	1	0.020156	0.107101	3'UTR(M),3'UTR(L)	-0.140482	-0.0512626	0.94968	0.986229	#N/A	0.964
CLGN	5.39783	1	0.0201618	0.107101	3'UTR(F),CDS,3'UTR(M)	0.670763	#N/A	#N/A	#N/A	#N/A	1.2813e-11
PPFIBP1	5.3919	1	0.0202304	0.107313	3'UTR(F),3'UTR(L)	-0.234964	-0.172641	0.749428	0.917173	#N/A	5.1485e-16
EPC2	7.79183	2	0.0203247	0.107661	3'UTR(F),3'UTR(M)	-0.0504226	#N/A	#N/A	#N/A	#N/A	0.99998
GID8	5.3764	1	0.0204109	0.107931	3'UTR(F),3'UTR(M)	-0.26282	-1.69396	0.267869	0.677065	#N/A	0.93963
SPSB1	5.37448	1	0.0204335	0.107931	3'UTR(F),3'UTR(L)	-0.0752564	#N/A	#N/A	#N/A	#N/A	0.51982
SEC63	7.77396	2	0.0205072	0.108105	3'UTR(F),3'UTR(M),3'UTR(L)	-0.161747	0.641828	0.150279	0.580946	#N/A	2.0818e-07
TPP2	5.36676	1	0.020524	0.108105	3'UTR(F),3'UTR(M)	-0.18584	-0.574955	0.168821	0.596996	#N/A	0.99912
DDR2	7.76908	2	0.0205573	0.108128	3'UTR(F),3'UTR(M),3'UTR(L)	-0.119688	#N/A	#N/A	#N/A	#N/A	0.5503
XIAP	7.7637	2	0.0206127	0.108267	3'UTR(F),3'UTR(M),3'UTR(L)	0.296342	-0.749919	0.453568	0.783264	#N/A	0.91837
ATP6V0A2	7.75967	2	0.0206542	0.108333	3'UTR(F),3'UTR(M),3'UTR(L)	-0.264079	#N/A	#N/A	#N/A	1	2.6314e-11
ARL10	5.34716	1	0.020756	0.108715	3'UTR(M),3'UTR(L)	-0.23995	#N/A	#N/A	#N/A	#N/A	0.00082222
POLR3D	7.72032	2	0.0210646	0.110028	3'UTR(F),3'UTR(M)	-0.257582	#N/A	#N/A	#N/A	#N/A	3.8286e-11
CENPF	5.32137	1	0.0210655	0.110028	3'UTR(F),3'UTR(M)	-0.481032	#N/A	#N/A	#N/A	#N/A	1.8822e-36
WWTR1	7.71106	2	0.0211624	0.11008	3'UTR(F),3'UTR(M),3'UTR(L)	-0.0966515	-1.84974	0.116402	0.546971	#N/A	0.93914
TANGO6	5.31328	1	0.0211635	0.11008	3'UTR(F),3'UTR(L)	0.479546	#N/A	#N/A	#N/A	#N/A	6.3244e-14
TCFL5	7.71095	2	0.0211636	0.11008	Intron,3'UTR(M),3'UTR(L)	-0.151051	#N/A	#N/A	#N/A	#N/A	0.99128
LRIG2	7.69257	2	0.0213589	0.110942	3'UTR(F),3'UTR(M),3'UTR(L)	-0.16023	#N/A	#N/A	#N/A	#N/A	7.9705e-18
RFX4	5.26972	1	0.0216994	0.112555	Intron,3'UTR(S)	-0.284347	#N/A	#N/A	#N/A	#N/A	0.99999
ARL1	7.64849	2	0.0218349	0.113029	3'UTR(F),3'UTR(M),3'UTR(L)	-0.29227	-0.214529	0.6483	0.886904	#N/A	0.093716
RABEP1	9.64366	3	0.0218512	0.113029	3'UTR(F),3'UTR(M),3'UTR(L)	-0.150791	0.105964	0.802394	0.936751	#N/A	0.99851
CSNK1G3	5.25319	1	0.0219065	0.113037	3'UTR(M)	-0.19868	#N/A	#N/A	#N/A	#N/A	0.99947
CALM3	5.25162	1	0.0219264	0.113037	3'UTR(F),3'UTR(L)	-0.0665453	0.284822	0.164112	0.593668	#N/A	0.92749
SCD	5.25027	1	0.0219434	0.113037	3'UTR(M)	-0.132065	2.48184	0.167256	0.59618	#N/A	0.96968
ANKRD13C	9.62598	3	0.0220282	0.113318	Intron,3'UTR(M)	-0.188183	#N/A	#N/A	#N/A	#N/A	0.99793
VPS13D	7.62373	2	0.022107	0.113567	3'UTR(F),3'UTR(M),3'UTR(L)	0.164368	#N/A	#N/A	#N/A	#N/A	1.0749e-06
WNK1	5.23382	1	0.0221518	0.113642	3'UTR(F),3'UTR(M)	-0.166246	-0.186991	0.676491	0.898099	#N/A	1
SEC24A	5.22552	1	0.0222578	0.114029	3'UTR(F),3'UTR(L)	-0.207771	0.571356	0.400927	0.750191	#N/A	8.7713e-09
COMMD5	5.21582	1	0.0223823	0.114495	3'UTR(F),3'UTR(L)	-0.136302	#N/A	#N/A	#N/A	#N/A	1.497e-05
FAM160B1	5.20979	1	0.0224601	0.114495	Intron	-0.503649	0.443062	0.4954	0.806358	#N/A	0.99898
MKKS	5.20917	1	0.022468	0.114495	3'UTR(F),5UTR	-0.308746	#N/A	#N/A	#N/A	1	2.1265e-09
VPS54	5.20894	1	0.022471	0.114495	3'UTR(M),3'UTR(L)	-0.287775	#N/A	#N/A	#N/A	#N/A	0.99929
COA7	5.20479	1	0.0225247	0.114613	3'UTR(F),3'UTR(M),3'UTR(L)	-0.425811	#N/A	#N/A	#N/A	#N/A	0.059686
RAB2A	7.57921	2	0.0226045	0.114863	3'UTR(F),3'UTR(M)	-0.130075	0.474168	0.00845633	0.307623	#N/A	0.98913
C7orf25	5.19048	1	0.0227109	0.115232	3'UTR(M),3'UTR(L)	0.238173	-2.9722	0.339734	0.724766	#N/A	0.35388
KIAA1468	5.18836	1	0.0227386	0.115232	3'UTR(F),3'UTR(L)	-0.223661	#N/A	#N/A	#N/A	#N/A	0.99993
CHKA	5.17745	1	0.0228819	0.115801	3'UTR(F),3'UTR(L)	-0.149011	#N/A	#N/A	#N/A	#N/A	0.22747
TTC7A	5.17395	1	0.0229281	0.115878	3'UTR(F),3'UTR(M)	-0.279211	#N/A	#N/A	#N/A	#N/A	1.5359e-31
PAPPA	7.54093	2	0.0230414	0.116294	3'UTR(F),3'UTR(M),3'UTR(L)	-0.0791515	#N/A	#N/A	#N/A	#N/A	0.1613
THOC2	7.52534	2	0.0232217	0.117046	Intron,3'UTR(F),3'UTR(L)	0.111399	0.674095	0.504235	0.812319	#N/A	1
BAIAP2	7.52038	2	0.0232793	0.117071	Intron	-0.118568	2.50537	0.0126031	0.323029	#N/A	0.46155
BACH2	7.51954	2	0.0232891	0.117071	Intron,3'UTR(F),3'UTR(L)	-0.232284	#N/A	#N/A	#N/A	#N/A	0.99803
LACTB	5.1367	1	0.0234252	0.11747	Intron,3'UTR(F)	0.436049	#N/A	#N/A	#N/A	#N/A	1.975e-06
VPS53	9.49062	3	0.0234313	0.11747	3'UTR(M)	0.0207648	1.24811	0.135876	0.567118	#N/A	1.3999e-07
ARMC8	9.47569	3	0.0235914	0.118115	Intron,3'UTR(F),3'UTR(M)	-0.157163	0.688452	0.475517	0.794173	#N/A	0.99999
ARPP19	5.11546	1	0.0237136	0.118568	3'UTR(F),3'UTR(M),3'UTR(L)	-0.138972	-0.533485	0.178151	0.611171	#N/A	0.77371
SQSTM1	5.0974	1	0.0239617	0.119649	3'UTR(F),3'UTR(M)	0.127177	0.57479	0.0845641	0.503752	#N/A	0.00086035
EPG5	5.0945	1	0.0240019	0.11969	3'UTR(M),3'UTR(L)	0.208277	#N/A	#N/A	#N/A	#N/A	1.3508e-13
PHKB	7.45325	2	0.0240739	0.119769	3'UTR(F),3'UTR(M),3'UTR(L)	0.236912	-0.158544	0.895413	0.967886	#N/A	1.581e-21
METTL14	7.45261	2	0.0240817	0.119769	3'UTR(M)	0.103383	#N/A	#N/A	#N/A	#N/A	0.0013331
LRRC27	5.08494	1	0.0241345	0.119769	Intron,3'UTR(S)	-0.468833	#N/A	#N/A	#N/A	#N/A	1.0059e-17
XPOT	5.08414	1	0.0241456	0.119769	3'UTR(M),3'UTR(L)	-0.133288	-0.241733	0.313787	0.708368	#N/A	0.99711
SUV39H2	7.43605	2	0.0242818	0.120171	3'UTR(M),3'UTR(L)	-0.165785	#N/A	#N/A	#N/A	#N/A	0.92921
ZNF292	7.43531	2	0.0242909	0.120171	CDS,3'UTR(M)	-0.0439128	#N/A	#N/A	#N/A	1	1
OSER1	7.42201	2	0.0244529	0.120643	3'UTR(F),3'UTR(M),3'UTR(L)	-0.205896	#N/A	#N/A	#N/A	#N/A	0.0028566
ARL14EP	5.05883	1	0.0245008	0.120643	3'UTR(F),3'UTR(M)	-0.250408	#N/A	#N/A	#N/A	#N/A	0.37864
FAM161B	5.05796	1	0.024513	0.120643	3'UTR(M),3'UTR(L)	0.304486	#N/A	#N/A	#N/A	#N/A	1.0758e-13
BRI3BP	7.41693	2	0.0245151	0.120643	3'UTR(F),3'UTR(M),3'UTR(L)	-0.165305	4.35501	0.0173009	0.335625	#N/A	0.064384
RETREG1	5.04281	1	0.0247284	0.121178	3'UTR(F),3'UTR(M)	-0.164622	#N/A	#N/A	#N/A	#N/A	#N/A
CUL5	7.39915	2	0.024734	0.121178	Intron,3'UTR(F),3'UTR(M)	-0.0126873	-0.204151	0.566734	0.844518	#N/A	1
MCL1	5.04198	1	0.0247403	0.121178	3'UTR(M)	-0.113985	#N/A	#N/A	#N/A	#N/A	0.96349
TRIM23	5.04106	1	0.0247534	0.121178	3'UTR(M)	-0.154868	0.717529	0.56564	0.844518	#N/A	0.0003937
CLK4	5.03433	1	0.0248497	0.121491	3'UTR(M),3'UTR(L)	-0.32652	#N/A	#N/A	#N/A	#N/A	6.1931e-05
TET1	5.02898	1	0.0249265	0.121708	Intron,3'UTR(M)	-0.265453	#N/A	#N/A	#N/A	#N/A	1
INPP5F	5.01068	1	0.0251914	0.122748	3'UTR(F),CDS,3'UTR(L)	-0.193763	2.29378	0.154934	0.588161	#N/A	2.3623e-07
VKORC1L1	11.124	4	0.0252051	0.122748	3'UTR(M),3'UTR(L)	-0.0522066	0.0683596	0.933202	0.980609	#N/A	0.84443
FZD7	5.00228	1	0.0253139	0.123118	3'UTR(F),3'UTR(M)	-0.332892	#N/A	#N/A	#N/A	#N/A	0.08835
AMD1	7.34684	2	0.0253895	0.12323	3'UTR(M)	-0.0909871	#N/A	#N/A	#N/A	#N/A	0.98227
SPG20	7.3458	2	0.0254027	0.12323	3'UTR(M),3'UTR(L)	0.0795613	#N/A	#N/A	#N/A	#N/A	2.967e-07
CCDC82	4.98956	1	0.0255008	0.12349	3'UTR(M),3'UTR(L)	-0.192552	#N/A	#N/A	#N/A	#N/A	2.383e-07
SURF6	4.98809	1	0.0255223	0.12349	3'UTR(M)	0.144386	-2.47291	0.0357005	0.388272	#N/A	6.449e-07
GSE1	4.98239	1	0.0256066	0.123684	3'UTR(M),3'UTR(L)	-0.194677	#N/A	#N/A	#N/A	1	1
ORMDL2	4.98091	1	0.0256285	0.123684	3'UTR(F),3'UTR(M)	0.124498	2.71904	0.130354	0.563442	#N/A	0.19417
MRPL35	7.31683	2	0.0257733	0.124223	Intron,3'UTR(F),3'UTR(L)	-0.173732	#N/A	#N/A	#N/A	#N/A	0.0023926
PITRM1	4.95404	1	0.0260298	0.125297	Intron,3'UTR(M)	-0.118775	0.135159	0.788245	0.93173	#N/A	5.9266e-21
THSD7A	4.94285	1	0.0261988	0.125949	Intron,3'UTR(L)	0.650341	#N/A	#N/A	#N/A	#N/A	1
CACNA1C	4.9389	1	0.0262588	0.126076	3'UTR(F),3'UTR(M)	-0.505275	#N/A	#N/A	#N/A	#N/A	1
ADO	4.93167	1	0.0263688	0.126442	3'UTR(F),3'UTR(L)	0.278323	0.014263	0.98005	0.99419	#N/A	0.48027
SETX	7.26681	2	0.026426	0.126554	3'UTR(F),3'UTR(M)	-0.0673658	#N/A	#N/A	#N/A	#N/A	0.95483
COLGALT2	4.92373	1	0.0264902	0.1267	Intron	0.256157	0.430646	0.349839	0.727179	#N/A	1.0935e-10
GRPEL1	4.91446	1	0.0266327	0.127219	3'UTR(M),3'UTR(L)	-0.123329	0.786975	0.105246	0.536111	#N/A	0.13916
PPHLN1	4.9111	1	0.0266847	0.127305	Intron,3'UTR(M)	0.110267	#N/A	#N/A	#N/A	#N/A	3.3043e-08
PRIMPOL	4.9058	1	0.0267667	0.127533	Intron,3'UTR(S)	0.212381	#N/A	#N/A	#N/A	#N/A	1.3322e-18
ARMCX3	4.88612	1	0.0270735	0.128831	3'UTR(F),3'UTR(M)	-0.218342	0.50733	0.515674	0.818453	#N/A	0.45882
USO1	4.88118	1	0.027151	0.128849	3'UTR(F),3'UTR(M)	0.158363	-0.390903	0.128502	0.563084	#N/A	0.33417
M6PR	4.87979	1	0.0271729	0.128849	3'UTR(M),3'UTR(L)	-0.218528	1.05882	0.150378	0.580946	#N/A	0.0092215
IRF2BPL	4.87875	1	0.0271893	0.128849	3'UTR(M),3'UTR(L)	-0.146625	-0.0276858	0.961337	0.990067	#N/A	0.83623
DHODH	4.87713	1	0.0272148	0.128849	3'UTR(F),3'UTR(L)	-0.501492	-1.25289	0.259114	0.674047	#N/A	0.0029884
SIRT3	7.19638	2	0.0273733	0.129436	3'UTR(M),3'UTR(L)	-0.109403	0.193242	0.769322	0.925411	#N/A	0.00016261
NUTF2	4.86419	1	0.0274196	0.129491	3'UTR(F),3'UTR(L)	-0.344276	-0.0120586	0.944913	0.985124	#N/A	0.93864
LOC100419583	4.85923	1	0.0274986	0.129701	na	-0.242576	#N/A	#N/A	#N/A	#N/A	#N/A
DEF8	4.84721	1	0.0276909	0.130443	Intron,3'UTR(S)	-0.127676	#N/A	#N/A	#N/A	#N/A	0.0025904
LONRF2	4.83412	1	0.0279019	0.131159	3'UTR(F),3'UTR(L)	-0.125067	#N/A	#N/A	#N/A	#N/A	0.0011706
CBFB	4.83343	1	0.027913	0.131159	3'UTR(M)	-0.104031	0.252331	0.342753	0.727166	#N/A	0.9589
CLPB	4.83034	1	0.027963	0.13123	3'UTR(M)	0.291692	1.94649	0.251948	0.667926	#N/A	0.00049945
SNAPIN	4.82612	1	0.0280316	0.131387	3'UTR(F),3'UTR(M)	-0.102685	-0.381103	0.336696	0.722613	#N/A	0.0015332
PCDH17	4.81862	1	0.0281539	0.131707	Intron,3'UTR(L)	0.82868	#N/A	#N/A	#N/A	#N/A	0.64056
NSG1	4.81762	1	0.0281702	0.131707	3'UTR(F),3'UTR(M)	-0.098953	#N/A	#N/A	#N/A	#N/A	0.0088286
TRIM37	4.81514	1	0.0282108	0.131733	Intron,3'UTR(S)	0.179279	#N/A	#N/A	#N/A	#N/A	9.7042e-12
LIFR	4.81235	1	0.0282565	0.131781	3'UTR(M),3'UTR(L)	-0.116827	#N/A	#N/A	#N/A	#N/A	1.4888e-13
ATP5S	9.07509	3	0.0283091	0.131862	3'UTR(F),CDS,3'UTR(M)	0.374809	#N/A	#N/A	#N/A	#N/A	6.451e-06
RHNO1	4.80057	1	0.0284504	0.132211	3'UTR(M)	-0.223174	#N/A	#N/A	#N/A	#N/A	0.0027455
SEC23IP	7.1189	2	0.0284545	0.132211	3'UTR(F),3'UTR(M)	-0.168317	-0.24465	0.632902	0.881039	#N/A	1.9318e-05
KIAA0825	7.11624	2	0.0284923	0.132223	Intron,3'UTR(L)	-0.338168	#N/A	#N/A	#N/A	#N/A	5.2834e-09
DENND1A	4.79157	1	0.0285994	0.132555	Intron,3'UTR(F)	0.292907	#N/A	#N/A	#N/A	#N/A	0.99976
MCPH1	4.77767	1	0.0288311	0.133464	Intron	-0.179009	#N/A	#N/A	#N/A	1	7.76e-30
RASAL2	9.02551	3	0.0289536	0.133866	Intron,3'UTR(M)	0.275878	#N/A	#N/A	#N/A	#N/A	0.79641
MRPL18	4.76644	1	0.0290197	0.134006	3'UTR(F),3'UTR(L)	-0.345943	#N/A	#N/A	#N/A	#N/A	0.00016217
PLSCR1	4.7539	1	0.0292319	0.13482	3'UTR(M)	-0.153347	#N/A	#N/A	#N/A	#N/A	0.011923
GNPNAT1	7.06117	2	0.0292878	0.134911	3'UTR(F),3'UTR(M),3'UTR(L)	-0.119896	#N/A	#N/A	#N/A	#N/A	0.012367
KIAA1328	4.74606	1	0.0293654	0.135102	Intron	0.862565	#N/A	#N/A	#N/A	#N/A	3.2984e-08
MPP6	4.74165	1	0.0294409	0.135283	3'UTR(F),3'UTR(M)	-0.395996	0.0274639	0.954697	0.989175	#N/A	0.81619
FAS	4.73832	1	0.0294978	0.135379	3'UTR(F),3'UTR(M)	-0.293252	0.245888	0.748251	0.916767	#N/A	0.8117
SERPINE1	4.72777	1	0.0296794	0.136046	3'UTR(M)	-0.247375	#N/A	#N/A	#N/A	#N/A	0.043609
REXO4	4.7202	1	0.0298104	0.136479	3'UTR(F),3'UTR(M)	-0.17808	#N/A	#N/A	#N/A	#N/A	8.7916e-07
TNRC6B	4.71771	1	0.0298535	0.13651	3'UTR(F),3'UTR(M)	-0.107344	0.49326	0.66908	0.896885	#N/A	1
PBK	4.71322	1	0.0299316	0.1367	3'UTR(M),3'UTR(L)	-0.42968	#N/A	#N/A	#N/A	#N/A	1.2188e-06
PRDM4	4.70078	1	0.030149	0.137428	3'UTR(M),3'UTR(L)	-0.188786	#N/A	#N/A	#N/A	#N/A	0.0013238
BCAP29	7.00219	2	0.0301644	0.137428	3'UTR(M)	-0.299579	#N/A	#N/A	#N/A	#N/A	0.25556
UHMK1	4.6952	1	0.030247	0.137637	3'UTR(M),3'UTR(L)	-0.225568	#N/A	#N/A	#N/A	#N/A	0.83404
PLEKHB2	4.68685	1	0.0303943	0.138055	3'UTR(F),3'UTR(M)	-0.12819	#N/A	#N/A	#N/A	#N/A	6.6904e-11
ZDHHC18	4.68582	1	0.0304126	0.138055	3'UTR(F),3'UTR(L)	-0.163535	#N/A	#N/A	#N/A	#N/A	0.0024011
ARID2	4.67693	1	0.0305704	0.138537	3'UTR(F),3'UTR(M)	-0.299937	#N/A	#N/A	#N/A	#N/A	1
OGFOD3	6.97398	2	0.0305928	0.138537	3'UTR(F),3'UTR(M),3'UTR(L)	0.283615	#N/A	#N/A	#N/A	#N/A	1.6332e-09
ARL5B	4.65915	1	0.0308885	0.139707	3'UTR(F),3'UTR(M),3'UTR(L)	-0.105665	3.596	0.11766	0.549232	#N/A	0.0017521
GTF3C4	4.65348	1	0.0309907	0.14	3'UTR(M),3'UTR(L)	0.370505	1.24281	0.282267	0.685347	#N/A	0.2592
SLC22A17	4.64315	1	0.0311777	0.140541	3'UTR(F),3'UTR(L)	-0.0806382	#N/A	#N/A	#N/A	#N/A	0.010603
ZBTB44	4.63912	1	0.031251	0.140541	Intron,3'UTR(L)	-0.117325	#N/A	#N/A	#N/A	#N/A	0.99929
DPY19L1	6.93096	2	0.0312581	0.140541	3'UTR(F),3'UTR(M)	-0.263712	1.3318	0.0923221	0.525801	#N/A	0.00013176
GINS2	6.93012	2	0.0312712	0.140541	3'UTR(M),3'UTR(L)	-0.0668177	#N/A	#N/A	#N/A	#N/A	1.5745e-08
ARFIP1	4.63654	1	0.031298	0.140541	Intron,3'UTR(M)	-0.0677224	-0.278126	0.498547	0.80807	#N/A	3.079e-05
WBP4	4.6252	1	0.0315057	0.141304	3'UTR(F),3'UTR(L)	-0.482246	#N/A	#N/A	#N/A	#N/A	3.9769e-08
RWDD4	4.62051	1	0.0315919	0.141388	3'UTR(F),3'UTR(L)	-0.403363	2.62494	0.295387	0.694242	#N/A	0.017447
ZBTB4	4.61433	1	0.0317059	0.141388	3'UTR(F),3'UTR(L)	0.30695	#N/A	#N/A	#N/A	#N/A	0.99991
MAN1A2	6.90106	2	0.0317288	0.141388	3'UTR(F),3'UTR(M)	0.132016	#N/A	#N/A	#N/A	#N/A	0.99892
CDH6	6.89914	2	0.0317593	0.141388	3'UTR(M),3'UTR(L)	-0.150403	#N/A	#N/A	#N/A	#N/A	0.91966
TM9SF4	4.61139	1	0.0317602	0.141388	3'UTR(F),3'UTR(M)	-0.165103	0.804276	0.731934	0.912478	#N/A	0.999
SLC33A1	6.89786	2	0.0317797	0.141388	Intron,3'UTR(F),3'UTR(M),3'UTR(L)	-0.415361	0.677593	0.290195	0.692477	1	9.8902e-05
SLC30A5	6.89553	2	0.0318167	0.141388	Intron,3'UTR(F),3'UTR(M)	0.241415	#N/A	#N/A	#N/A	#N/A	0.068068
GPT2	4.60656	1	0.0318498	0.141388	3'UTR(F),3'UTR(M),3'UTR(L)	-0.18262	1.81564	0.214378	0.641501	1	0.00034046
DHX36	6.89254	2	0.0318642	0.141388	Intron,3'UTR(M),3'UTR(L)	-0.280847	0.782489	0.549887	0.835568	#N/A	0.47221
SLAIN2	8.80966	3	0.0319316	0.141519	3'UTR(F),3'UTR(M),3'UTR(L)	-0.142783	0.717306	0.534192	0.8253	#N/A	0.79312
FAM8A1	6.8858	2	0.0319718	0.14153	3'UTR(M),3'UTR(L)	-0.126431	0.359465	0.685431	0.902561	#N/A	0.017471
QRICH1	4.58098	1	0.0323288	0.142941	3'UTR(F),3'UTR(M),3'UTR(L)	0.0775637	0.00695342	0.987351	0.995913	#N/A	0.99576
ENSA	8.77873	3	0.0323821	0.143003	Intron,3'UTR(F),3'UTR(L)	-0.0817933	0.865468	0.141811	0.571634	#N/A	0.34917
OPA1	8.77621	3	0.0324192	0.143003	3'UTR(F),3'UTR(M),3'UTR(L)	0.0926735	0.56603	0.114302	0.540338	#N/A	0.98636
TRA2B	4.5679	1	0.0325765	0.143363	3'UTR(M)	-0.109884	-0.23638	0.341552	0.72647	#N/A	0.99312
PDP1	6.84828	2	0.0325773	0.143363	3'UTR(F),3'UTR(M)	0.137059	0.49067	0.427992	0.768539	#N/A	0.45106
RSRC2	4.56548	1	0.0326226	0.143394	3'UTR(M)	-0.207458	2.93915	0.243007	0.664785	#N/A	0.99905
RARA	4.55748	1	0.0327754	0.143875	3'UTR(F),3'UTR(L)	-0.140749	#N/A	#N/A	#N/A	#N/A	0.96305
PFKFB2	6.83406	2	0.0328097	0.143875	Intron,3'UTR(S)	-0.225698	3.30087	0.0220168	0.347547	#N/A	2.3914e-07
TOX2	4.55373	1	0.0328472	0.143875	Intron,3'UTR(F)	0.16392	#N/A	#N/A	#N/A	#N/A	0.031987
RSPH3	4.55123	1	0.0328951	0.143916	Intron,3'UTR(S)	-0.221595	#N/A	#N/A	#N/A	#N/A	9.8725e-08
PCIF1	4.54875	1	0.0329427	0.143945	Intron,3'UTR(F),3'UTR(M)	0.660627	1.2689	0.330366	0.718823	#N/A	0.99999
TMX3	6.8238	2	0.0329785	0.143945	3'UTR(F),3'UTR(M),3'UTR(L)	-0.154076	0.75853	0.283287	0.686491	#N/A	0.0044014
GSK3B	6.79551	2	0.0334483	0.145825	3'UTR(M),3'UTR(L)	-0.171405	1.08708	0.0429763	0.410707	#N/A	0.95571
TRAF5	4.51839	1	0.0335325	0.146022	CDS,3'UTR(M)	-0.134992	#N/A	#N/A	#N/A	#N/A	1.6736e-12
RIC1	6.78185	2	0.0336776	0.146484	3'UTR(M)	-0.392674	#N/A	#N/A	#N/A	#N/A	#N/A
PEX10	6.75847	2	0.0340735	0.148034	3'UTR(M)	-0.0172354	#N/A	#N/A	#N/A	1	0.00054204
SERTAD2	4.489	1	0.0341136	0.148036	3'UTR(F),3'UTR(M),3'UTR(L)	-0.232836	#N/A	#N/A	#N/A	#N/A	0.8808
SDC1	4.48016	1	0.0342904	0.148632	3'UTR(M),3'UTR(L)	-0.0683562	0.100957	0.810718	0.9372	#N/A	0.0084118
HNRNPA0	4.47489	1	0.0343964	0.148919	3'UTR(M)	-0.0793656	0.138443	0.578766	0.852019	#N/A	0.91616
SAR1A	4.47209	1	0.0344529	0.148991	3'UTR(F),3'UTR(M)	-0.279658	-0.0587649	0.721764	0.907974	#N/A	0.37178
ZNF207	4.45856	1	0.0347267	0.149907	3'UTR(F),3'UTR(M)	-0.261564	-0.343468	0.458689	0.785638	#N/A	0.1046
WWC2	4.45768	1	0.0347447	0.149907	3'UTR(M)	-0.306824	#N/A	#N/A	#N/A	#N/A	1.5899e-07
CDC37L1	4.45565	1	0.034786	0.14991	3'UTR(F),3'UTR(M),3'UTR(L)	0.40218	#N/A	#N/A	#N/A	#N/A	0.96614
CAPRIN1	10.3552	4	0.034851	0.14991	Intron,3'UTR(F),3'UTR(M)	0.0245396	0.238683	0.255359	0.670221	#N/A	0.97247
ZDHHC17	4.44997	1	0.0349019	0.14991	3'UTR(M)	-0.165612	#N/A	#N/A	#N/A	#N/A	0.99989
SLC6A15	4.44979	1	0.0349056	0.14991	Intron,3'UTR(M)	-0.374104	#N/A	#N/A	#N/A	#N/A	0.00060384
SHANK2	4.44748	1	0.0349527	0.14994	3'UTR(M)	-0.265334	#N/A	#N/A	#N/A	1	8.4299e-07
SFT2D3	4.43134	1	0.0352847	0.151191	3'UTR(F),3'UTR(M)	-0.345019	#N/A	#N/A	#N/A	#N/A	0.1013
ZNF428	4.42228	1	0.0354725	0.151823	3'UTR(F),3'UTR(M)	-0.0574859	#N/A	#N/A	#N/A	#N/A	0.5013
BCL9L	4.41918	1	0.0355371	0.151925	3'UTR(M),3'UTR(L)	-0.140037	#N/A	#N/A	#N/A	#N/A	0.99939
GLCCI1	4.41479	1	0.0356286	0.152143	3'UTR(F),3'UTR(M)	-0.324241	#N/A	#N/A	#N/A	#N/A	0.05903
DNAJC21	4.41038	1	0.0357209	0.152363	3'UTR(F),3'UTR(M),3'UTR(L)	-0.257947	-1.1138	0.351007	0.727179	#N/A	2.1006e-07
SLC19A1	4.40738	1	0.0357837	0.15242	Intron,CDS,3'UTR(M)	-0.0721822	3.71449	0.0112071	0.315561	#N/A	6.4655e-06
FAM162A	4.40416	1	0.0358513	0.15242	3'UTR(F),3'UTR(M),3'UTR(L)	-0.129627	0.0457586	0.867706	0.955779	#N/A	3.2417e-06
DLG3	4.40392	1	0.0358563	0.15242	3'UTR(M),3'UTR(L)	-0.270352	#N/A	#N/A	#N/A	1	0.99999
PPARA	4.39855	1	0.0359695	0.152511	Intron,3'UTR(L)	0.722167	#N/A	#N/A	#N/A	#N/A	0.030182
DTWD1	4.39771	1	0.0359872	0.152511	CDS,3'UTR(M)	-0.150693	#N/A	#N/A	#N/A	#N/A	2.8135e-10
GS1-124K5.11	6.64848	2	0.0359998	0.152511	na	-0.190003	#N/A	#N/A	#N/A	#N/A	#N/A
ATP11A	4.39015	1	0.0361472	0.152828	3'UTR(M)	0.138231	#N/A	#N/A	#N/A	#N/A	4.0487e-06
SLC25A17	4.38971	1	0.0361564	0.152828	3'UTR(M)	-0.225394	#N/A	#N/A	#N/A	#N/A	2.7533e-05
CCDC93	4.37863	1	0.0363923	0.153486	3'UTR(M),3'UTR(L)	-0.458507	-0.017731	0.979371	0.993749	#N/A	6.7876e-08
WAC	4.37854	1	0.0363941	0.153486	3'UTR(F),3'UTR(M)	-0.155862	#N/A	#N/A	#N/A	1	1
SSBP2	4.37478	1	0.0364746	0.153653	3'UTR(F),3'UTR(M)	-0.217321	2.70978	0.368277	0.730133	#N/A	0.99777
ANTXR2	4.35272	1	0.0369498	0.155106	3'UTR(M)	-0.122011	-3.49423	0.277905	0.681722	#N/A	0.086921
MAMLD1	4.35132	1	0.0369803	0.155106	3'UTR(F),3'UTR(L)	-0.155261	#N/A	#N/A	#N/A	#N/A	0.62647
PCYT1A	6.59397	2	0.0369946	0.155106	3'UTR(F),3'UTR(M)	-0.0244968	0.39437	0.535458	0.826022	#N/A	2.024e-05
SIK2	6.59378	2	0.0369981	0.155106	3'UTR(M),3'UTR(L)	-0.0882092	#N/A	#N/A	#N/A	#N/A	0.99651
RFX3	6.59224	2	0.0370265	0.155106	3'UTR(F),3'UTR(M),3'UTR(L)	-0.208645	#N/A	#N/A	#N/A	#N/A	1
RALA	4.34157	1	0.0371927	0.155627	3'UTR(F),3'UTR(M)	-0.148003	0.556672	0.0517136	0.433366	#N/A	0.97289
GPATCH2L	6.57791	2	0.0372927	0.155872	3'UTR(M),3'UTR(L)	0.229374	#N/A	#N/A	#N/A	#N/A	0.0028216
ARIH2	4.33057	1	0.0374338	0.156164	3'UTR(F),3'UTR(L)	-0.220989	#N/A	#N/A	#N/A	#N/A	0.99374
SFXN1	4.33001	1	0.037446	0.156164	3'UTR(M)	-0.25876	1.09999	0.000215694	0.119638	#N/A	0.00097212
ERCC2	4.32132	1	0.0376378	0.156776	3'UTR(F),3'UTR(M),3'UTR(L)	-0.232773	-0.173782	0.914168	0.975247	1	7.0654e-20
AGO4	6.55599	2	0.0377038	0.156776	Intron,3'UTR(F)	0.0398439	#N/A	#N/A	#N/A	#N/A	0.9999
MTX3	4.31767	1	0.0377184	0.156776	3'UTR(M),3'UTR(L)	0.257542	0.418106	0.628218	0.877711	#N/A	0.00016475
CD55	6.54311	2	0.0379474	0.157551	3'UTR(F),3'UTR(M)	-0.590817	#N/A	#N/A	#N/A	#N/A	5.6753e-12
ACTR2	4.30417	1	0.038019	0.157551	3'UTR(M)	-0.0637685	0.343261	0.0695677	0.479095	#N/A	0.99896
HCFC2	6.53871	2	0.038031	0.157551	3'UTR(F),3'UTR(M)	0.20678	#N/A	#N/A	#N/A	#N/A	0.99989
DDX31	4.28912	1	0.038357	0.158726	Intron,3'UTR(M)	-0.165293	#N/A	#N/A	#N/A	#N/A	1.9816e-12
MARCH7	6.51045	2	0.0385721	0.159311	Intron,3'UTR(M)	0.021936	#N/A	#N/A	#N/A	#N/A	0.66162
CMTM6	4.27911	1	0.0385834	0.159311	3'UTR(M),3'UTR(L)	-0.106028	#N/A	#N/A	#N/A	#N/A	0.43302
FBXL3	4.27696	1	0.0386324	0.159337	3'UTR(M),3'UTR(L)	0.293664	#N/A	#N/A	#N/A	#N/A	0.9807
NHS	4.25724	1	0.0390834	0.16102	Intron,3'UTR(S)	-0.191368	#N/A	#N/A	#N/A	1	0.99999
GNB1	6.46883	2	0.0393831	0.161914	3'UTR(M),3'UTR(L)	-0.167621	0.552846	0.0533297	0.440165	#N/A	0.9992
ATG4A	4.2441	1	0.0393869	0.161914	3'UTR(F),3'UTR(L)	-0.398162	#N/A	#N/A	#N/A	#N/A	0.98953
CTIF	8.33796	3	0.0395198	0.162282	Intron,3'UTR(F),3'UTR(M),3'UTR(L)	0.248091	-0.385887	0.651338	0.889084	#N/A	0.99994
CPD	10.0471	4	0.0396415	0.162604	3'UTR(F),3'UTR(M)	-0.0378637	0.256655	0.756784	0.918958	#N/A	0.00074113
EHD4	4.22326	1	0.0398736	0.163377	3'UTR(M)	0.185297	-0.77494	0.225931	0.651789	#N/A	4.1903e-05
ACTR1A	4.21335	1	0.0401069	0.16409	3'UTR(F),3'UTR(M)	-0.168124	0.00011505	0.999442	0.999817	#N/A	0.96621
COQ4	4.21216	1	0.0401353	0.16409	Intron,3'UTR(S)	-0.241905	#N/A	#N/A	#N/A	#N/A	3.3961e-09
TMEM127	4.20561	1	0.0402905	0.164545	3'UTR(M)	0.146945	#N/A	#N/A	#N/A	#N/A	0.012865
LRRC8A	4.20156	1	0.0403869	0.164759	3'UTR(F),3'UTR(L)	-0.179239	#N/A	#N/A	#N/A	#N/A	0.94398
HSPA9	4.19849	1	0.04046	0.164878	3'UTR(M)	-0.0625712	0.185648	0.215931	0.641501	#N/A	0.96852
ST6GALNAC5	6.4082	2	0.0405954	0.16525	3'UTR(F),3'UTR(M),3'UTR(L)	0.0305825	#N/A	#N/A	#N/A	#N/A	0.16967
PARD3	8.26997	3	0.0407497	0.165591	Intron,3'UTR(F),3'UTR(L)	-0.0374941	0.466637	0.750104	0.917373	#N/A	0.95577
C8orf33	4.18565	1	0.0407676	0.165591	3'UTR(F),3'UTR(M)	-0.103766	#N/A	#N/A	#N/A	#N/A	2.0873e-09
PCDH1	4.18089	1	0.0408823	0.165877	Intron,3'UTR(L)	0.294169	#N/A	#N/A	#N/A	#N/A	0.99838
DCAF7	6.38885	2	0.0409901	0.166134	Intron	-0.0273504	1.29499	0.230795	0.655735	#N/A	0.93284
WDFY2	8.24392	3	0.0412306	0.166928	Intron,3'UTR(F),3'UTR(L)	0.034188	#N/A	#N/A	#N/A	#N/A	1.5198e-08
SCG3	4.16378	1	0.0412971	0.167017	3'UTR(F),3'UTR(M),3'UTR(L)	-0.139553	#N/A	#N/A	#N/A	#N/A	0.0014883
RMND5B	4.156	1	0.0414874	0.167414	3'UTR(M)	0.396648	#N/A	#N/A	#N/A	#N/A	1.9471e-13
WIPF1	4.15292	1	0.0415629	0.167414	3'UTR(F),3'UTR(L)	-0.356881	-0.068213	0.930064	0.97969	#N/A	0.90296
NKD1	4.15059	1	0.0416201	0.167414	3'UTR(F),3'UTR(M)	-0.611548	#N/A	#N/A	#N/A	#N/A	0.99344
MSRB3	6.35501	2	0.0416896	0.167414	3'UTR(F),3'UTR(M),3'UTR(L)	-0.064826	-1.79543	0.465651	0.789047	#N/A	0.003766
SRPRB	6.35026	2	0.0417887	0.167414	3'UTR(F),3'UTR(M)	-0.0731963	0.498293	0.109248	0.539966	#N/A	0.0058306
SGCB	6.35005	2	0.0417931	0.167414	3'UTR(M)	-0.256575	-0.959059	0.186783	0.618586	#N/A	9.5805e-07
GLUL	4.1401	1	0.0418786	0.167414	3'UTR(F),3'UTR(M)	-0.131539	-0.230438	0.677683	0.898099	#N/A	0.9957
CENPK	4.13971	1	0.0418882	0.167414	Intron,3'UTR(L)	0.561519	#N/A	#N/A	#N/A	#N/A	3.0771e-11
TMEM9	4.13957	1	0.0418919	0.167414	3'UTR(F),3'UTR(M),3'UTR(L)	-0.0523862	3.40504	0.0261927	0.362179	#N/A	0.0036291
TIMM22	4.13904	1	0.0419049	0.167414	3'UTR(F),3'UTR(M)	0.238879	-0.169864	0.803944	0.936963	#N/A	3.9658e-05
POLR3A	6.34316	2	0.0419372	0.167414	3'UTR(M)	0.2398	#N/A	#N/A	#N/A	1	1.2821e-23
NKIRAS2	4.13574	1	0.0419868	0.167414	3'UTR(F),3'UTR(L)	-0.217584	#N/A	#N/A	#N/A	#N/A	0.0067229
CNTNAP2	9.90782	4	0.0420093	0.167414	Intron,3'UTR(F),3'UTR(M),3'UTR(L)	-0.0658144	0.838217	0.444311	0.776919	1	2.8673e-09
DENR	4.13435	1	0.0420212	0.167414	3'UTR(F),3'UTR(M)	-0.185254	-0.427757	0.402744	0.751329	#N/A	0.87514
AZI2	6.33082	2	0.0421968	0.167889	3'UTR(M)	-0.0269771	#N/A	#N/A	#N/A	#N/A	0.0069113
ZNF256	4.12596	1	0.0422301	0.167889	3'UTR(M),3'UTR(L)	0.465093	#N/A	#N/A	#N/A	#N/A	0.0055297
UBN2	6.31541	2	0.0425231	0.168875	3'UTR(F),3'UTR(M),3'UTR(L)	-0.0919858	#N/A	#N/A	#N/A	#N/A	0.99993
SPCS3	4.09562	1	0.0429944	0.170566	3'UTR(F),3'UTR(M)	-0.119312	-0.0655134	0.808621	0.9372	#N/A	0.81991
NUDCD1	4.08039	1	0.0433836	0.171928	3'UTR(F),3'UTR(M)	-0.333039	-0.71632	0.477827	0.795901	#N/A	2.6721e-11
CCDC25	6.26768	2	0.0435503	0.172406	3'UTR(M),3'UTR(L)	-0.0740939	-4.59337	0.141459	0.571138	#N/A	0.0091245
TBC1D15	8.11068	3	0.0437789	0.173128	3'UTR(F),3'UTR(M),3'UTR(L)	-0.268429	0.729437	0.381605	0.737887	#N/A	0.06152
FAM118A	6.24207	2	0.0441114	0.174113	3'UTR(F),3'UTR(M)	0.0366689	#N/A	#N/A	#N/A	#N/A	6.3156e-05
GCSHP3	4.0509	1	0.0441478	0.174113	na	0.339141	#N/A	#N/A	#N/A	#N/A	#N/A
RPGRIP1L	6.23953	2	0.0441675	0.174113	Intron,3'UTR(F)	0.234653	#N/A	#N/A	#N/A	1	4.083e-31
SRSF3	6.22905	2	0.0443996	0.174844	3'UTR(F),3'UTR(M)	-0.00427881	-0.233753	0.285997	0.689045	#N/A	0.96323
EMC1	4.03359	1	0.0446029	0.17546	3'UTR(M)	-0.200568	0.908809	0.125319	0.559487	#N/A	6.7281e-26
MKL2	4.03021	1	0.0446924	0.175628	Intron	-0.267815	#N/A	#N/A	#N/A	#N/A	0.99999
WDR73	4.02604	1	0.044803	0.175878	3'UTR(F),3'UTR(M)	-0.569431	#N/A	#N/A	#N/A	#N/A	2.8229e-09
SC5D	6.20665	2	0.0448997	0.176073	3'UTR(F),3'UTR(M),3'UTR(L)	0.0474498	#N/A	#N/A	#N/A	#N/A	0.0025941
ACVR2A	6.20276	2	0.0449872	0.176231	3'UTR(F),3'UTR(M),3'UTR(L)	-0.294019	#N/A	#N/A	#N/A	#N/A	0.99972
RBM33	6.18957	2	0.0452848	0.177028	Intron,3'UTR(F),3'UTR(M),3'UTR(L)	-0.00469498	0.777358	0.551171	0.836286	#N/A	1
KIRREL	4.00698	1	0.0453124	0.177028	3'UTR(F),3'UTR(L)	-0.275951	#N/A	#N/A	#N/A	#N/A	0.99855
HNRNPLL	4.00595	1	0.0453398	0.177028	3'UTR(M)	-0.135224	0.11681	0.813511	0.937575	#N/A	0.91907
CGGBP1	6.18416	2	0.0454073	0.177028	3'UTR(F),3'UTR(M),3'UTR(L)	-0.224828	0.0223266	0.971979	0.992617	#N/A	0.81819
NPR3	4.00272	1	0.0454268	0.177028	Intron,3'UTR(F)	-0.462626	#N/A	#N/A	#N/A	#N/A	1.006e-05
TANGO2	3.99549	1	0.0456221	0.177604	3'UTR(F),3'UTR(L)	-0.333804	-4.77005	0.257738	0.672694	#N/A	0.00014769
AEBP2	6.17112	2	0.0457045	0.17774	3'UTR(M)	0.258786	#N/A	#N/A	#N/A	#N/A	0.99921
TOX4	6.16296	2	0.0458913	0.178082	3'UTR(M)	0.154503	#N/A	#N/A	#N/A	#N/A	0.95637
PRKD3	6.1628	2	0.0458949	0.178082	3'UTR(F),3'UTR(M),3'UTR(L)	-0.163848	#N/A	#N/A	#N/A	#N/A	0.0052882
SHANK1	6.16105	2	0.0459351	0.178082	Intron,3'UTR(S)	-0.474754	#N/A	#N/A	#N/A	#N/A	1
FNDC3B	3.97639	1	0.0461424	0.1787	3'UTR(F),3'UTR(M)	-0.124372	1.40168	0.0779699	0.490209	#N/A	1
SPPL3	6.14859	2	0.0462223	0.178825	3'UTR(M),3'UTR(L)	-0.152462	#N/A	#N/A	#N/A	#N/A	0.99656
DNALI1	3.96523	1	0.0464491	0.179517	3'UTR(F),3'UTR(L)	0.227199	#N/A	#N/A	#N/A	#N/A	4.1201e-11
WASL	3.95358	1	0.0467718	0.180331	3'UTR(M)	-0.139354	0.398538	0.420746	0.761928	#N/A	0.87654
PTGR1	3.95274	1	0.0467951	0.180331	Intron	0.176859	-0.521214	0.183019	0.616052	#N/A	3.5375e-08
JAZF1	3.95242	1	0.0468041	0.180331	3'UTR(F),3'UTR(L)	-0.270451	#N/A	#N/A	#N/A	#N/A	0.89582
EIF5	3.94669	1	0.0469636	0.180381	3'UTR(F),3'UTR(M)	-0.150714	-0.300477	0.309263	0.703986	#N/A	0.98758
SUGT1	3.94578	1	0.0469889	0.180381	3'UTR(F),3'UTR(M)	-0.249384	0.0779605	0.699708	0.905961	#N/A	0.45272
INPP4B	3.94516	1	0.0470065	0.180381	3'UTR(F),3'UTR(L)	-0.273106	-1.8281	0.121837	0.554611	#N/A	0.55218
NOP14-AS1	3.94387	1	0.0470424	0.180381	na	-0.148207	#N/A	#N/A	#N/A	#N/A	#N/A
WARS2	3.94064	1	0.0471329	0.180381	3'UTR(F),3'UTR(M)	0.252431	-0.998205	0.216325	0.641501	#N/A	0.050885
AKTIP	9.62979	4	0.0471476	0.180381	Intron,3'UTR(F),3'UTR(M)	0.0390691	#N/A	#N/A	#N/A	#N/A	0.40379
KIF5B	3.93987	1	0.0471544	0.180381	Intron,3'UTR(M)	-0.0853874	-0.0581451	0.765312	0.923034	#N/A	0.99427
FAF1	3.93362	1	0.0473299	0.180868	3'UTR(M),3'UTR(L)	-0.346728	-0.285593	0.765924	0.923117	#N/A	0.99895
EDEM1	3.92889	1	0.0474631	0.181097	3'UTR(F),3'UTR(M)	-0.129845	#N/A	#N/A	#N/A	#N/A	1.0594e-13
NTRK3	6.09462	2	0.0474866	0.181097	Intron	-0.181973	#N/A	#N/A	#N/A	#N/A	0.9983
GPBP1	3.92523	1	0.0475666	0.181218	3'UTR(F),3'UTR(M),3'UTR(L)	-0.127496	#N/A	#N/A	#N/A	#N/A	0.41644
SCUBE3	3.92206	1	0.0476564	0.181241	3'UTR(M)	-0.0937577	0.8084	0.167292	0.59618	#N/A	0.99939
GPM6A	6.08661	2	0.0476771	0.181241	3'UTR(F),3'UTR(L),5UTR	0.0930298	2.4185	0.012976	0.323029	#N/A	0.98962
ZDHHC2	6.0849	2	0.0477179	0.181241	3'UTR(F),3'UTR(M),3'UTR(L)	-0.261587	#N/A	#N/A	#N/A	#N/A	0.0010008
EID2B	3.91795	1	0.0477731	0.181267	3'UTR(F),3'UTR(M)	-0.664646	#N/A	#N/A	#N/A	#N/A	NA
CLDND1	3.91296	1	0.047915	0.181621	3'UTR(M)	-0.297109	#N/A	#N/A	#N/A	#N/A	0.16354
PTPRG	6.06923	2	0.0480931	0.182038	3'UTR(M),3'UTR(L)	-0.234653	#N/A	#N/A	#N/A	#N/A	5.0736e-06
KBTBD6	3.90572	1	0.0481221	0.182038	3'UTR(F),3'UTR(L)	-0.170786	#N/A	#N/A	#N/A	#N/A	0.97282
PRTG	3.90013	1	0.0482824	0.182239	3'UTR(M),3'UTR(L)	-0.196908	#N/A	#N/A	#N/A	#N/A	1.1959e-07
PSMA3-AS1	3.89983	1	0.0482909	0.182239	na	-0.291543	#N/A	#N/A	#N/A	#N/A	#N/A
TTK	3.89795	1	0.048345	0.182239	3'UTR(F),3'UTR(L)	0.314053	#N/A	#N/A	#N/A	#N/A	0.0012734
CEBPZOS	3.89697	1	0.0483733	0.182239	Intron	-0.303489	#N/A	#N/A	#N/A	#N/A	#N/A
TMEM237	3.8954	1	0.0484186	0.182239	3'UTR(M),3'UTR(L)	0.0994495	#N/A	#N/A	#N/A	1	1.8704e-12
CHD1	3.89306	1	0.048486	0.182309	3'UTR(M)	-0.367978	#N/A	#N/A	#N/A	#N/A	1
UBE2K	6.04109	2	0.0487746	0.183211	3'UTR(F),3'UTR(M),3'UTR(L)	-0.0554998	0.231208	0.378008	0.733883	#N/A	0.98621
GGCX	7.85079	3	0.0491982	0.184617	Intron,3'UTR(M)	-0.127355	1.90317	0.280201	0.683574	#N/A	2.0199e-14
FAM131B	3.85976	1	0.0494575	0.185283	3'UTR(M),3'UTR(L)	-0.127431	#N/A	#N/A	#N/A	#N/A	0.99092
RFC5	3.85918	1	0.0494746	0.185283	3'UTR(M)	0.137787	0.038867	0.956102	0.989716	#N/A	0.00050356
RBL1	3.8517	1	0.0496955	0.185924	3'UTR(M),3'UTR(L)	-0.784355	#N/A	#N/A	#N/A	#N/A	2.9339e-12
CD46	3.84789	1	0.0498085	0.186161	Intron,3'UTR(M)	0.144573	#N/A	#N/A	#N/A	#N/A	4.7013e-07
SGPL1	3.84605	1	0.0498634	0.18618	3'UTR(M),3'UTR(L)	-0.229359	0.809426	0.0344453	0.384313	#N/A	0.0036264
LINC00094	3.82508	1	0.0504908	0.188335	na	-0.24554	#N/A	#N/A	#N/A	#N/A	#N/A
SLC11A2	5.96932	2	0.0505567	0.188393	Intron,3'UTR(F)	-0.012321	#N/A	#N/A	#N/A	#N/A	0.0066528
CAND1	3.80105	1	0.0512206	0.19023	3'UTR(F),3'UTR(M)	-0.158221	0.0399753	0.810185	0.9372	#N/A	1
AKAP9	3.80007	1	0.0512505	0.19023	Intron,3'UTR(F),3'UTR(M)	-0.240871	-1.05194	0.267096	0.676623	#N/A	4.5249e-17
TRMT1L	5.94088	2	0.0512807	0.19023	3'UTR(F),3'UTR(M),3'UTR(L)	-0.262938	#N/A	#N/A	#N/A	#N/A	0.79653
C1orf123	3.79854	1	0.0512974	0.19023	Intron,3'UTR(M)	-0.10287	#N/A	#N/A	#N/A	#N/A	1.2226e-06
LOC100507291	3.7979	1	0.0513168	0.19023	na	-0.932603	#N/A	#N/A	#N/A	#N/A	#N/A
ANKS6	3.79667	1	0.0513546	0.19023	Intron,3'UTR(M)	-0.426227	#N/A	#N/A	#N/A	#N/A	6.9447e-06
TRAPPC3	3.79292	1	0.0514697	0.190417	3'UTR(F),3'UTR(L)	-0.069803	-0.305829	0.368194	0.730133	#N/A	0.25083
ACVR1B	3.79172	1	0.0515067	0.190417	3'UTR(F),3'UTR(M),3'UTR(L)	-0.18128	#N/A	#N/A	#N/A	#N/A	0.99969
AMDHD2	3.78888	1	0.051594	0.190552	Intron,3'UTR(F)	-0.250064	2.41025	0.196651	0.626874	#N/A	0.002313
BDNF	3.77897	1	0.0519006	0.191436	3'UTR(M),3'UTR(L)	0.0968165	2.07988	0.0177859	0.335807	#N/A	0.65626
SLC30A1	3.77784	1	0.0519357	0.191436	3'UTR(F),3'UTR(M),3'UTR(L)	0.162385	#N/A	#N/A	#N/A	#N/A	0.98532
TM2D3	3.76897	1	0.0522118	0.192265	Intron,3'UTR(F),3'UTR(M),3'UTR(L)	0.121142	#N/A	#N/A	#N/A	#N/A	7.9392e-09
PAPD5	3.76175	1	0.0524377	0.192907	3'UTR(F),3'UTR(M)	-0.242436	#N/A	#N/A	#N/A	#N/A	0.99943
GPATCH2	7.70593	3	0.0524968	0.192935	Intron,3'UTR(F),3'UTR(M),3'UTR(L)	0.158165	#N/A	#N/A	#N/A	#N/A	1.0165e-11
LIMD2	3.75008	1	0.0528049	0.193877	3'UTR(F),3'UTR(L)	0.0991109	-0.22255	0.746482	0.916767	#N/A	0.16402
XPA	3.74598	1	0.0529347	0.194163	3'UTR(F),3'UTR(M)	-0.391828	#N/A	#N/A	#N/A	1	7.8652e-05
RAD51C	3.7246	1	0.0536165	0.196431	Intron,3'UTR(F)	0.570357	#N/A	#N/A	#N/A	#N/A	6.1906e-14
KCTD15	5.84629	2	0.0537644	0.196431	Intron,3'UTR(M),3'UTR(L)	-0.046826	2.79155	0.264769	0.676485	#N/A	0.035511
DUSP8	3.71913	1	0.0537923	0.196431	3'UTR(F),3'UTR(M),3'UTR(L)	-0.212234	#N/A	#N/A	#N/A	#N/A	0.69975
TSPAN6	3.71905	1	0.053795	0.196431	3'UTR(F),3'UTR(M)	-0.183814	-0.522599	0.314632	0.709095	#N/A	0.066079
CRISPLD1	3.71821	1	0.0538222	0.196431	3'UTR(M)	0.058055	2.45874	0.0133554	0.32522	#N/A	1.8207e-09
GPR85	3.71679	1	0.0538678	0.196431	3'UTR(L),5UTR	-0.327286	#N/A	#N/A	#N/A	#N/A	0.77281
COG5	7.6403	3	0.0540611	0.196936	Intron,3'UTR(F),3'UTR(M)	-0.0981623	-0.889693	0.332524	0.719332	#N/A	9.7667e-20
PDCD6IP	3.70926	1	0.0541115	0.196936	3'UTR(F),3'UTR(M),3'UTR(L)	-0.101663	-0.167719	0.476021	0.794651	#N/A	0.70554
NACC2	3.70004	1	0.0544113	0.197835	3'UTR(M),3'UTR(L)	0.0982399	#N/A	#N/A	#N/A	#N/A	0.31484
FBRS	3.69421	1	0.0546016	0.198321	3'UTR(F),3'UTR(L)	-0.0732742	#N/A	#N/A	#N/A	#N/A	0.99987
PDK1	3.69271	1	0.0546509	0.198321	Intron	-0.155297	#N/A	#N/A	#N/A	#N/A	1.0963e-05
NXPE3	9.26917	4	0.0547126	0.198353	Intron,3'UTR(F),3'UTR(M),3'UTR(L)	0.264402	#N/A	#N/A	#N/A	#N/A	0.013439
PGAP1	5.80751	2	0.0548171	0.19854	3'UTR(M),3'UTR(L)	0.174579	0.879432	0.162799	0.593668	1	3.1628e-08
EGFR	5.80547	2	0.0548729	0.19855	3'UTR(F),3'UTR(M),3'UTR(L)	0.0474154	0.436578	0.548884	0.835055	#N/A	0.36837
PHF3	3.68083	1	0.0550415	0.198968	3'UTR(F),3'UTR(M)	-0.165099	#N/A	#N/A	#N/A	#N/A	0.99256
SEH1L	3.67728	1	0.0551586	0.199199	Intron,3'UTR(F)	-0.409985	0.298053	0.658902	0.892984	#N/A	0.14936
SIRPA	3.67123	1	0.0553593	0.199731	3'UTR(F),3'UTR(M)	-0.307122	1.33971	0.547703	0.8346	#N/A	0.67197
ZNF626	3.65873	1	0.0557762	0.201041	Intron	-0.234978	#N/A	#N/A	#N/A	#N/A	0.40889
OIP5-AS1	5.77087	2	0.0558306	0.201044	na	-0.0734047	#N/A	#N/A	#N/A	#N/A	#N/A
ZNF320	5.75475	2	0.0562823	0.202476	Intron	0.260988	#N/A	#N/A	#N/A	#N/A	0.2186
SBF1	5.75198	2	0.0563603	0.202494	3'UTR(F),3'UTR(M),3'UTR(L)	0.0281576	1.05452	0.2654	0.676485	#N/A	0.99933
HNRNPA2B1	3.64034	1	0.0563956	0.202494	3'UTR(M)	-0.0489289	0.0321666	0.888977	0.965783	#N/A	0.99732
WRN	5.74114	2	0.0566666	0.203272	3'UTR(F),3'UTR(M)	-0.247841	#N/A	#N/A	#N/A	#N/A	2.6432e-34
KIF2A	7.52467	3	0.056928	0.204015	3'UTR(M),3'UTR(L)	0.0408516	0.265538	0.448934	0.78032	#N/A	0.99998
GFM1	3.6197	1	0.0570993	0.204433	3'UTR(F),3'UTR(M)	-0.112075	0.0377203	0.973606	0.992617	#N/A	9.278e-13
DOCK5	5.71685	2	0.0573589	0.205166	3'UTR(M),3'UTR(L)	-0.0636369	-0.494526	0.813617	0.937575	#N/A	2.8994e-09
SSX2IP	9.13414	4	0.0578327	0.206664	3'UTR(F),3'UTR(M)	-0.221873	#N/A	#N/A	#N/A	#N/A	2.307e-09
SLC29A4	3.59454	1	0.0579697	0.206956	3'UTR(F),3'UTR(L)	-0.222343	#N/A	#N/A	#N/A	#N/A	1.1358e-05
YTHDC1	3.59216	1	0.0580527	0.207055	3'UTR(F),3'UTR(M)	-0.0944358	1.28003	0.493164	0.804994	#N/A	1
SH3BGRL2	3.5865	1	0.0582507	0.207563	3'UTR(M)	0.213537	#N/A	#N/A	#N/A	#N/A	1.5983e-07
PQLC3	3.58215	1	0.0584034	0.207909	3'UTR(F),3'UTR(L)	-0.379703	#N/A	#N/A	#N/A	#N/A	4.4278e-10
PHKA2	3.57837	1	0.0585365	0.208185	3'UTR(M)	-0.473959	-0.815125	0.748823	0.916881	#N/A	0.3839
MICALL1	3.57199	1	0.0587618	0.208788	3'UTR(M),3'UTR(L)	-0.160086	#N/A	#N/A	#N/A	#N/A	1.1968e-07
ANKIB1	5.66484	2	0.0588701	0.208975	3'UTR(M),3'UTR(L)	0.173159	-2.73083	0.141322	0.571138	#N/A	0.99996
PRKAG2	3.56035	1	0.0591752	0.209859	3'UTR(F),3'UTR(M)	-0.196798	#N/A	#N/A	#N/A	#N/A	0.99692
FBLN1	3.55573	1	0.0593403	0.210103	Intron,3'UTR(M)	-0.112986	-0.217663	0.497384	0.807724	#N/A	0.91878
IL17RD	3.55528	1	0.0593562	0.210103	3'UTR(M),3'UTR(L)	-0.0817057	#N/A	#N/A	#N/A	#N/A	1.053e-06
STK17B	5.64454	2	0.0594708	0.21031	3'UTR(F),3'UTR(M),3'UTR(L)	-0.0379127	#N/A	#N/A	#N/A	#N/A	0.013619
CLN5	5.63485	2	0.0597597	0.211132	3'UTR(F),CDS,3'UTR(M)	-0.153681	0.805987	0.0598431	0.458889	1	1.7111e-08
ZNF644	5.62077	2	0.0601817	0.212423	Intron,3'UTR(L)	-0.364596	#N/A	#N/A	#N/A	#N/A	0.99914
BAALC	3.52629	1	0.0604028	0.213002	3'UTR(F),3'UTR(L)	-0.256911	#N/A	#N/A	#N/A	#N/A	0.0044356
DSCR3	5.60385	2	0.0606931	0.213798	Intron,3'UTR(M),3'UTR(L)	-0.350866	#N/A	#N/A	#N/A	#N/A	0.00014872
TSN	5.60138	2	0.0607683	0.213798	3'UTR(F),3'UTR(M)	-0.111185	-0.169593	0.489809	0.803359	#N/A	0.78659
CTDSP1	3.51543	1	0.0607997	0.213798	Intron,3'UTR(L)	0.118337	#N/A	#N/A	#N/A	#N/A	0.99254
SPTSSA	3.5032	1	0.0612503	0.21518	3'UTR(M)	-0.0826149	#N/A	#N/A	#N/A	#N/A	0.64582
LINC00641	3.49822	1	0.0614347	0.215626	na	-0.19719	#N/A	#N/A	#N/A	#N/A	#N/A
LLPH	3.48933	1	0.0617654	0.216461	3'UTR(M)	-0.157621	#N/A	#N/A	#N/A	#N/A	0.34929
SUB1	5.56809	2	0.0617881	0.216461	3'UTR(F),3'UTR(M),3'UTR(L)	-0.110303	0.236394	0.164338	0.593668	#N/A	0.89245
AP1S2	3.48654	1	0.0618698	0.216544	3'UTR(F),3'UTR(M),3'UTR(L)	-0.190859	0.530733	0.350804	0.727179	1	0.86702
MTA3	3.48402	1	0.0619641	0.21658	Intron,3'UTR(F),3'UTR(M)	0.121922	-0.110706	0.956321	0.989716	#N/A	0.03435
PNISR	3.48174	1	0.0620494	0.21658	3'UTR(M)	-0.424312	-0.886772	0.606294	0.867973	#N/A	0.99998
KIAA1324L	3.48163	1	0.0620536	0.21658	3'UTR(M)	0.316191	#N/A	#N/A	#N/A	#N/A	2.036e-05
TBC1D20	3.47983	1	0.0621211	0.216614	Intron,3'UTR(S)	-0.276051	#N/A	#N/A	#N/A	#N/A	0.93074
DYRK3	5.54816	2	0.062407	0.217409	3'UTR(F),3'UTR(M),3'UTR(L)	0.292474	#N/A	#N/A	#N/A	#N/A	3.5842e-06
ATF6	3.46867	1	0.0625415	0.217675	3'UTR(F),3'UTR(L)	-0.126142	#N/A	#N/A	#N/A	#N/A	3.2333e-07
PRRC2C	3.46463	1	0.0626944	0.218004	Intron,3'UTR(M),3'UTR(L)	0.108339	-0.260251	0.698776	0.905961	#N/A	1
YAP1	5.53321	2	0.062875	0.218429	3'UTR(F),3'UTR(M)	-0.150008	-0.0189148	0.96074	0.98972	1	0.99918
C6orf106	3.45824	1	0.0629371	0.218443	3'UTR(M),3'UTR(L)	-0.104112	#N/A	#N/A	#N/A	#N/A	0.85127
AVL9	3.45264	1	0.0631509	0.218783	3'UTR(F),3'UTR(M),3'UTR(L)	-0.167068	2.33883	0.0954593	0.526398	#N/A	0.0026324
ZNF554	5.52442	2	0.0631519	0.218783	Intron,3'UTR(M),3'UTR(L)	-0.0507977	#N/A	#N/A	#N/A	#N/A	3.7213e-10
CTBP2	3.44995	1	0.0632538	0.218792	3'UTR(M)	-0.134484	0.190489	0.592712	0.859472	#N/A	0.0013557
SATB1	3.44571	1	0.0634163	0.218792	3'UTR(F),3'UTR(M)	-0.296302	#N/A	#N/A	#N/A	#N/A	0.99051
TUBGCP3	3.44529	1	0.0634321	0.218792	Intron,3'UTR(S)	0.286162	0.717563	0.591024	0.85917	#N/A	0.4552
KCNQ2	5.5151	2	0.0634469	0.218792	Intron,3'UTR(S)	-0.135277	#N/A	#N/A	#N/A	1	0.99998
NOC3L	3.44375	1	0.0634914	0.218792	3'UTR(F),3'UTR(M),3'UTR(L)	0.265469	0.91263	0.124778	0.558663	#N/A	2.8342e-14
NOG	3.44339	1	0.0635053	0.218792	3'UTR(F),3'UTR(L)	-0.168423	#N/A	#N/A	#N/A	#N/A	0.89026
RCAN2	3.44063	1	0.0636114	0.218812	3'UTR(M),3'UTR(L)	-0.211167	#N/A	#N/A	#N/A	#N/A	0.83475
ERLIN2	3.43913	1	0.0636691	0.218812	3'UTR(M)	0.216341	0.228514	0.176472	0.608933	1	0.00066662
KBTBD2	3.43868	1	0.0636864	0.218812	3'UTR(M)	-0.221255	#N/A	#N/A	#N/A	#N/A	0.99795
LAMC2	3.42625	1	0.0641676	0.220128	3'UTR(F),3'UTR(M)	-0.189016	0.66857	0.564701	0.844518	#N/A	2.8791e-12
SLFN5	7.25544	3	0.0641868	0.220128	Intron,3'UTR(M),3'UTR(L)	-0.142714	-0.300219	0.740661	0.91571	#N/A	1.7046e-12
NETO2	3.42107	1	0.0643691	0.220215	3'UTR(F),3'UTR(M)	-0.442842	#N/A	#N/A	#N/A	#N/A	0.062704
SAR1B	3.4205	1	0.0643917	0.220215	3'UTR(M),3'UTR(L)	-0.219172	0.272668	0.372117	0.730784	#N/A	0.002315
SPOCK2	3.41817	1	0.0644824	0.220215	3'UTR(F),3'UTR(L)	-0.285505	#N/A	#N/A	#N/A	#N/A	0.24144
RIC8B	3.41701	1	0.0645279	0.220215	3'UTR(F),3'UTR(L)	-0.514404	#N/A	#N/A	#N/A	#N/A	0.99892
MMP16	3.4167	1	0.0645398	0.220215	3'UTR(M),3'UTR(L)	-0.243566	#N/A	#N/A	#N/A	#N/A	0.91797
FGD5-AS1	3.4149	1	0.0646105	0.220215	na	-0.0547546	#N/A	#N/A	#N/A	#N/A	#N/A
MAP2K4	5.47835	2	0.0646237	0.220215	Intron,3'UTR(F),3'UTR(M)	0.203261	-0.203369	0.664423	0.894019	#N/A	0.99709
AFDN	5.47629	2	0.0646904	0.220241	Intron,3'UTR(M)	-0.145498	1.23435	0.149963	0.580946	#N/A	#N/A
DHX8	5.47299	2	0.0647971	0.220404	Intron,3'UTR(F)	-0.332714	#N/A	#N/A	#N/A	#N/A	9.1546e-07
NR6A1	5.46893	2	0.0649286	0.220651	Intron,3'UTR(L)	0.689982	#N/A	#N/A	#N/A	#N/A	0.98169
KIAA1841	3.39754	1	0.0652937	0.221491	Intron	0.812165	#N/A	#N/A	#N/A	#N/A	7.5851e-09
RNF152	5.45771	2	0.0652941	0.221491	Intron,3'UTR(M),3'UTR(L)	0.148668	#N/A	#N/A	#N/A	#N/A	0.12894
IFNAR1	5.44107	2	0.0658394	0.223139	3'UTR(F),3'UTR(M)	-0.127484	#N/A	#N/A	#N/A	#N/A	3.2501e-12
GPBP1L1	3.3746	1	0.0662085	0.224096	3'UTR(F),3'UTR(M),3'UTR(L)	-0.300533	#N/A	#N/A	#N/A	#N/A	0.19902
SREBF2	3.37378	1	0.0662415	0.224096	3'UTR(F),3'UTR(L)	-0.170579	#N/A	#N/A	#N/A	#N/A	0.20734
ACSL3	5.41134	2	0.0668254	0.225868	3'UTR(F),3'UTR(M),3'UTR(L)	0.076861	0.504908	0.121499	0.554611	#N/A	0.00034758
CCNA2	3.35516	1	0.0669948	0.226236	3'UTR(M)	-0.181992	#N/A	#N/A	#N/A	#N/A	0.99962
KMT2E	3.35213	1	0.0671183	0.226412	Intron,3'UTR(F),3'UTR(M)	-0.0830756	#N/A	#N/A	#N/A	#N/A	1
EML4	3.35091	1	0.0671679	0.226412	3'UTR(F),3'UTR(L)	-0.091196	-0.411282	0.0408732	0.406599	#N/A	0.00048242
SDAD1	5.39486	2	0.0673785	0.226918	3'UTR(M),3'UTR(L)	-0.206609	-1.78431	0.330757	0.718823	#N/A	1.8319e-20
DPYD	3.3401	1	0.0676105	0.227487	Intron,3'UTR(S)	-0.232484	-2.45419	0.133608	0.565112	1	3.3686e-22
PURB	3.33752	1	0.0677167	0.227487	3'UTR(F),3'UTR(L)	-0.319459	-0.130636	0.838096	0.945709	#N/A	0.62543
XPO1	5.38351	2	0.067762	0.227487	Intron,3'UTR(F),3'UTR(M),3'UTR(L)	-0.11674	-0.444481	0.134458	0.565384	#N/A	1
ZBTB25	5.38267	2	0.0677904	0.227487	Intron,3'UTR(F),3'UTR(M)	0.107894	#N/A	#N/A	#N/A	#N/A	2.1949e-06
GNAO1	3.3339	1	0.0678659	0.227536	Intron,3'UTR(S)	0.130986	1.11942	0.00577593	0.285325	1	0.98963
DDHD1	3.32675	1	0.0681615	0.227948	3'UTR(M)	-0.0481107	#N/A	#N/A	#N/A	#N/A	0.902
COG3	3.32547	1	0.0682146	0.227948	3'UTR(F),3'UTR(L)	-0.166201	-1.28926	0.261361	0.674967	#N/A	0.99993
TET2	3.32543	1	0.0682163	0.227948	Intron,3'UTR(L)	-0.170104	#N/A	#N/A	#N/A	#N/A	4.3334e-54
DDX6	3.32505	1	0.0682321	0.227948	3'UTR(F),3'UTR(L)	-0.0597516	0.0128721	0.972596	0.992617	#N/A	0.99964
DYM	5.36766	2	0.0683012	0.227975	3'UTR(F),3'UTR(M)	-0.119086	#N/A	#N/A	#N/A	1	3.5939e-13
DYNLL2	3.32141	1	0.0683832	0.228046	3'UTR(F),3'UTR(M)	-0.109389	3.49063	0.208794	0.635936	#N/A	0.74311
PBDC1	3.31197	1	0.0687768	0.228996	3'UTR(F),3'UTR(M)	-0.123178	0.197421	0.467944	0.790495	#N/A	0.57162
TMEM260	3.31139	1	0.0688013	0.228996	3'UTR(F),3'UTR(M)	-0.583796	#N/A	#N/A	#N/A	#N/A	4.7299e-19
SYPL1	3.31019	1	0.0688517	0.228996	3'UTR(M)	-0.171573	1.87425	0.0701027	0.481365	#N/A	0.046723
MED17	3.30755	1	0.0689624	0.229161	3'UTR(F),3'UTR(M),3'UTR(L)	-0.0748216	#N/A	#N/A	#N/A	1	3.0751e-09
UBA5	8.69631	4	0.0691551	0.229597	3'UTR(M)	0.174098	-0.290372	0.56387	0.844278	#N/A	0.00025218
NPC1	3.30096	1	0.0692392	0.229673	Intron,3'UTR(M)	-0.182086	0.586001	0.420862	0.761928	#N/A	6.5418e-06
SNU13	3.29895	1	0.0693241	0.229751	3'UTR(F),3'UTR(L)	-0.0289456	-0.0479046	0.80425	0.936963	#N/A	#N/A
PXYLP1	3.28948	1	0.0697249	0.230875	3'UTR(F),3'UTR(L)	-0.0827871	#N/A	#N/A	#N/A	#N/A	#N/A
REV1	3.27603	1	0.0702986	0.232569	3'UTR(F),3'UTR(L)	0.066404	0.923605	0.38959	0.742858	#N/A	0.99989
IDH2	3.27427	1	0.070374	0.232613	3'UTR(F),3'UTR(L)	-0.0756353	-0.0520129	0.771773	0.927019	#N/A	0.88271
SLC35C1	3.27041	1	0.0705399	0.232956	3'UTR(F),3'UTR(M),3'UTR(L)	-0.218173	#N/A	#N/A	#N/A	1	0.023545
NDC1	3.26878	1	0.0706101	0.232982	3'UTR(F),3'UTR(L)	-0.220659	2.22894	0.162931	0.593668	#N/A	0.99932
TMEM128	3.26705	1	0.0706845	0.233022	3'UTR(F),3'UTR(M),3'UTR(L)	-0.0814054	#N/A	#N/A	#N/A	#N/A	0.00019994
SPEF2	3.25098	1	0.071381	0.235111	Intron	-0.447314	#N/A	#N/A	#N/A	#N/A	3.1152e-25
CCNL2	3.24494	1	0.0716443	0.235589	Intron,3'UTR(M)	-0.153563	#N/A	#N/A	#N/A	#N/A	0.16094
FGFR2	3.24346	1	0.071709	0.235589	3'UTR(M),3'UTR(L)	-0.0360175	#N/A	#N/A	#N/A	1	0.99731
VSTM4	3.24333	1	0.0717147	0.235589	3'UTR(M),3'UTR(L)	-0.0985592	#N/A	#N/A	#N/A	#N/A	0.033816
MME	3.24	1	0.0718607	0.235862	3'UTR(M)	-0.200183	-2.51442	0.040827	0.406599	#N/A	1.465e-18
ELAVL1	5.26321	2	0.0719627	0.23599	3'UTR(M)	-0.0559823	0.219572	0.395421	0.745439	#N/A	0.98849
ABHD12	3.23253	1	0.072189	0.236525	Intron,3'UTR(S)	0.175003	1.6459	0.0743811	0.484009	#N/A	1.9476e-05
UBALD2	3.22725	1	0.0724223	0.236954	3'UTR(F),3'UTR(M),3'UTR(L)	0.181842	#N/A	#N/A	#N/A	#N/A	0.3682
UGGT1	5.24872	2	0.072486	0.236954	3'UTR(F),3'UTR(M)	-0.0928269	0.0310049	0.894022	0.967886	#N/A	5.1934e-10
TMEM87A	3.22527	1	0.0725097	0.236954	3'UTR(M),3'UTR(L)	-0.123438	-0.90928	0.726039	0.909279	#N/A	0.081488
ZNF605	3.22337	1	0.0725939	0.237022	Intron,3'UTR(M)	-0.281343	#N/A	#N/A	#N/A	#N/A	0.40086
PID1	3.22075	1	0.0727101	0.237194	Intron,3'UTR(L)	-0.195716	#N/A	#N/A	#N/A	#N/A	0.003148
CHD7	3.21832	1	0.0728185	0.237341	Intron,3'UTR(M)	0.48762	#N/A	#N/A	#N/A	1	1
TAOK2	3.21343	1	0.0730362	0.237844	Intron,3'UTR(S)	0.211962	2.75717	0.177559	0.610452	#N/A	0.99976
NAPG	5.23072	2	0.0731414	0.23798	3'UTR(F),3'UTR(M)	-0.197059	1.83565	0.00141964	0.208437	#N/A	0.081162
PHC1	3.20597	1	0.07337	0.238516	3'UTR(F),3'UTR(M)	0.142302	#N/A	#N/A	#N/A	#N/A	0.99938
CLPX	3.20238	1	0.0735311	0.238832	3'UTR(M),3'UTR(L)	-0.239286	0.36356	0.603605	0.866359	#N/A	0.92377
GUCY1A2	6.94354	3	0.0737193	0.239047	Intron,3'UTR(F),3'UTR(M),3'UTR(L)	-0.246785	#N/A	#N/A	#N/A	#N/A	0.31409
GNL3L	6.94337	3	0.0737247	0.239047	3'UTR(F),3'UTR(M),3'UTR(L)	-0.0125662	#N/A	#N/A	#N/A	#N/A	0.99558
SMURF1	3.19326	1	0.0739423	0.239545	3'UTR(F),3'UTR(L)	-0.244475	#N/A	#N/A	#N/A	#N/A	0.6118
NOLC1	5.20327	2	0.0741521	0.240017	3'UTR(F),3'UTR(M),3'UTR(L)	-0.00755415	0.121709	0.829986	0.941443	#N/A	0.00010396
KHDRBS3	3.17878	1	0.0746003	0.240958	3'UTR(F),3'UTR(M),3'UTR(L)	-0.14992	4.59907	0.0727362	0.484009	#N/A	0.44237
HSPA4	3.17772	1	0.0746489	0.240958	3'UTR(F),3'UTR(L)	-0.135936	0.0498403	0.838197	0.945709	#N/A	0.99954
CCDC50	8.50675	4	0.0746829	0.240958	3'UTR(F),3'UTR(M),3'UTR(L)	-0.15937	0.914276	0.189075	0.620871	#N/A	3.9152e-07
ZMYM1	3.1766	1	0.0747001	0.240958	3'UTR(M),3'UTR(L)	-0.236654	#N/A	#N/A	#N/A	#N/A	1.317e-08
FAM126A	5.18643	2	0.0747793	0.241006	3'UTR(F),3'UTR(M)	-0.141948	#N/A	#N/A	#N/A	1	0.12103
TFIP11	3.16559	1	0.0752055	0.242171	3'UTR(F),3'UTR(L)	-0.237626	#N/A	#N/A	#N/A	#N/A	1.6636e-12
TMEM161B-AS1	3.15713	1	0.0755961	0.243219	na	-0.434487	#N/A	#N/A	#N/A	#N/A	#N/A
GNAQ	6.8804	3	0.0758092	0.243696	3'UTR(F),3'UTR(M),3'UTR(L)	-0.161168	0.37164	0.139676	0.568994	#N/A	0.98069
TGOLN2	3.15111	1	0.0758753	0.243699	3'UTR(F),3'UTR(M)	0.150993	#N/A	#N/A	#N/A	#N/A	0.0028483
LINC00938	3.14447	1	0.0761847	0.244483	na	0.145304	#N/A	#N/A	#N/A	#N/A	#N/A
DHX32	3.13677	1	0.0765453	0.245395	Intron,3'UTR(L)	-0.144989	#N/A	#N/A	#N/A	#N/A	1.6487e-09
USP10	3.13498	1	0.0766293	0.245395	Intron,3'UTR(F)	-0.127102	0.898553	0.236398	0.660749	#N/A	0.99411
PGK1	3.13421	1	0.0766656	0.245395	3'UTR(F),3'UTR(M)	-0.0546458	0.0224634	0.934549	0.981542	1	0.76537
PMS2P1	3.13063	1	0.0768338	0.245561	na	-0.282213	#N/A	#N/A	#N/A	#N/A	#N/A
AGAP3	3.13032	1	0.0768486	0.245561	Intron,3'UTR(F),3'UTR(M)	-0.092291	0.673694	0.213635	0.641501	#N/A	0.91091
BFAR	5.1269	2	0.0770384	0.245781	Intron,3'UTR(M)	0.0433117	#N/A	#N/A	#N/A	#N/A	1.5442e-08
STXBP1	3.12507	1	0.0770966	0.245781	3'UTR(F),3'UTR(M)	-0.338701	1.2066	0.00728646	0.303553	1	1
CDCA2	3.12469	1	0.0771143	0.245781	3'UTR(F),3'UTR(M)	-0.440037	#N/A	#N/A	#N/A	#N/A	1.5175e-11
C15orf40	5.10978	2	0.0777008	0.24744	Intron,3'UTR(F)	0.0433818	#N/A	#N/A	#N/A	#N/A	0.18627
PPP3CB	3.10851	1	0.0778843	0.247814	Intron,3'UTR(L)	-0.128446	0.279652	0.509271	0.814573	#N/A	0.99998
GFPT1	6.81005	3	0.078205	0.248623	3'UTR(F),3'UTR(M)	-0.0434099	-0.0741051	0.792501	0.932967	#N/A	0.89953
URB2	5.09343	2	0.0783386	0.248829	3'UTR(F),3'UTR(M)	0.0692999	#N/A	#N/A	#N/A	#N/A	1.2188e-17
CNTN2	3.09771	1	0.0784027	0.248829	3'UTR(F),3'UTR(L)	-0.543619	#N/A	#N/A	#N/A	#N/A	0.0021095
DPH3	3.09489	1	0.0785386	0.249049	3'UTR(M)	-0.330783	#N/A	#N/A	#N/A	#N/A	0.066294
PML	5.07909	2	0.0789022	0.24999	Intron,3'UTR(S)	0.0541594	0.229842	0.385891	0.740057	#N/A	0.21291
CWF19L1	3.08486	1	0.0790243	0.250166	Intron,3'UTR(L)	-0.143202	#N/A	#N/A	#N/A	#N/A	1.4404e-15
PANX1	5.07103	2	0.0792211	0.250421	3'UTR(F),3'UTR(M),3'UTR(L)	-0.221577	#N/A	#N/A	#N/A	#N/A	2.4684e-06
AZIN1	5.06952	2	0.0792805	0.250421	3'UTR(M)	-0.169903	#N/A	#N/A	#N/A	#N/A	0.99485
GTSE1	3.07907	1	0.0793058	0.250421	3'UTR(F),3'UTR(M)	-0.0843984	#N/A	#N/A	#N/A	#N/A	2.7012e-05
EYA3	3.07684	1	0.0794146	0.250421	Intron,3'UTR(L)	-0.174907	#N/A	#N/A	#N/A	#N/A	0.99702
FMNL3	3.07634	1	0.0794391	0.250421	3'UTR(F),3'UTR(M)	-0.104769	0.662417	0.547703	0.8346	#N/A	0.46549
ADCY9	3.0733	1	0.0795879	0.250679	3'UTR(M),3'UTR(L)	0.183605	#N/A	#N/A	#N/A	#N/A	0.97943
KRBOX4	5.05572	2	0.0798297	0.251229	3'UTR(F),3'UTR(M)	0.101821	#N/A	#N/A	#N/A	1	0.64798
RAB3GAP1	5.05152	2	0.0799975	0.251441	3'UTR(F),3'UTR(M)	-0.265404	0.745727	0.199092	0.629777	1	1.4523e-07
ALKBH4	3.06426	1	0.0800314	0.251441	3'UTR(F),3'UTR(M),3'UTR(L)	0.127043	#N/A	#N/A	#N/A	#N/A	0.12598
WDSUB1	3.05419	1	0.0805291	0.252636	Intron,3'UTR(S)	0.454117	#N/A	#N/A	#N/A	#N/A	6.7458e-14
RNGTT	5.03784	2	0.0805466	0.252636	3'UTR(F),3'UTR(M),3'UTR(L)	-0.0795686	#N/A	#N/A	#N/A	#N/A	0.37382
HDAC9	3.05068	1	0.0807033	0.252916	Intron,3'UTR(L)	0.370523	#N/A	#N/A	#N/A	#N/A	0.99973
HDAC4	3.04776	1	0.0808488	0.253159	3'UTR(M),3'UTR(L)	-0.153531	1.56939	0.39541	0.745439	1	1
TTLL12	3.04148	1	0.0811618	0.253927	3'UTR(M),3'UTR(L)	-0.0352821	0.448105	0.27541	0.68028	#N/A	2.2425e-15
RPP30	3.03973	1	0.0812496	0.25399	Intron	-0.296788	-0.270894	0.818727	0.939302	#N/A	5.3582e-08
NPEPPS	5.01811	2	0.0813451	0.254076	3'UTR(F),3'UTR(M),3'UTR(L)	-0.0284227	-0.31014	0.0852569	0.505417	#N/A	1
NCBP1	3.03478	1	0.0814976	0.254341	3'UTR(M)	-0.121887	-0.0567281	0.84545	0.947725	#N/A	1
PLEKHG4B	3.02927	1	0.0817746	0.254841	Intron,3'UTR(M)	-0.486578	#N/A	#N/A	#N/A	#N/A	1.0827e-32
FTX	3.02889	1	0.081794	0.254841	na	0.159441	#N/A	#N/A	#N/A	#N/A	#N/A
TSPAN14	5.00413	2	0.0819156	0.255007	3'UTR(M),3'UTR(L)	-0.0161848	-2.96043	0.352374	0.727179	#N/A	0.97908
CCNI	3.02479	1	0.0820011	0.255061	3'UTR(M),3'UTR(L)	-0.0652268	#N/A	#N/A	#N/A	#N/A	0.82718
TAPT1	3.02176	1	0.0821541	0.255132	3'UTR(F),3'UTR(M)	-0.320924	#N/A	#N/A	#N/A	#N/A	0.032078
NECTIN1	3.02058	1	0.0822143	0.255132	Intron	-0.120821	#N/A	#N/A	#N/A	#N/A	#N/A
PCGF2	3.02031	1	0.082228	0.255132	3'UTR(M),3'UTR(L)	-0.145738	#N/A	#N/A	#N/A	1	0.86397
MFSD10	3.01659	1	0.0824166	0.255505	3'UTR(F),3'UTR(L)	0.130108	#N/A	#N/A	#N/A	#N/A	7.3331e-11
TVP23A	3.01516	1	0.0824895	0.25552	Intron	-0.334334	#N/A	#N/A	#N/A	#N/A	1.6882e-07
HNRNPH3	3.0118	1	0.0826604	0.255744	3'UTR(F),3'UTR(M)	-0.113931	0.107513	0.721152	0.907959	#N/A	0.99221
N4BP2L2	4.9851	2	0.0826986	0.255744	Intron	-0.141973	#N/A	#N/A	#N/A	#N/A	1.3341e-09
MIER1	4.97475	2	0.0831278	0.256859	3'UTR(F),3'UTR(M)	-0.100184	#N/A	#N/A	#N/A	#N/A	0.28881
MYOF	2.99948	1	0.0832913	0.257152	Intron,3'UTR(L)	-0.0665511	0.0694613	0.822124	0.939827	#N/A	1.475e-54
HAUS2	4.96838	2	0.0833932	0.257255	3'UTR(F),3'UTR(M),3'UTR(L)	0.0707281	#N/A	#N/A	#N/A	#N/A	3.3829e-06
MRE11	2.99399	1	0.0835742	0.257543	3'UTR(F),3'UTR(M)	-0.273492	-0.00143668	0.997833	0.999234	#N/A	#N/A
HDHD2	2.99302	1	0.0836241	0.257543	3'UTR(M)	-0.21171	-0.634624	0.167894	0.596956	#N/A	3.8702e-06
GLRX3	4.9435	2	0.0844369	0.259725	Intron,3'UTR(F),3'UTR(M)	0.085592	0.114881	0.513894	0.817838	#N/A	0.35753
GNAZ	4.94205	2	0.0844981	0.259725	Intron,3'UTR(F),3'UTR(M),3'UTR(L)	0.0439751	2.77381	0.0385497	0.399089	#N/A	0.96272
ZNF514	2.97537	1	0.0845408	0.259725	3'UTR(M),3'UTR(L)	0.712656	#N/A	#N/A	#N/A	#N/A	1.035e-10
TBC1D22A	2.96986	1	0.0848289	0.260397	3'UTR(F),3'UTR(L)	-0.35883	#N/A	#N/A	#N/A	#N/A	0.41937
PLRG1	2.96432	1	0.0851204	0.260931	3'UTR(F),3'UTR(M)	0.0895087	0.780968	0.574033	0.848411	#N/A	0.99911
DZIP3	2.9639	1	0.0851423	0.260931	3'UTR(F),3'UTR(L)	0.0585824	#N/A	#N/A	#N/A	#N/A	1.6537e-13
GNB5	2.95711	1	0.0855006	0.261815	3'UTR(M)	-0.115719	#N/A	#N/A	#N/A	#N/A	6.3614e-08
SRSF10	4.91602	2	0.0856051	0.261921	Intron,3'UTR(M)	-0.153013	-0.170122	0.482559	0.797967	#N/A	0.42275
PSMD11	2.95342	1	0.0856959	0.261985	3'UTR(F),3'UTR(M)	-0.161102	-0.142625	0.410403	0.755875	#N/A	0.99987
LMBRD2	2.94623	1	0.0860782	0.262839	3'UTR(F),3'UTR(L)	-0.243393	#N/A	#N/A	#N/A	#N/A	0.00016404
UBE2H	4.90412	2	0.0861159	0.262839	3'UTR(M),3'UTR(L)	-0.0813696	#N/A	#N/A	#N/A	#N/A	0.94063
CRCP	2.94029	1	0.0863953	0.263478	3'UTR(F),3'UTR(M)	0.336151	#N/A	#N/A	#N/A	#N/A	8.9725e-07
PCMT1	4.89088	2	0.0866879	0.264155	Intron,3'UTR(F),3'UTR(L)	-0.0352653	-0.386725	0.141225	0.571138	#N/A	0.78453
FECH	4.86854	2	0.0876617	0.266905	3'UTR(F),3'UTR(M),3'UTR(L)	-0.193924	-0.297436	0.452581	0.782607	#N/A	0.0027587
SLC36A4	4.86467	2	0.0878315	0.26708	3'UTR(F),3'UTR(M),3'UTR(L)	-0.00313837	#N/A	#N/A	#N/A	#N/A	1.8141e-17
HECTD4	2.91312	1	0.0878619	0.26708	Intron,3'UTR(L)	-0.180145	-0.440606	0.805981	0.936963	#N/A	1
MAPRE2	2.91057	1	0.088001	0.267286	3'UTR(M),3'UTR(L)	0.181976	-0.105937	0.88753	0.965623	#N/A	0.8341
TTPAL	4.84883	2	0.0885301	0.268472	3'UTR(M),3'UTR(L)	0.0517957	#N/A	#N/A	#N/A	#N/A	0.116
PHYHIPL	2.8976	1	0.0887114	0.268472	3'UTR(F),3'UTR(M)	-0.117454	3.77241	0.0396417	0.403298	#N/A	0.82096
TIMP3	4.84352	2	0.0887651	0.268472	3'UTR(M),3'UTR(L)	0.0161938	#N/A	#N/A	#N/A	#N/A	0.63037
SOS1	2.89641	1	0.0887773	0.268472	3'UTR(M),3'UTR(L)	-0.229124	1.13151	0.43631	0.774008	1	1
FAM92A	2.8963	1	0.0887833	0.268472	3'UTR(F),3'UTR(M)	-0.215138	#N/A	#N/A	#N/A	#N/A	#N/A
XPNPEP3	6.52103	3	0.0888367	0.268472	Intron,3'UTR(F),3'UTR(M),3'UTR(L)	0.411069	-0.226549	0.38413	0.739208	1	1.8555e-08
PDHB	2.8943	1	0.0888934	0.268472	3'UTR(M)	0.121372	-0.320019	0.200779	0.631285	#N/A	0.15201
ODF2L	4.8362	2	0.0890906	0.268851	Intron,3'UTR(F),3'UTR(M)	0.0557991	#N/A	#N/A	#N/A	#N/A	5.6731e-19
MED14	2.88617	1	0.0893434	0.269397	3'UTR(M),3'UTR(L)	0.246648	#N/A	#N/A	#N/A	#N/A	1
BTN2A2	4.82527	2	0.089579	0.26989	Intron,3'UTR(F)	0.2138	#N/A	#N/A	#N/A	#N/A	1.3821e-11
ARMC9	2.87652	1	0.0898803	0.270491	Intron	-0.222919	1.71833	0.0731917	0.484009	#N/A	6.2032e-17
PHLDA1	2.87575	1	0.0899228	0.270491	3'UTR(M),3'UTR(L)	-0.117706	#N/A	#N/A	#N/A	#N/A	0.79833
HECTD2	2.87029	1	0.0902287	0.271051	Intron,3'UTR(M)	-0.263078	#N/A	#N/A	#N/A	#N/A	0.99806
UGGT2	2.86984	1	0.0902537	0.271051	Intron,3'UTR(S)	-0.234876	-1.00647	0.385889	0.740057	#N/A	1.3209e-41
DDX52	4.80595	2	0.0904483	0.271417	3'UTR(M)	-0.252707	0.340584	0.814985	0.938285	#N/A	1.5121e-15
TMEM38B	2.86378	1	0.0905942	0.271606	3'UTR(M)	0.160007	-1.36469	0.372253	0.730784	#N/A	0.019501
MSL1	2.86268	1	0.0906562	0.271606	Intron,3'UTR(M)	-0.198866	#N/A	#N/A	#N/A	#N/A	0.9989
RC3H2	2.85142	1	0.091293	0.273123	Intron,3'UTR(L)	-0.283867	#N/A	#N/A	#N/A	#N/A	1
TRIL	2.85116	1	0.0913083	0.273123	3'UTR(M),3'UTR(L)	0.102351	#N/A	#N/A	#N/A	#N/A	#N/A
SMARCE1	2.84895	1	0.0914338	0.273127	3'UTR(F),3'UTR(M)	-0.163847	-0.521234	0.429974	0.769499	1	0.99915
RPIA	2.84737	1	0.0915233	0.273127	3'UTR(F),3'UTR(L)	-0.170045	#N/A	#N/A	#N/A	#N/A	0.00014309
SLC35B3	2.84656	1	0.0915694	0.273127	Intron,3'UTR(L)	0.148992	#N/A	#N/A	#N/A	#N/A	1.3646e-10
NBN	2.846	1	0.0916015	0.273127	3'UTR(F),3'UTR(M)	-0.145113	-1.0305	0.334261	0.721103	1	2.1838e-16
GPX8	2.8446	1	0.0916811	0.273147	3'UTR(F),3'UTR(M)	0.078562	0.804584	0.273836	0.679081	#N/A	0.053068
RBM39	2.84093	1	0.0918911	0.273355	3'UTR(F),3'UTR(M)	-0.255218	-0.0196318	0.93136	0.979803	#N/A	0.99981
TMEM136	2.84067	1	0.0919059	0.273355	3'UTR(F),3'UTR(M),3'UTR(L)	-0.406772	#N/A	#N/A	#N/A	#N/A	0.0050232
ZNF267	2.83955	1	0.0919701	0.273355	3'UTR(F),CDS	-0.296372	#N/A	#N/A	#N/A	#N/A	0.017108
AC012306.2	2.834	1	0.0922883	0.273669	na	-0.471389	#N/A	#N/A	#N/A	#N/A	#N/A
TRIM27	2.83392	1	0.0922926	0.273669	3'UTR(F),3'UTR(L)	-0.129013	#N/A	#N/A	#N/A	#N/A	0.99685
RALGAPA2	2.83389	1	0.0922947	0.273669	3'UTR(F),3'UTR(M),3'UTR(L)	-0.293299	#N/A	#N/A	#N/A	#N/A	3.0325e-17
ATL2	4.75907	2	0.0925936	0.274135	3'UTR(M),3'UTR(L)	-0.124341	1.30318	0.202099	0.632139	#N/A	0.011822
TRIM44	2.82861	1	0.0925983	0.274135	3'UTR(M)	0.106516	#N/A	#N/A	#N/A	#N/A	0.053808
RNF7	2.82667	1	0.0927102	0.274249	3'UTR(F),3'UTR(M)	0.0540142	#N/A	#N/A	#N/A	#N/A	0.032867
BMS1P20	4.75016	2	0.0930071	0.274911	na	-0.0142939	#N/A	#N/A	#N/A	#N/A	#N/A
MAML2	4.74445	2	0.0932728	0.275478	Intron,3'UTR(F),3'UTR(L)	-0.0358313	#N/A	#N/A	#N/A	#N/A	0.99987
ITSN1	4.74182	2	0.0933959	0.275584	Intron	0.532069	-0.344728	0.525917	0.822017	#N/A	1
RAB10	2.81382	1	0.0934558	0.275584	3'UTR(F),3'UTR(M)	-0.183101	-0.0955832	0.85297	0.950217	#N/A	0.97213
SETD5	2.79712	1	0.0944336	0.277992	3'UTR(F),3'UTR(M)	-0.0741516	#N/A	#N/A	#N/A	1	0.99997
OSMR	2.79591	1	0.094505	0.277992	Intron,3'UTR(M)	-0.135298	#N/A	#N/A	#N/A	#N/A	9.2144e-18
ADSS	2.79478	1	0.0945718	0.277992	3'UTR(M)	-0.100585	0.475469	0.150775	0.58166	#N/A	0.32971
ZNF791	2.79474	1	0.0945741	0.277992	3'UTR(F),3'UTR(M)	0.332836	#N/A	#N/A	#N/A	#N/A	0.13394
AP1G1	4.71528	2	0.0946434	0.277992	3'UTR(M),3'UTR(L)	-0.113197	0.277262	0.433087	0.771624	#N/A	0.99998
WFS1	2.77727	1	0.0956108	0.280613	3'UTR(F),3'UTR(L)	0.160452	0.292146	0.600505	0.864192	#N/A	1.6231e-38
MINDY2	4.68749	2	0.0959675	0.281239	3'UTR(F),3'UTR(M),3'UTR(L)	0.0460358	#N/A	#N/A	#N/A	#N/A	#N/A
PITHD1	2.77047	1	0.096018	0.281239	3'UTR(F),3'UTR(L)	0.0578467	0.180667	0.593725	0.860115	#N/A	0.0080936
TIMM8A	2.76995	1	0.0960492	0.281239	3'UTR(M)	-0.301441	#N/A	#N/A	#N/A	1	0.65195
ELP2	6.33662	3	0.0963336	0.281633	3'UTR(F),3'UTR(M),3'UTR(L)	-0.155977	-0.921721	0.173685	0.604207	#N/A	4.1811e-20
SOCS4	2.76521	1	0.0963343	0.281633	3'UTR(F),3'UTR(M),3'UTR(L)	-0.129493	#N/A	#N/A	#N/A	#N/A	1.4208e-05
RIOK3	2.74991	1	0.0972598	0.283936	3'UTR(M)	-0.104134	#N/A	#N/A	#N/A	#N/A	4.7708e-07
MIF-AS1	2.74968	1	0.0972737	0.283936	na	0.318901	#N/A	#N/A	#N/A	#N/A	#N/A
SLC35A2	2.74812	1	0.0973686	0.283992	Intron,3'UTR(S)	0.225477	#N/A	#N/A	#N/A	1	0.71792
SERTAD4	2.74527	1	0.0975425	0.284034	Intron	0.280501	#N/A	#N/A	#N/A	#N/A	0.033943
MSRA	2.74439	1	0.0975964	0.284034	3'UTR(F),3'UTR(L)	-0.404009	-2.73412	0.354121	0.727179	#N/A	1.5332e-15
STK40	2.74415	1	0.0976107	0.284034	3'UTR(F),3'UTR(M),3'UTR(L)	-0.108439	#N/A	#N/A	#N/A	#N/A	0.99624
TBC1D16	4.64822	2	0.0978706	0.284569	3'UTR(F),3'UTR(M),3'UTR(L)	0.226551	#N/A	#N/A	#N/A	#N/A	2.5682e-07
ALDH1B1	4.63824	2	0.0983602	0.285735	3'UTR(F),3'UTR(M),3'UTR(L)	-0.00126282	0.517805	0.022235	0.347547	#N/A	2.6981e-06
MEX3A	2.7309	1	0.0984241	0.285735	3'UTR(F),3'UTR(L)	-0.0583461	-1.82859	0.107055	0.538384	#N/A	0.97977
HPF1	2.72734	1	0.0986432	0.286149	Intron,3'UTR(S)	-0.0979855	0.666869	0.221571	0.647648	#N/A	#N/A
ZNF451	6.27689	3	0.0988891	0.286503	Intron,3'UTR(M)	0.0556406	#N/A	#N/A	#N/A	#N/A	1.5111e-12
NEDD4	2.7229	1	0.0989183	0.286503	3'UTR(F),3'UTR(L)	-0.204614	0.440076	0.62188	0.875383	#N/A	8.7208e-13
DZIP1	4.61935	2	0.0992934	0.287368	Intron,3'UTR(F),3'UTR(M)	-0.154081	#N/A	#N/A	#N/A	#N/A	3.1283e-20
SIAH1	2.71198	1	0.0995975	0.287814	3'UTR(M),3'UTR(L)	-0.117255	#N/A	#N/A	#N/A	#N/A	0.69866
LINC00461	4.61316	2	0.0996012	0.287814	na	-0.00504085	#N/A	#N/A	#N/A	#N/A	#N/A
LRRTM4	2.70727	1	0.0998918	0.288352	Intron,3'UTR(S)	0.383412	#N/A	#N/A	#N/A	#N/A	0.085808
RCC1	2.70555	1	0.0999998	0.288352	3'UTR(F),3'UTR(M)	-0.0346922	0.997361	0.243705	0.664785	#N/A	0.93109
PHTF1	2.70525	1	0.100019	0.288352	Intron,3'UTR(M)	0.224186	#N/A	#N/A	#N/A	#N/A	9.6863e-26
FAM217B	2.70312	1	0.100152	0.288515	3'UTR(M)	0.200198	#N/A	#N/A	#N/A	#N/A	NA
PYGO1	2.69919	1	0.100399	0.289005	3'UTR(M),3'UTR(L)	-0.111743	#N/A	#N/A	#N/A	#N/A	0.98683
USP33	2.6972	1	0.100525	0.289144	Intron,3'UTR(L)	-0.101649	-3.42878	0.210717	0.63878	#N/A	0.86249
ATP2B1	2.68673	1	0.101187	0.290684	3'UTR(M)	-0.0995993	-0.0185261	0.975228	0.993274	#N/A	1
ZZZ3	4.58101	2	0.101215	0.290684	3'UTR(M),3'UTR(L)	0.12051	#N/A	#N/A	#N/A	#N/A	0.99998
TMEM246	2.68222	1	0.101474	0.291203	3'UTR(M)	0.19597	#N/A	#N/A	#N/A	#N/A	0.093873
SMAD9	2.68049	1	0.101585	0.291297	3'UTR(M),3'UTR(L)	-0.277328	#N/A	#N/A	#N/A	#N/A	6.4444e-05
SNX9	2.67823	1	0.101728	0.291487	Intron,3'UTR(M),3'UTR(L)	-0.759174	-0.302614	0.502167	0.810743	#N/A	0.7061
DACT1	2.67539	1	0.10191	0.291784	3'UTR(F),3'UTR(M),3'UTR(L)	0.11625	#N/A	#N/A	#N/A	#N/A	0.40017
HMGA2	2.67311	1	0.102056	0.291979	3'UTR(M)	-0.295994	2.19815	0.000678103	0.169255	#N/A	0.87015
THRAP3	2.66924	1	0.102305	0.292252	3'UTR(M),3'UTR(L)	-0.0734658	0.231055	0.618084	0.874427	#N/A	0.99998
C9orf40	4.55954	2	0.102308	0.292252	3'UTR(F),3'UTR(M),3'UTR(L)	0.0802815	#N/A	#N/A	#N/A	#N/A	0.069726
GPN2	2.65651	1	0.103127	0.294248	3'UTR(F),3'UTR(M)	-0.435959	#N/A	#N/A	#N/A	#N/A	0.01424
EIF2S3	2.65594	1	0.103164	0.294248	3'UTR(M)	-0.0827444	-0.268626	0.201925	0.632139	#N/A	0.96388
TTC26	2.65462	1	0.103249	0.294268	3'UTR(F),3'UTR(M)	-0.14774	#N/A	#N/A	#N/A	#N/A	2.4322e-08
KCNJ2	2.64608	1	0.103806	0.295629	Intron,3'UTR(L)	0.319847	#N/A	#N/A	#N/A	#N/A	0.30653
PRKCQ	2.64249	1	0.104041	0.296073	Intron	-0.177332	#N/A	#N/A	#N/A	#N/A	0.2972
MPHOSPH8	4.51149	2	0.104796	0.297851	Intron,3'UTR(F),3'UTR(L)	-0.000241373	#N/A	#N/A	#N/A	#N/A	0.0014733
HEG1	2.62973	1	0.104879	0.297851	3'UTR(M),3'UTR(L)	-0.173896	#N/A	#N/A	#N/A	#N/A	1.8858e-07
CEBPG	2.62913	1	0.104919	0.297851	3'UTR(F),3'UTR(M)	-0.0861388	#N/A	#N/A	#N/A	#N/A	0.43688
SERINC1	2.62815	1	0.104984	0.297851	3'UTR(M),3'UTR(L)	-0.0531519	-0.148893	0.835937	0.944759	#N/A	0.0074634
SLC39A10	2.62406	1	0.105255	0.298324	3'UTR(M),3'UTR(L)	-0.105511	0.902248	0.224809	0.650744	#N/A	0.9927
VPS26B	2.62324	1	0.105309	0.298324	3'UTR(F),3'UTR(M),3'UTR(L)	-0.180855	0.397339	0.149111	0.580946	#N/A	0.9665
DMXL1	2.61857	1	0.10562	0.298976	Intron,3'UTR(M)	0.390207	#N/A	#N/A	#N/A	#N/A	1
STK32C	2.61071	1	0.106144	0.300015	Intron,3'UTR(S)	-0.241533	#N/A	#N/A	#N/A	#N/A	0.20408
NDE1	2.61067	1	0.106147	0.300015	Intron,3'UTR(F)	-0.000558422	#N/A	#N/A	#N/A	1	0.0066921
ASXL1	7.62429	4	0.106352	0.300368	Intron,3'UTR(F),3'UTR(M),3'UTR(L)	0.0397461	#N/A	#N/A	#N/A	1	1.2511e-14
DESI2	2.60544	1	0.106498	0.300385	3'UTR(M),3'UTR(L)	0.0116385	#N/A	#N/A	#N/A	#N/A	0.8483
PRDM2	4.47746	2	0.106594	0.300385	Intron,3'UTR(L)	-0.0671863	#N/A	#N/A	#N/A	#N/A	0.99996
RABIF	4.47737	2	0.106598	0.300385	3'UTR(M)	-0.284006	1.69328	0.509004	0.814445	#N/A	0.014371
CKMT2-AS1	2.60073	1	0.106815	0.300768	na	-0.649499	#N/A	#N/A	#N/A	#N/A	#N/A
EPS15L1	2.59277	1	0.107352	0.301627	Intron	-0.267954	-0.0664051	0.867262	0.955779	#N/A	0.99964
IFT88	2.5927	1	0.107357	0.301627	Intron,3'UTR(S)	0.280772	#N/A	#N/A	#N/A	#N/A	7.1224e-11
RECK	2.59264	1	0.107361	0.301627	Intron,3'UTR(L)	0.105459	#N/A	#N/A	#N/A	#N/A	1.9319e-10
FZD8	2.58487	1	0.107889	0.302882	3'UTR(F),3'UTR(L)	-0.112909	#N/A	#N/A	#N/A	#N/A	0.78983
GGNBP2	2.58258	1	0.108045	0.303093	3'UTR(F),3'UTR(L)	-0.161516	#N/A	#N/A	#N/A	#N/A	1
ERLEC1	2.58089	1	0.108161	0.30319	3'UTR(F),3'UTR(M),3'UTR(L)	-0.163876	0.983206	0.255092	0.670221	#N/A	3.25e-06
TDRP	2.57762	1	0.108385	0.303258	Intron,3'UTR(M)	-0.112447	#N/A	#N/A	#N/A	#N/A	1.5111e-09
FIP1L1	2.57723	1	0.108412	0.303258	3'UTR(F),3'UTR(M)	-0.240923	0.077769	0.908446	0.973389	#N/A	0.7889
HIPK2	2.57699	1	0.108428	0.303258	3'UTR(M),3'UTR(L)	-0.14329	#N/A	#N/A	#N/A	#N/A	1
CHPT1	2.5753	1	0.108544	0.303356	Intron,3'UTR(F),3'UTR(M)	-0.0823249	#N/A	#N/A	#N/A	#N/A	0.00024252
KCNQ1	4.43865	2	0.108682	0.303516	Intron,3'UTR(F)	0.0340426	#N/A	#N/A	#N/A	#N/A	4.5453e-08
VPS36	6.05856	3	0.108795	0.303606	3'UTR(M)	-0.201795	0.250139	0.640302	0.885283	#N/A	0.046442
LINC00632	2.56875	1	0.108994	0.303934	na	-0.183666	#N/A	#N/A	#N/A	#N/A	0.089251
MKL1	2.55933	1	0.109645	0.30552	Intron,3'UTR(S)	-0.181492	#N/A	#N/A	#N/A	#N/A	0.99768
PURA	4.41655	2	0.10989	0.305976	3'UTR(F),3'UTR(M)	0.060114	0.128461	0.678538	0.89881	1	0.94029
DICER1	2.5541	1	0.110008	0.306078	3'UTR(M),3'UTR(L)	-0.198947	-0.062917	0.959566	0.98972	#N/A	1
ATAD1	4.40932	2	0.110288	0.306344	3'UTR(F),3'UTR(M)	-0.0559422	1.03637	0.0445062	0.414505	#N/A	0.0013367
C5orf24	2.54867	1	0.110387	0.306344	Intron,3'UTR(F)	0.0647403	#N/A	#N/A	#N/A	#N/A	0.73025
PAX5	2.54786	1	0.110444	0.306344	Intron,5UTR	-0.469971	#N/A	#N/A	#N/A	#N/A	0.99798
PEAK1	2.54743	1	0.110474	0.306344	3'UTR(F),3'UTR(L)	-0.205947	1.28904	0.434618	0.77293	#N/A	0.00086831
RBM22	2.54687	1	0.110513	0.306344	3'UTR(M),3'UTR(L)	0.281371	2.00827	0.0833995	0.502733	#N/A	0.99947
TOM1L2	2.54267	1	0.110807	0.306932	3'UTR(F),3'UTR(L)	-0.349303	0.746459	0.130594	0.563442	#N/A	0.0015723
PCDH7	4.39726	2	0.110955	0.307115	Intron,3'UTR(S)	-0.116371	-0.611247	0.620861	0.875025	#N/A	0.39505
INIP	2.53781	1	0.111149	0.307424	3'UTR(M)	-0.224705	1.65114	0.353994	0.727179	#N/A	0.032654
DPH6	2.52546	1	0.112022	0.309535	3'UTR(F),3'UTR(M)	-0.560904	#N/A	#N/A	#N/A	#N/A	1.1419e-05
ANP32E	2.52469	1	0.112077	0.309535	3'UTR(F),3'UTR(L)	-0.177399	0.16345	0.464985	0.788989	#N/A	0.84376
USP14	4.36832	2	0.112572	0.310672	3'UTR(M)	-0.189225	0.094358	0.597149	0.862549	#N/A	0.90546
KNDC1	2.51298	1	0.112912	0.311381	3'UTR(F),3'UTR(L)	0.463816	#N/A	#N/A	#N/A	#N/A	0.0019859
TMEM201	2.51093	1	0.113059	0.311557	Intron,3'UTR(S)	-0.115489	1.40171	0.0799691	0.492436	#N/A	0.99004
TLN2	2.50916	1	0.113186	0.311587	3'UTR(M)	0.191179	0.00911873	0.978369	0.993749	#N/A	0.99231
POC1B	2.50846	1	0.113236	0.311587	Intron,3'UTR(L)	0.24511	#N/A	#N/A	#N/A	#N/A	3.0483e-08
LIMK2	2.50661	1	0.11337	0.311703	Intron,3'UTR(F),3'UTR(M)	-0.195748	#N/A	#N/A	#N/A	#N/A	0.01561
MEGF9	2.50556	1	0.113445	0.311703	3'UTR(F),3'UTR(L)	-0.175506	#N/A	#N/A	#N/A	#N/A	0.9881
FAM120B	2.50317	1	0.113618	0.311948	Intron,3'UTR(F)	0.0847815	-0.850115	0.29389	0.694242	#N/A	7.4692e-11
TBX2	2.50014	1	0.113836	0.31232	3'UTR(F),3'UTR(M)	0.332696	#N/A	#N/A	#N/A	#N/A	0.99329
FAM136A	2.49583	1	0.114148	0.312838	3'UTR(M),3'UTR(L)	-0.117333	-0.469692	0.104406	0.535184	#N/A	0.00058595
IFRD1	2.49523	1	0.114192	0.312838	3'UTR(F),3'UTR(M)	-0.0535634	#N/A	#N/A	#N/A	#N/A	0.0012141
CLSTN1	2.49266	1	0.114378	0.313091	3'UTR(F),3'UTR(L)	-0.0382839	#N/A	#N/A	#N/A	#N/A	0.97757
GPN1	2.49165	1	0.114452	0.313091	3'UTR(M)	0.0668225	#N/A	#N/A	#N/A	#N/A	5.5764e-05
KBTBD7	4.32919	2	0.114796	0.313805	3'UTR(F),3'UTR(M),3'UTR(L)	-0.220028	#N/A	#N/A	#N/A	#N/A	3.5716e-06
SPRYD4	2.48499	1	0.114937	0.313961	3'UTR(M)	-0.563838	-5.38856	0.0165947	0.332693	#N/A	0.0079114
NEK4	4.31537	2	0.115592	0.315519	3'UTR(F),3'UTR(M),3'UTR(L)	-0.0933705	#N/A	#N/A	#N/A	#N/A	8.6883e-27
AKAP6	4.31365	2	0.115692	0.315562	Intron,3'UTR(F),3'UTR(L)	0.120488	#N/A	#N/A	#N/A	#N/A	0.99983
NDUFAF4	2.468	1	0.116185	0.316677	3'UTR(F),3'UTR(L)	-0.0413969	#N/A	#N/A	#N/A	#N/A	0.55344
ECM1	2.46366	1	0.116507	0.317322	3'UTR(F),3'UTR(M)	0.254269	#N/A	#N/A	#N/A	#N/A	4.6627e-14
GRK3	2.46094	1	0.116709	0.317603	3'UTR(F),3'UTR(L)	0.032108	#N/A	#N/A	#N/A	#N/A	#N/A
NTPCR	2.45999	1	0.11678	0.317603	3'UTR(F),CDS,3'UTR(M)	-0.130166	0.999352	0.111096	0.540338	#N/A	0.0025124
SDK2	4.29212	2	0.116944	0.317819	3'UTR(F),3'UTR(M),3'UTR(L)	0.271227	#N/A	#N/A	#N/A	#N/A	0.0041393
PRRC2B	2.45178	1	0.117392	0.318588	3'UTR(F),3'UTR(M)	-0.147458	#N/A	#N/A	#N/A	#N/A	1
SEC14L1	4.28439	2	0.117397	0.318588	Intron,3'UTR(S)	0.0796611	#N/A	#N/A	#N/A	#N/A	0.63264
KIF13A	2.4498	1	0.11754	0.318744	Intron,3'UTR(M)	-0.012865	#N/A	#N/A	#N/A	#N/A	0.99999
PPP1R13B	2.44516	1	0.117888	0.319343	3'UTR(M),3'UTR(L)	0.400375	#N/A	#N/A	#N/A	#N/A	0.99811
MANEA	2.44459	1	0.117931	0.319343	3'UTR(F),3'UTR(M),3'UTR(L)	-0.12166	#N/A	#N/A	#N/A	#N/A	0.00052273
RNASEH2B	2.44234	1	0.1181	0.319518	Intron,3'UTR(S)	0.383129	#N/A	#N/A	#N/A	1	3.2569e-09
RNF216	2.44146	1	0.118166	0.319518	3'UTR(F),3'UTR(M),3'UTR(L)	0.216515	#N/A	#N/A	#N/A	#N/A	2.2561e-06
KIF27	2.43771	1	0.118449	0.320051	Intron,3'UTR(L)	0.191207	#N/A	#N/A	#N/A	#N/A	1.7585e-24
HPS4	2.43285	1	0.118817	0.320451	Intron	-0.104046	#N/A	#N/A	#N/A	#N/A	0.00013778
FNDC3A	4.26005	2	0.118834	0.320451	3'UTR(F),CDS,3'UTR(M)	0.259177	4.19206	0.105863	0.536516	#N/A	0.99998
GPATCH11	2.43236	1	0.118854	0.320451	3'UTR(F),3'UTR(M),3'UTR(L)	-0.167353	#N/A	#N/A	#N/A	#N/A	1.1151e-07
PPP2R3A	2.42863	1	0.119137	0.320983	3'UTR(F),3'UTR(L)	-0.169475	#N/A	#N/A	#N/A	#N/A	0.62349
MAU2	2.42528	1	0.119392	0.321326	3'UTR(F),3'UTR(M)	-0.0997874	#N/A	#N/A	#N/A	#N/A	1
THAP1	2.42434	1	0.119464	0.321326	3'UTR(M),3'UTR(L)	-0.117452	#N/A	#N/A	#N/A	#N/A	0.80123
ABHD2	2.42358	1	0.119521	0.321326	3'UTR(F),3'UTR(L)	-0.181039	#N/A	#N/A	#N/A	#N/A	0.68151
RALGAPB	4.24704	2	0.11961	0.321334	3'UTR(F),3'UTR(M)	-0.0245522	2.72461	0.113393	0.540338	#N/A	1
PGM2	2.41312	1	0.120322	0.322791	3'UTR(F),3'UTR(M),3'UTR(L)	-0.271338	-0.125146	0.519704	0.821935	#N/A	5.0352e-12
RBM34	2.4128	1	0.120347	0.322791	3'UTR(F),3'UTR(L)	-0.0887153	1.47498	0.163841	0.593668	#N/A	4.6408e-15
TNFRSF10B	2.41197	1	0.120411	0.322791	3'UTR(F),3'UTR(M),3'UTR(L)	-0.0526095	#N/A	#N/A	#N/A	#N/A	0.00019928
KIAA0141	5.81496	3	0.120968	0.324053	Intron,3'UTR(F)	0.249071	#N/A	#N/A	#N/A	#N/A	1.2229e-17
MEAF6	2.40193	1	0.121185	0.324403	3'UTR(M)	0.0322286	#N/A	#N/A	#N/A	#N/A	0.12785
PIAS2	5.80886	3	0.121289	0.324448	3'UTR(M)	0.00231481	#N/A	#N/A	#N/A	#N/A	0.99718
ULK4	2.39619	1	0.121631	0.325131	Intron,3'UTR(M)	0.521959	#N/A	#N/A	#N/A	#N/A	4.4336e-38
UTP15	4.20285	2	0.122282	0.326638	3'UTR(F),3'UTR(M)	0.00657732	#N/A	#N/A	#N/A	#N/A	0.99993
FBXL5	2.3861	1	0.122419	0.32677	3'UTR(F),3'UTR(M),3'UTR(L)	-0.160252	#N/A	#N/A	#N/A	#N/A	0.99854
NUP155	4.18925	2	0.123116	0.328363	3'UTR(F),3'UTR(M)	-0.0505636	0.82525	0.256928	0.671863	#N/A	0.65349
NEDD4L	5.77302	3	0.123191	0.328363	3'UTR(F),3'UTR(M),3'UTR(L)	0.0101084	3.17677	0.0659849	0.47143	1	1
IMPACT	2.37336	1	0.123421	0.328669	3'UTR(M),3'UTR(L)	-0.381971	-0.156422	0.828486	0.941396	#N/A	4.8274e-08
NEAT1	2.3726	1	0.123481	0.328669	na	0.102901	#N/A	#N/A	#N/A	#N/A	#N/A
EVI5	2.37053	1	0.123645	0.328872	3'UTR(F),3'UTR(L)	0.033875	#N/A	#N/A	#N/A	#N/A	1.9654e-11
TRAF3IP1	2.36844	1	0.12381	0.329077	3'UTR(F),3'UTR(M)	0.0300501	#N/A	#N/A	#N/A	#N/A	1.9085e-08
TOPBP1	2.3663	1	0.123981	0.329207	3'UTR(M),3'UTR(L)	0.171791	#N/A	#N/A	#N/A	#N/A	1
LARP1B	2.36562	1	0.124035	0.329207	Intron	-0.123371	#N/A	#N/A	#N/A	#N/A	1.5265e-11
PCF11	4.16701	2	0.124493	0.330189	Intron,3'UTR(F),3'UTR(L)	-0.0803033	#N/A	#N/A	#N/A	#N/A	1
C11orf54	2.34987	1	0.125294	0.332077	3'UTR(M)	-0.168577	-1.25869	0.072341	0.484009	#N/A	2.8718e-08
MED29	5.73	3	0.125511	0.332335	CDS,3'UTR(M)	-0.0350512	#N/A	#N/A	#N/A	#N/A	0.0010191
RNF123	2.34538	1	0.125655	0.332335	3'UTR(F),3'UTR(L)	0.170997	-0.929223	0.421005	0.761928	#N/A	8.4689e-05
EXOSC2	2.34535	1	0.125657	0.332335	3'UTR(F),3'UTR(M)	0.224892	0.0431071	0.942583	0.985006	#N/A	2.8854e-06
BAG4	2.344	1	0.125766	0.332389	3'UTR(F),3'UTR(M),3'UTR(L)	-0.246436	#N/A	#N/A	#N/A	#N/A	0.00018708
SEZ6L2	2.34219	1	0.125913	0.332541	3'UTR(F),3'UTR(L)	0.145203	#N/A	#N/A	#N/A	#N/A	0.11743
SPATA33	2.33934	1	0.126143	0.332914	3'UTR(F),3'UTR(M)	0.201526	#N/A	#N/A	#N/A	#N/A	0.0001257
TJP1	2.33818	1	0.126237	0.332928	3'UTR(F),3'UTR(M)	-0.155135	0.110646	0.795953	0.935136	#N/A	1
MANEAL	2.33334	1	0.12663	0.333574	3'UTR(M)	-0.133396	#N/A	#N/A	#N/A	#N/A	0.004939
ROCK2	2.33297	1	0.12666	0.333574	3'UTR(M)	-0.124966	0.282538	0.601373	0.864647	#N/A	1
TMX4	4.12447	2	0.127169	0.33468	3'UTR(M),3'UTR(L)	0.0738269	1.06438	0.150961	0.581929	#N/A	0.044153
ANTXR1	2.32499	1	0.127311	0.334692	Intron,3'UTR(M)	-0.0738729	-0.380375	0.806429	0.936963	1	0.98631
GNAI2	2.3241	1	0.127384	0.334692	3'UTR(F),3'UTR(M)	-0.0563074	0.0620824	0.787839	0.93173	#N/A	0.89194
ZKSCAN3	5.69477	3	0.127442	0.334692	Intron,3'UTR(F),3'UTR(M),3'UTR(L)	0.000112192	#N/A	#N/A	#N/A	#N/A	1.9697e-11
LOC339975	2.31907	1	0.127796	0.335387	na	-0.122939	#N/A	#N/A	#N/A	#N/A	#N/A
PPP1R3E	2.31593	1	0.128055	0.33583	Intron,3'UTR(M)	-0.503463	#N/A	#N/A	#N/A	#N/A	0.23729
OTUD1	2.31409	1	0.128206	0.335992	3'UTR(F),3'UTR(M)	-0.277853	#N/A	#N/A	#N/A	#N/A	0.65091
ATG13	2.31087	1	0.128472	0.336454	3'UTR(M),3'UTR(L)	-0.147565	#N/A	#N/A	#N/A	#N/A	0.96359
CAPZA2	2.30573	1	0.128898	0.337221	3'UTR(F),3'UTR(M)	0.1096	0.036146	0.880492	0.963207	#N/A	0.99828
CDT1	2.3041	1	0.129033	0.337221	3'UTR(F),3'UTR(M)	-0.126797	#N/A	#N/A	#N/A	#N/A	2.5825e-10
CDC42BPA	4.09533	2	0.129036	0.337221	Intron,3'UTR(M),3'UTR(L)	-0.22357	1.24774	0.27201	0.678938	#N/A	0.99309
DIEXF	2.29715	1	0.129612	0.33849	3'UTR(M),3'UTR(L)	0.18828	#N/A	#N/A	#N/A	#N/A	1.2381e-06
CALD1	4.0811	2	0.129957	0.339126	Intron,3'UTR(F),3'UTR(M)	0.0713412	0.625237	0.114851	0.541906	#N/A	0.99879
MUT	2.29129	1	0.130101	0.339126	3'UTR(M),3'UTR(L)	-0.0626232	#N/A	#N/A	#N/A	1	1.7087e-22
SRSF12	2.29086	1	0.130138	0.339126	3'UTR(F),3'UTR(M),3'UTR(L)	-0.438351	#N/A	#N/A	#N/A	#N/A	0.033102
RAB3B	2.28992	1	0.130217	0.339126	3'UTR(M),3'UTR(L)	0.129483	1.68452	0.663045	0.893904	#N/A	0.31473
TMEM254	2.2862	1	0.130529	0.339598	3'UTR(F),3'UTR(M)	-0.059282	#N/A	#N/A	#N/A	#N/A	0.0013335
TBC1D1	2.28486	1	0.130642	0.339598	3'UTR(F),3'UTR(L)	-0.038462	#N/A	#N/A	#N/A	#N/A	1.8584e-13
TRUB1	2.28452	1	0.130671	0.339598	Intron,3'UTR(S)	-0.0935559	-1.57614	0.132114	0.564641	#N/A	2.3333e-06
RXRA	5.63366	3	0.13086	0.339625	3'UTR(F),3'UTR(M)	-0.343897	#N/A	#N/A	#N/A	#N/A	0.99852
AC104825.2	2.28055	1	0.131005	0.339625	na	0.223202	#N/A	#N/A	#N/A	#N/A	#N/A
CDKN1B	2.28021	1	0.131034	0.339625	3'UTR(M)	-0.124883	#N/A	#N/A	#N/A	#N/A	0.62376
CDH7	4.06445	2	0.131044	0.339625	Intron	-0.217264	#N/A	#N/A	#N/A	#N/A	0.5975
FLNB	2.27603	1	0.131387	0.340281	3'UTR(F),3'UTR(L)	-0.231016	0.41724	0.081789	0.500586	#N/A	6.0505e-10
PSMD12	4.05638	2	0.131573	0.340527	3'UTR(M),3'UTR(L)	0.19031	-0.0997844	0.772829	0.927395	#N/A	0.99984
ZNF280D	2.27236	1	0.131699	0.340616	Intron,3'UTR(M),3'UTR(L)	0.480023	#N/A	#N/A	#N/A	#N/A	0.046841
DNAJB6	2.27044	1	0.131863	0.340805	Intron,3'UTR(F)	0.116195	0.280444	0.374694	0.731193	#N/A	0.85436
PNO1	2.26553	1	0.132281	0.341649	3'UTR(M)	0.364011	#N/A	#N/A	#N/A	#N/A	0.22652
UBE2D1	2.26213	1	0.132572	0.342165	3'UTR(F),3'UTR(L)	-0.162806	-1.87691	0.309818	0.704606	#N/A	0.11989
NCBP3	2.26045	1	0.132716	0.3423	3'UTR(M)	-0.0691977	-1.32403	0.552431	0.836691	#N/A	#N/A
THBS2	2.25653	1	0.133052	0.342924	3'UTR(M),3'UTR(L)	-0.0429523	0.665635	0.0326846	0.381866	#N/A	0.55641
GON4L	2.2555	1	0.13314	0.342924	3'UTR(F),3'UTR(M)	0.0336967	#N/A	#N/A	#N/A	#N/A	0.9515
PPM1H	2.24766	1	0.133816	0.344428	Intron,3'UTR(L)	0.147578	#N/A	#N/A	#N/A	#N/A	0.79216
TTC17	2.24635	1	0.13393	0.344484	3'UTR(F),3'UTR(L)	0.226245	#N/A	#N/A	#N/A	#N/A	0.99996
STAT1	2.24427	1	0.13411	0.344709	Intron,3'UTR(M)	-0.0436809	0.387664	0.160365	0.593231	#N/A	0.99999
ZMYM4	2.23944	1	0.13453	0.345475	3'UTR(F),3'UTR(M)	-0.196869	#N/A	#N/A	#N/A	#N/A	1
ZNF597	2.23872	1	0.134592	0.345475	3'UTR(F),3'UTR(L)	0.257876	#N/A	#N/A	#N/A	#N/A	0.065558
MRPS7	2.23325	1	0.13507	0.346334	Intron,3'UTR(F),3'UTR(M)	0.126384	4.09958	0.215855	0.641501	#N/A	0.0012591
CHD3	2.23276	1	0.135112	0.346334	3'UTR(F),3'UTR(L)	0.184912	0.244766	0.790406	0.93213	#N/A	1
ATP6V1C1	5.55788	3	0.135217	0.346367	3'UTR(F),3'UTR(M)	-0.00984019	0.886859	0.114204	0.540338	#N/A	0.00015353
AQR	2.22962	1	0.135387	0.346565	3'UTR(M),3'UTR(L)	-0.0644442	0.0166227	0.99271	0.99711	#N/A	1
NMRK1	2.22159	1	0.136093	0.348134	3'UTR(F),3'UTR(L)	-0.484591	#N/A	#N/A	#N/A	#N/A	3.5697e-08
PANK3	3.98711	2	0.136211	0.348197	3'UTR(M)	-0.234733	#N/A	#N/A	#N/A	#N/A	4.5167e-05
SULF1	3.97241	2	0.137215	0.350398	3'UTR(F),3'UTR(M),3'UTR(L)	0.023387	0.926227	0.271737	0.678893	#N/A	0.0013751
SIX4	2.20843	1	0.137259	0.350398	3'UTR(M),3'UTR(L)	-0.178869	#N/A	#N/A	#N/A	#N/A	0.69464
ZXDC	5.52008	3	0.137443	0.350629	Intron,3'UTR(S)	-0.258604	#N/A	#N/A	#N/A	#N/A	1.1449e-09
INVS	2.20448	1	0.13761	0.350816	3'UTR(F),3'UTR(M)	-0.0951832	#N/A	#N/A	#N/A	#N/A	5.5501e-18
GABBR1	2.20148	1	0.137879	0.351138	Intron,3'UTR(L)	0.0601023	#N/A	#N/A	#N/A	#N/A	0.99991
ZZEF1	2.20097	1	0.137924	0.351138	3'UTR(F),3'UTR(M),3'UTR(L)	0.270025	#N/A	#N/A	#N/A	#N/A	0.83468
RGS17	2.19942	1	0.138062	0.351253	3'UTR(M),3'UTR(L)	-0.0748004	#N/A	#N/A	#N/A	#N/A	0.26684
CPNE3	2.19743	1	0.138241	0.351384	3'UTR(F),3'UTR(M)	-0.119071	0.0601241	0.879152	0.963137	#N/A	1.7777e-25
NOP9	3.95663	2	0.138302	0.351384	3'UTR(F),3'UTR(M),3'UTR(L)	-0.0576053	1.44349	0.447204	0.779756	#N/A	1.6985e-11
VPS26A	2.18962	1	0.138943	0.35277	3'UTR(F),3'UTR(M)	-0.0927774	-0.212319	0.366636	0.729364	#N/A	0.61411
API5	2.18825	1	0.139067	0.35277	3'UTR(M)	-0.11822	-0.170962	0.696634	0.90586	#N/A	0.99996
SLC35B4	2.18746	1	0.139139	0.35277	3'UTR(M)	-0.303474	#N/A	#N/A	#N/A	#N/A	2.6127e-05
ARHGAP15	2.18651	1	0.139224	0.35277	Intron	-0.129441	#N/A	#N/A	#N/A	#N/A	1.372e-08
SMC2	3.93938	2	0.1395	0.353231	3'UTR(F),3'UTR(M)	0.00931324	-0.00461465	0.995835	0.998546	#N/A	0.9999
USP38	2.18224	1	0.139611	0.353273	3'UTR(F),3'UTR(M)	0.149587	#N/A	#N/A	#N/A	#N/A	3.8483e-07
CREB1	2.18075	1	0.139747	0.353376	Intron,3'UTR(M)	-0.115637	-0.539175	0.227186	0.652539	#N/A	0.99673
PTCHD1	2.17971	1	0.139841	0.353376	Intron,3'UTR(S)	0.165261	#N/A	#N/A	#N/A	#N/A	0.98224
RRNAD1	2.17801	1	0.139995	0.353527	Intron,3'UTR(S)	-0.167735	#N/A	#N/A	#N/A	#N/A	1.403e-11
GALNT15	2.17534	1	0.140238	0.353871	Intron	0.259173	#N/A	#N/A	#N/A	#N/A	3.6481e-18
PWWP2A	3.92766	2	0.14032	0.353871	Intron,3'UTR(F),3'UTR(L)	0.072448	#N/A	#N/A	#N/A	#N/A	0.98292
BMPR2	3.92076	2	0.140805	0.354855	3'UTR(F),3'UTR(M)	0.0724058	#N/A	#N/A	#N/A	#N/A	0.99998
MBOAT2	3.91903	2	0.140927	0.354924	3'UTR(M),3'UTR(L)	-0.088955	#N/A	#N/A	#N/A	#N/A	0.51629
ZKSCAN1	2.16486	1	0.141198	0.355366	Intron	-0.0454289	#N/A	#N/A	#N/A	#N/A	0.96937
MSANTD2	2.16024	1	0.141622	0.356196	3'UTR(M)	0.110108	#N/A	#N/A	#N/A	#N/A	0.90277
SNX14	2.15749	1	0.141876	0.356595	3'UTR(F),3'UTR(L)	0.0272905	#N/A	#N/A	#N/A	1	6.0711e-17
NUCKS1	2.15489	1	0.142116	0.356959	3'UTR(M)	-0.128127	-0.190617	0.46851	0.790495	#N/A	0.96937
ANKRD6	3.89578	2	0.142575	0.35787	Intron,3'UTR(M)	-0.426041	#N/A	#N/A	#N/A	#N/A	1.1728e-11
STAM	2.14236	1	0.143281	0.35917	3'UTR(M),3'UTR(L)	-0.123478	-0.16555	0.580925	0.852743	#N/A	0.85048
SWAP70	3.88585	2	0.143284	0.35917	3'UTR(F),3'UTR(M),3'UTR(L)	0.0880632	0.113367	0.709766	0.90779	#N/A	0.049628
SMIM12	2.13978	1	0.143522	0.359526	3'UTR(M)	-0.0722804	#N/A	#N/A	#N/A	#N/A	0.56679
CADM3	2.1361	1	0.143867	0.360148	3'UTR(F),3'UTR(M)	0.276179	#N/A	#N/A	#N/A	#N/A	0.93386
WDYHV1	2.13413	1	0.144052	0.360371	Intron	-0.158601	#N/A	#N/A	#N/A	#N/A	8.2435e-06
WNT5A	3.86692	2	0.144647	0.361616	3'UTR(M),3'UTR(L)	-0.0234945	#N/A	#N/A	#N/A	#N/A	0.98732
C1orf50	2.12356	1	0.145049	0.36238	3'UTR(F),3'UTR(M)	-0.229652	#N/A	#N/A	#N/A	#N/A	0.026595
JRKL	2.11503	1	0.145859	0.364127	3'UTR(M)	0.427099	#N/A	#N/A	#N/A	#N/A	0.00020034
UBE2J1	3.8487	2	0.14597	0.364127	3'UTR(M)	-0.184196	1.26262	0.352664	0.727179	#N/A	0.43658
RALGPS2	2.11314	1	0.14604	0.364127	3'UTR(M)	-0.0926333	#N/A	#N/A	#N/A	#N/A	0.26225
CREBL2	5.37477	3	0.146323	0.364411	3'UTR(F),3'UTR(M)	-0.136682	#N/A	#N/A	#N/A	#N/A	0.72167
NTRK2	2.10991	1	0.146348	0.364411	Intron	-0.0993998	#N/A	#N/A	#N/A	#N/A	1
GM2A	2.10351	1	0.146961	0.365415	3'UTR(M),3'UTR(L)	-0.0598262	0.531976	0.0569863	0.449688	1	0.03103
YIPF2	3.83502	2	0.146972	0.365415	3'UTR(F),3'UTR(M)	0.0288539	#N/A	#N/A	#N/A	#N/A	4.3157e-08
GPCPD1	3.83389	2	0.147056	0.365415	Intron,3'UTR(M),3'UTR(L)	-0.179829	2.07476	0.0343429	0.384313	#N/A	0.2018
SLC16A6	2.10163	1	0.147142	0.365415	3'UTR(M)	-0.315165	#N/A	#N/A	#N/A	#N/A	0.0019063
ZFP28	2.09963	1	0.147335	0.365652	Intron,3'UTR(F)	0.415444	#N/A	#N/A	#N/A	#N/A	0.00021901
BPHL	3.82709	2	0.147556	0.365959	3'UTR(F),3'UTR(M),3'UTR(L)	-0.158282	-0.38792	0.273007	0.679081	#N/A	4.5804e-07
TMEM39A	3.82419	2	0.147771	0.366175	3'UTR(M)	-0.189804	#N/A	#N/A	#N/A	#N/A	0.95467
PROS1	2.09441	1	0.147839	0.366175	3'UTR(F),3'UTR(M),3'UTR(L)	-0.140105	-0.39721	0.668378	0.896885	#N/A	0.00047089
RAB11A	2.08929	1	0.148335	0.367161	3'UTR(F),3'UTR(M)	-0.157713	#N/A	#N/A	#N/A	#N/A	0.99151
EPM2AIP1	2.08686	1	0.148571	0.367421	3'UTR(M)	-0.170706	-0.334772	0.523111	0.822017	#N/A	0.59998
AIMP1	3.81251	2	0.148636	0.367421	3'UTR(F),3'UTR(M),3'UTR(L)	0.0652473	-0.162122	0.610518	0.870275	1	3.0411e-07
MRS2	2.08478	1	0.148773	0.367518	3'UTR(F),3'UTR(M)	0.359417	#N/A	#N/A	#N/A	#N/A	1.9516e-08
USP11	2.07965	1	0.149274	0.368511	3'UTR(F),3'UTR(M),3'UTR(L)	-0.0428601	0.483538	0.179156	0.611171	#N/A	0.99996
CTPS1	3.8017	2	0.149441	0.368681	3'UTR(F),3'UTR(M),3'UTR(L)	0.163221	0.689263	0.0684868	0.478487	#N/A	0.99259
YIPF6	6.7412	4	0.150213	0.370341	3'UTR(F),3'UTR(M),3'UTR(L)	-0.121793	#N/A	#N/A	#N/A	#N/A	0.89735
DCLRE1B	2.06664	1	0.150553	0.370771	3'UTR(F),3'UTR(M),3'UTR(L)	0.128777	#N/A	#N/A	#N/A	#N/A	0.53912
FAM118B	2.06631	1	0.150585	0.370771	3'UTR(M)	0.18523	#N/A	#N/A	#N/A	#N/A	0.019345
PPCS	2.06441	1	0.150773	0.370831	Intron,3'UTR(S)	0.0940174	0.267219	0.430377	0.769499	#N/A	0.0080389
RGMB	2.06374	1	0.15084	0.370831	3'UTR(F),3'UTR(M),3'UTR(L)	0.18239	#N/A	#N/A	#N/A	#N/A	0.071955
RNF157	2.06191	1	0.151021	0.370831	Intron,3'UTR(L)	-0.319198	#N/A	#N/A	#N/A	#N/A	6.3025e-09
PCYOX1	3.77989	2	0.15108	0.370831	3'UTR(F),3'UTR(M),3'UTR(L)	-0.0717573	0.0401215	0.825435	0.940984	#N/A	2.2481e-15
AK3	3.77956	2	0.151105	0.370831	3'UTR(M)	-0.0750028	-0.128777	0.568139	0.845308	#N/A	0.0001135
LRRC1	2.0563	1	0.151578	0.371438	3'UTR(F),3'UTR(M)	-0.464126	#N/A	#N/A	#N/A	#N/A	0.93181
SYNPO	2.05507	1	0.1517	0.371438	Intron,3'UTR(S)	0.15419	-0.305907	0.522589	0.822017	#N/A	0.98573
LPAR6	2.05444	1	0.151763	0.371438	CDS,3'UTR(L)	-0.4163	#N/A	#N/A	#N/A	#N/A	0.0007129
FAM199X	2.0537	1	0.151837	0.371438	3'UTR(M),3'UTR(L)	-0.0756637	#N/A	#N/A	#N/A	#N/A	0.57269
TMEM80	2.05359	1	0.151848	0.371438	Intron	-0.11311	#N/A	#N/A	#N/A	#N/A	4.5227e-09
SLC22A5	2.05184	1	0.152023	0.371622	Intron,3'UTR(L)	-0.606155	#N/A	#N/A	#N/A	#N/A	5.2651e-16
EFNA5	2.04564	1	0.152643	0.372895	3'UTR(M),3'UTR(L)	-0.242691	#N/A	#N/A	#N/A	#N/A	0.96051
MAPK8IP2	2.04448	1	0.15276	0.372937	3'UTR(F),3'UTR(L)	0.0205738	#N/A	#N/A	#N/A	#N/A	0.99997
NT5E	3.7464	2	0.153631	0.374819	Intron,3'UTR(M)	-0.132973	-0.847433	0.126873	0.561481	#N/A	2.2881e-11
IPPK	2.03434	1	0.153781	0.374942	3'UTR(M),3'UTR(L)	0.122957	#N/A	#N/A	#N/A	#N/A	0.8741
PDE1A	2.03027	1	0.154193	0.375608	Intron	0.0724948	#N/A	#N/A	#N/A	#N/A	0.013549
COL5A2	2.02956	1	0.154265	0.375608	3'UTR(M),3'UTR(L)	-0.0969551	0.710532	0.172002	0.600029	#N/A	1
SMAD6	2.02812	1	0.154412	0.375608	Intron,3'UTR(F)	-0.134998	#N/A	#N/A	#N/A	#N/A	3.6282e-20
FRS2	3.73535	2	0.154483	0.375608	3'UTR(M)	-0.108951	#N/A	#N/A	#N/A	#N/A	0.99721
DNAJC18	5.24606	3	0.154641	0.375608	3'UTR(F),3'UTR(M),3'UTR(L)	-0.280918	#N/A	#N/A	#N/A	#N/A	4.8219e-08
GCLM	3.73306	2	0.154659	0.375608	3'UTR(M),3'UTR(L)	-0.214064	5.02708	0.00732414	0.303553	#N/A	0.99011
TMEM50B	3.73181	2	0.154756	0.375608	3'UTR(M),3'UTR(L)	-0.00642826	#N/A	#N/A	#N/A	#N/A	0.029357
OGFRL1	5.24214	3	0.154901	0.375716	Intron,3'UTR(F),3'UTR(M)	0.20954	#N/A	#N/A	#N/A	#N/A	0.003634
HIBCH	2.02083	1	0.155155	0.376087	3'UTR(M)	-0.0710166	-0.524298	0.26516	0.676485	#N/A	2.5766e-13
MARK1	5.23153	3	0.155608	0.376941	Intron,3'UTR(F),3'UTR(M)	0.0612034	#N/A	#N/A	#N/A	#N/A	0.60045
ZNF24	2.01522	1	0.155729	0.37699	3'UTR(M),3'UTR(L)	-0.166381	#N/A	#N/A	#N/A	#N/A	0.98114
ZNF445	3.71427	2	0.156119	0.377524	3'UTR(M),3'UTR(L)	0.275954	#N/A	#N/A	#N/A	#N/A	0.9997
PARP8	2.01111	1	0.156151	0.377524	3'UTR(F),3'UTR(M)	-0.599032	#N/A	#N/A	#N/A	#N/A	0.059603
ALG2	2.00806	1	0.156465	0.37804	3'UTR(M),3'UTR(L)	-0.0856825	0.754437	0.268474	0.67785	1	8.0497e-05
TMCO4	2.00546	1	0.156734	0.378445	Intron,3'UTR(F),3'UTR(L)	0.252501	#N/A	#N/A	#N/A	#N/A	1.6674e-20
NKAIN4	2.00106	1	0.157189	0.378982	3'UTR(F),3'UTR(L)	-0.156303	#N/A	#N/A	#N/A	#N/A	0.0073144
ZNF518A	2.00066	1	0.157231	0.378982	Intron	0.0859013	#N/A	#N/A	#N/A	#N/A	#N/A
BTN3A2	1.99941	1	0.15736	0.378982	Intron,3'UTR(L)	0.148787	#N/A	#N/A	#N/A	#N/A	1.1002e-10
PVR	1.99941	1	0.157361	0.378982	3'UTR(M),3'UTR(L)	-0.0513186	3.11435	0.0628314	0.464673	#N/A	3.922e-10
VTI1B	1.99614	1	0.1577	0.379554	3'UTR(M)	-0.28475	-0.59361	0.349012	0.727179	#N/A	0.10836
BDP1	3.69251	2	0.157827	0.379617	Intron,3'UTR(F),3'UTR(M)	0.0213295	#N/A	#N/A	#N/A	#N/A	1.3294e-21
KNOP1	3.69114	2	0.157935	0.379632	3'UTR(F),3'UTR(M)	0.152259	#N/A	#N/A	#N/A	#N/A	2.3895e-07
LOC642361	1.98924	1	0.15842	0.380294	na	-0.269383	#N/A	#N/A	#N/A	#N/A	#N/A
PCSK5	1.98897	1	0.158449	0.380294	Intron	-0.186626	#N/A	#N/A	#N/A	#N/A	2.5352e-12
COL18A1	1.98786	1	0.158565	0.380294	3'UTR(F),3'UTR(M),3'UTR(L)	0.140503	0.916644	0.00354619	0.269966	#N/A	1.7414e-10
DVL3	1.98709	1	0.158645	0.380294	3'UTR(F),3'UTR(M),3'UTR(L)	-0.145515	0.579542	0.624747	0.877282	#N/A	0.38544
CENPP	1.9864	1	0.158718	0.380294	3'UTR(F),3'UTR(M)	-0.115545	#N/A	#N/A	#N/A	#N/A	0.046312
TMTC1	1.98503	1	0.158861	0.380393	3'UTR(F),3'UTR(M),3'UTR(L)	-0.155778	#N/A	#N/A	#N/A	#N/A	1.329e-09
NT5C3A	3.67591	2	0.159143	0.380678	Intron,3'UTR(F),3'UTR(M),3'UTR(L)	-0.243938	3.32719	0.112682	0.540338	#N/A	0.015053
AAED1	1.98195	1	0.159185	0.380678	3'UTR(F),3'UTR(L)	-0.346375	#N/A	#N/A	#N/A	#N/A	1.0063e-07
ERO1A	1.981	1	0.159285	0.380678	3'UTR(F),3'UTR(M)	-0.251985	0.572384	0.0794696	0.492199	#N/A	#N/A
FAHD2A	1.97425	1	0.159998	0.382138	3'UTR(F),3'UTR(M)	-0.336322	0.638995	0.17179	0.600029	#N/A	1.3522e-06
SLC36A1	1.97114	1	0.160327	0.382477	3'UTR(M),3'UTR(L)	0.0738833	#N/A	#N/A	#N/A	#N/A	1.397e-06
PPM1K	1.97	1	0.160448	0.382477	3'UTR(F),3'UTR(L)	-0.344662	#N/A	#N/A	#N/A	#N/A	0.00014736
LPGAT1	3.65835	2	0.160546	0.382477	3'UTR(M),3'UTR(L)	-0.0788423	9.82272	0.00524881	0.285325	#N/A	0.98041
DIS3	1.96905	1	0.160548	0.382477	3'UTR(M)	0.101583	0.651487	0.348108	0.727179	#N/A	1.2694e-21
U52111.1	1.96793	1	0.160667	0.382517	na	-0.725332	#N/A	#N/A	#N/A	#N/A	#N/A
LDLRAD4	1.96568	1	0.160907	0.382845	3'UTR(F),3'UTR(L)	-0.00937411	#N/A	#N/A	#N/A	#N/A	0.62011
CROT	1.96441	1	0.161042	0.382881	Intron,3'UTR(F)	-0.028031	#N/A	#N/A	#N/A	#N/A	4.4315e-25
CAST	1.96362	1	0.161127	0.382881	3'UTR(F),3'UTR(M)	-0.0940572	-0.614707	0.0511714	0.432104	#N/A	4.1218e-12
ASB6	1.96238	1	0.161259	0.382953	3'UTR(F),3'UTR(M),3'UTR(L)	-0.361977	#N/A	#N/A	#N/A	#N/A	0.00080472
JAK2	5.14402	3	0.16155	0.3834	Intron,3'UTR(F),3'UTR(M),3'UTR(L)	0.319239	#N/A	#N/A	#N/A	#N/A	0.65372
TFAM	3.64304	2	0.16178	0.383702	3'UTR(F),3'UTR(M)	-0.184825	0.20225	0.520728	0.822017	#N/A	0.17259
FBXW2	3.63549	2	0.162391	0.384908	3'UTR(F),3'UTR(M),3'UTR(L)	0.0363656	#N/A	#N/A	#N/A	#N/A	0.99877
NELFA	1.94579	1	0.163041	0.386204	3'UTR(F),3'UTR(M),3'UTR(L)	0.0831381	2.87925	0.105702	0.536325	#N/A	0.13469
SUPT3H	1.9445	1	0.163181	0.38629	Intron	-0.220115	#N/A	#N/A	#N/A	#N/A	3.2442e-11
SCRN1	1.94349	1	0.16329	0.386306	3'UTR(F),3'UTR(L)	-0.11773	0.23973	0.363583	0.728618	#N/A	0.002489
SKIL	1.94137	1	0.16352	0.386604	3'UTR(F),3'UTR(L)	-0.20514	#N/A	#N/A	#N/A	#N/A	0.98512
U2SURP	5.1124	3	0.163749	0.386889	3'UTR(M),3'UTR(L)	-0.0825986	0.00601035	0.989587	0.996121	#N/A	1
MTF1	3.61765	2	0.163847	0.386889	3'UTR(F),3'UTR(M),3'UTR(L)	0.292682	#N/A	#N/A	#N/A	#N/A	0.96897
SFPQ	1.93475	1	0.16424	0.387573	Intron	-0.119393	0.302515	0.164591	0.593668	#N/A	0.99992
TOPORS	1.93267	1	0.164466	0.387863	3'UTR(M),3'UTR(L)	0.162436	#N/A	#N/A	#N/A	#N/A	0.99904
CDV3	1.92873	1	0.164898	0.388498	Intron,3'UTR(L)	-0.166702	-0.110482	0.710268	0.90779	#N/A	0.76817
QKI	3.60431	2	0.164943	0.388498	Intron,3'UTR(M)	0.139453	-0.178192	0.714595	0.90779	#N/A	0.75121
FAM20A	1.92465	1	0.165345	0.3892	3'UTR(M),3'UTR(L)	-0.221246	#N/A	#N/A	#N/A	#N/A	2.1513e-07
ELP3	1.92094	1	0.165753	0.389845	3'UTR(F),3'UTR(L)	-0.226825	-0.804785	0.224949	0.650744	#N/A	3.0115e-14
BRD4	3.5926	2	0.165912	0.389845	Intron,3'UTR(M)	0.0372455	-0.427457	0.376558	0.732658	#N/A	1
ABCE1	1.91772	1	0.166108	0.389845	3'UTR(M)	-0.0532454	0.0608533	0.768092	0.924515	#N/A	0.9738
TPM3	5.07852	3	0.166137	0.389845	Intron,3'UTR(F),3'UTR(M)	0.0857697	-0.140808	0.427423	0.768069	#N/A	0.0066522
VEGFA	1.91744	1	0.16614	0.389845	3'UTR(M)	-0.201998	#N/A	#N/A	#N/A	#N/A	2.4085e-05
FAT3	3.58781	2	0.166309	0.389988	Intron,3'UTR(F),3'UTR(L)	-0.109846	#N/A	#N/A	#N/A	#N/A	0.99995
MCC	1.915	1	0.166409	0.389988	Intron,3'UTR(S)	-0.170444	0.304905	0.794548	0.934366	#N/A	4.6577e-16
FRA10AC1	1.91355	1	0.166569	0.390119	3'UTR(F),3'UTR(M)	0.10793	#N/A	#N/A	#N/A	#N/A	4.911e-10
ELOC	1.91131	1	0.166817	0.390457	3'UTR(M)	-0.104469	-0.026609	0.89321	0.967886	#N/A	#N/A
GOSR1	5.06465	3	0.167124	0.39075	3'UTR(M),3'UTR(L)	-0.0678962	1.3037	0.0598189	0.458889	#N/A	0.062823
NNT	1.90785	1	0.167202	0.39075	3'UTR(F),3'UTR(M)	-0.110841	0.270366	0.216004	0.641501	#N/A	0.97271
SEMA4D	1.90737	1	0.167256	0.39075	Intron	0.08226	#N/A	#N/A	#N/A	#N/A	0.97472
R3HCC1	1.90469	1	0.167555	0.391205	3'UTR(F),3'UTR(L)	-0.0698991	#N/A	#N/A	#N/A	#N/A	0.00014338
LGALS8	3.57097	2	0.167715	0.391336	3'UTR(F),3'UTR(M)	-0.0563294	#N/A	#N/A	#N/A	#N/A	3.8769e-06
DLGAP4	3.56578	2	0.168152	0.391603	3'UTR(F),3'UTR(M),3'UTR(L)	0.0680347	0.459021	0.274525	0.680113	#N/A	0.99248
NSUN3	1.89897	1	0.168194	0.391603	3'UTR(F),3'UTR(M)	0.101228	#N/A	#N/A	#N/A	#N/A	9.0405e-09
PRPF40B	1.89857	1	0.168238	0.391603	3'UTR(F),3'UTR(L)	0.178212	#N/A	#N/A	#N/A	#N/A	0.99963
CD2BP2	1.89848	1	0.168248	0.391603	3'UTR(M),3'UTR(L)	-0.132339	0.249514	0.676992	0.898099	#N/A	1.5195e-05
ECD	1.89575	1	0.168555	0.392073	3'UTR(F),3'UTR(M)	-0.0495238	#N/A	#N/A	#N/A	#N/A	2.3368e-12
CCP110	1.8928	1	0.168887	0.392473	3'UTR(M),3'UTR(L)	-0.231669	#N/A	#N/A	#N/A	#N/A	0.006676
MTMR9	1.89236	1	0.168936	0.392473	3'UTR(M),3'UTR(L)	-0.122036	1.04234	0.128145	0.563084	#N/A	0.0012631
GAS7	3.5466	2	0.169772	0.39367	3'UTR(M),3'UTR(L)	0.150571	#N/A	#N/A	#N/A	#N/A	0.8523
RCHY1	1.88453	1	0.16982	0.39367	3'UTR(M),3'UTR(L)	-0.165386	#N/A	#N/A	#N/A	#N/A	0.066203
PPP2R3C	1.88416	1	0.169862	0.39367	3'UTR(S),5UTR	-0.116055	#N/A	#N/A	#N/A	#N/A	6.818e-09
GOLGA3	1.8832	1	0.169971	0.39367	3'UTR(M),3'UTR(L)	-0.081248	0.184035	0.640681	0.885283	#N/A	0.0067951
TTC29	1.88294	1	0.17	0.39367	Intron	-0.166667	#N/A	#N/A	#N/A	#N/A	1.3375e-08
GSTM4	1.88146	1	0.170169	0.39367	Intron,3'UTR(S)	0.0837815	#N/A	#N/A	#N/A	#N/A	1.3834e-08
RNF213	3.54171	2	0.170187	0.39367	3'UTR(F),3'UTR(M)	-0.225271	-0.384558	0.818989	0.939302	#N/A	4.9078e-55
GSG1	1.87878	1	0.170473	0.393923	Intron	0.322448	#N/A	#N/A	#N/A	#N/A	0.0010401
ZNF696	1.87778	1	0.170587	0.393923	3'UTR(M)	0.385637	#N/A	#N/A	#N/A	#N/A	0.20667
HMGN2	1.87756	1	0.170612	0.393923	3'UTR(F),3'UTR(L)	0.0773884	#N/A	#N/A	#N/A	#N/A	0.86341
ACBD5	1.87649	1	0.170733	0.393959	Intron	-0.0737258	-0.83317	0.599753	0.863811	#N/A	0.006148
METTL21A	5.01264	3	0.170874	0.394041	Intron,3'UTR(S)	0.0839814	#N/A	#N/A	#N/A	#N/A	0.00050104
IFIT5	3.53194	2	0.171021	0.394137	3'UTR(F),3'UTR(M),3'UTR(L)	0.0346875	-0.223643	0.789303	0.93173	#N/A	0.00011794
SP8	1.87289	1	0.171145	0.394181	3'UTR(M),3'UTR(L)	-0.254145	#N/A	#N/A	#N/A	#N/A	0.9658
USP46	1.86943	1	0.17154	0.394848	3'UTR(M)	-0.139012	1.12144	0.378764	0.734022	#N/A	0.79135
SIX1	3.52358	2	0.171737	0.395058	3'UTR(F),3'UTR(M),3'UTR(L)	0.115127	#N/A	#N/A	#N/A	#N/A	0.65297
SRGAP2	1.86669	1	0.171855	0.39508	Intron,3'UTR(L)	-0.218423	0.788325	0.347777	0.727179	#N/A	0.97679
SUDS3	3.51993	2	0.172051	0.39508	3'UTR(M)	-0.117233	#N/A	#N/A	#N/A	#N/A	0.0045448
ARHGAP26	3.51979	2	0.172063	0.39508	Intron,3'UTR(F),3'UTR(L)	0.127049	#N/A	#N/A	#N/A	#N/A	0.99661
FAM76B	1.86307	1	0.172271	0.395315	3'UTR(M),3'UTR(L)	-0.194587	#N/A	#N/A	#N/A	#N/A	0.34062
MAP4	1.8609	1	0.172521	0.395646	3'UTR(M),3'UTR(L)	-0.136652	-0.128947	0.500584	0.809527	#N/A	0.84782
CISD3	1.85665	1	0.173012	0.396529	3'UTR(F),3'UTR(M),3'UTR(L)	0.175873	#N/A	#N/A	#N/A	#N/A	0.019823
ZNF281	1.85508	1	0.173194	0.396703	3'UTR(M),3'UTR(L)	-0.0799548	#N/A	#N/A	#N/A	#N/A	0.99624
MTDH	1.84964	1	0.173826	0.397891	3'UTR(M),3'UTR(L)	-0.0446679	0.516109	0.0957374	0.526398	#N/A	0.32924
RAB7A	1.84775	1	0.174045	0.397891	3'UTR(F),3'UTR(M)	0.0904497	0.348488	0.0753456	0.484758	#N/A	0.96933
BTRC	3.49563	2	0.174154	0.397891	3'UTR(F),3'UTR(M),3'UTR(L)	0.0443885	-1.35379	0.349058	0.727179	#N/A	0.011942
CDC42EP2	1.84666	1	0.174172	0.397891	3'UTR(F),3'UTR(M)	-0.175327	#N/A	#N/A	#N/A	#N/A	0.039267
OPN3	1.84605	1	0.174243	0.397891	Intron,3'UTR(F)	-0.148815	#N/A	#N/A	#N/A	#N/A	0.0012801
KIF1B	3.49101	2	0.174557	0.398363	Intron,3'UTR(M)	-0.0979951	0.535036	0.780978	0.929358	#N/A	1
SOX5	3.48549	2	0.175039	0.39908	Intron,3'UTR(F),3'UTR(L)	-0.238366	#N/A	#N/A	#N/A	1	0.99995
FANCF	1.83887	1	0.175084	0.39908	3'UTR(M)	-0.131498	#N/A	#N/A	#N/A	#N/A	0.45886
YWHAB	3.4788	2	0.175625	0.399809	3'UTR(F),3'UTR(M),3'UTR(L)	-0.0373894	-0.0721013	0.633358	0.881039	#N/A	0.98314
ATG12	4.94772	3	0.175666	0.399809	3'UTR(M),3'UTR(L)	-0.0176517	#N/A	#N/A	#N/A	#N/A	4.6926e-06
ENTPD4	1.83264	1	0.175816	0.399809	3'UTR(M)	-0.102349	#N/A	#N/A	#N/A	#N/A	1.8146e-16
CFAP36	1.83252	1	0.175831	0.399809	Intron,3'UTR(F)	0.0948564	1.60282	0.261053	0.674967	#N/A	#N/A
GGPS1	3.4729	2	0.176144	0.400225	Intron,3'UTR(F),CDS	-0.0597614	0.0450739	0.918955	0.977263	#N/A	0.26866
LINC00963	1.82828	1	0.176331	0.400225	na	-0.261708	#N/A	#N/A	#N/A	#N/A	#N/A
SEMA5A	3.47075	2	0.176334	0.400225	3'UTR(F),3'UTR(M),3'UTR(L)	-0.0502781	#N/A	#N/A	#N/A	#N/A	1.5403e-05
VPS37A	3.46865	2	0.176519	0.400402	Intron,3'UTR(F),3'UTR(M)	-0.167074	#N/A	#N/A	#N/A	#N/A	0.00067936
STK24	1.8215	1	0.177135	0.401555	3'UTR(M)	-0.0472871	-1.13699	0.0928074	0.525801	#N/A	0.011293
PHF19	1.81828	1	0.177519	0.402121	Intron,3'UTR(M)	0.35924	#N/A	#N/A	#N/A	#N/A	0.99946
GORAB	1.8176	1	0.177599	0.402121	3'UTR(F),3'UTR(L)	0.149611	#N/A	#N/A	#N/A	#N/A	6.6537e-06
KCTD12	1.81399	1	0.17803	0.402577	3'UTR(M)	0.0144621	-1.05881	0.000146604	0.0971145	#N/A	0.061693
TTC9C	1.81334	1	0.178108	0.402577	3'UTR(F),3'UTR(M)	-0.222293	-0.441596	0.810909	0.9372	#N/A	0.00017609
KANSL1L	3.45056	2	0.178123	0.402577	Intron,3'UTR(L)	-0.109638	#N/A	#N/A	#N/A	#N/A	0.65684
WIZ	1.81118	1	0.178367	0.402795	3'UTR(M)	-0.202371	#N/A	#N/A	#N/A	#N/A	0.99865
LRRC4C	3.44627	2	0.178506	0.402795	Intron	-0.0427283	#N/A	#N/A	#N/A	#N/A	0.97233
ZNF264	3.44586	2	0.178542	0.402795	Intron,3'UTR(M),3'UTR(L)	-0.130289	#N/A	#N/A	#N/A	#N/A	5.8267e-07
CNOT9	3.44299	2	0.178799	0.402987	Intron,3'UTR(F),3'UTR(L)	-0.00830603	-0.190898	0.804765	0.936963	#N/A	#N/A
HLA-E	1.80644	1	0.178936	0.402987	3'UTR(F),3'UTR(L)	-0.191937	#N/A	#N/A	#N/A	#N/A	0.036773
ZBTB46	3.4413	2	0.17895	0.402987	Intron,3'UTR(F),3'UTR(L)	-0.09742	#N/A	#N/A	#N/A	#N/A	0.80852
C14orf37	3.43735	2	0.179303	0.403461	Intron,3'UTR(M)	0.227419	#N/A	#N/A	#N/A	#N/A	1.7348e-07
DERL2	1.80279	1	0.179376	0.403461	3'UTR(F),3'UTR(M),3'UTR(L)	-0.11888	-2.25614	0.354405	0.727211	#N/A	0.9574
RPUSD4	1.7988	1	0.179857	0.404301	3'UTR(F),3'UTR(M)	0.16213	#N/A	#N/A	#N/A	#N/A	4.7321e-07
GPN3	1.79291	1	0.180571	0.405663	3'UTR(F),3'UTR(M),3'UTR(L)	-0.502501	#N/A	#N/A	#N/A	#N/A	2.9029e-07
CCDC14	1.79162	1	0.180729	0.405773	3'UTR(M),3'UTR(L)	-0.190426	#N/A	#N/A	#N/A	#N/A	7.7963e-15
RAD1	4.87684	3	0.181041	0.406229	CDS,3'UTR(M)	-0.273918	#N/A	#N/A	#N/A	#N/A	0.00012252
TMPO	1.7866	1	0.181341	0.406452	Intron,3'UTR(M)	-0.108093	-0.0611476	0.810662	0.9372	#N/A	1.5453e-07
PHB	1.78559	1	0.181465	0.406452	3'UTR(F),3'UTR(M),3'UTR(L)	0.0446469	0.194204	0.188376	0.620535	#N/A	0.7588
SNRNP35	1.78558	1	0.181465	0.406452	Intron,3'UTR(S)	0.544667	#N/A	#N/A	#N/A	#N/A	7.1094e-09
GPR107	1.78231	1	0.181866	0.407106	3'UTR(M),3'UTR(L)	-0.266398	0.124063	0.900754	0.970342	#N/A	0.28858
QPRT	1.7784	1	0.182346	0.407937	3'UTR(F),3'UTR(M),3'UTR(L)	-0.069394	-0.622157	0.18093	0.613121	#N/A	0.0046997
PPIL4	1.775	1	0.182764	0.408628	3'UTR(M),3'UTR(L)	-0.112222	-0.927975	0.135642	0.566632	#N/A	1.6878e-09
PCGF3	1.77243	1	0.183082	0.409094	3'UTR(F),3'UTR(M)	-0.153911	#N/A	#N/A	#N/A	#N/A	0.95326
POLI	1.77085	1	0.183278	0.409287	Intron	-0.27726	#N/A	#N/A	#N/A	#N/A	3.1764e-08
KLHL35	1.76586	1	0.183895	0.410421	Intron,3'UTR(F),3'UTR(L)	0.10406	#N/A	#N/A	#N/A	#N/A	2.3745e-15
UCHL5	1.76268	1	0.18429	0.411052	3'UTR(M),3'UTR(L)	-0.261146	-0.0988974	0.793029	0.93324	#N/A	0.0012557
RSRP1	1.76182	1	0.184397	0.411052	Intron,3'UTR(F),3'UTR(M)	-0.100177	#N/A	#N/A	#N/A	#N/A	#N/A
PRPF38B	6.19274	4	0.185209	0.412617	CDS,3'UTR(M),3'UTR(L)	-0.0657457	#N/A	#N/A	#N/A	#N/A	0.70194
OTUD4	1.75176	1	0.185655	0.413247	3'UTR(M)	-0.339929	-4.20267	0.0688594	0.478487	#N/A	0.99997
SUZ12P1	1.7513	1	0.185713	0.413247	na	-0.226713	#N/A	#N/A	#N/A	#N/A	#N/A
WIPI2	3.36477	2	0.18593	0.413484	3'UTR(F),3'UTR(M),3'UTR(L)	0.123305	#N/A	#N/A	#N/A	#N/A	0.0063887
SORL1	1.74707	1	0.186246	0.413941	3'UTR(F),3'UTR(M)	-0.11912	#N/A	#N/A	#N/A	#N/A	7.6609e-11
KHDRBS1	1.74319	1	0.186735	0.414781	Intron,3'UTR(S)	-0.0538443	-0.115396	0.718034	0.90779	#N/A	0.99423
PRKX	1.74103	1	0.187009	0.414962	Intron,3'UTR(L)	-0.203363	#N/A	#N/A	#N/A	#N/A	0.032585
AGPAT3	4.80005	3	0.187038	0.414962	3'UTR(M),3'UTR(L)	-0.0404053	0.520592	0.450458	0.781066	#N/A	0.99933
TXNDC9	3.35024	2	0.187285	0.415032	Intron,3'UTR(M),3'UTR(L)	-0.0545511	0.923655	0.184008	0.616084	#N/A	0.37701
NAA35	6.16293	4	0.187307	0.415032	3'UTR(F),3'UTR(M),3'UTR(L)	-0.0572643	-0.558796	0.498073	0.807897	#N/A	1
DNAJC8	1.73735	1	0.187475	0.415032	3'UTR(M),3'UTR(L)	0.110564	-0.0491227	0.885425	0.965074	#N/A	0.050961
ARHGEF40	1.73705	1	0.187513	0.415032	3'UTR(F),3'UTR(M)	0.0437683	-1.20502	0.425099	0.766375	#N/A	6.6277e-09
ADNP2	1.73229	1	0.188118	0.41575	CDS,3'UTR(L)	-0.115358	#N/A	#N/A	#N/A	#N/A	0.69573
OPCML	1.73219	1	0.188131	0.41575	3'UTR(F),3'UTR(L)	-0.410821	#N/A	#N/A	#N/A	#N/A	0.22804
TMEM50A	1.73189	1	0.18817	0.41575	3'UTR(F),3'UTR(M)	-0.0634507	#N/A	#N/A	#N/A	#N/A	0.16293
SMIM15	1.72629	1	0.188885	0.417084	3'UTR(M)	-0.0671081	#N/A	#N/A	#N/A	#N/A	0.15518
TTC14	1.72377	1	0.189209	0.417553	Intron,3'UTR(L)	0.248575	#N/A	#N/A	#N/A	#N/A	1.176e-09
USP31	1.72177	1	0.189465	0.417644	3'UTR(F),3'UTR(M)	-0.320008	#N/A	#N/A	#N/A	#N/A	0.062141
RNF14	3.32701	2	0.189473	0.417644	3'UTR(F),3'UTR(M)	0.0031564	#N/A	#N/A	#N/A	#N/A	0.0011129
PCDHB5	1.71965	1	0.189738	0.41777	3'UTR(F),3'UTR(L)	0.0335258	#N/A	#N/A	#N/A	#N/A	2.4736e-06
TRIM22	1.71953	1	0.189753	0.41777	3'UTR(F),CDS	-0.0917371	#N/A	#N/A	#N/A	#N/A	2.1312e-05
RRAGD	1.71385	1	0.190487	0.419139	3'UTR(F),3'UTR(M),3'UTR(L)	-0.0931264	#N/A	#N/A	#N/A	#N/A	0.81991
PIGN	3.31145	2	0.190953	0.419918	Intron,3'UTR(F),3'UTR(M)	-0.119569	#N/A	#N/A	#N/A	1	2.29e-21
ERBIN	1.70929	1	0.191077	0.419943	3'UTR(M)	-0.175415	0.287175	0.866674	0.955696	#N/A	#N/A
NOL12	1.70547	1	0.191575	0.42079	3'UTR(F),3'UTR(L)	-0.171266	#N/A	#N/A	#N/A	#N/A	0.0012204
SLC9A9	1.704	1	0.191766	0.420964	Intron,3'UTR(S)	0.0461887	#N/A	#N/A	#N/A	#N/A	5.3311e-12
DCAF8	1.69935	1	0.192373	0.422049	3'UTR(M),3'UTR(L)	-0.185889	3.49337	0.0465651	0.418834	#N/A	0.9996
ASB7	1.69678	1	0.19271	0.422541	Intron,3'UTR(L)	0.0261393	#N/A	#N/A	#N/A	#N/A	0.98395
CDK12	4.72307	3	0.193236	0.423262	3'UTR(M)	-0.0216073	#N/A	#N/A	#N/A	#N/A	1
UBE2D3	3.28683	2	0.193319	0.423262	3'UTR(M)	-0.0345481	0.969839	0.000452203	0.157296	#N/A	0.41278
BTG1	1.69169	1	0.193378	0.423262	3'UTR(F),3'UTR(L)	0.0942705	#N/A	#N/A	#N/A	#N/A	0.53641
ACER3	4.71723	3	0.193713	0.423748	3'UTR(F),3'UTR(M),3'UTR(L)	-0.306422	#N/A	#N/A	#N/A	#N/A	0.87464
ORC2	1.68626	1	0.194095	0.424158	3'UTR(M),3'UTR(L)	-0.186016	#N/A	#N/A	#N/A	#N/A	0.84443
MTMR3	3.27848	2	0.194127	0.424158	3'UTR(M)	0.0290769	#N/A	#N/A	#N/A	#N/A	0.99937
IQSEC1	3.27439	2	0.194525	0.424656	Intron,3'UTR(F),3'UTR(L)	0.0583753	-1.07359	0.506761	0.812526	#N/A	0.99969
RAB3GAP2	1.68258	1	0.194582	0.424656	3'UTR(F),3'UTR(L)	-0.243658	0.123307	0.759421	0.918958	1	0.98674
ELOVL6	1.67863	1	0.195107	0.425356	3'UTR(M),3'UTR(L)	-0.112001	#N/A	#N/A	#N/A	#N/A	0.96581
SCARB2	3.26818	2	0.19513	0.425356	3'UTR(M),3'UTR(L)	-0.143471	-0.47613	0.054098	0.44127	#N/A	8.9495e-05
GLIS3	4.6972	3	0.195361	0.425611	Intron,3'UTR(F),3'UTR(M),3'UTR(L)	-0.00227404	#N/A	#N/A	#N/A	#N/A	5.5977e-08
PEX19	3.25795	2	0.19613	0.427039	3'UTR(M)	-0.0933962	0.274197	0.590463	0.858856	1	0.0003188
LRRC28	1.66743	1	0.196603	0.42782	3'UTR(F),3'UTR(M)	0.0112768	#N/A	#N/A	#N/A	#N/A	2.0078e-11
PC	1.66607	1	0.196786	0.42797	Intron,3'UTR(F)	0.232458	-0.100514	0.761325	0.919886	1	0.013834
STX12	1.66252	1	0.197263	0.428637	3'UTR(M)	0.140292	0.844886	0.0123077	0.323029	#N/A	0.95624
USP3	1.66209	1	0.197322	0.428637	3'UTR(F),3'UTR(M)	0.0664134	#N/A	#N/A	#N/A	#N/A	0.99989
MFSD8	1.65845	1	0.197813	0.429455	3'UTR(F),3'UTR(L)	-0.163457	#N/A	#N/A	#N/A	#N/A	2.5375e-12
ZNF33A	1.65654	1	0.198071	0.429565	Intron	-0.35027	#N/A	#N/A	#N/A	#N/A	1.9718e-09
USP47	4.66432	3	0.198093	0.429565	CDS,3'UTR(M),3'UTR(L)	-0.0783572	0.380347	0.381963	0.737887	#N/A	1
GTF2H1	1.65392	1	0.198426	0.430003	3'UTR(F),3'UTR(M)	-0.0744269	#N/A	#N/A	#N/A	#N/A	0.98982
SMAP1	1.65319	1	0.198525	0.430003	CDS,3'UTR(M)	0.0963298	1.00142	0.025531	0.35698	#N/A	0.99357
ZCCHC7	1.65219	1	0.198661	0.43005	3'UTR(F),3'UTR(L)	0.137643	#N/A	#N/A	#N/A	#N/A	3.8612e-09
GOLGA4	1.65133	1	0.198778	0.430055	Intron,3'UTR(M),3'UTR(L)	0.196	-2.62105	0.0386786	0.399089	#N/A	9.481e-16
NFATC1	1.64879	1	0.199124	0.430474	Intron,3'UTR(S)	-0.112442	#N/A	#N/A	#N/A	1	0.15652
HDGFRP3	3.2265	2	0.199239	0.430474	Intron,3'UTR(M)	0.0201069	#N/A	#N/A	#N/A	#N/A	0.9738
ASIC2	1.64737	1	0.199317	0.430474	Intron,3'UTR(S)	0.360204	#N/A	#N/A	#N/A	#N/A	0.99912
ZMYM2	1.64533	1	0.199596	0.43061	3'UTR(F),3'UTR(M)	-0.121772	#N/A	#N/A	#N/A	#N/A	0.66648
SMIM14	1.64419	1	0.199751	0.43061	3'UTR(M)	-0.211774	#N/A	#N/A	#N/A	#N/A	0.79188
CTSB	1.64262	1	0.199966	0.43061	3'UTR(M),3'UTR(L)	-0.0700248	0.660625	0.00195358	0.221642	#N/A	5.8819e-11
SRSF6	1.64255	1	0.199976	0.43061	3'UTR(F),3'UTR(M)	-0.110767	0.191774	0.32131	0.71294	#N/A	0.91099
NHSL1	1.64241	1	0.199995	0.43061	3'UTR(F),3'UTR(L)	-0.113728	#N/A	#N/A	#N/A	#N/A	0.46052
PTX3	1.64186	1	0.20007	0.43061	3'UTR(F),3'UTR(M)	-0.0475599	#N/A	#N/A	#N/A	#N/A	6.9827e-05
ZNF576	1.64006	1	0.200317	0.430894	3'UTR(F),3'UTR(M)	-0.358329	#N/A	#N/A	#N/A	#N/A	0.0016326
SMIM13	1.63831	1	0.200557	0.431107	3'UTR(M),3'UTR(L)	0.0882042	#N/A	#N/A	#N/A	#N/A	0.19183
NIP7	3.21158	2	0.200731	0.431107	3'UTR(F),3'UTR(M)	0.144922	#N/A	#N/A	#N/A	#N/A	0.36417
CFH	1.63683	1	0.200761	0.431107	Intron,3'UTR(F)	-0.0259847	#N/A	#N/A	#N/A	#N/A	0.86061
COX11	3.209	2	0.20099	0.431351	Intron,3'UTR(S)	0.115243	#N/A	#N/A	#N/A	#N/A	0.016088
AMIGO2	1.63348	1	0.201222	0.431602	3'UTR(F),3'UTR(M),3'UTR(L)	-0.489069	#N/A	#N/A	#N/A	#N/A	0.59743
JMJD8	1.63128	1	0.201526	0.431891	3'UTR(F),3'UTR(L)	-0.207051	#N/A	#N/A	#N/A	#N/A	6.0633e-14
LPP	1.63003	1	0.201699	0.431891	3'UTR(F),3'UTR(L)	-0.0730641	0.218911	0.51749	0.819579	#N/A	0.0071908
UHRF1BP1L	1.63	1	0.201703	0.431891	3'UTR(M),3'UTR(L)	-0.534475	#N/A	#N/A	#N/A	#N/A	0.0042502
ANKRD17	4.60802	3	0.202856	0.434111	Intron,3'UTR(M),3'UTR(L)	0.120171	1.08686	0.168807	0.596996	#N/A	1
SNAP29	1.61974	1	0.203128	0.434445	3'UTR(F),3'UTR(M),3'UTR(L)	-0.0178788	-0.554911	0.323619	0.71399	1	0.013567
WARS	1.61748	1	0.203443	0.434871	3'UTR(M),3'UTR(L)	-0.0842136	-0.0846506	0.623207	0.876106	#N/A	0.30288
CDK1	1.61497	1	0.203794	0.434955	3'UTR(F),3'UTR(M)	0.309698	-0.808573	0.452171	0.782406	#N/A	0.99206
RBL2	3.18121	2	0.203802	0.434955	3'UTR(F),3'UTR(M),3'UTR(L)	0.0215351	#N/A	#N/A	#N/A	#N/A	0.99835
DPPA4	1.61471	1	0.203831	0.434955	3'UTR(M)	-0.282366	#N/A	#N/A	#N/A	#N/A	0.00029363
DNAJC5	4.59244	3	0.204192	0.435477	3'UTR(F),3'UTR(M),3'UTR(L)	-0.0725409	3.50997	0.00101166	0.188576	#N/A	0.81216
SLMAP	1.61075	1	0.204386	0.435644	3'UTR(F),3'UTR(M)	-0.160635	1.15744	0.183885	0.616084	#N/A	0.99976
TLE4	1.60936	1	0.204581	0.435812	3'UTR(F),3'UTR(M)	-0.139825	#N/A	#N/A	#N/A	#N/A	0.99999
ZC3H10	1.60824	1	0.204739	0.435901	3'UTR(F),3'UTR(M)	-0.646761	#N/A	#N/A	#N/A	#N/A	0.31615
MTRF1L	1.60737	1	0.204862	0.435913	CDS,3'UTR(M)	-0.689041	#N/A	#N/A	#N/A	#N/A	2.9554e-10
DEPDC1	1.60627	1	0.205017	0.435995	3'UTR(M),3'UTR(L)	-0.43287	#N/A	#N/A	#N/A	#N/A	7.635e-10
PRKAR2A	1.60073	1	0.2058	0.437182	3'UTR(F),3'UTR(L)	0.142631	-0.175338	0.789597	0.93173	#N/A	0.11865
RUNX1	3.16162	2	0.205808	0.437182	3'UTR(M),3'UTR(L)	-0.158534	0.0231205	0.981073	0.99443	#N/A	0.65377
STRN	1.59762	1	0.20624	0.437852	3'UTR(M)	0.190324	-0.670754	0.385004	0.739208	#N/A	0.66061
HDAC5	1.594	1	0.206755	0.438696	3'UTR(F),3'UTR(L)	0.0604762	#N/A	#N/A	#N/A	#N/A	1
DNAJA1	1.59192	1	0.207053	0.439078	3'UTR(F),3'UTR(M)	-0.162408	1.10024	0.0673984	0.475888	#N/A	0.090813
ARHGEF26	1.58974	1	0.207364	0.439275	3'UTR(F),3'UTR(L)	0.185792	#N/A	#N/A	#N/A	#N/A	1.8567e-14
SACM1L	1.58827	1	0.207573	0.439275	3'UTR(F),3'UTR(M)	-0.211717	0.563739	0.260884	0.674967	#N/A	0.69536
C14orf28	1.58741	1	0.207696	0.439275	CDS,3'UTR(L)	-0.220886	#N/A	#N/A	#N/A	#N/A	2.2179e-10
SUFU	1.58736	1	0.207704	0.439275	Intron,3'UTR(L)	-0.143136	#N/A	#N/A	#N/A	#N/A	0.99992
CHM	1.58716	1	0.207732	0.439275	Intron,3'UTR(L)	-0.260288	#N/A	#N/A	#N/A	#N/A	0.99899
SENP1	3.14086	2	0.207955	0.439499	3'UTR(M)	-0.21175	#N/A	#N/A	#N/A	#N/A	0.99358
RILPL1	1.58435	1	0.208135	0.439574	Intron,3'UTR(F)	0.26287	-0.022843	0.965959	0.991172	#N/A	0.38572
RBBP4	1.58372	1	0.208225	0.439574	3'UTR(M)	-0.0705538	0.0115628	0.960466	0.98972	#N/A	0.99565
MAMSTR	1.58215	1	0.208452	0.439804	3'UTR(F),3'UTR(L)	-0.239077	#N/A	#N/A	#N/A	#N/A	0.0054856
UTP11	1.57705	1	0.209186	0.440984	3'UTR(F),CDS,3'UTR(L)	-0.125225	#N/A	#N/A	#N/A	#N/A	#N/A
JMJD6	1.57663	1	0.209246	0.440984	Intron,3'UTR(L)	0.170815	0.848944	0.411679	0.756665	#N/A	0.93353
EXTL3	1.56969	1	0.210251	0.442852	Intron,3'UTR(S)	0.0214306	#N/A	#N/A	#N/A	#N/A	2.5023e-05
C14orf119	1.5628	1	0.211255	0.444717	3'UTR(F),3'UTR(L)	-0.0373191	#N/A	#N/A	#N/A	#N/A	0.0062891
PAX6	1.56179	1	0.211403	0.444777	3'UTR(M)	0.167054	#N/A	#N/A	#N/A	1	0.99975
SERPINB9	3.10533	2	0.211683	0.445116	Intron,3'UTR(M)	-0.0677063	-0.24167	0.504607	0.812319	#N/A	0.012327
TRIM9	1.55558	1	0.212313	0.446137	Intron,3'UTR(S)	0.315329	1.05434	0.231192	0.656111	#N/A	0.99973
ZCCHC10	3.09851	2	0.212406	0.446137	Intron,3'UTR(F),3'UTR(L)	-0.133801	#N/A	#N/A	#N/A	#N/A	0.059669
FGFR1OP	1.5522	1	0.212811	0.446736	3'UTR(F),3'UTR(M)	-0.335201	2.84118	0.0718729	0.484009	#N/A	0.00062816
UBE2L3	4.49202	3	0.213004	0.44675	3'UTR(F),3'UTR(M),3'UTR(L)	-0.0142542	0.00419146	0.977985	0.993749	#N/A	0.83844
DEC1	1.55054	1	0.213056	0.44675	Intron	0.0542387	#N/A	#N/A	#N/A	#N/A	2.6727e-05
EIF4E3	3.08848	2	0.213474	0.447375	3'UTR(F),3'UTR(M),3'UTR(L)	-0.0659569	#N/A	#N/A	#N/A	#N/A	0.018058
ZFP14	1.54593	1	0.213737	0.447676	3'UTR(M),3'UTR(L)	-0.602536	#N/A	#N/A	#N/A	#N/A	0.0002154
C1orf52	1.54431	1	0.213977	0.44781	3'UTR(M)	0.0717586	#N/A	#N/A	#N/A	#N/A	0.047382
NRAS	1.54335	1	0.21412	0.44781	3'UTR(M),3'UTR(L)	-0.00378318	0.117718	0.672666	0.898099	1	0.49009
ESYT2	1.54262	1	0.214228	0.44781	3'UTR(M),3'UTR(L)	-0.124688	0.413767	0.523127	0.822017	#N/A	7.7928e-06
SMC6	3.08095	2	0.214279	0.44781	3'UTR(F),3'UTR(M),3'UTR(L)	-0.0450729	#N/A	#N/A	#N/A	#N/A	2.659e-06
MKI67	3.07452	2	0.21497	0.448799	3'UTR(M)	-0.142606	#N/A	#N/A	#N/A	#N/A	1.2598e-28
SORBS3	1.53701	1	0.215064	0.448799	Intron,3'UTR(S)	0.183382	-0.302074	0.612003	0.871529	#N/A	8.2277e-12
FAM32A	1.53669	1	0.215112	0.448799	3'UTR(F),3'UTR(L)	-0.144146	#N/A	#N/A	#N/A	#N/A	0.030275
EIF3A	3.07181	2	0.215261	0.44886	3'UTR(F),3'UTR(M),3'UTR(L)	0.00827855	-0.0908343	0.712704	0.90779	#N/A	1
NUFIP1	1.53374	1	0.215552	0.449217	3'UTR(F),3'UTR(L)	-0.373863	#N/A	#N/A	#N/A	#N/A	6.2929e-08
ERP44	4.46065	3	0.215827	0.44942	3'UTR(M),3'UTR(L)	0.0113811	0.339696	0.0687278	0.478487	#N/A	0.99106
VTI1A	3.06597	2	0.21589	0.44942	3'UTR(F),3'UTR(M)	-0.0652409	-0.161811	0.827619	0.941396	#N/A	0.00054173
SORCS2	1.52978	1	0.216146	0.449703	Intron,3'UTR(S)	-0.146974	-0.229992	0.822615	0.939827	#N/A	0.0031696
PQBP1	1.52876	1	0.216298	0.449771	3'UTR(F),3'UTR(L)	0.136025	-0.503841	0.420226	0.761717	1	0.78935
SETBP1	1.52703	1	0.216558	0.449936	Intron,3'UTR(L)	-0.236224	#N/A	#N/A	#N/A	1	1
ZC2HC1A	1.52664	1	0.216618	0.449936	3'UTR(F),3'UTR(L)	-0.0723338	0.800871	0.0322641	0.381866	#N/A	0.30952
GATAD2B	3.05137	2	0.217472	0.451283	3'UTR(M),3'UTR(L)	-0.159955	0.243624	0.650379	0.888531	1	0.99998
EEFSEC	1.52074	1	0.217507	0.451283	Intron,3'UTR(F)	-0.0954665	-0.461273	0.467014	0.790254	#N/A	2.6975e-08
NKAIN1	3.04854	2	0.21778	0.451478	3'UTR(F),3'UTR(M),3'UTR(L)	-0.0941636	#N/A	#N/A	#N/A	#N/A	0.24678
NSD1	1.51853	1	0.217843	0.451478	3'UTR(F),3'UTR(L)	-0.166175	#N/A	#N/A	#N/A	1	1
ATXN1	3.04359	2	0.21832	0.45211	Intron,3'UTR(M),3'UTR(L)	0.00983715	#N/A	#N/A	#N/A	#N/A	0.97498
UBE2G1	1.51432	1	0.218481	0.45211	3'UTR(M),3'UTR(L)	-0.137412	0.127059	0.807248	0.936963	#N/A	0.84382
FNBP1L	1.51413	1	0.21851	0.45211	Intron,3'UTR(M)	0.164667	0.119304	0.773074	0.927466	#N/A	0.75392
ASNSD1	3.03989	2	0.218724	0.452304	3'UTR(F),CDS,3'UTR(M),3'UTR(L)	-0.0613656	#N/A	#N/A	#N/A	#N/A	9.2537e-17
WDR43	1.51046	1	0.219069	0.452768	3'UTR(F),3'UTR(M)	0.165927	-0.35019	0.754	0.918958	#N/A	0.99997
EML1	1.50915	1	0.219269	0.452931	3'UTR(M),3'UTR(L)	-0.10607	-0.48094	0.358186	0.727965	#N/A	0.99608
PRMT2	3.033	2	0.219478	0.453112	Intron,3'UTR(F),3'UTR(M)	-0.0741248	-0.303484	0.552736	0.836899	#N/A	0.0016132
CDS2	4.41831	3	0.219694	0.453302	3'UTR(F),3'UTR(M),3'UTR(L)	0.00304688	0.274469	0.521294	0.822017	#N/A	6.8645e-07
KIAA1549	3.02997	2	0.219812	0.453302	3'UTR(F),3'UTR(M),3'UTR(L)	0.0136586	#N/A	#N/A	#N/A	#N/A	0.98607
SNX11	1.49758	1	0.221045	0.455593	3'UTR(F),3'UTR(M)	0.00579014	#N/A	#N/A	#N/A	#N/A	7.3043e-07
AP5Z1	1.49624	1	0.221251	0.455768	3'UTR(F),3'UTR(L)	-0.0624893	1.07973	0.535207	0.825937	#N/A	7.2894e-31
FAM122B	1.49304	1	0.221746	0.456135	3'UTR(F),3'UTR(L)	-0.0553828	#N/A	#N/A	#N/A	#N/A	0.83835
FAM114A1	1.49232	1	0.221857	0.456135	3'UTR(F),3'UTR(L)	0.0310373	-0.300838	0.321126	0.71294	#N/A	1.4659e-20
CUL2	1.49226	1	0.221866	0.456135	3'UTR(M),3'UTR(L)	0.155077	0.0745639	0.857865	0.951656	#N/A	1
EYA4	1.49193	1	0.221917	0.456135	3'UTR(F),3'UTR(L)	0.301762	#N/A	#N/A	#N/A	#N/A	0.04872
IMPAD1	4.39258	3	0.222074	0.456208	3'UTR(M),3'UTR(L)	-0.128702	4.52865	0.179654	0.611755	#N/A	0.015288
CTDSPL2	1.4894	1	0.22231	0.456228	3'UTR(M)	-0.146512	-1.97863	0.198844	0.629604	#N/A	0.99966
ANKFY1	1.48928	1	0.222327	0.456228	3'UTR(M),3'UTR(L)	-0.221084	-0.338718	0.36182	0.728618	#N/A	0.95629
SNTB1	3.00092	2	0.223027	0.457414	3'UTR(M)	0.0714885	-1.6522	0.0871402	0.511708	#N/A	0.0010263
ARHGAP12	1.48219	1	0.223432	0.457994	3'UTR(M),3'UTR(L)	0.418818	#N/A	#N/A	#N/A	#N/A	5.513e-07
PODNL1	1.47666	1	0.224297	0.459515	3'UTR(F),3'UTR(L)	-0.142449	#N/A	#N/A	#N/A	#N/A	4.4042e-13
RTF1	1.47529	1	0.224513	0.459706	3'UTR(M)	-0.198697	-0.175249	0.761986	0.920192	#N/A	1
EIF3K	1.47419	1	0.224686	0.459808	3'UTR(S),CDS	0.106389	0.632002	0.294064	0.694242	#N/A	0.0021017
SEC62	4.35938	3	0.225182	0.460571	3'UTR(F),3'UTR(M),3'UTR(L)	0.0352172	0.717444	0.0351561	0.386655	#N/A	0.98295
DNAJB9	1.46954	1	0.225418	0.460803	3'UTR(M),3'UTR(L)	0.147229	#N/A	#N/A	#N/A	#N/A	0.36507
TNFRSF19	1.46846	1	0.225589	0.460901	3'UTR(F),3'UTR(L)	0.0235654	#N/A	#N/A	#N/A	#N/A	0.032926
SFSWAP	1.46703	1	0.225814	0.461096	3'UTR(S),CDS	-0.273843	#N/A	#N/A	#N/A	#N/A	0.99999
KAT14	2.97505	2	0.225931	0.461096	Intron,3'UTR(F),3'UTR(M),3'UTR(L)	-0.0130037	#N/A	#N/A	#N/A	#N/A	#N/A
ANKRD10	1.4638	1	0.226326	0.461448	Intron,3'UTR(L)	0.176454	#N/A	#N/A	#N/A	#N/A	0.1645
DNAJC3	2.97135	2	0.22635	0.461448	3'UTR(F),3'UTR(M),3'UTR(L)	-0.0353585	0.286555	0.713321	0.90779	#N/A	0.017493
TBC1D8B	1.46031	1	0.226881	0.462111	Intron,3'UTR(M),3'UTR(L)	-0.561453	2.1703	0.00322291	0.267282	#N/A	5.953e-09
PGP	1.46005	1	0.226922	0.462111	3'UTR(F),3'UTR(L)	0.106868	-0.60808	0.418937	0.761219	#N/A	0.16263
IQCG	1.45585	1	0.227592	0.463067	Intron,3'UTR(F)	-0.235986	#N/A	#N/A	#N/A	#N/A	3.022e-21
PTPRE	1.45556	1	0.227638	0.463067	Intron,3'UTR(S)	0.0903429	#N/A	#N/A	#N/A	#N/A	0.00081616
CIT	1.45241	1	0.228142	0.463697	3'UTR(F),3'UTR(L)	-0.112165	#N/A	#N/A	#N/A	#N/A	0.9997
MRPL47	1.45207	1	0.228196	0.463697	3'UTR(F),3'UTR(M)	-0.0849605	-1.67428	0.25389	0.668821	#N/A	0.00042814
NRF1	1.45066	1	0.228423	0.463717	3'UTR(F),3'UTR(M)	-0.562975	#N/A	#N/A	#N/A	#N/A	0.99922
ALG1	1.45016	1	0.228502	0.463717	3'UTR(F),3'UTR(M)	0.0913875	0.120787	0.905885	0.972929	1	3.622e-19
POGZ	1.44969	1	0.228577	0.463717	3'UTR(F),3'UTR(M),3'UTR(L)	0.065535	0.391855	0.665365	0.894551	1	1
MYO9B	1.44595	1	0.229179	0.464456	3'UTR(F),3'UTR(M),3'UTR(L)	0.143555	0.469909	0.591948	0.859301	#N/A	1
DOCK1	2.94641	2	0.229189	0.464456	Intron,3'UTR(L)	-0.0805952	-0.369609	0.65805	0.892659	#N/A	0.0068117
DYNC1LI2	1.44441	1	0.229426	0.46457	3'UTR(F),3'UTR(M),3'UTR(L)	0.115946	0.688855	0.0112253	0.315561	#N/A	0.98346
FLT1	1.444	1	0.229494	0.46457	Intron,3'UTR(L)	-0.421592	#N/A	#N/A	#N/A	#N/A	0.99983
TBC1D2B	1.4408	1	0.23001	0.465364	3'UTR(M),3'UTR(L)	-0.0239625	-0.592673	0.62034	0.874785	#N/A	1.438e-08
VPS41	1.43127	1	0.231558	0.468242	3'UTR(M)	-0.147714	-0.083924	0.943685	0.985124	#N/A	4.4224e-18
SH3D19	1.42977	1	0.231802	0.468483	3'UTR(M),3'UTR(L)	-0.10304	#N/A	#N/A	#N/A	#N/A	5.5622e-06
DCAF10	1.42648	1	0.23234	0.469257	3'UTR(M),3'UTR(L)	0.206805	#N/A	#N/A	#N/A	#N/A	0.80377
MED21	1.42477	1	0.23262	0.469257	3'UTR(F),3'UTR(M)	-0.0330723	#N/A	#N/A	#N/A	#N/A	0.014255
RWDD2A	1.42453	1	0.232659	0.469257	3'UTR(F),3'UTR(L)	0.386185	#N/A	#N/A	#N/A	#N/A	3.7145e-07
PIK3CA	1.42416	1	0.23272	0.469257	3'UTR(F),3'UTR(M),3'UTR(L)	-0.0899666	#N/A	#N/A	#N/A	#N/A	1
THAP5	1.42357	1	0.232816	0.469257	3'UTR(M)	-0.0500803	#N/A	#N/A	#N/A	#N/A	8.6157e-06
MRPL52	1.42284	1	0.232937	0.469257	3'UTR(F),3'UTR(L)	-0.021695	#N/A	#N/A	#N/A	#N/A	2.1598e-07
FNBP1	2.91189	2	0.23318	0.469386	Intron,3'UTR(F),3'UTR(L)	0.0531167	#N/A	#N/A	#N/A	#N/A	0.82844
UBIAD1	1.42092	1	0.233252	0.469386	Intron	-0.390309	#N/A	#N/A	#N/A	#N/A	0.019529
POGK	1.42008	1	0.23339	0.469412	Intron,3'UTR(M)	-0.208189	#N/A	#N/A	#N/A	#N/A	0.89187
RPS6KA3	1.41763	1	0.233795	0.469974	3'UTR(M),3'UTR(L)	-0.220096	0.212915	0.634844	0.882032	1	0.99999
CHIC2	1.41627	1	0.234018	0.47017	3'UTR(M)	-0.0290084	#N/A	#N/A	#N/A	#N/A	0.54245
TRMT2A	1.40951	1	0.235138	0.472168	3'UTR(F),3'UTR(L)	0.164473	#N/A	#N/A	#N/A	#N/A	1.0841e-08
ASB1	1.40719	1	0.235524	0.472272	3'UTR(F),3'UTR(L)	-0.110345	#N/A	#N/A	#N/A	#N/A	0.0029925
CAPN7	1.40704	1	0.235548	0.472272	3'UTR(M),3'UTR(L)	-0.103308	#N/A	#N/A	#N/A	#N/A	1.2865e-13
TACC1	2.89047	2	0.23569	0.472272	3'UTR(F),3'UTR(M)	-0.0209453	-0.332335	0.647979	0.886904	#N/A	5.4901e-05
MELK	1.40616	1	0.235695	0.472272	3'UTR(F),3'UTR(M)	-0.299538	#N/A	#N/A	#N/A	#N/A	4.5055e-22
KMT5B	2.88873	2	0.235895	0.472293	Intron,3'UTR(M),3'UTR(L)	-0.0314842	#N/A	#N/A	#N/A	#N/A	#N/A
WDR76	1.40425	1	0.236014	0.472293	3'UTR(M)	-0.0848366	#N/A	#N/A	#N/A	#N/A	2.7667e-09
SAP30BP	1.40383	1	0.236083	0.472293	3'UTR(F),3'UTR(M),3'UTR(L)	-0.0678262	#N/A	#N/A	#N/A	#N/A	0.00011365
ATF1	1.39779	1	0.237093	0.473685	3'UTR(M),3'UTR(L)	-0.086625	#N/A	#N/A	#N/A	#N/A	0.63426
MCAM	1.39754	1	0.237136	0.473685	3'UTR(F),3'UTR(M)	0.108525	-0.654746	0.0844686	0.503752	#N/A	0.00015954
PCDHB15	1.39741	1	0.237158	0.473685	3'UTR(F),3'UTR(M)	0.635805	#N/A	#N/A	#N/A	#N/A	9.7376e-12
NFASC	2.87579	2	0.237427	0.473968	Intron,3'UTR(M),3'UTR(L)	0.127727	#N/A	#N/A	#N/A	#N/A	0.99999
TAF1C	1.39448	1	0.23765	0.473991	3'UTR(M)	0.0722075	#N/A	#N/A	#N/A	#N/A	1.4604e-24
SART3	1.39423	1	0.237691	0.473991	3'UTR(M)	-0.116124	-0.192763	0.54348	0.832516	#N/A	0.99661
GNL1	1.38897	1	0.23858	0.474802	3'UTR(F),3'UTR(M),3'UTR(L)	-0.0939459	0.424687	0.34071	0.726208	#N/A	0.99928
UTP4	1.38851	1	0.238656	0.474802	Intron,3'UTR(S)	0.0954259	#N/A	#N/A	#N/A	#N/A	#N/A
SRPK1	1.38826	1	0.2387	0.474802	3'UTR(M),3'UTR(L)	-0.106475	0.877152	0.495833	0.806358	#N/A	1.91e-05
PRKD1	1.38735	1	0.238853	0.474802	3'UTR(F),3'UTR(L)	-0.177653	#N/A	#N/A	#N/A	#N/A	6.6485e-07
PDCD11	1.38698	1	0.238915	0.474802	3'UTR(F),3'UTR(M)	0.0992385	0.190826	0.872441	0.959301	#N/A	3.2929e-16
MFN1	2.863	2	0.23895	0.474802	3'UTR(F),3'UTR(M),3'UTR(L)	-0.0723273	-3.60919	0.0969071	0.526398	#N/A	2.5118e-10
TRAPPC9	1.3863	1	0.239032	0.474802	3'UTR(F),3'UTR(L)	0.200969	#N/A	#N/A	#N/A	1	2.2898e-14
KCNMA1	4.21552	3	0.239112	0.474802	Intron,3'UTR(S)	-0.00244889	#N/A	#N/A	#N/A	#N/A	0.99731
KIF18A	1.38335	1	0.239531	0.475205	3'UTR(F),3'UTR(M),3'UTR(L)	-0.0635684	#N/A	#N/A	#N/A	#N/A	0.0014835
YPEL5	1.38313	1	0.239569	0.475205	3'UTR(M)	0.0806371	#N/A	#N/A	#N/A	#N/A	0.46474
F10	1.37938	1	0.240207	0.475832	Intron,3'UTR(S)	-0.405688	#N/A	#N/A	#N/A	#N/A	2.3473e-06
PSPH	1.37905	1	0.240263	0.475832	3'UTR(M)	-0.0405701	-0.220846	0.232248	0.65613	#N/A	0.00096703
IVD	4.20395	3	0.240267	0.475832	Intron,3'UTR(S)	-0.186015	0.00113682	0.996145	0.998546	#N/A	1.5329e-14
TCTA	1.37737	1	0.24055	0.476141	3'UTR(F),3'UTR(M)	-0.230025	#N/A	#N/A	#N/A	#N/A	0.00046337
GCA	2.84351	2	0.24129	0.477271	3'UTR(M),3'UTR(L)	0.426146	0.102012	0.884268	0.964904	#N/A	0.00013787
DUSP28	1.37254	1	0.241375	0.477271	Intron,3'UTR(F)	-0.317243	#N/A	#N/A	#N/A	#N/A	0.17995
BAG5	1.36785	1	0.242181	0.478518	3'UTR(M),3'UTR(L)	-0.015977	-0.156099	0.777675	0.928663	#N/A	1.81e-06
DST	2.83388	2	0.242455	0.478518	Intron,3'UTR(M),3'UTR(L)	-0.0826062	-0.106801	0.886457	0.965623	1	1
TRAM1	1.36619	1	0.242468	0.478518	3'UTR(M),3'UTR(L)	-0.0559732	0.318026	0.527585	0.822017	#N/A	0.92506
TMEM19	1.3659	1	0.242517	0.478518	3'UTR(M)	-0.149481	#N/A	#N/A	#N/A	#N/A	0.0052014
IQSEC2	1.36492	1	0.242686	0.478599	Intron,3'UTR(L)	-0.176743	#N/A	#N/A	#N/A	1	0.99998
HSDL1	1.36299	1	0.24302	0.479005	3'UTR(M),3'UTR(L)	0.0662887	0.847053	0.0487888	0.426539	#N/A	0.0034111
SMARCAD1	1.36208	1	0.243177	0.479062	3'UTR(M),3'UTR(L)	-0.19971	#N/A	#N/A	#N/A	#N/A	1
DENND1B	2.82662	2	0.243337	0.479126	Intron	0.54103	#N/A	#N/A	#N/A	#N/A	0.20408
IP6K2	2.82471	2	0.243569	0.479331	Intron,3'UTR(S)	0.0685626	#N/A	#N/A	#N/A	#N/A	0.973
NR2C1	1.35638	1	0.244167	0.479515	3'UTR(M),3'UTR(L)	-0.137579	#N/A	#N/A	#N/A	#N/A	0.68284
GZF1	1.35629	1	0.244182	0.479515	3'UTR(M)	0.0848222	#N/A	#N/A	#N/A	#N/A	0.0017798
SAMD8	1.35615	1	0.244205	0.479515	3'UTR(F),3'UTR(M)	-0.00652852	#N/A	#N/A	#N/A	#N/A	0.0017634
DCUN1D1	5.44898	4	0.244251	0.479515	3'UTR(M)	-0.311744	-0.788851	0.382247	0.737887	#N/A	0.98526
SORBS2	1.35559	1	0.244303	0.479515	3'UTR(F),3'UTR(L)	0.015773	-0.301436	0.28402	0.686933	#N/A	0.035916
SRSF11	1.35155	1	0.245008	0.480646	3'UTR(M),3'UTR(L)	-0.0653444	1.0907	0.0172163	0.335625	#N/A	0.99806
PMAIP1	1.34943	1	0.245378	0.481121	3'UTR(M)	-0.359272	#N/A	#N/A	#N/A	#N/A	0.11182
CAPN5	1.34678	1	0.245842	0.481778	3'UTR(F),3'UTR(M),3'UTR(L)	-0.133706	1.25174	0.0397759	0.403298	#N/A	2.5197e-08
CYP1B1	2.80433	2	0.246063	0.481901	3'UTR(M)	-0.0954647	-1.73149	0.28065	0.683751	#N/A	2.2024e-05
DMKN	1.34476	1	0.246197	0.481901	Intron,3'UTR(F)	0.197972	#N/A	#N/A	#N/A	#N/A	8.3445e-13
ARMC2	1.34422	1	0.246291	0.481901	Intron	-0.242016	#N/A	#N/A	#N/A	#N/A	2.4785e-09
MYNN	2.80015	2	0.246578	0.482134	3'UTR(F),3'UTR(M)	0.0626617	#N/A	#N/A	#N/A	#N/A	0.57129
KRAS	1.34208	1	0.246667	0.482134	3'UTR(M),3'UTR(L)	0.0822713	2.55701	0.0338111	0.381866	1	0.00078803
PLA2G12A	4.13924	3	0.246816	0.482173	3'UTR(M)	0.0436158	#N/A	#N/A	#N/A	#N/A	0.00037886
PPM1D	1.33969	1	0.247089	0.482455	3'UTR(M)	0.359188	#N/A	#N/A	#N/A	#N/A	2.2321e-11
RMND5A	1.33302	1	0.248269	0.484506	3'UTR(M)	-0.221325	#N/A	#N/A	#N/A	#N/A	0.89983
AC090114.2	1.33214	1	0.248425	0.484557	na	0.0591048	#N/A	#N/A	#N/A	#N/A	#N/A
SLC35E3	1.33083	1	0.248658	0.48476	3'UTR(F),3'UTR(M)	-0.00644075	#N/A	#N/A	#N/A	#N/A	5.8322e-07
UTP23	2.78036	2	0.249031	0.485234	3'UTR(F),3'UTR(M),3'UTR(L)	0.0238733	#N/A	#N/A	#N/A	#N/A	0.086364
CDH11	1.32748	1	0.249254	0.485417	3'UTR(F),3'UTR(L)	0.0733452	-0.678704	0.0652364	0.47143	#N/A	0.9999
NDUFAF6	1.32281	1	0.250088	0.486622	Intron	-0.149148	#N/A	#N/A	#N/A	#N/A	9.0736e-08
PCAT7	1.32256	1	0.250133	0.486622	na	-0.320639	#N/A	#N/A	#N/A	#N/A	#N/A
EIF2S1	1.31903	1	0.250767	0.487602	3'UTR(F),3'UTR(L)	-0.249163	0.073132	0.660177	0.893118	#N/A	0.97031
PRELID2	1.31598	1	0.251315	0.488414	3'UTR(F),3'UTR(L)	0.00904762	#N/A	#N/A	#N/A	#N/A	6.6487e-09
COL1A1	1.31409	1	0.251655	0.488822	3'UTR(M),3'UTR(L)	-0.0355637	0.556083	0.14721	0.580469	#N/A	1
NOL9	1.31277	1	0.251893	0.48903	3'UTR(M),3'UTR(L)	0.209805	-0.796484	0.327852	0.718431	#N/A	0.008884
NDUFAF3	1.31065	1	0.252278	0.489524	3'UTR(F),3'UTR(M)	-0.119701	0.61947	0.20107	0.631285	#N/A	0.0052693
CSTF3	1.30913	1	0.252552	0.489663	Intron,3'UTR(F)	-0.152543	0.0457406	0.929123	0.97969	#N/A	0.98279
MLX	1.3088	1	0.252611	0.489663	3'UTR(F),3'UTR(M)	-0.0366019	#N/A	#N/A	#N/A	#N/A	0.11032
ST5	1.30591	1	0.253136	0.490299	Intron,3'UTR(S)	0.0622526	-0.0974384	0.922339	0.978601	#N/A	0.99996
YAE1D1	1.30504	1	0.253295	0.490299	Intron	-0.133761	#N/A	#N/A	#N/A	#N/A	0.001499
JKAMP	1.30385	1	0.253511	0.490299	3'UTR(M),3'UTR(L)	0.0406092	#N/A	#N/A	#N/A	#N/A	0.076522
ARL3	1.30241	1	0.253774	0.490299	3'UTR(F),3'UTR(M),3'UTR(L)	-0.0207526	0.125433	0.599031	0.863485	#N/A	0.0014071
ZNF225	1.30209	1	0.253832	0.490299	3'UTR(M)	0.642442	#N/A	#N/A	#N/A	#N/A	0.11448
MCMBP	1.30207	1	0.253835	0.490299	3'UTR(F),3'UTR(M)	0.0218646	#N/A	#N/A	#N/A	#N/A	0.99565
KIAA1143	1.30196	1	0.253856	0.490299	3'UTR(M),3'UTR(L)	0.235941	#N/A	#N/A	#N/A	#N/A	0.0079624
PRPF40A	1.30101	1	0.25403	0.490382	3'UTR(M)	0.0526343	0.304515	0.523459	0.822017	#N/A	0.0391
RBM47	1.30011	1	0.254194	0.490446	Intron,3'UTR(L)	0.391403	#N/A	#N/A	#N/A	#N/A	0.98493
MAP3K13	1.29865	1	0.25446	0.490707	Intron	-0.109098	#N/A	#N/A	#N/A	#N/A	0.80051
ABCC5	1.29599	1	0.254948	0.491395	Intron,3'UTR(L)	0.0764576	#N/A	#N/A	#N/A	#N/A	0.0041518
UBXN7	2.73228	2	0.255089	0.491414	3'UTR(M),3'UTR(L)	0.0730809	0.11314	0.829671	0.941396	#N/A	0.99988
RHOU	1.29407	1	0.255299	0.491566	3'UTR(F),3'UTR(L)	-0.346616	#N/A	#N/A	#N/A	#N/A	0.077808
MARK3	1.29321	1	0.255458	0.491619	3'UTR(F),3'UTR(M),3'UTR(L)	-0.0796987	0.968711	0.407445	0.753352	#N/A	1.4273e-06
ZBTB20	1.28852	1	0.25632	0.492775	Intron,3'UTR(F)	-0.142964	#N/A	#N/A	#N/A	#N/A	0.97382
EFHD2	1.28834	1	0.256354	0.492775	3'UTR(F),3'UTR(M)	-0.0657694	-1.08172	0.0744662	0.484009	#N/A	0.0090981
KLF3	2.72161	2	0.256454	0.492775	Intron,3'UTR(F),3'UTR(M)	-0.0271184	#N/A	#N/A	#N/A	#N/A	0.8296
ATP8A2	1.28445	1	0.257073	0.493712	3'UTR(F),3'UTR(L)	-0.334718	#N/A	#N/A	#N/A	1	1.2026e-12
RAD50	2.71044	2	0.257891	0.494871	CDS,3'UTR(M)	-0.183912	0.541314	0.288218	0.691117	#N/A	3.4392e-27
CYB5B	1.27977	1	0.257941	0.494871	3'UTR(M)	-0.0800594	0.997181	0.00532477	0.285325	#N/A	0.093498
PDPK1	2.70324	2	0.258821	0.496165	3'UTR(F),3'UTR(M)	-0.00479892	0.82881	0.351881	0.727179	#N/A	0.98013
C2orf68	4.02404	3	0.25888	0.496165	Intron,3'UTR(F),3'UTR(M),3'UTR(L)	-0.122153	#N/A	#N/A	#N/A	#N/A	5.7612e-06
TRIP12	2.70057	2	0.259167	0.496461	3'UTR(F),3'UTR(M),3'UTR(L)	-0.0682438	0.291265	0.806511	0.936963	#N/A	1
OPTN	1.27018	1	0.259733	0.49729	3'UTR(F),3'UTR(M)	-0.0646749	0.658924	0.155864	0.589047	#N/A	5.91e-18
STAU2	5.27588	4	0.260144	0.497822	Intron,3'UTR(M)	0.299343	1.05923	0.00903163	0.310937	#N/A	0.97269
GFER	1.26471	1	0.260761	0.498495	3'UTR(F),3'UTR(M)	0.0300333	#N/A	#N/A	#N/A	#N/A	0.00017308
OTUD5	1.26471	1	0.260761	0.498495	3'UTR(F),3'UTR(M),3'UTR(L)	-0.0645297	#N/A	#N/A	#N/A	#N/A	0.99717
FAM175A	1.2637	1	0.260952	0.498604	3'UTR(F),3'UTR(M)	0.10243	#N/A	#N/A	#N/A	#N/A	5.0739e-07
ZNF347	1.25978	1	0.261693	0.499766	3'UTR(F),3'UTR(M),3'UTR(L)	0.381405	#N/A	#N/A	#N/A	#N/A	5.461e-05
CYB5D2	1.25714	1	0.262193	0.500464	3'UTR(F),3'UTR(M),3'UTR(L)	-0.346189	#N/A	#N/A	#N/A	#N/A	4.4253e-06
SSBP3	1.25493	1	0.262612	0.500935	3'UTR(M),3'UTR(L)	-0.0708673	#N/A	#N/A	#N/A	#N/A	0.99968
FYN	1.25385	1	0.262819	0.500935	3'UTR(M),3'UTR(L)	-0.0459387	1.05972	0.101028	0.532816	#N/A	0.99406
ASIC1	1.25373	1	0.262841	0.500935	3'UTR(F),3'UTR(L)	-0.0494057	#N/A	#N/A	#N/A	#N/A	0.93017
PPIG	1.24825	1	0.263888	0.5025	3'UTR(F),3'UTR(L)	-0.172153	0.517318	0.491841	0.804479	#N/A	0.96292
NAA40	2.66414	2	0.26393	0.5025	3'UTR(M)	-0.185229	#N/A	#N/A	#N/A	#N/A	9.7852e-09
ROR2	1.24367	1	0.264764	0.503832	Intron,3'UTR(L)	0.0601088	#N/A	#N/A	#N/A	#N/A	0.00012401
PRRX1	1.24278	1	0.264936	0.503902	Intron,3'UTR(L)	0.113265	-0.895604	0.0457691	0.418227	#N/A	0.24291
INPP5K	1.24166	1	0.265152	0.504058	3'UTR(F),3'UTR(M),3'UTR(L)	-0.224413	0.664196	0.503441	0.811827	#N/A	4.2264e-05
VAMP7	1.24079	1	0.265319	0.50412	Intron	-0.133333	0.733636	0.372412	0.730784	#N/A	0.013777
COBLL1	1.23594	1	0.266255	0.505641	Intron,3'UTR(M)	-0.214947	#N/A	#N/A	#N/A	#N/A	0.046671
ARNT	1.23307	1	0.26681	0.506439	3'UTR(M),3'UTR(L)	-0.106066	#N/A	#N/A	#N/A	#N/A	0.99581
SV2C	1.2312	1	0.267174	0.506873	Intron	-0.530801	#N/A	#N/A	#N/A	#N/A	2.4354e-05
MTRNR2L12	1.22784	1	0.267827	0.507854	5UTR	0.16109	#N/A	#N/A	#N/A	#N/A	NA
TMEM263	1.22659	1	0.268071	0.507908	3'UTR(F),3'UTR(M)	-0.0958015	0.429888	0.185652	0.617438	#N/A	#N/A
OTUB1	1.22519	1	0.268344	0.507908	3'UTR(F),3'UTR(M)	0.130751	-0.317571	0.192406	0.622109	#N/A	0.97107
CRAT	1.22469	1	0.268442	0.507908	Intron,3'UTR(S)	-0.0800134	0.24234	0.528622	0.822017	#N/A	9.4796e-12
PHAX	2.62982	2	0.268498	0.507908	3'UTR(F),3'UTR(M)	0.0364749	#N/A	#N/A	#N/A	#N/A	3.0443e-06
PTPN14	1.22422	1	0.268534	0.507908	Intron,3'UTR(L)	0.152726	0.611367	0.738658	0.914302	#N/A	0.22055
TBX18	1.21783	1	0.269787	0.510021	3'UTR(F),3'UTR(M)	-0.110947	#N/A	#N/A	#N/A	#N/A	0.99905
NDRG3	1.21476	1	0.270392	0.510907	3'UTR(F),3'UTR(M),3'UTR(L)	-0.12058	0.350007	0.406531	0.753304	#N/A	0.36564
GRAMD4	1.21326	1	0.270687	0.511085	3'UTR(F),3'UTR(L)	-0.0953923	0.0610126	0.96695	0.991356	#N/A	0.99998
EFCAB2	1.2129	1	0.270759	0.511085	Intron,3'UTR(S)	-0.290031	#N/A	#N/A	#N/A	#N/A	5.9198e-07
MYO6	3.91325	3	0.270986	0.511255	3'UTR(F),3'UTR(M),3'UTR(L)	-0.145355	0.533136	0.23416	0.658551	#N/A	2.4287e-05
PRICKLE1	1.20824	1	0.271681	0.51231	3'UTR(M)	0.0982103	#N/A	#N/A	#N/A	#N/A	0.99999
ZBTB8OS	1.20705	1	0.271918	0.512419	3'UTR(F),3'UTR(M)	0.0576784	#N/A	#N/A	#N/A	#N/A	0.70542
PAICS	1.20657	1	0.272013	0.512419	3'UTR(F),3'UTR(M)	-0.0617169	-0.427148	0.189197	0.620871	#N/A	2.7905e-05
TNPO1	2.60034	2	0.272486	0.513052	3'UTR(F),3'UTR(M)	-0.0544244	0.016696	0.943454	0.985124	#N/A	1
CD27-AS1	1.20113	1	0.273097	0.513727	na	-0.553004	#N/A	#N/A	#N/A	#N/A	#N/A
MARCH6	3.89419	3	0.273119	0.513727	3'UTR(F),3'UTR(M)	0.0580898	#N/A	#N/A	#N/A	#N/A	1
HMGB1	1.1986	1	0.273601	0.514375	3'UTR(F),3'UTR(M)	-0.046902	0.24092	0.227583	0.652554	#N/A	0.82035
NBEAL2	1.19493	1	0.274337	0.5155	Intron,3'UTR(S)	-0.461239	#N/A	#N/A	#N/A	#N/A	0.059764
PLPP3	1.19384	1	0.274556	0.51562	3'UTR(F),3'UTR(L)	0.148506	0.49374	0.796295	0.935136	#N/A	#N/A
CSTF2T	1.19325	1	0.274676	0.51562	3'UTR(M),3'UTR(L)	-0.153919	-2.71783	0.247658	0.666978	#N/A	0.086385
SBSPON	1.19225	1	0.274875	0.515715	3'UTR(F),3'UTR(M)	-0.280704	#N/A	#N/A	#N/A	#N/A	6.7083e-06
ETF1	1.19139	1	0.275049	0.515715	3'UTR(M),3'UTR(L)	-0.20295	0.46379	0.139414	0.568994	#N/A	0.996
MFSD11	2.58095	2	0.27514	0.515715	3'UTR(F),3'UTR(M),3'UTR(L)	-0.133579	#N/A	#N/A	#N/A	#N/A	6.7806e-06
STRN3	1.18599	1	0.27614	0.517182	3'UTR(M),3'UTR(L)	-0.0060875	-0.195214	0.661929	0.893792	#N/A	0.82925
[truncated: 2,993 more rows]
