# Supplementary material for: Partial loss of CFIm25 causes learning deficits and aberrant neuronal alternative polyadenylation
Source: eLife. 2020 Apr 22;9:e50895. doi: 10.7554/eLife.50895 (PMC7176433; doi:10.7554/eLife.50895)
Supplement: Figure 7—source data 1. — Differentially expressed gene (DEG), fold change (FC), mean expression of a gene across all samples (baseMean), log(FC) standard error (lfcSE), differential test statistic (stat), intellectual disability (ID), probability of loss of function intolerance (pLI). [file elife-50895-fig7-data1.xlsx]

## Sheet: iNeurons.DEG.MS
Gene name	DEG baseMean	DEG log2FC	DEG lfcSE	DEG stat	DEG p-value	DEG adju_p-value	DEG FC	Protein FC	ID gene	pLI
MB	271.871	-11.7614	1.74637	-6.73476	1.64e-11	3.37e-08	0.000288045	-4.77719	#N/A	0.030636
APH1B	391.472	8.43479	1.101	7.66104	1.84e-14	1.14e-10	346.039	#N/A	#N/A	2.84e-11
MYO18B	194.987	-9.57161	1.96751	-4.86482	1.15e-06	0.00048715	0.00131419	-1.72893	#N/A	1.03e-31
HSPB3	278.656	-8.27027	1.56703	-5.27767	1.31e-07	8.07e-05	0.00323892	-7.0261	#N/A	6.0944e-05
RPL6	13540.9	-0.974835	0.266093	-3.66351	0.000248779	0.0223938	0.508798	0.0573645	#N/A	0.99326
ENO3	554.894	-7.52869	1.0793	-6.97556	3.05e-12	9.39e-09	0.00541549	-9.32521	#N/A	1.57e-19
DLX1	247.468	-9.88242	1.56017	-6.33421	2.39e-10	4.2e-07	0.00105949	#N/A	#N/A	0.96232
ZNF425	192.442	-11.2625	1.81323	-6.21131	5.25e-10	8.1e-07	0.000407047	#N/A	#N/A	3.319e-05
CHRNB2	227.272	8.35296	1.37212	6.08765	1.15e-09	1.57e-06	326.957	#N/A	#N/A	0.00072964
UGT8	245.147	-8.82793	1.46271	-6.0353	1.59e-09	1.96e-06	0.00220054	#N/A	#N/A	0.027986
SHISA9	226.347	10.238	1.74331	5.87273	4.29e-09	4.81e-06	1207.64	#N/A	#N/A	0.87306
SCGN	414.437	-11.407	1.95048	-5.84832	4.97e-09	5.1e-06	0.000368251	#N/A	#N/A	2.34e-11
RND2	245.714	6.48783	1.12652	5.75919	8.45e-09	8.02e-06	89.7496	#N/A	#N/A	0.00038579
MTHFD2	10654.2	-1.37977	0.244735	-5.63779	1.72e-08	1.52e-05	0.384281	#N/A	#N/A	0.0023975
COX10-AS1	140.013	-10.8036	1.97782	-5.46237	4.7e-08	3.86e-05	0.000559486	#N/A	#N/A	#N/A
KLHL41	3492.91	-4.47125	0.483121	-9.25492	2.14e-20	2.64e-16	0.0450837	-5.54605	#N/A	0.00011107
KCNIP3	170.76	-9.36212	1.72572	-5.42506	5.79e-08	4.2e-05	0.00151957	#N/A	#N/A	0.037604
NECAB2	294.1	6.91966	1.30694	5.29456	1.19e-07	8.07e-05	121.067	#N/A	#N/A	2.24e-13
OTULIN	249.221	6.44414	1.22056	5.27967	1.29e-07	8.07e-05	87.0725	0.0645764	#N/A	#N/A
TNNI1	5567.07	-3.45293	0.930849	-3.70944	0.00020772	0.0194823	0.0913199	-8.40524	#N/A	7.0162e-05
GAL	949.853	-3.22145	0.620396	-5.19257	2.07e-07	0.000121799	0.107213	#N/A	#N/A	4.39e-06
ANO8	441.165	-4.07942	0.808415	-5.04619	4.51e-07	0.000252637	0.0591525	#N/A	#N/A	0.95634
MEF2C	1960.91	-2.53439	0.503384	-5.0347	4.79e-07	0.000256612	0.172613	#N/A	1	0.017256
WNT4	122.756	10.3184	2.05289	5.02626	5e-07	0.000256987	1276.85	#N/A	#N/A	0.12766
AC005736.2	129.945	-9.73304	1.94857	-4.99498	5.88e-07	0.000290257	0.00117507	#N/A	#N/A	#N/A
SRSF1	107.494	8.48425	2.26084	3.7527	0.000174941	0.0177236	358.107	0.0735346	#N/A	0.98268
JSRP1	177.166	-10.1808	2.08462	-4.88377	1.04e-06	0.000458386	0.000861546	#N/A	#N/A	6.1e-10
RELN	204.511	-9.1045	1.86228	-4.8889	1.01e-06	0.000458386	0.00181666	#N/A	1	1
MYLPF	10117.1	-3.3136	0.943619	-3.51158	0.000445446	0.0361397	0.100579	-4.40129	#N/A	0.76035
ATF5	5606.22	-1.4738	0.306524	-4.80812	1.52e-06	0.00062628	0.360032	#N/A	#N/A	0.29163
ARSE	1615.86	-1.73754	0.46776	-3.7146	0.000203523	0.0194562	0.29988	0.0956331	1	0.58982
CLSPN	113.168	-10.4966	2.20261	-4.76554	1.88e-06	0.000688851	0.000692148	#N/A	#N/A	0.0025864
AC113935.1	10989.1	-1.11912	0.23492	-4.76386	1.9e-06	0.000688851	0.460373	#N/A	#N/A	#N/A
CFAP44	145.924	-10.8632	2.27958	-4.76545	1.88e-06	0.000688851	0.000536842	#N/A	#N/A	#N/A
SEPSECS	149.597	-7.94444	1.67096	-4.75443	1.99e-06	0.000701191	0.00405961	#N/A	#N/A	1.61e-08
PPP1R32	128.48	9.42109	1.99283	4.7275	2.27e-06	0.000778616	685.536	#N/A	#N/A	2.44e-15
MBNL3	99.1486	-10.3059	2.18397	-4.71887	2.37e-06	0.000790433	0.000789997	#N/A	#N/A	0.68597
AKAP5	106.149	10.1087	2.14572	4.7111	2.46e-06	0.000799578	1104.13	#N/A	#N/A	0.65191
EME2	124.673	-10.6365	2.26039	-4.70561	2.53e-06	0.000800358	0.000628202	#N/A	#N/A	3.76e-23
RASSF4	2277.49	-2.5014	0.532566	-4.69689	2.64e-06	0.000814393	0.176605	#N/A	#N/A	1.73e-13
RPL22	9426.08	-1.21248	0.253212	-4.7884	1.68e-06	0.00066879	0.431526	0.14991	#N/A	0.15619
SLC44A1	3329.68	-1.45396	0.311331	-4.67015	3.01e-06	0.000888001	0.365017	#N/A	#N/A	0.99676
TNFRSF18	175.266	-8.19852	1.7603	-4.65745	3.2e-06	0.000910097	0.00340409	#N/A	#N/A	1.45e-06
ACTC1	25926.7	-3.25625	0.794836	-4.09676	4.19e-05	0.00645847	0.104658	-6.61718	#N/A	0.73668
DDIT4	7033.12	-1.60939	0.346257	-4.64797	3.35e-06	0.000918629	0.327736	#N/A	#N/A	0.00068309
ZNF658	105.287	-10.3922	2.2478	-4.62327	3.78e-06	0.00101266	0.000744107	#N/A	#N/A	9.04e-14
TRIB2	134.71	8.24039	1.7903	4.6028	4.17e-06	0.00107097	302.416	#N/A	#N/A	0.98349
LPIN3	107.223	10.1229	2.19793	4.60564	4.11e-06	0.00107097	1115.02	#N/A	#N/A	2.25e-13
RAPGEF5	159.377	7.02215	1.53283	4.58116	4.62e-06	0.00116377	129.981	#N/A	#N/A	0.98099
KCNS3	218.421	-5.48028	1.2016	-4.56082	5.1e-06	0.00125675	0.0224013	#N/A	#N/A	0.0011942
LINC01139	141.726	-7.37785	1.62777	-4.53249	5.83e-06	0.00140956	0.00601239	#N/A	#N/A	#N/A
LEPROTL1	2091.79	1.80799	0.399925	4.52083	6.16e-06	0.00146081	3.50155	#N/A	#N/A	0.72072
GRIP2	114.385	-10.5118	2.3393	-4.49358	7e-06	0.00162957	0.000684899	#N/A	#N/A	#N/A
SLC7A5	8402.54	-1.18838	0.332766	-3.57122	0.000355326	0.0298087	0.438796	0.241834	#N/A	0.23505
MIR762HG	129.819	-6.5679	1.49014	-4.40758	1.05e-05	0.00234381	0.0105406	#N/A	#N/A	#N/A
HDHD5	955.655	-2.21459	0.58385	-3.79308	0.00014879	0.0162378	0.215448	0.25308	#N/A	#N/A
AL138762.1	269.811	-7.4537	1.70098	-4.38199	1.18e-05	0.00254426	0.00570442	#N/A	#N/A	#N/A
CAPN6	2052.92	-2.90463	0.624043	-4.65453	3.25e-06	0.000910097	0.133543	-3.95659	#N/A	0.81903
ATAD5	93.0715	-10.2143	2.3448	-4.35615	1.32e-05	0.00276674	0.000841768	#N/A	#N/A	1
ZNF154	110.665	-10.4642	2.41442	-4.33404	1.46e-05	0.00300897	0.000707885	#N/A	#N/A	2.82e-07
CALY	2460.94	1.5524	0.360241	4.30933	1.64e-05	0.00331037	2.93305	#N/A	#N/A	0.038696
TPM1	18805.6	0.890581	0.232197	3.83545	0.000125332	0.0141798	1.85392	0.359895	#N/A	0.0010165
FBXL22	115.219	-7.43895	1.74534	-4.26217	2.02e-05	0.00390981	0.00576305	#N/A	#N/A	0.0014582
DES	3189.23	-2.49961	0.586534	-4.26167	2.03e-05	0.00390981	0.176824	-3.15981	#N/A	0.0088282
AC022826.2	86.5906	9.81488	2.30534	4.25746	2.07e-05	0.00392273	900.686	#N/A	#N/A	#N/A
RPS27L	13969.2	0.715072	0.191837	3.72749	0.000193396	0.0187792	1.64157	0.370173	#N/A	0.10011
BHLHE40-AS1	112.686	10.1945	2.41538	4.22065	2.44e-05	0.00448359	1171.79	#N/A	#N/A	#N/A
NUDT21	3113.57	-1.90025	0.453802	-4.1874	2.82e-05	0.00490375	0.267897	-0.683407	#N/A	0.98576
LOC100506125	116.023	-9.5696	2.28691	-4.18452	2.86e-05	0.00490375	0.00131602	#N/A	#N/A	#N/A
PSAT1	2727.2	-1.73449	0.411913	-4.21081	2.54e-05	0.00461461	0.300515	-0.445834	#N/A	1.06e-08
AC011497.2	114.464	8.4483	2.02066	4.18096	2.9e-05	0.00490375	349.294	#N/A	#N/A	#N/A
RPLP0	34297.5	-0.681678	0.163954	-4.15773	3.21e-05	0.00521556	0.62344	0.414821	#N/A	0.76762
SGCD	3047.39	-1.63178	0.373341	-4.37076	1.24e-05	0.00263259	0.322689	-1.15377	#N/A	0.0020725
LOC105372476	99.0152	-10.3041	2.46793	-4.17519	2.98e-05	0.00496185	0.000790981	#N/A	#N/A	#N/A
PDE7B	2091.1	-2.00329	0.481194	-4.16316	3.14e-05	0.00516092	0.249431	#N/A	#N/A	0.54578
MYL9	19572.2	0.78932	0.225747	3.49649	0.000471431	0.0372672	1.72826	0.462863	#N/A	0.019797
ZNF718	108.733	7.6841	1.85595	4.14024	3.47e-05	0.00555645	205.657	#N/A	#N/A	#N/A
RAB39A	163.007	5.87803	1.42362	4.12892	3.64e-05	0.00576235	58.8116	#N/A	#N/A	0.00089193
PLPP3	2186.3	-1.53772	0.452012	-3.40195	0.00066907	0.049407	0.344429	0.49374	#N/A	#N/A
ZNF22	2105.74	-1.56057	0.392361	-3.9774	6.97e-05	0.00954692	0.339016	-1.17163	#N/A	0.0020997
SNCAIP	941.152	-2.64967	0.648125	-4.08821	4.35e-05	0.00661831	0.159356	#N/A	#N/A	0.00032848
GPR135	93.8676	-10.2266	2.53477	-4.03453	5.47e-05	0.00803209	0.000834604	#N/A	#N/A	6.4853e-05
MAP3K9	126.745	6.61634	1.63878	4.03736	5.41e-05	0.00803209	98.111	#N/A	#N/A	0.11764
CRYBB2P1	119.114	7.37229	1.82856	4.03175	5.54e-05	0.00803209	165.684	#N/A	#N/A	#N/A
AC010343.1	6335.72	-1.16763	0.289224	-4.03712	5.41e-05	0.00803209	0.445152	#N/A	#N/A	#N/A
KIAA1324	85.2904	8.82824	2.19137	4.02864	5.61e-05	0.00804452	454.531	#N/A	#N/A	7.03e-13
SLC7A7	1147.55	-2.24796	0.563754	-3.98747	6.68e-05	0.00925322	0.210522	#N/A	1	7.95e-07
C6orf141	160.539	5.99013	1.50126	3.99008	6.61e-05	0.00925322	63.5638	#N/A	#N/A	NA
GLMN	61.4477	-9.61579	2.62112	-3.66858	0.000243899	0.0221676	0.00127456	0.515992	#N/A	1.15e-12
DARS	2079.07	-1.531	0.447456	-3.42157	0.000622599	0.0468164	0.346037	-0.447458	#N/A	8.536e-06
MAOB	951.709	-2.80353	0.702804	-3.98907	6.63e-05	0.00925322	0.143236	0.525435	#N/A	0.99903
ITPRIPL1	86.6406	-9.14724	2.30221	-3.97325	7.09e-05	0.00955008	0.00176363	#N/A	#N/A	1.88e-10
VEGFA	1525.06	-2.27464	0.573027	-3.96951	7.2e-05	0.00955008	0.206665	#N/A	#N/A	2.4085e-05
DLX2	507.959	-5.50928	1.39682	-3.94416	8.01e-05	0.0104168	0.0219555	#N/A	#N/A	0.97847
ITGA9-AS1	96.9444	-9.30927	2.36056	-3.94366	8.02e-05	0.0104168	0.00157627	#N/A	#N/A	#N/A
TAGLN	69167.6	0.793448	0.206577	3.84093	0.000122569	0.0139955	1.73321	0.584188	#N/A	0.08527
RBPMS	1353.78	1.81116	0.460523	3.93282	8.4e-05	0.0106735	3.50923	-3.76158	#N/A	0.97173
EFCAB12	85.5758	8.83266	2.25466	3.91752	8.95e-05	0.0111444	455.929	#N/A	#N/A	1.5401e-05
SRPK3	421.774	-5.01961	1.2808	-3.91913	8.89e-05	0.0111444	0.0308282	#N/A	#N/A	0.29235
ULBP3	103.4	9.10727	2.34019	3.89169	9.96e-05	0.0122765	551.521	#N/A	#N/A	4.74e-11
KLHL3	80.2845	8.74093	2.25287	3.87991	0.000104496	0.0126754	427.84	#N/A	#N/A	0.94479
CALD1	14886.4	0.925256	0.235058	3.9363	8.27e-05	0.0106298	1.89902	0.625237	#N/A	0.99879
BEX1	3326.7	1.32177	0.340949	3.87673	0.000105868	0.0126754	2.49973	#N/A	#N/A	0.54273
PECAM1	82.8513	-10.047	2.59557	-3.87081	0.000108472	0.0128449	0.000945274	#N/A	#N/A	#N/A
LIPE	216.445	5.71721	1.47777	3.86881	0.000109367	0.0128449	52.608	#N/A	#N/A	9.75e-12
MTRF1	83.5741	-10.0592	2.60747	-3.85784	0.000114393	0.0133084	0.000937285	#N/A	#N/A	1.62e-10
PTN	40791.3	-1.52102	0.21679	-7.01607	2.28e-12	9.38e-09	0.348441	-0.267036	#N/A	0.0075073
ORC5	170.946	6.78681	1.62186	4.18458	2.86e-05	0.00490375	110.416	0.659487	#N/A	2.115e-06
AKAP8	112.73	-7.40772	1.74397	-4.24761	2.16e-05	0.00403706	0.00588917	0.756919	#N/A	0.66425
DCN	26623.4	-1.37576	0.253323	-5.43087	5.61e-08	4.2e-05	0.385348	-0.489999	#N/A	0.31231
ECT2	293.889	-4.71599	1.23553	-3.81699	0.000135091	0.0150085	0.0380492	#N/A	#N/A	8.08e-10
BET1	1648.31	1.69608	0.444663	3.8143	0.00013657	0.0150374	3.24019	#N/A	#N/A	0.0038328
ACTA1	308.838	-6.11976	1.31068	-4.66916	3.02e-06	0.000888001	0.0143803	0.789435	#N/A	1.14e-06
MPP7	71.6579	-9.83705	2.5968	-3.78814	0.000151781	0.0164189	0.00109333	#N/A	#N/A	2.17e-11
ELFN1	183.407	-5.12539	1.35719	-3.77647	0.000159068	0.0170577	0.0286487	#N/A	#N/A	0.99882
FIBIN	5471.43	-1.2022	0.31233	-3.84912	0.000118543	0.0136623	0.434613	-0.0669628	#N/A	0.41581
NEFL	3655.85	1.12033	0.31029	3.6106	0.00030549	0.0258034	2.17397	0.821239	#N/A	#N/A
COL14A1	14113.7	-1.16122	0.277631	-4.18259	2.88e-05	0.00490375	0.447135	-0.791407	#N/A	1.43e-14
VCAM1	1204.89	-2.24674	0.597636	-3.75938	0.000170335	0.0176519	0.2107	#N/A	#N/A	0.79791
U47924.2	97.6346	9.02307	2.40479	3.75213	0.000175339	0.0177236	520.252	#N/A	#N/A	#N/A
SPCS2	2291.52	-1.46016	0.418643	-3.48784	0.000486933	0.0377664	0.363453	0.835128	#N/A	0.92879
AC011447.3	73.9626	9.58773	2.55524	3.75219	0.000175298	0.0177236	769.477	#N/A	#N/A	#N/A
GBX2	109.041	6.01001	1.60359	3.74784	0.000178367	0.0178831	64.4454	#N/A	#N/A	0.71347
RMDN2	109.453	5.98352	1.59782	3.74479	0.000180541	0.0179551	63.273	#N/A	#N/A	4.41e-24
CKB	9929.28	-1.1231	0.310921	-3.61218	0.000303633	0.0258034	0.459105	-0.914684	#N/A	0.2189
CD44	9228.9	1.02554	0.272083	3.76923	0.000163753	0.0172599	2.03572	0.867524	#N/A	2.45e-07
HTR1B	97.1811	6.07747	1.62962	3.72937	0.000191956	0.0187792	67.5305	#N/A	#N/A	0.18947
E2F2	85.4923	-9.12831	2.45214	-3.72259	0.000197189	0.0189979	0.00178692	#N/A	#N/A	0.25505
ITGA11	9250.9	1.07029	0.239698	4.46516	8e-06	0.00182718	2.09985	0.989986	#N/A	8.66e-08
SEPT9	4876.84	-1.01338	0.291307	-3.47873	0.000503803	0.0388306	0.495385	-0.760472	#N/A	0.99579
VGF	19671.5	0.942983	0.243198	3.87743	0.000105565	0.0126754	1.9225	1.48812	#N/A	0.56825
AC078850.1	98.0354	8.13478	2.1922	3.71077	0.000206626	0.0194823	281.068	#N/A	#N/A	#N/A
MRPS14	1275.58	2.16678	0.545559	3.97167	7.14e-05	0.00955008	4.4902	1.51255	#N/A	0.00016481
OLFM1	2540.77	1.51347	0.410125	3.69026	0.000224023	0.0206168	2.85495	#N/A	#N/A	0.99679
GAP43	15658.5	1.03655	0.252043	4.11259	3.91e-05	0.00610734	2.05132	1.55203	#N/A	0.021461
NUTM2B-AS1	180.594	4.62323	1.26043	3.66799	0.000244469	0.0221676	24.6451	#N/A	#N/A	#N/A
POSTN	32606	0.895023	0.241347	3.70845	0.000208536	0.0194823	1.85964	1.77531	#N/A	1.07e-09
EFCAB11	210.632	5.03709	1.38036	3.64912	0.000263137	0.0235146	32.8334	#N/A	#N/A	0.00023166
DUSP4	8005.83	0.994097	0.273329	3.637	0.000275828	0.0244713	1.99183	#N/A	#N/A	0.88152
CEBPG	3319.35	-1.21512	0.334724	-3.63022	0.000283178	0.024767	0.430737	#N/A	#N/A	0.43688
TRIB3	1826.4	-1.68373	0.463711	-3.63099	0.000282337	0.024767	0.311277	#N/A	#N/A	1.16e-13
IMPDH2	10050.4	-0.904604	0.240207	-3.76594	0.000165924	0.0173405	0.534179	-0.0744748	#N/A	4.36e-06
HOXD1	217.19	5.47249	1.51288	3.61726	0.000297741	0.0258034	44.4002	#N/A	#N/A	0.0031828
EAF2	94.9533	-7.07976	1.95804	-3.61573	0.0002995	0.0258034	0.00739228	#N/A	#N/A	2.22e-07
FN1	81495	0.792673	0.180156	4.39991	1.08e-05	0.00238478	1.73228	1.88806	#N/A	0.0014045
PREX2	137.367	-6.62981	1.83477	-3.61343	0.000302171	0.0258034	0.0100978	#N/A	#N/A	3.33e-16
CEND1	311.875	9.17803	1.34658	6.81582	9.37e-12	2.31e-08	579.244	2.20085	#N/A	0.59751
ANGPT1	1020.36	-2.61752	0.73519	-3.56033	0.000370393	0.0308628	0.162948	#N/A	#N/A	0.95208
MT1F	94.8009	8.30833	2.35305	3.53088	0.000414181	0.0342798	316.999	#N/A	#N/A	0.046878
DAGLA	103.09	5.78566	1.64067	3.5264	0.000421253	0.0346111	55.164	#N/A	#N/A	0.99999
TSNARE1	59.5053	9.27369	2.63098	3.5248	0.000423798	0.0346111	618.953	#N/A	#N/A	9.63e-07
RPL39	26525.3	-0.806619	0.213854	-3.77183	0.000162058	0.0172284	0.57172	-0.178531	#N/A	0.57637
IFFO1	732.775	2.66021	0.758625	3.50662	0.000453833	0.0365795	6.32125	#N/A	#N/A	0.00013393
TIMM17A	2542.23	1.26316	0.36043	3.5046	0.000457295	0.0366192	2.40021	#N/A	#N/A	0.21724
FTLP3	59195.2	0.609117	0.174029	3.50009	0.000465107	0.0370045	1.52533	#N/A	#N/A	#N/A
HAPLN1	5596.57	1.37838	0.322212	4.27787	1.89e-05	0.00375309	2.59977	2.2736	#N/A	0.60242
TBC1D31	88.4818	8.88135	2.54218	3.4936	0.000476557	0.0374325	471.578	#N/A	#N/A	8.6e-20
SPP1	7141.24	1.89459	0.386592	4.90074	9.55e-07	0.000452844	3.71816	3.66195	#N/A	2.146e-06
HSPBAP1	103.141	7.97175	2.28508	3.4886	0.000485549	0.0377664	251.036	#N/A	#N/A	4.41e-11
CIRBP	16545.5	-0.795342	0.212614	-3.74079	0.000183446	0.0180981	0.576207	-0.787628	#N/A	0.33636
RNF152	609.046	2.73879	0.795747	3.44179	0.000577887	0.0439907	6.67511	#N/A	#N/A	0.12894
TPT1	300911	-0.695939	0.181927	-3.82537	0.000130574	0.0146386	0.617307	-0.049282	#N/A	0.80548
RPS3AP6	21151.7	-0.782624	0.228716	-3.42182	0.000622042	0.0468164	0.581308	#N/A	#N/A	#N/A
RPS20	32772.4	-0.674337	0.195906	-3.44215	0.000577111	0.0439907	0.62662	-0.0524496	#N/A	0.020686
NHLH2	286.876	4.99975	1.46344	3.41644	0.000634454	0.0474187	31.9944	#N/A	#N/A	0.57964
INHBE	704.531	-3.80498	1.03051	-3.69234	0.000222204	0.0206031	0.0715464	4.87499	#N/A	1.12e-08
STAG3L4	166.207	5.91134	1.73733	3.40255	0.000667601	0.049407	60.1853	#N/A	#N/A	#N/A
EMC3-AS1	62.1982	-9.63325	2.84551	-3.38543	0.00071068	0.0521673	0.00125923	#N/A	#N/A	#N/A
LRRN1	3100.22	-1.33222	0.393799	-3.38298	0.000717034	0.0523222	0.397158	#N/A	#N/A	0.96996
AC099791.2	100.893	6.89361	2.03994	3.37932	0.000726641	0.0527114	118.9	#N/A	#N/A	#N/A
S1PR5	89.9248	6.95878	2.06119	3.3761	0.000735224	0.0530221	124.395	#N/A	#N/A	0.15713
CYSRT1	57.8688	9.23313	2.73729	3.3731	0.000743281	0.0532915	601.797	#N/A	#N/A	#N/A
RPS13P2	50284.6	-0.567944	0.168611	-3.36836	0.000756175	0.0539026	0.674578	#N/A	#N/A	#N/A
LRP4-AS1	63.4552	-9.66206	2.87488	-3.36086	0.000777004	0.0541903	0.00123433	#N/A	#N/A	#N/A
GLCCI1	1510.09	-2.06846	0.615	-3.36335	0.000770029	0.0541903	0.238414	#N/A	#N/A	0.05903
DUS4L	96.2852	6.13218	1.82474	3.36058	0.000777788	0.0541903	70.1408	#N/A	#N/A	3.1791e-05
CXorf23	145.492	-4.8973	1.45582	-3.36393	0.000768404	0.0541903	0.0335557	#N/A	#N/A	0.62532
SLC12A8	879.882	2.08514	0.620792	3.35884	0.000782714	0.0542271	4.24315	#N/A	#N/A	5.31e-19
KAT7	323.279	-2.99876	0.893867	-3.35481	0.000794186	0.0547146	0.125108	#N/A	#N/A	0.99999
PCYT1B	124.078	4.69287	1.39951	3.35323	0.000798745	0.0547229	25.8639	#N/A	#N/A	0.89723
KIF17	63.3851	9.36505	2.79541	3.35016	0.000807661	0.0550281	659.417	#N/A	#N/A	3.76e-18
PLAG1	61.8737	9.33027	2.79167	3.34218	0.000831223	0.0563222	643.713	#N/A	#N/A	0.99532
MTUS1	486.307	3.5339	1.05832	3.33915	0.000840361	0.0566302	11.5827	#N/A	#N/A	3.58e-11
FAM57B	1308.85	1.65671	0.496846	3.33446	0.000854656	0.0572805	3.15297	#N/A	#N/A	0.66468
TCP11	63.3198	9.36359	2.81025	3.33194	0.000862423	0.0574887	658.751	#N/A	#N/A	1.06e-07
SYNGR3	1074.69	1.80246	0.54225	3.32403	0.000887259	0.0582004	3.48814	#N/A	#N/A	0.52946
ZNF781	61.6235	9.32428	2.80502	3.32414	0.000886915	0.0582004	641.046	#N/A	#N/A	NA
EEF1A1	309128	-0.673357	0.20254	-3.32457	0.000885561	0.0582004	0.627046	0.244084	#N/A	0.97863
TERF2	628.315	3.09631	0.933309	3.31756	0.000908085	0.0592513	8.55226	1.81004	#N/A	0.99237
NR1D1	131.725	5.21898	1.57778	3.3078	0.000940318	0.0606245	37.2451	#N/A	#N/A	0.81796
CPNE1	3139.53	-1.33699	0.404371	-3.30635	0.000945198	0.0606245	0.395845	-0.343368	#N/A	1.73e-14
IRAK2	56.3448	9.19444	2.78174	3.30529	0.000948794	0.0606245	585.872	#N/A	#N/A	2.61e-19
RPL23AP42	44369.3	-0.658017	0.198828	-3.30948	0.00093471	0.0606245	0.633749	#N/A	#N/A	#N/A
RGL1	1125.68	-2.09075	0.633824	-3.29863	0.000971568	0.0610605	0.234758	#N/A	#N/A	0.95608
ZNF708	56.791	9.20617	2.79122	3.29826	0.000972866	0.0610605	590.654	#N/A	#N/A	5.5534e-05
CRELD1	420.728	-3.65606	1.10873	-3.29753	0.000975391	0.0610605	0.0793259	-3.15132	#N/A	1.34e-11
APOBEC2	137.023	-6.32407	1.91783	-3.29752	0.000975422	0.0610605	0.0124814	-7.91946	#N/A	0.01707
PLEKHA6	56.5398	-9.49505	2.88224	-3.29434	0.000986547	0.0614449	0.00138581	#N/A	#N/A	0.013746
AC025754.2	60.6623	9.3017	2.83135	3.28526	0.0010189	0.0631409	631.089	#N/A	#N/A	#N/A
FSIP1	52.4862	9.09267	2.77125	3.28107	0.00103413	0.0637646	545.965	#N/A	#N/A	7.7e-14
EIF1	57060.5	-0.538833	0.16455	-3.27458	0.0010582	0.0646027	0.688328	-0.537281	#N/A	0.8307
LYPD1	2812.29	1.53346	0.468251	3.27487	0.00105711	0.0646027	2.89479	#N/A	#N/A	0.00055354
ZEB1	4021.38	-1.17685	0.359648	-3.27224	0.00106699	0.0648184	0.442315	#N/A	#N/A	0.96665
RPL7AP6	19343.6	-0.694156	0.212319	-3.26941	0.00107772	0.0651491	0.618071	#N/A	#N/A	#N/A
JHDM1D-AS1	64.4013	8.42217	2.57836	3.26648	0.00108893	0.0655057	343.025	#N/A	#N/A	#N/A
TCP11L1	81.1336	7.55314	2.31652	3.26056	0.00111193	0.0665644	187.811	#N/A	#N/A	0.0043702
CDKN1C	3786.96	-1.44601	0.444817	-3.25081	0.00115078	0.068228	0.367034	-2.34854	#N/A	0.81963
TMEM167A	5076.92	1.23016	0.378262	3.25214	0.00114539	0.068228	2.34593	0.0538346	#N/A	0.00042515
IGFBP4	27572	-0.585864	0.180329	-3.24886	0.00115868	0.0683676	0.66625	#N/A	#N/A	0.023057
F2RL2	316.58	3.73458	1.15017	3.24699	0.00116632	0.068491	13.3113	#N/A	#N/A	1.7486e-05
UPF3B	441.524	3.20886	0.988814	3.24516	0.00117385	0.0686062	9.24618	0.612698	1	0.98497
PSD	1590.37	1.41874	0.438611	3.23463	0.00121801	0.0705943	2.67352	#N/A	#N/A	0.90358
ERICH2	59.7939	9.28038	2.86934	3.23432	0.00121931	0.0705943	621.833	#N/A	#N/A	0.0063781
CYP46A1	89.5284	6.72166	2.08577	3.22263	0.00127018	0.0731957	105.541	#N/A	#N/A	0.98552
FAM102B	718.828	2.2362	0.694854	3.21823	0.00128985	0.0739833	4.71155	#N/A	#N/A	0.00039858
LINC00702	54.4006	9.14429	2.84392	3.21538	0.00130272	0.0743754	565.854	#N/A	#N/A	#N/A
NPM1	8398.1	-0.854608	0.265931	-3.21364	0.00131064	0.074483	0.553016	-0.0431294	#N/A	0.99816
MICAL2	1013.1	2.22435	0.693359	3.20808	0.00133623	0.0753879	4.67301	#N/A	#N/A	2.18e-12
PANCR	47.2354	-9.2361	2.8795	-3.20753	0.00133879	0.0753879	0.00165827	#N/A	#N/A	#N/A
RPL12	255.058	-3.32857	1.03959	-3.20181	0.00136568	0.0765527	0.0995409	0.0949915	#N/A	0.053094
AL162411.1	57.0766	9.21378	2.88369	3.19514	0.00139763	0.0779893	593.777	#N/A	#N/A	#N/A
AL359922.1	132.199	5.3211	1.66675	3.1925	0.00141048	0.0783514	39.9772	#N/A	#N/A	#N/A
CCDC149	461.234	-3.28365	1.02897	-3.19119	0.00141689	0.0783545	0.102689	#N/A	#N/A	1.9023e-05
ARSG	56.4358	8.23018	2.58063	3.18921	0.00142661	0.0785398	300.284	#N/A	#N/A	6.37e-10
PARP12	53.5333	-9.41652	2.95411	-3.1876	0.00143458	0.0786275	0.00146334	#N/A	#N/A	9.25e-08
RNF170	678.799	-2.30547	0.725757	-3.17664	0.0014899	0.0812986	0.202294	-0.562284	#N/A	0.51091
INHBA	4066.24	1.00956	0.318245	3.17227	0.00151254	0.0821702	2.01329	#N/A	#N/A	0.97979
ACTN1	28780.1	0.785841	0.24861	3.16094	0.00157261	0.0850587	1.7241	0.28558	#N/A	0.99997
NAMPT	3446.72	-1.38773	0.43982	-3.15523	0.0016037	0.0863615	0.382164	0.161251	#N/A	0.97914
FOSL1	51.2164	9.05742	2.87214	3.15354	0.00161303	0.0864865	532.789	#N/A	#N/A	0.15849
AP005202.1	74736.3	-0.628902	0.199918	-3.1458	0.0016563	0.0884223	0.646668	#N/A	#N/A	#N/A
SPAG16	1600.48	-1.67024	0.531292	-3.14373	0.00166809	0.0886677	0.314201	#N/A	#N/A	1.4e-34
DCAF4L1	56.31	9.1935	2.92845	3.13938	0.00169306	0.0896088	585.492	#N/A	#N/A	0.31806
OAZ3	118.169	-6.28454	2.00637	-3.13229	0.0017345	0.0914094	0.0128282	#N/A	#N/A	2.2775e-05
EIF3D	6268.23	-1.06119	0.339	-3.13037	0.00174589	0.0916183	0.479235	0.0380471	#N/A	0.99983
CACNB4	48.6236	8.98253	2.87581	3.12348	0.00178726	0.0933917	505.838	#N/A	#N/A	0.030679
ABCA17P	50.7209	-9.33911	2.99314	-3.12017	0.00180746	0.094049	0.001544	#N/A	#N/A	#N/A
ATM	1137.5	-2.18837	0.701706	-3.11863	0.00181691	0.0941434	0.2194	0.752243	#N/A	5.59e-47
RPS27A	33340.8	-0.687555	0.220666	-3.11581	0.00183438	0.0946509	0.620905	-0.0554236	#N/A	0.91944
KIFC3	2281.13	1.23107	0.395668	3.11138	0.00186212	0.0952851	2.34742	#N/A	#N/A	0.0056474
LOC105371814	3236.34	1.29316	0.41552	3.11214	0.00185736	0.0952851	2.45064	#N/A	#N/A	#N/A
RPL13	36333.2	-0.702283	0.226012	-3.10728	0.00188817	0.0958668	0.614599	0.0296378	#N/A	0.95062
SCRT1	54.4138	9.14491	2.94319	3.10714	0.00188904	0.0958668	566.1	#N/A	#N/A	0.22224
SDAD1P1	58.5231	8.28424	2.66937	3.10344	0.00191285	0.0966288	311.749	#N/A	#N/A	#N/A
NOTCH1	2222.27	-1.63582	0.527278	-3.10238	0.00191972	0.0966288	0.321788	#N/A	#N/A	1
FYN	6489.01	-0.954453	0.30805	-3.09837	0.0019459	0.097548	0.516037	1.05972	#N/A	0.99406
LINC00863	95.2776	6.40768	2.06927	3.09659	0.0019576	0.0977372	84.8994	#N/A	#N/A	#N/A
AC079140.2	62214	-0.714328	0.230879	-3.09395	0.00197513	0.0982149	0.609489	#N/A	#N/A	#N/A
TMEM150C	309.15	-3.80444	1.23132	-3.08971	0.00200352	0.0992265	0.0715732	#N/A	#N/A	0.013116
C16orf89	89.2441	6.65569	2.15674	3.086	0.00202867	0.10007	100.824	#N/A	#N/A	1.63e-16
PLEKHA7	67147.7	-0.704694	0.228768	-3.08039	0.00206733	0.101448	0.613573	#N/A	#N/A	6.22e-09
TMEM38B	1212.37	-1.82739	0.593395	-3.07956	0.00207305	0.101448	0.281773	-1.36469	#N/A	0.019501
AC246787.1	75203.5	-0.641371	0.208461	-3.0767	0.00209304	0.102021	0.641103	#N/A	#N/A	#N/A
GPT2	2399.58	-1.26416	0.411287	-3.07366	0.00211448	0.10266	0.416342	1.81564	1	0.00034046
ABCB7	1480.6	-1.50837	0.492087	-3.06525	0.00217486	0.105178	0.351508	#N/A	#N/A	0.99994
MT2A	3953.24	1.14558	0.37434	3.06027	0.00221136	0.106525	2.21235	#N/A	#N/A	1.2279e-05
MIR5096	7811.44	0.903298	0.295595	3.05586	0.00224414	0.106852	1.87034	#N/A	#N/A	#N/A
RPL27A	99167.7	-0.519968	0.170154	-3.05587	0.0022441	0.106852	0.697387	-0.147555	#N/A	0.91072
FGFR3	195.927	4.46512	1.46102	3.05616	0.00224193	0.106852	22.0869	#N/A	1	1.6432e-05
LRRC32	1347.76	1.65472	0.542519	3.05007	0.00228786	0.107702	3.14863	#N/A	#N/A	0.001078
LINC01979	45.2795	8.8794	2.90949	3.05188	0.00227415	0.107702	470.939	#N/A	#N/A	#N/A
CDKN1A	7847.55	0.739366	0.242413	3.05003	0.0022882	0.107702	1.66944	#N/A	#N/A	0.0018575
ADM2	131.356	-6.02252	1.97566	-3.04835	0.00230098	0.107892	0.015383	#N/A	#N/A	0.020009
ZNF815P	72.4669	6.99112	2.29548	3.0456	0.00232218	0.108474	127.214	#N/A	#N/A	#N/A
ZDHHC22	219.112	4.34105	1.43224	3.03096	0.00243776	0.112733	20.2669	#N/A	#N/A	0.054892
PLCG2	50.3244	9.03162	2.97998	3.03076	0.00243936	0.112733	523.344	#N/A	#N/A	0.99562
H3F3B	37804.6	-0.504631	0.166513	-3.03059	0.00244079	0.112733	0.704841	-0.175198	#N/A	0.80682
RPS28P7	123222	-0.556606	0.184535	-3.01626	0.00255911	0.115911	0.6799	#N/A	#N/A	#N/A
CRYL1	1302.49	-1.65955	0.550153	-3.01653	0.00255686	0.115911	0.316537	0.847826	#N/A	3.72e-06
ZNF814	62.8715	-7.96474	2.64131	-3.01545	0.00256598	0.115911	0.00400289	#N/A	#N/A	0.044817
LOC105374366	51.2311	-8.3885	2.78049	-3.01692	0.00255359	0.115911	0.00298407	#N/A	#N/A	#N/A
PRSS12	2955.46	-1.33534	0.442349	-3.01874	0.00253824	0.115911	0.396299	-2.20623	1	8.38e-29
SLC35A2	1134.97	1.57651	0.522475	3.01738	0.00254969	0.115911	2.98247	#N/A	1	0.71792
AC004386.1	6094.97	-1.16863	0.387843	-3.01317	0.00258537	0.116361	0.444842	#N/A	#N/A	#N/A
CSDE1	20808.4	-0.579362	0.192459	-3.01032	0.00260977	0.117031	0.66926	0.0856845	#N/A	1
FGFR1OP	408.769	3.53413	1.17547	3.00656	0.00264224	0.118058	11.5845	2.84118	#N/A	0.00062816
NSG1	3990.51	1.09286	0.363669	3.00509	0.00265504	0.118202	2.13296	#N/A	#N/A	0.0088286
LARGE1	771.793	3.10489	1.03617	2.9965	0.00273098	0.120504	8.60328	#N/A	#N/A	#N/A
TUBB2A	10277.7	0.722808	0.241188	2.99686	0.00272773	0.120504	1.65039	0.478195	#N/A	0.93478
UPP1	1525.76	1.43862	0.480191	2.99593	0.00273605	0.120504	2.71062	#N/A	#N/A	0.00037588
PDZD7	3852.22	-1.28342	0.429046	-2.99133	0.00277766	0.120613	0.410821	#N/A	#N/A	7.64e-10
LZTS2	3852.35	-1.28349	0.429004	-2.99179	0.0027735	0.120613	0.410801	#N/A	#N/A	0.046089
PRSS23	14930.5	0.789367	0.263772	2.99261	0.00276605	0.120613	1.72832	1.85566	#N/A	1.9421e-05
LMAN2	5049.46	0.826772	0.276162	2.9938	0.00275527	0.120613	1.77371	0.246592	#N/A	0.00010742
RAD51AP1	290.972	-4.04247	1.35343	-2.98684	0.00281877	0.121969	0.060687	#N/A	#N/A	0.011096
SLCO3A1	167.941	-5.64309	1.89248	-2.98185	0.0028651	0.12354	0.0200107	#N/A	#N/A	0.38961
CCT6B	70.9911	7.62424	2.55884	2.97957	0.00288655	0.124031	197.299	#N/A	#N/A	5.67e-11
TIAL1	3400.16	0.912743	0.306614	2.97685	0.00291227	0.124322	1.88262	0.00551898	#N/A	0.99992
RPS23	47556.2	-0.707615	0.237716	-2.97672	0.00291349	0.124322	0.612332	-0.355435	#N/A	0.85944
VTI1A	246.436	4.19808	1.41286	2.97133	0.00296509	0.126088	18.3547	-0.161811	#N/A	0.00054173
PLCH2	48.9257	8.99146	3.02942	2.96804	0.00299701	0.126656	508.98	#N/A	#N/A	1.81e-18
DCBLD2	4250.34	0.99586	0.33555	2.96784	0.00299899	0.126656	1.99427	#N/A	#N/A	0.095418
GDAP2	74.2426	7.03085	2.37056	2.9659	0.00301795	0.127022	130.766	2.38501	#N/A	1.46e-09
FZD4	1090.12	-1.76244	0.595267	-2.96075	0.0030689	0.128724	0.29475	#N/A	#N/A	0.96962
PACS2	2277.55	1.39701	0.472009	2.95971	0.00307928	0.128724	2.63355	-0.965245	#N/A	0.99583
LINGO1	763.346	2.0074	0.679058	2.95616	0.00311499	0.128906	4.02057	#N/A	#N/A	0.99413
PERP	2303.14	1.15872	0.391886	2.95677	0.00310875	0.128906	2.23259	#N/A	#N/A	0.079462
PEG10	11018.1	-0.691823	0.233922	-2.95749	0.00310153	0.128906	0.619071	0.694432	#N/A	0.87274
ASXL2	842.407	-2.98478	1.01057	-2.95356	0.00314136	0.129563	0.126325	#N/A	#N/A	1
SH3BGRL3	13638.9	0.631924	0.214051	2.95221	0.00315508	0.129695	1.54963	0.130712	#N/A	0.149
AC034236.1	41423.6	-0.577044	0.195726	-2.94822	0.00319606	0.130943	0.670336	#N/A	#N/A	#N/A
C1QTNF4	496.73	-2.59708	0.881401	-2.94653	0.00321358	0.131225	0.165273	#N/A	#N/A	0.17229
TINF2	596.639	-2.57016	0.874507	-2.93898	0.00329295	0.134007	0.168386	#N/A	#N/A	0.0012666
FAM126A	2707.46	-1.37005	0.466321	-2.93799	0.00330345	0.134007	0.386879	#N/A	1	0.12103
UCHL1	18295.4	0.558915	0.190325	2.93663	0.00331797	0.134155	1.47316	0.56536	#N/A	0.99095
GTF3C2	750.344	2.22874	0.760919	2.92901	0.00340045	0.13704	4.68724	0.659515	#N/A	0.9944
CAPRIN1	6112.98	0.756525	0.258686	2.92449	0.00345026	0.138196	1.68942	0.238683	#N/A	0.97247
CRIM1	2722.08	1.20743	0.412884	2.92437	0.00345153	0.138196	2.30925	#N/A	#N/A	0.99971
H6PD	3329.36	-1.00764	0.346266	-2.91001	0.00361417	0.144239	0.49736	-0.925675	#N/A	8.59e-09
CAP1	18971.4	0.620463	0.213394	2.90759	0.00364221	0.144646	1.53737	0.245047	#N/A	0.019817
VWC2	47.3591	8.94446	3.07752	2.90639	0.00365629	0.144646	492.664	#N/A	#N/A	0.97088
NCS1	8072.54	0.84935	0.292264	2.90611	0.00365955	0.144646	1.80169	-6.19758	#N/A	0.66434
TNNT3	2275.86	-4.22913	1.45947	-2.89771	0.00375897	0.147629	0.0533218	-10.754	#N/A	2.08e-07
TTC30B	189.343	4.42731	1.52761	2.8982	0.00375311	0.147629	21.5155	#N/A	#N/A	4.57e-08
NEURL1	356.032	3.20922	1.11199	2.88601	0.0039016	0.148502	9.24853	#N/A	#N/A	0.011091
MGP	25240.8	-0.815628	0.281831	-2.89403	0.00380329	0.148502	0.568161	0.270249	#N/A	3.6072e-05
NABP2	1554.31	1.49708	0.517766	2.89143	0.00383493	0.148502	2.82272	#N/A	#N/A	0.97257
RPS15A	11145.4	-0.851277	0.294653	-2.88908	0.00386367	0.148502	0.554294	0.673971	#N/A	0.802
LCMT1	3176.62	-1.07839	0.37322	-2.88941	0.00385964	0.148502	0.473558	0.369288	#N/A	1.789e-05
CRISPLD2	15900.2	-0.806505	0.279373	-2.88684	0.00389138	0.148502	0.571765	0.585497	#N/A	7.82e-09
ZHX3	457.009	-3.13972	1.08572	-2.89182	0.00383012	0.148502	0.113462	#N/A	#N/A	0.050815
COL9A1	87.9652	-6.24538	2.15843	-2.89349	0.0038099	0.148502	0.0131811	#N/A	#N/A	3.07e-19
SSC4D	42.7223	8.79523	3.0446	2.88879	0.00386724	0.148502	444.25	#N/A	#N/A	#N/A
NAIF1	161.078	-4.94402	1.71286	-2.88641	0.0038967	0.148502	0.0324865	#N/A	#N/A	0.28561
NTRK2	4764.87	-1.38749	0.481262	-2.88302	0.00393885	0.149458	0.38223	#N/A	#N/A	1
IFT43	1028.41	2.35836	0.819681	2.87717	0.00401259	0.151789	5.12788	#N/A	#N/A	1.82e-11
RPS21P4	61033.3	-0.603156	0.209947	-2.87289	0.00406738	0.153391	0.658312	#N/A	#N/A	#N/A
ALG10B	58.7837	7.63141	2.6627	2.86604	0.0041564	0.156271	198.283	#N/A	#N/A	2.03e-08
ARHGDIG	279.167	3.57922	1.24954	2.86443	0.00417758	0.15659	11.9524	#N/A	#N/A	0.92154
MFGE8	5105.94	0.832905	0.291159	2.86065	0.00422771	0.157988	1.78127	2.28617	#N/A	4.3953e-05
ZNF677	762.978	-1.92057	0.671864	-2.85857	0.00425557	0.158549	0.26415	#N/A	#N/A	1.66e-08
AL109917.1	44.0634	7.87412	2.76632	2.84642	0.00442134	0.159514	234.611	#N/A	#N/A	#N/A
TNNT2	720.614	-2.11288	0.740098	-2.85487	0.00430543	0.159514	0.231184	-8.22568	#N/A	0.0020041
WDR62	259.54	4.87113	1.71142	2.84625	0.00442375	0.159514	29.2654	#N/A	1	2.36e-23
LOC400706	45.8225	8.89637	3.11874	2.85255	0.00433693	0.159514	476.511	#N/A	#N/A	#N/A
RAB3GAP1	1984.03	1.14597	0.401984	2.85078	0.00436127	0.159514	2.21294	0.745727	1	1.45e-07
TNNC2	1445.44	-5.01946	1.75836	-2.85463	0.00430867	0.159514	0.0308313	-6.97977	#N/A	0.01624
AC012603.1	42.5818	8.79068	3.0844	2.85005	0.00437128	0.159514	442.851	#N/A	#N/A	#N/A
BMP6	11718.3	-0.952823	0.334605	-2.8476	0.00440497	0.159514	0.516621	#N/A	#N/A	0.75947
PHIP	635.752	1.85849	0.652314	2.84908	0.00438458	0.159514	3.62629	-1.19648	1	1
PSPH	1687.59	-1.49287	0.524365	-2.84701	0.00441318	0.159514	0.355304	-0.220846	#N/A	0.00096703
CRCP	1247.77	-1.77851	0.624543	-2.8477	0.00440363	0.159514	0.291484	#N/A	#N/A	8.97e-07
TRIM3	41.4382	8.7511	3.07663	2.84438	0.00444985	0.159987	430.868	-0.791078	1	0.9893
C1R	1992.72	-1.49256	0.525671	-2.83934	0.00452073	0.161593	0.355382	#N/A	#N/A	0.77888
GTF3C3	970.428	-2.00419	0.705829	-2.83949	0.0045186	0.161593	0.249274	2.63731	#N/A	6.97e-07
CACNA2D1	245.059	-3.90374	1.37575	-2.83752	0.00454649	0.162044	0.0668126	-2.37002	#N/A	0.99989
PGM2L1	2859.02	1.02485	0.361479	2.83517	0.00458016	0.162306	2.03475	1.40615	#N/A	0.02591
KAT2A	751.683	1.78601	0.629748	2.83608	0.00456713	0.162306	3.44861	#N/A	#N/A	0.57331
DLK1	22406.8	-0.808128	0.285206	-2.83349	0.00460422	0.162691	0.571122	-0.580701	#N/A	0.034576
CBR3	208.053	4.43757	1.56802	2.83005	0.00465403	0.163981	21.6691	#N/A	#N/A	3.02e-06
USH1C	54.5948	-7.2414	2.56059	-2.82802	0.00468367	0.164556	0.00660876	#N/A	#N/A	3.97e-18
ITPR2	50.3423	8.06391	2.85281	2.82665	0.00470373	0.164791	267.596	4.11843	#N/A	5.71e-29
SYNPO2	231.087	-4.94447	1.7498	-2.82573	0.00471727	0.164797	0.0324762	-2.42673	#N/A	8.56e-08
RAB27B	401.17	3.01893	1.06972	2.82218	0.0047699	0.166165	8.10565	#N/A	#N/A	0.038714
SOX8	1426.5	-1.55571	0.551584	-2.82044	0.00479574	0.166595	0.340161	#N/A	#N/A	0.67167
ALDH1B1	1993.29	1.32851	0.47136	2.81846	0.00482545	0.167156	2.51143	0.517805	#N/A	2.7e-06
XPOT	2875.45	-1.0706	0.380457	-2.81398	0.0048933	0.169031	0.476122	-0.241733	#N/A	0.99711
THBS1	23840.5	0.592138	0.210638	2.81116	0.0049363	0.17004	1.50748	1.92013	#N/A	0.99985
CHD5	765.99	2.89125	1.03018	2.80654	0.0050077	0.1713	7.41911	#N/A	#N/A	1
AP001024.1	36512.1	-0.607803	0.216728	-2.80445	0.00504022	0.1713	0.656195	#N/A	#N/A	#N/A
OTUD7A	72.0315	6.99263	2.49352	2.80432	0.00504231	0.1713	127.348	#N/A	#N/A	0.95249
C16orf52	623.388	-2.27335	0.809785	-2.80735	0.00499514	0.1713	0.20685	#N/A	#N/A	0.25928
C2orf76	513.606	2.13839	0.762271	2.80529	0.00502712	0.1713	4.40271	-1.3503	#N/A	0.0054177
PRPH	628.206	-2.71506	0.969427	-2.80069	0.00509942	0.172347	0.152295	0.43352	#N/A	4.79e-14
LPL	657.491	3.12079	1.11434	2.80058	0.00510108	0.172347	8.69863	#N/A	#N/A	1.27e-09
CYHR1	2712.16	1.07323	0.383422	2.79909	0.00512472	0.172672	2.10414	1.55736	#N/A	0.49115
PHB2	8550.06	-0.63515	0.227653	-2.78999	0.00527091	0.175507	0.643874	0.418105	#N/A	0.0039339
PRPF8	2917.23	-0.960017	0.344141	-2.78961	0.00527724	0.175507	0.514051	0.260805	#N/A	1
Z74021.1	96182.2	-0.605922	0.217111	-2.79084	0.00525711	0.175507	0.657051	#N/A	#N/A	#N/A
RPL15	55820.9	-0.601339	0.215645	-2.78856	0.00529423	0.175507	0.659142	-0.0201585	#N/A	0.97146
ARF4	8995.15	0.649686	0.232956	2.78889	0.00528897	0.175507	1.56883	-0.148403	#N/A	0.95992
CNPY4	2070.22	-1.12284	0.40219	-2.79181	0.00524149	0.175507	0.45919	-1.056	#N/A	1.03e-13
PREX1	500.528	-3.72114	1.33517	-2.78702	0.00531958	0.175874	0.0758272	#N/A	#N/A	1
CEBPD	4510.88	-0.997004	0.358424	-2.78163	0.00540864	0.17834	0.501039	#N/A	#N/A	0.61219
SSPN	4140.56	-1.10853	0.398939	-2.7787	0.00545763	0.179476	0.463765	0.114459	#N/A	0.039646
IGFL3	394.847	3.91553	1.40961	2.77774	0.00547389	0.179532	15.0901	#N/A	#N/A	0.012036
RHOC	13930.5	0.543551	0.196023	2.7729	0.00555599	0.181011	1.45756	#N/A	#N/A	0.76766
A1BG-AS1	48.2558	8.00513	2.88579	2.77398	0.00553756	0.181011	256.911	#N/A	#N/A	#N/A
PDLIM3	2673.37	-1.26529	0.456372	-2.77248	0.00556303	0.181011	0.416017	-1.44115	#N/A	3.03e-07
VN1R82P	150.572	-4.52619	1.63366	-2.77058	0.00559559	0.181592	0.0433992	#N/A	#N/A	#N/A
CD151	7013.61	0.879562	0.318087	2.76517	0.00568937	0.18415	1.83982	#N/A	#N/A	1.0841e-05
FOXF2	123.696	5.35444	1.93743	2.76368	0.00571529	0.184505	40.9117	#N/A	#N/A	0.84666
LOC101927809	140.715	-4.95239	1.79565	-2.75799	0.00581584	0.187261	0.0322985	#N/A	#N/A	#N/A
CAPS2	95.3549	-4.36476	1.58448	-2.75469	0.00587482	0.187351	0.0485374	2.93992	#N/A	6.07e-24
APLP1	4020.73	0.991186	0.359927	2.75385	0.00588981	0.187351	1.98782	#N/A	#N/A	0.12235
PARM1	712.308	-1.81985	0.660448	-2.75547	0.00586078	0.187351	0.283251	#N/A	#N/A	0.000869
NUDT10	337.235	2.93827	1.06657	2.75487	0.00587149	0.187351	7.66493	#N/A	#N/A	0.1065
EFNB1	4356.76	-0.974722	0.353983	-2.75359	0.00589461	0.187351	0.508838	#N/A	#N/A	0.93251
AP5B1	140.126	4.51723	1.64143	2.75201	0.00592313	0.187428	22.8993	#N/A	#N/A	4.27e-11
SPATS2	371.828	2.96373	1.07703	2.75177	0.00592741	0.187428	7.8014	-0.705308	#N/A	0.97239
ATAD2	569.338	-2.23204	0.81455	-2.74021	0.00613993	0.193651	0.212858	#N/A	#N/A	0.9982
RPL31	2097.88	-1.31298	0.479361	-2.73902	0.0061622	0.193858	0.402488	0.314271	#N/A	0.84958
NUCKS1	36293.9	-0.540876	0.197988	-2.73186	0.00629777	0.197619	0.687353	-0.190617	#N/A	0.96937
NTM	1951.61	1.41926	0.520833	2.72498	0.00643049	0.200762	2.67448	1.44355	#N/A	0.057798
ZNF720	339.091	-4.27309	1.56807	-2.72506	0.00642891	0.200762	0.0517216	#N/A	#N/A	0.21673
CD55	653.788	1.8236	0.669816	2.72254	0.00647829	0.201039	3.53963	#N/A	#N/A	5.68e-12
CHCHD4	337.845	-3.37555	1.24008	-2.72205	0.0064878	0.201039	0.0963511	0.179241	#N/A	0.18737
CHMP7	863.063	-1.58355	0.581752	-2.72203	0.00648827	0.201039	0.333661	3.36038	#N/A	0.86301
RHOBTB1	2796.99	-1.09895	0.40455	-2.71647	0.00659828	0.202094	0.466857	#N/A	#N/A	0.00024175
UCN	148.724	-4.27285	1.57357	-2.71539	0.0066197	0.202094	0.05173	#N/A	#N/A	0.44958
EIF5B	2465.71	-1.20668	0.444218	-2.7164	0.00659956	0.202094	0.433266	0.121001	#N/A	0.99981
RPL35P2	734.312	-1.86527	0.686438	-2.71731	0.0065814	0.202094	0.274472	#N/A	#N/A	#N/A
DOPEY1	601.967	-2.1725	0.800454	-2.71408	0.00664595	0.202094	0.221826	#N/A	#N/A	0.99993
RHBDD2	2816.81	1.11952	0.412543	2.71371	0.00665343	0.202094	2.17275	#N/A	#N/A	0.63858
RPS23P8	33869.3	-0.68021	0.250591	-2.71442	0.00663912	0.202094	0.624074	#N/A	#N/A	#N/A
ZCCHC12	1751.28	1.389	0.511612	2.71494	0.00662873	0.202094	2.61897	#N/A	#N/A	0.04647
FBXO11	2189.22	1.05069	0.387451	2.71181	0.00669166	0.202756	2.07153	#N/A	#N/A	1
RPS21	3393.23	-1.00744	0.371638	-2.71081	0.00671183	0.202868	0.497428	0.200547	#N/A	0.1406
ACOT11	55.2032	6.88973	2.54707	2.70497	0.00683112	0.203062	118.581	#N/A	#N/A	1.08e-16
C1orf54	375.236	2.43564	0.90065	2.70431	0.00684457	0.203062	5.41005	#N/A	#N/A	0.0002318
MYH3	18691.8	-3.25985	1.20391	-2.70771	0.0067749	0.203062	0.104397	-4.09907	#N/A	6.72e-21
BZW1	3884.64	-0.969512	0.358551	-2.70397	0.00685165	0.203062	0.510679	0.0600315	#N/A	0.94418
BACE2	3246.32	-1.161	0.429074	-2.70583	0.00681341	0.203062	0.447202	#N/A	#N/A	0.0067632
ASPHD2	1040.16	1.43251	0.528895	2.7085	0.00675884	0.203062	2.69916	#N/A	#N/A	0.45902
C3orf18	59.0883	6.70377	2.47885	2.70438	0.00684314	0.203062	104.24	#N/A	#N/A	0.00066265
OTP	1300.05	1.82769	0.676307	2.70246	0.0068829	0.203062	3.54968	#N/A	#N/A	0.74039
FUT10	71.098	6.61445	2.44721	2.70286	0.00687465	0.203062	97.9825	#N/A	#N/A	5.41e-09
BAALC	3473.88	0.869415	0.321692	2.70264	0.00687922	0.203062	1.82692	#N/A	#N/A	0.0044356
SLC38A7	252.497	3.68601	1.36503	2.70031	0.00692754	0.203251	12.8706	#N/A	#N/A	2.8965e-05
PTPRM	2779.47	1.05632	0.391287	2.69961	0.00694205	0.203251	2.07962	#N/A	#N/A	0.99998
PGLS	3092.94	-1.03955	0.385164	-2.69898	0.00695524	0.203251	0.486479	-0.117588	#N/A	0.00075276
TRIM54	143.101	-4.32652	1.60193	-2.70081	0.00691704	0.203251	0.0498412	#N/A	#N/A	5.51e-18
GNB5	1105.54	1.54484	0.572747	2.69724	0.00699166	0.203832	2.91771	#N/A	#N/A	6.36e-08
CNGA1	63.2826	6.80588	2.52761	2.69262	0.0070893	0.205905	111.886	#N/A	#N/A	2.76e-11
SLC35A1	999.473	-1.5842	0.58842	-2.6923	0.00709613	0.205905	0.333509	2.59309	#N/A	0.68262
RAB3A	70.7056	5.47078	2.03368	2.69009	0.00714338	0.206305	44.3474	0.465243	#N/A	0.9463
DYNLT3	1873.29	1.20361	0.44739	2.69029	0.00713895	0.206305	2.30315	#N/A	#N/A	0.71894
MFSD2B	3855.91	0.982321	0.365542	2.6873	0.00720328	0.207112	1.97564	#N/A	#N/A	6.33e-11
HMOX1	543.601	2.13971	0.796254	2.68722	0.00720492	0.207112	4.40673	1.75903	#N/A	0.0096817
TUB	2107.81	1.11802	0.417087	2.68055	0.0073501	0.210794	2.17049	#N/A	#N/A	0.0031466
FAM46C	37.5516	-7.93899	2.96768	-2.67515	0.00746948	0.212419	0.00407497	#N/A	#N/A	0.94762
TRAF3	1081.73	-1.57774	0.589386	-2.67693	0.00743006	0.212419	0.335005	#N/A	#N/A	0.99869
BNIP2	40.3678	8.71361	3.25626	2.67596	0.00745156	0.212419	419.815	#N/A	#N/A	6.4641e-05
ZNFX1	774.525	-2.4416	0.912788	-2.67488	0.00747566	0.212419	0.18408	#N/A	#N/A	0.99983
FNDC3A	978.309	1.79896	0.672996	2.67307	0.00751609	0.213077	3.4797	4.19206	#N/A	0.99998
AL049775.1	49.1098	6.60419	2.47308	2.67043	0.00757533	0.214264	97.288	#N/A	#N/A	#N/A
CTBS	833.995	1.64626	0.617065	2.66789	0.00763295	0.214454	3.13021	0.0681403	#N/A	1.08e-07
DKK1	493.229	3.73542	1.40049	2.66723	0.00764794	0.214454	13.319	#N/A	#N/A	0.17423
LPCAT3	1037.07	1.67195	0.626897	2.66702	0.00765272	0.214454	3.18645	2.17183	#N/A	0.99508
POC1B	891.653	-1.7534	0.657241	-2.66782	0.00763451	0.214454	0.296602	#N/A	#N/A	3.05e-08
AMER2	174.651	-4.33863	1.62746	-2.6659	0.00767835	0.214454	0.0494245	-0.0974266	#N/A	0.083487
EIF3H	10863.2	-0.582447	0.21851	-2.66554	0.00768638	0.214454	0.66783	-0.174494	#N/A	0.047483
GIT1	2827.49	1.03274	0.388081	2.66114	0.00778755	0.216786	2.04591	0.268862	#N/A	0.99978
MAP3K8	178.696	-5.00661	1.88589	-2.65477	0.00793626	0.219744	0.0311071	#N/A	#N/A	0.96825
JDP2	2382.25	-1.21165	0.456576	-2.65377	0.00795988	0.219744	0.431776	#N/A	#N/A	0.35921
ZNF253	106.62	-5.44762	2.05168	-2.6552	0.00792614	0.219744	0.0229141	#N/A	#N/A	0.0032064
NBEAL1	36775.1	-0.638109	0.240474	-2.65355	0.00796511	0.219744	0.642555	#N/A	#N/A	5.11e-33
COL6A1	66844.4	-0.452272	0.17107	-2.64379	0.00819838	0.225185	0.730891	0.937718	#N/A	0.99995
AC073861.1	139004	-0.560196	0.211893	-2.64377	0.00819883	0.225185	0.67821	#N/A	#N/A	#N/A
IQCB1	1029.82	2.20049	0.833149	2.64118	0.00826182	0.226411	4.59637	#N/A	#N/A	1.36e-12
PRKAG2-AS1	63.0478	5.8569	2.22105	2.63699	0.00836446	0.228715	57.9567	#N/A	#N/A	#N/A
N4BP2L1	365.72	-2.40473	0.912464	-2.63542	0.00840331	0.229269	0.188845	#N/A	#N/A	0.8446
PPIP5K1	79.5686	4.84151	1.8437	2.62597	0.00864027	0.233891	28.6707	#N/A	#N/A	0.0026969
HRH1	159.863	4.33225	1.64987	2.62581	0.00864429	0.233891	20.1436	#N/A	#N/A	1.858e-06
ZNF141	146.474	3.91419	1.49026	2.62652	0.00862634	0.233891	15.076	#N/A	#N/A	0.10393
HMP19	4105.41	0.893001	0.340108	2.62564	0.00864858	0.233891	1.85704	#N/A	#N/A	#N/A
FREM1	93.7809	4.37059	1.66621	2.62307	0.00871407	0.235147	20.6861	#N/A	#N/A	1.57e-52
RSL1D1	2923.29	-0.983605	0.375147	-2.62192	0.00874359	0.235428	0.505714	0.278207	#N/A	5.17e-07
COL4A1	9753.86	0.696317	0.265775	2.61995	0.00879416	0.236051	1.62036	-0.47804	1	1
DOK6	174.702	4.60755	1.75942	2.61879	0.00882417	0.236051	24.3788	#N/A	#N/A	0.15534
IL13RA2	892.308	1.73796	0.663574	2.61909	0.00881656	0.236051	3.33563	#N/A	#N/A	4.02e-07
TMEM30A	5160.48	0.696685	0.266219	2.61696	0.00887165	0.236808	1.62078	3.31137	#N/A	0.0031923
FAM117A	542.407	-2.4105	0.921662	-2.61539	0.0089126	0.237264	0.18809	#N/A	#N/A	5.9668e-05
C19orf60	1719.26	1.41797	0.542281	2.61483	0.00892723	0.237264	2.6721	#N/A	#N/A	0.00037611
RAI14	12959.9	0.55777	0.213426	2.61341	0.00896432	0.237738	1.47199	0.600095	#N/A	0.99122
SSR2	8028.65	-0.633368	0.242684	-2.60985	0.00905827	0.239714	0.644669	#N/A	#N/A	0.21478
CHGA	251.692	2.98108	1.14426	2.60525	0.0091808	0.241726	7.89577	#N/A	#N/A	0.030369
SPHK2	799.93	-1.85017	0.710295	-2.60479	0.00919312	0.241726	0.27736	#N/A	#N/A	1.28e-07
SSR1	5913	0.694169	0.266446	2.60529	0.0091796	0.241726	1.61795	-0.107068	#N/A	0.2706
ALKBH2	465.541	-2.75536	1.0595	-2.60062	0.0093055	0.243642	0.1481	#N/A	#N/A	0.0032745
GAL3ST1	143.674	4.65033	1.78768	2.60133	0.00928641	0.243642	25.1124	#N/A	#N/A	0.66559
FAM26E	476.881	-2.05027	0.789794	-2.59595	0.00943286	0.246407	0.241439	#N/A	#N/A	0.0010205
CSPP1	412.943	-2.31201	0.890849	-2.59529	0.00945107	0.246407	0.201379	#N/A	#N/A	3.26e-29
TANK	1902.01	-1.26553	0.488173	-2.59239	0.00953122	0.247973	0.415945	#N/A	#N/A	0.83828
TMEM219	4743.04	0.809517	0.31261	2.58954	0.00961034	0.248487	1.75262	#N/A	#N/A	8.1671e-05
NIFK	1110.92	-1.65464	0.638635	-2.5909	0.00957248	0.248487	0.317617	0.498071	#N/A	0.00027756
NDUFAF3	10727.8	-0.600475	0.231888	-2.5895	0.00961144	0.248487	0.659537	0.61947	#N/A	0.0052693
SGCE	2447.08	-1.07098	0.413762	-2.58839	0.00964256	0.24877	0.475996	0.615711	#N/A	0.023761
CDKN2D	2793.8	0.919794	0.357605	2.5721	0.0101084	0.260245	1.89185	#N/A	#N/A	0.49473
GLCE	857.883	-2.0804	0.809821	-2.56897	0.0102002	0.261664	0.236448	#N/A	#N/A	0.65444
RAB33B	461.194	2.3973	0.933249	2.56877	0.010206	0.261664	5.26817	0.333249	#N/A	0.67523
EPHX4	37.0769	8.5907	3.34904	2.56512	0.0103139	0.262814	385.53	#N/A	#N/A	1.2908e-05
FGF7	4831.15	-0.989356	0.38567	-2.56529	0.0103089	0.262814	0.503702	#N/A	#N/A	0.77089
CCNJL	71.1747	6.06287	2.36361	2.56509	0.0103148	0.262814	66.8506	#N/A	#N/A	1.27e-07
BRD3	2559.63	-1.17909	0.4598	-2.56435	0.0103369	0.262835	0.441631	1.08348	#N/A	0.97468
GLIPR1	5382.15	0.834692	0.325818	2.56184	0.0104119	0.264198	1.78348	#N/A	#N/A	2.07e-14
CRISPLD1	7739.49	-0.62459	0.243921	-2.56063	0.0104483	0.264576	0.648604	2.45874	#N/A	1.82e-09
NUMBL	1689.94	-1.41835	0.554073	-2.55986	0.0104713	0.264615	0.37414	0.00348103	#N/A	0.99902
SLC6A17	586.433	2.54148	0.993318	2.55858	0.0105101	0.265052	5.82187	#N/A	1	0.50353
HDX	37.727	7.64933	2.99259	2.55609	0.0105856	0.266412	200.76	#N/A	#N/A	0.075851
LOC100506548	1332.21	-1.50072	0.587408	-2.55482	0.0106243	0.26684	0.353377	#N/A	#N/A	#N/A
ARHGAP24	370.639	-3.26718	1.28131	-2.54987	0.0107763	0.270108	0.103868	#N/A	#N/A	3.95e-10
ATG16L2	310.184	-3.00505	1.17967	-2.54736	0.010854	0.271505	0.124563	#N/A	#N/A	4.69e-16
ZNF207	3114.6	-0.815511	0.320356	-2.54564	0.0109076	0.271743	0.568207	-0.343468	#N/A	0.1046
RETREG2	2397.45	1.06762	0.419332	2.546	0.0108966	0.271743	2.09597	0.867176	#N/A	#N/A
MAPK8IP2	862.708	2.18029	0.857058	2.54393	0.0109614	0.272532	4.53246	#N/A	#N/A	0.99997
DDRGK1	2004.29	1.48866	0.585474	2.54266	0.0110013	0.272973	2.80628	-0.203394	#N/A	3.07e-07
CCDC137	889.291	-1.72485	0.678626	-2.54168	0.011032	0.273185	0.302529	#N/A	#N/A	5.91e-07
TNFSF15	75.2899	-5.82207	2.29184	-2.54035	0.0110743	0.273683	0.0176759	#N/A	#N/A	0.0028159
CEP126	35.3492	-7.84888	3.09211	-2.53836	0.0111373	0.27469	0.00433761	#N/A	#N/A	#N/A
SOAT1	1978.88	1.12196	0.442384	2.53616	0.0112076	0.275736	2.17642	0.706249	#N/A	7.36e-10
HMGCR	3819.39	-0.823981	0.325016	-2.5352	0.0112384	0.275736	0.564881	#N/A	#N/A	0.99861
RBMX	1590.29	-1.1771	0.464352	-2.53494	0.0112468	0.275736	0.442238	-0.0100791	#N/A	0.82878
SVEP1	1033.11	-1.79143	0.70719	-2.53317	0.0113038	0.276036	0.288886	#N/A	#N/A	0.99995
DKC1	1049.41	-1.5455	0.60997	-2.53373	0.0112857	0.276036	0.342578	-0.321342	1	0.99916
CARMIL2	1267.3	1.49391	0.590472	2.53003	0.0114054	0.277419	2.81651	#N/A	#N/A	#N/A
AGFG1	2118.53	-1.08308	0.428019	-2.53045	0.0113915	0.277419	0.472019	0.169026	#N/A	0.99276
CARS	1532.31	-1.08216	0.428072	-2.52799	0.0114719	0.278487	0.472321	-0.0403598	#N/A	0.00040314
SYTL3	76.3945	-5.44807	2.15657	-2.52627	0.0115281	0.278887	0.022907	#N/A	#N/A	2.24e-20
AC083967.1	127.651	5.47047	2.16558	2.5261	0.0115336	0.278887	44.338	#N/A	#N/A	#N/A
LSP1	393.424	2.09977	0.831903	2.52406	0.0116009	0.279966	4.28641	#N/A	#N/A	1.472e-06
HLA-DRB1	1012.15	1.58538	0.628392	2.52292	0.0116386	0.280326	3.00087	1.21453	#N/A	0.0010997
IPO7	6672.76	-0.657848	0.261016	-2.52034	0.0117243	0.281356	0.633823	-0.0316853	#N/A	1
NCOA5	1695.19	1.45912	0.578957	2.52026	0.011727	0.281356	2.74941	0.337356	#N/A	0.99926
PAPOLG	760.904	-1.88411	0.74931	-2.51446	0.0119214	0.284913	0.270911	#N/A	#N/A	0.9979
TCP10L	74.7708	-5.66245	2.25147	-2.51499	0.0119034	0.284913	0.0197439	#N/A	#N/A	0.0032979
TIMM9	2174.12	-1.10964	0.441439	-2.51369	0.0119475	0.284983	0.463409	0.51471	#N/A	0.020827
GRIN2B	62.536	5.28961	2.1059	2.51181	0.0120114	0.285405	39.114	#N/A	1	1
AC016739.1	82612.3	-0.419882	0.167124	-2.5124	0.0119912	0.285405	0.747486	#N/A	#N/A	#N/A
FAM120AOS	1459.56	-1.11176	0.44278	-2.51087	0.0120432	0.28561	0.462728	#N/A	#N/A	0.022322
NCOR1	2055.74	-1.2568	0.501061	-2.50828	0.0121322	0.287168	0.418472	#N/A	#N/A	1
C5orf38	483.955	-2.04026	0.813858	-2.50689	0.0121797	0.28774	0.243121	#N/A	#N/A	0.0017218
CPSF6	3188.6	0.849718	0.339427	2.50339	0.012301	0.29005	1.80215	0.238555	#N/A	0.99982
MAMDC4	111.185	-5.58037	2.23085	-2.50145	0.0123685	0.291084	0.0208997	#N/A	#N/A	1.4e-51
HS6ST3	279.845	2.86978	1.1478	2.50025	0.0124104	0.291515	7.30953	#N/A	#N/A	0.99001
TMEM39A	803.924	-1.56923	0.628212	-2.49793	0.0124922	0.292879	0.336989	#N/A	#N/A	0.95467
HMGA2	384.382	3.16152	1.26698	2.49532	0.0125845	0.293089	8.94769	2.19815	#N/A	0.87015
RPL38	6171.16	-0.811174	0.324971	-2.49614	0.0125553	0.293089	0.569918	-0.0487585	#N/A	0.8255
CDS2	1456.64	1.14903	0.46066	2.49432	0.01262	0.293089	2.21765	0.274469	#N/A	6.86e-07
PCYOX1L	760.545	1.90021	0.761706	2.49468	0.0126072	0.293089	3.73268	0.0664245	#N/A	6.56e-11
SIM1	364.367	-3.35103	1.3433	-2.49462	0.0126091	0.293089	0.0980032	#N/A	#N/A	0.99828
FAM13C	364.956	2.81744	1.1308	2.49155	0.0127187	0.293516	7.04909	#N/A	#N/A	5.8127e-05
DSCAML1	35.1381	-7.84278	3.14633	-2.49267	0.0126786	0.293516	0.00435601	#N/A	#N/A	1
CAMKK1	157.025	4.37945	1.7587	2.49017	0.0127684	0.293516	20.8135	#N/A	#N/A	0.00033981
SGCA	286.985	-4.13023	1.65974	-2.48849	0.0128288	0.293516	0.0571052	#N/A	#N/A	0.0027124
MIF4GD	2003.84	1.39479	0.560486	2.48854	0.0128267	0.293516	2.62951	0.0811878	#N/A	6.78e-09
AC003002.3	110.612	-4.39345	1.76373	-2.491	0.0127384	0.293516	0.0475816	#N/A	#N/A	#N/A
PCSK2	130.146	-4.01557	1.61184	-2.4913	0.0127277	0.293516	0.0618292	#N/A	#N/A	0.99853
PGM5	800.072	-2.66478	1.07031	-2.48972	0.0127844	0.293516	0.157697	-2.94112	#N/A	0.00059096
MLXIP	1229.21	1.26746	0.509478	2.48777	0.0128548	0.293566	2.40738	#N/A	#N/A	0.98932
TAF1B	88.3621	4.04148	1.62501	2.48705	0.0128807	0.293613	16.4667	#N/A	#N/A	7.98e-15
PIK3C2B	591.802	2.58754	1.042	2.48325	0.0130188	0.296214	6.01073	#N/A	#N/A	0.99651
EPHB2	2104.54	1.06568	0.431787	2.46807	0.0135845	0.301983	2.09315	2.05102	#N/A	0.99997
G0S2	564.695	-1.94323	0.787489	-2.46763	0.0136011	0.301983	0.260034	#N/A	#N/A	0.37788
MAP10	168.629	5.0337	2.03901	2.4687	0.0135604	0.301983	32.7563	#N/A	#N/A	8.06e-21
FAS	801.8	1.65204	0.667898	2.47349	0.0133802	0.301983	3.14277	0.245888	#N/A	0.8117
ARHGAP42	330.62	3.36557	1.36042	2.47392	0.013364	0.301983	10.3071	#N/A	#N/A	1
ZNF740	963.065	-1.5494	0.627275	-2.47005	0.0135096	0.301983	0.341653	#N/A	#N/A	0.18968
CIITA	35.5339	7.5599	3.05963	2.47085	0.0134791	0.301983	188.694	#N/A	#N/A	1.36e-07
ZFHX3	4367.95	0.812587	0.329704	2.4646	0.0137167	0.301983	1.75636	#N/A	#N/A	1
STXBP4	108.256	3.67435	1.48783	2.4696	0.0135262	0.301983	12.767	#N/A	#N/A	2.52e-14
MRC2	14949.9	-0.659258	0.267304	-2.46633	0.0136506	0.301983	0.633204	-0.00467965	#N/A	0.67472
LINC00665	187.259	3.48548	1.41281	2.46705	0.0136232	0.301983	11.2004	#N/A	#N/A	#N/A
LTBP4	4657.29	-0.884517	0.357501	-2.47417	0.0133548	0.301983	0.541669	-0.319297	#N/A	0.49911
KCNJ14	35.6033	8.5327	3.45572	2.46915	0.0135433	0.301983	370.338	#N/A	#N/A	2.5e-06
FAM126B	407.075	2.32023	0.937417	2.47513	0.0133189	0.301983	4.99411	#N/A	#N/A	0.17863
MLPH	91.6136	4.80447	1.95068	2.46297	0.013779	0.301983	27.944	#N/A	#N/A	4.38e-10
SNX5	3346.49	-0.852841	0.346079	-2.4643	0.0137281	0.301983	0.553693	-0.492325	#N/A	0.001446
PCP4	1340.05	1.4315	0.579231	2.47138	0.0134593	0.301983	2.69727	#N/A	#N/A	0.0021696
RPL32	40982.9	-0.587685	0.238627	-2.46278	0.0137866	0.301983	0.66541	-0.382513	#N/A	0.79962
NACA3P	22904.4	-0.475524	0.193032	-2.46345	0.0137608	0.301983	0.719205	#N/A	#N/A	#N/A
SLC22A3	442.444	-2.48451	1.00817	-2.46439	0.0137248	0.301983	0.178685	#N/A	#N/A	7.77e-10
GDF6	261.081	3.47302	1.40693	2.4685	0.013568	0.301983	11.1041	#N/A	#N/A	0.98833
AC019205.2	2068.35	-1.30757	0.531641	-2.45949	0.0139134	0.303682	0.404002	#N/A	#N/A	#N/A
FZD1	3244.89	-0.875923	0.35606	-2.46004	0.0138921	0.303682	0.544905	0.31397	#N/A	0.042428
PRR19	58.6755	6.33433	2.57675	2.45826	0.0139612	0.304186	80.6909	#N/A	#N/A	0.81244
KLF15	350.38	-2.93073	1.19451	-2.45351	0.014147	0.307691	0.131148	#N/A	#N/A	0.48843
TNNI2	1128.67	-4.92019	2.00697	-2.45155	0.0142243	0.308827	0.0330274	-9.71788	#N/A	0.14351
LTBP3	6254.61	0.675976	0.275859	2.45044	0.0142683	0.309238	1.59768	1.42244	#N/A	0.68647
PCSK1N	1993.61	1.33183	0.544754	2.44483	0.0144921	0.313538	2.51722	3.04934	#N/A	0.53242
DPAGT1	566.468	1.88854	0.773223	2.44243	0.0145887	0.314523	3.70262	#N/A	1	1.117e-05
MRPL52	2783.68	0.917854	0.375727	2.44288	0.0145707	0.314523	1.8893	#N/A	#N/A	2.16e-07
HNRNPR	5438.93	-0.735963	0.301578	-2.44038	0.014672	0.314708	0.600417	-0.0807946	#N/A	0.99935
ENC1	4773.6	0.866843	0.355212	2.44035	0.0146729	0.314708	1.82367	#N/A	#N/A	0.46008
PGM3	2096.92	-1.00049	0.409981	-2.44033	0.0146738	0.314708	0.49983	0.27799	#N/A	1.4641e-05
WWTR1	5763.66	-0.824622	0.338136	-2.43873	0.0147391	0.315192	0.56463	-1.84974	#N/A	0.93914
GARS	3945.74	-0.830388	0.340529	-2.43852	0.0147475	0.315192	0.562378	0.0713919	#N/A	0.3065
AC100814.1	73.0557	-5.09824	2.09186	-2.43718	0.0148023	0.315817	0.0291929	#N/A	#N/A	#N/A
IQCH-AS1	69.3432	-5.70209	2.34108	-2.43567	0.0148643	0.316543	0.0192088	#N/A	#N/A	#N/A
IL4I1	3604.63	-0.824767	0.338992	-2.433	0.0149742	0.316543	0.564573	#N/A	#N/A	0.0039601
IL11	769.135	1.61059	0.661416	2.43506	0.0148891	0.316543	3.05377	#N/A	#N/A	0.00031772
H1FX	8386.96	-0.708149	0.291107	-2.43261	0.0149903	0.316543	0.612105	0.13877	#N/A	0.08771
LRP12	1822.8	1.00714	0.414012	2.43263	0.0149897	0.316543	2.00992	#N/A	#N/A	0.99799
SLC38A5	392.719	-3.10217	1.27445	-2.43413	0.0149278	0.316543	0.116454	#N/A	#N/A	0.97676
RIT2	73.7935	4.50885	1.85465	2.4311	0.0150529	0.316779	22.7666	#N/A	#N/A	0.00063244
SHD	381.264	-3.43967	1.41475	-2.4313	0.0150447	0.316779	0.0921627	#N/A	#N/A	8.36e-06
DDHD1	243.108	3.09029	1.27193	2.42962	0.0151149	0.317541	8.51669	#N/A	#N/A	0.902
KLF11	714.097	-1.77314	0.730274	-2.42804	0.0151807	0.318381	0.292572	#N/A	#N/A	8.32e-09
POMGNT1	1559.45	-1.15517	0.476855	-2.42249	0.0154147	0.320023	0.449012	#N/A	1	1.95e-20
NAXE	1697.46	1.08251	0.446613	2.42381	0.0153585	0.320023	2.11771	-0.682228	#N/A	#N/A
HEG1	2327.08	1.01072	0.417114	2.42312	0.0153877	0.320023	2.01491	#N/A	#N/A	1.89e-07
ABHD18	204.998	-3.03467	1.25261	-2.42269	0.0154062	0.320023	0.122032	#N/A	#N/A	#N/A
DMTF1	771.359	-1.81363	0.747803	-2.42528	0.0152967	0.320023	0.284474	#N/A	#N/A	0.96706
COL15A1	7804.92	-0.742048	0.306205	-2.42337	0.0153773	0.320023	0.59789	0.233182	#N/A	2.54e-08
BAIAP2	2297.23	0.975951	0.403382	2.41942	0.0155452	0.32113	1.96694	2.50537	#N/A	0.46155
PXDN	18715.9	0.503787	0.208228	2.4194	0.0155461	0.32113	1.41793	0.91692	#N/A	2.51e-07
ERCC6L	126.575	4.2116	1.7405	2.41976	0.0155308	0.32113	18.5275	#N/A	#N/A	0.99932
ADA2	948.128	1.90861	0.790355	2.41488	0.0157406	0.322595	3.75447	#N/A	#N/A	#N/A
HADH	710.079	2.27082	0.940324	2.41493	0.0157382	0.322595	4.82596	-0.0384208	#N/A	6.5638e-05
ELOVL5	3946.89	-0.836247	0.346266	-2.41504	0.0157334	0.322595	0.560099	#N/A	#N/A	0.93341
ACTB	20129	0.427446	0.177018	2.41471	0.0157478	0.322595	1.34485	6.07275	1	0.98564
TOMM7	17985.5	-0.534867	0.221492	-2.41484	0.0157423	0.322595	0.690222	#N/A	#N/A	0.0097668
MFN1	1631.99	1.26611	0.525189	2.41077	0.0159188	0.325557	2.40512	-3.60919	#N/A	2.51e-10
NEMF	814.529	2.23009	0.925485	2.40964	0.0159683	0.326028	4.69162	0.583777	#N/A	0.00035788
SERBP1	10250.9	-0.579053	0.240415	-2.40856	0.0160157	0.326456	0.669403	0.0400465	#N/A	0.9995
CRTAP	7625.41	-0.591093	0.245641	-2.40633	0.0161138	0.32768	0.66384	-1.06463	#N/A	0.00055361
ELF2	8896.37	-0.531706	0.220993	-2.40599	0.0161289	0.32768	0.691736	#N/A	#N/A	0.99482
SCAF11	2979.29	-0.98999	0.411968	-2.40308	0.0162578	0.329756	0.503481	0.398697	#N/A	1
DNER	4365.5	0.770593	0.320852	2.40171	0.0163187	0.330448	1.70597	#N/A	#N/A	0.1859
ADGRA1	32.068	8.38116	3.49261	2.39968	0.0164092	0.330651	333.41	#N/A	#N/A	#N/A
CREBL2	943.565	1.44439	0.601896	2.39974	0.0164068	0.330651	2.72148	#N/A	#N/A	0.72167
C1QTNF3-AMACR	516.881	-2.50766	1.04463	-2.40052	0.0163717	0.330651	0.17584	#N/A	#N/A	#N/A
AL049873.1	56696	-0.515361	0.215333	-2.39332	0.0166968	0.332642	0.699618	#N/A	#N/A	#N/A
SLC9A5	120.77	-3.82849	1.59825	-2.39543	0.0166009	0.332642	0.07039	#N/A	#N/A	1.8e-08
CBX8	174.842	3.44351	1.43824	2.39426	0.0166541	0.332642	10.8792	#N/A	#N/A	0.9927
SYT5	387.281	2.46199	1.02856	2.39362	0.0166828	0.332642	5.50977	#N/A	#N/A	0.001902
TCF7L1	1566.68	-1.18515	0.494813	-2.39515	0.0166134	0.332642	0.439778	#N/A	#N/A	0.36022
AGAP1	2888.28	1.09309	0.456287	2.39562	0.0165922	0.332642	2.13331	1.24455	#N/A	0.99984
THBS2	21248.2	-0.486416	0.203124	-2.39467	0.0166351	0.332642	0.713796	0.665635	#N/A	0.55641
FAU	59937.1	-0.398685	0.16671	-2.39148	0.0167804	0.333768	0.75855	0.0110823	#N/A	0.85252
DNAJB4	1946.57	1.07867	0.451355	2.38985	0.0168552	0.334187	2.11209	0.689172	#N/A	0.016227
TMTC1	482.093	-2.48844	1.04169	-2.38885	0.0169014	0.334187	0.178199	#N/A	#N/A	1.33e-09
SREBF2	2753.91	-0.914933	0.383007	-2.38882	0.0169028	0.334187	0.530369	#N/A	#N/A	0.20734
TGFBI	9581.55	0.707468	0.296177	2.38866	0.0169099	0.334187	1.63294	1.23538	#N/A	5.97e-08
RPS24	63489.8	-0.519071	0.217456	-2.38702	0.0169857	0.335147	0.697821	0.391784	#N/A	0.68141
ACD	1288.12	1.40599	0.589459	2.38522	0.0170689	0.336252	2.65	#N/A	#N/A	1.11e-12
SNX7	2038.88	-0.944182	0.396188	-2.38317	0.0171644	0.336359	0.519724	-4.14509	#N/A	3.7323e-05
STX1B	85.3003	5.45005	2.2865	2.38357	0.0171454	0.336359	43.7147	1.3079	#N/A	0.98766
VASP	2192.68	1.04242	0.437557	2.38237	0.0172017	0.336359	2.05968	2.57903	#N/A	0.94665
EDIL3	16028.9	0.45305	0.190075	2.38354	0.0171472	0.336359	1.36893	0.6079	#N/A	0.00014584
ZCCHC7	910.86	-1.5585	0.654234	-2.38217	0.0172107	0.336359	0.339504	#N/A	#N/A	3.86e-09
PREP	341.486	2.95897	1.24304	2.38042	0.0172928	0.337429	7.77568	-0.362092	#N/A	0.08025
NRG1	99.1408	5.03932	2.11845	2.37877	0.0173704	0.338407	32.8841	#N/A	#N/A	0.99665
NHS	276.616	3.51127	1.47663	2.3779	0.0174117	0.338677	11.4025	#N/A	1	0.99999
LHFPL3	20483	-0.594428	0.250114	-2.37663	0.0174718	0.339311	0.662307	#N/A	#N/A	0.93153
RNF141	1879.69	1.06889	0.450278	2.37384	0.017604	0.339854	2.09782	#N/A	#N/A	9.0192e-05
ACSS3	240.341	3.4053	1.43448	2.3739	0.0176013	0.339854	10.5949	1.12626	#N/A	5.05e-13
MUT	2026.73	-1.20731	0.508262	-2.37537	0.0175315	0.339854	0.433076	#N/A	1	1.71e-22
CENPVL3	56.4483	5.73979	2.41806	2.37372	0.01761	0.339854	53.4379	#N/A	#N/A	#N/A
SHROOM2	364.856	2.63956	1.11297	2.37164	0.0177092	0.341234	6.23143	0.788413	#N/A	0.0029403
DKK3	8302.38	0.600266	0.253194	2.37077	0.017751	0.341506	1.516	#N/A	#N/A	4.1e-06
MORF4L1	14867.2	-0.488167	0.20611	-2.36848	0.0178613	0.342026	0.71293	-0.408061	#N/A	0.99339
NCAN	2304.43	-1.54894	0.653689	-2.36953	0.0178105	0.342026	0.341762	0.439185	#N/A	0.068
ID1	9758.2	-0.657822	0.277718	-2.36867	0.0178524	0.342026	0.633834	#N/A	#N/A	0.00031026
ZNF230	116.35	3.72974	1.57555	2.36727	0.0179198	0.342616	13.2668	#N/A	#N/A	0.083152
DPH5	859.373	-1.65481	0.699305	-2.36637	0.0179637	0.342923	0.317579	-3.2961	#N/A	8.11e-07
MAP1A	1395.6	1.64975	0.698367	2.3623	0.0181621	0.346175	3.13779	-0.616438	#N/A	1
LINC01578	5166.54	-0.710101	0.301	-2.35914	0.0183172	0.348593	0.611277	#N/A	#N/A	#N/A
AL133523.1	101.861	4.5498	1.93129	2.35584	0.018481	0.35068	23.4221	#N/A	#N/A	#N/A
CILP2	2840.8	1.17396	0.498333	2.35578	0.0184838	0.35068	2.25631	2.11386	#N/A	8.03e-08
ALX1	324.719	-2.92949	1.24427	-2.35438	0.0185534	0.350921	0.131261	#N/A	1	0.17618
ATP8A2	308.578	3.19592	1.35733	2.35457	0.0185442	0.350921	9.16364	#N/A	1	1.2e-12
PPP1R16A	958.256	1.99941	0.849653	2.35321	0.0186123	0.351497	3.99836	#N/A	#N/A	0.004389
EFNA1	1412.89	-1.19814	0.509292	-2.35256	0.0186445	0.351566	0.435836	#N/A	#N/A	0.46263
UBAP2	972.088	-1.26221	0.53698	-2.35057	0.0187447	0.352916	0.416905	-0.294466	#N/A	3.43e-07
OSBPL1A	979.846	-1.75328	0.746127	-2.34985	0.0187812	0.353063	0.296626	#N/A	#N/A	2.58e-07
NME7	4216.32	0.73032	0.31102	2.34814	0.0188673	0.353363	1.65901	-0.503936	#N/A	4.05e-06
TMEM123	4529.3	-0.804295	0.342467	-2.34854	0.0188474	0.353363	0.572642	#N/A	#N/A	0.64643
MECOM	21363.4	-0.469627	0.200026	-2.34783	0.0188831	0.353363	0.722151	#N/A	#N/A	1
ZNF626	1040.95	-1.43867	0.613476	-2.34512	0.019021	0.3549	0.368906	#N/A	#N/A	0.40889
ADD2	1831	1.57927	0.673439	2.34508	0.0190228	0.3549	2.98819	1.48568	#N/A	0.9961
YTHDF3	4231.04	-0.718206	0.306537	-2.34296	0.0191312	0.356384	0.607853	-0.250431	#N/A	0.99704
ZNF789	106.516	4.69099	2.0032	2.34175	0.0191937	0.357009	25.8302	#N/A	#N/A	2.92e-07
LINC01399	102.248	3.92151	1.67712	2.33824	0.0193747	0.359832	15.1528	#N/A	#N/A	#N/A
RPL37P6	1209.44	-1.35839	0.581518	-2.33593	0.0194947	0.361517	0.390018	#N/A	#N/A	#N/A
SCARB2	9120.22	0.611845	0.262028	2.33504	0.0195413	0.361838	1.52821	-0.47613	#N/A	8.9495e-05
GCC2	54.6229	-5.8724	2.51759	-2.33255	0.0196717	0.363705	0.0170699	0.43813	#N/A	1.9864e-05
IVNS1ABP	4170.41	0.833545	0.357941	2.32872	0.0198738	0.364888	1.78206	2.125	#N/A	0.99442
PLAU	3991.13	0.851488	0.365554	2.32931	0.0198429	0.364888	1.80436	#N/A	#N/A	2.31e-06
SALL1	807.458	-1.51706	0.651329	-2.32917	0.0198499	0.364888	0.349398	#N/A	1	0.99971
ZFP28	93.7035	-4.16764	1.78896	-2.32965	0.0198247	0.364888	0.0556434	#N/A	#N/A	0.00021901
ANOS1	1949.77	0.997251	0.428274	2.32854	0.0198836	0.364888	1.99619	3.43948	#N/A	#N/A
EIF1B	5709.57	-0.599439	0.257532	-2.32763	0.0199319	0.36523	0.660011	#N/A	#N/A	0.50271
RILPL1	527.063	2.60937	1.12219	2.32526	0.0200582	0.366999	6.10238	-0.022843	#N/A	0.38572
TCEANC2	85.8927	4.42561	1.90376	2.32467	0.0200895	0.367028	21.4903	#N/A	#N/A	2.76e-07
SLC1A5	3395.59	-0.79776	0.343303	-2.32378	0.0201373	0.367357	0.575242	0.295302	#N/A	0.16869
TBL1XR1	10344.6	-0.626573	0.26983	-2.3221	0.0202273	0.368454	0.647713	-1.075	#N/A	0.99995
TFAP2A	30.1498	8.29314	3.57411	2.32034	0.0203226	0.369007	313.677	#N/A	1	0.98964
TPMT	519.528	2.35777	1.01633	2.31988	0.0203474	0.369007	5.12577	1.01867	#N/A	7.11e-06
LOC728743	31.142	8.33871	3.59307	2.32078	0.0202989	0.369007	323.744	#N/A	#N/A	#N/A
IKZF5	396.246	-2.0592	0.88801	-2.31889	0.0204009	0.369309	0.239949	#N/A	#N/A	0.7796
USP12	987.807	-1.55424	0.670373	-2.31847	0.020424	0.369309	0.340509	0.0699182	#N/A	0.97053
GAPVD1	915.818	-1.53442	0.662123	-2.31743	0.0204805	0.369789	0.345218	0.452112	#N/A	1
PSAP	68173.9	0.361453	0.156036	2.31648	0.0205322	0.370181	1.28472	0.22744	1	0.99051
ALG10	344.183	-2.63274	1.13694	-2.31564	0.020578	0.370465	0.161238	#N/A	#N/A	1.32e-06
TMSB4XP2	19477.8	0.447191	0.193171	2.315	0.0206131	0.370556	1.36338	#N/A	#N/A	#N/A
SESN2	3082.5	-0.86822	0.375312	-2.31333	0.0207046	0.371036	0.547822	0.368937	#N/A	4.19e-07
RPL3P4	65999.7	-0.470076	0.20315	-2.31393	0.0206714	0.371036	0.721926	#N/A	#N/A	#N/A
PLRG1	1308.2	-1.37127	0.592887	-2.31286	0.0207301	0.371036	0.386552	0.780968	#N/A	0.99911
IGSF9B	30.5734	8.31219	3.60041	2.30868	0.0209613	0.37198	317.848	#N/A	#N/A	0.86551
DCUN1D2	481.882	-3.01128	1.30435	-2.30863	0.0209639	0.37198	0.124027	#N/A	#N/A	2.97e-08
AL122020.1	33310.5	-0.684153	0.296102	-2.31053	0.0208587	0.37198	0.622371	#N/A	#N/A	#N/A
HDAC4	875.85	-1.5108	0.654072	-2.30984	0.020897	0.37198	0.350916	1.56939	1	1
TADA2B	421.027	2.54992	1.10442	2.30883	0.0209531	0.37198	5.85602	#N/A	#N/A	0.72366
PLEKHA8	844.82	-1.9633	0.849952	-2.30989	0.0208942	0.37198	0.256442	#N/A	#N/A	2.18e-09
ATP1B1	5849.5	0.655025	0.283915	2.30712	0.0210483	0.372941	1.57464	0.958345	#N/A	0.99881
AC006504.7	448.944	1.98389	0.860419	2.30572	0.0211261	0.373247	3.95558	#N/A	#N/A	#N/A
RBM5	3019.12	-0.779062	0.337809	-2.30622	0.0210981	0.373247	0.582745	1.19987	#N/A	1
POLR2B	7548.68	0.551014	0.239053	2.30499	0.0211673	0.373441	1.46512	0.629383	#N/A	0.52372
BCL7C	846.976	1.92297	0.834922	2.30317	0.0212694	0.374444	3.79202	-0.243146	#N/A	0.079509
WSB1	8434.49	-0.649573	0.28223	-2.30158	0.0213591	0.374444	0.637469	#N/A	#N/A	0.42292
GTSE1	218.288	-3.3674	1.46309	-2.30157	0.0213593	0.374444	0.0968974	#N/A	#N/A	2.7012e-05
SKIL	3405.31	0.735919	0.319787	2.30128	0.021376	0.374444	1.66546	#N/A	#N/A	0.98512
ELN	25883.7	-0.487761	0.21183	-2.3026	0.0213011	0.374444	0.713131	0.426004	#N/A	2.14e-14
GFRA2	296.745	3.08003	1.33888	2.30045	0.0214229	0.374734	8.45634	#N/A	#N/A	0.097532
CCR7	65.2665	5.23646	2.279	2.29771	0.0215785	0.375326	37.6992	#N/A	#N/A	0.057623
RNF125	47.9583	6.41253	2.79009	2.29832	0.0215435	0.375326	85.1853	#N/A	#N/A	4.6358e-05
LSM1	2181.01	-1.05006	0.456888	-2.29829	0.0215455	0.375326	0.482948	0.318697	#N/A	0.011027
RIC1	515.934	1.87267	0.814885	2.29808	0.021557	0.375326	3.66211	#N/A	#N/A	#N/A
ZNF271P	1807.83	1.09465	0.476815	2.29575	0.0216901	0.376205	2.13561	#N/A	#N/A	#N/A
EDN1	826.37	1.60551	0.699275	2.29597	0.0216777	0.376205	3.04304	#N/A	#N/A	0.45504
RPL11	8660.46	-0.784238	0.341877	-2.29392	0.0217951	0.377496	0.580658	0.218831	#N/A	0.96088
SCD	6444.71	-0.572985	0.250032	-2.29164	0.0219261	0.378102	0.672224	2.48184	#N/A	0.96968
ADPRM	566.409	-1.74819	0.763008	-2.29118	0.0219527	0.378102	0.297675	#N/A	#N/A	0.00039545
MZT2B	14534.2	-0.488475	0.213163	-2.29155	0.0219314	0.378102	0.712778	-0.525386	#N/A	0.061273
COMMD10	1222.53	-1.16101	0.506638	-2.29159	0.0219292	0.378102	0.4472	-0.66124	#N/A	6.48e-12
AC000089.1	9317.06	-0.612696	0.267549	-2.29003	0.0220196	0.378724	0.653974	#N/A	#N/A	#N/A
AC016596.1	65955	-0.50324	0.220162	-2.28577	0.0222676	0.381027	0.705521	#N/A	#N/A	#N/A
UBE2D2	2789.68	-0.878677	0.384258	-2.28668	0.0222144	0.381027	0.543866	0.726364	#N/A	0.96547
TSPYL1	2472.3	0.952797	0.41706	2.28456	0.0223388	0.381027	1.93562	#N/A	#N/A	5.62e-07
MOB3B	76.6981	4.92617	2.1559	2.28497	0.0223147	0.381027	30.4037	#N/A	#N/A	0.016386
CARD19	1466.79	1.10561	0.48368	2.28584	0.0222638	0.381027	2.1519	-2.53493	#N/A	#N/A
ARX	635.319	-2.57442	1.12681	-2.2847	0.0223306	0.381027	0.167889	#N/A	1	0.90814
STARD9	128.136	-4.1642	1.82334	-2.28383	0.0223817	0.38123	0.0557764	1.05736	#N/A	1.03e-38
MKX	1600.45	-1.33498	0.585093	-2.28165	0.0225101	0.382258	0.396399	#N/A	#N/A	0.88427
PPFIA3	324.989	2.79604	1.22567	2.28123	0.022535	0.382258	6.94533	2.0314	#N/A	1
HIST1H2AM	29.7024	8.27063	3.62509	2.2815	0.0225191	0.382258	308.823	#N/A	#N/A	5.45e-07
KIF21B	1606.85	1.28165	0.561975	2.28061	0.0225716	0.382352	2.43116	3.7763	#N/A	1.77e-06
STUB1	3131.89	0.807069	0.354444	2.277	0.0227863	0.384933	1.74965	0.234284	#N/A	0.018667
B4GALT7	1523.18	1.3897	0.61026	2.27722	0.0227729	0.384933	2.62024	#N/A	1	0.00011304
ABHD13	1300.67	-1.11918	0.491691	-2.27619	0.0228348	0.385223	0.460355	#N/A	#N/A	0.8946
BAIAP2L1	15316.5	-0.581742	0.255662	-2.27544	0.0228798	0.385457	0.668156	#N/A	#N/A	0.00010429
APLP2	4444.77	0.703315	0.309732	2.27072	0.0231638	0.387068	1.62824	4.24601	#N/A	0.37966
ADAL	48.6117	-6.43556	2.83228	-2.27221	0.0230736	0.387068	0.0115533	#N/A	#N/A	1.63e-06
MYO1E	821.242	-1.4426	0.63489	-2.27221	0.023074	0.387068	0.367903	-0.185479	#N/A	6.769e-05
ANKRD27	459.881	-1.98789	0.875338	-2.271	0.0231471	0.387068	0.252107	#N/A	#N/A	3.86e-31
RIOX2	1089.85	-1.71102	0.753471	-2.27085	0.0231561	0.387068	0.305444	#N/A	#N/A	#N/A
ZXDC	1076.29	-1.25799	0.553434	-2.27306	0.0230227	0.387068	0.418127	#N/A	#N/A	1.14e-09
HNRNPA3P5	5809.07	0.622531	0.274218	2.2702	0.0231955	0.387073	1.53957	#N/A	#N/A	#N/A
YAP1	3015.41	-0.756705	0.333604	-2.26827	0.0233125	0.387812	0.591847	-0.0189148	1	0.99918
PTHLH	130.497	4.822	2.12618	2.26792	0.0233342	0.387812	28.2857	#N/A	#N/A	0.81146
TFAP4	29.7838	8.27437	3.64818	2.26808	0.0233245	0.387812	309.622	#N/A	#N/A	0.99731
MRPS5	2502.5	-0.924465	0.407784	-2.26705	0.0233874	0.388174	0.526876	1.29771	#N/A	0.00036306
LOC646030	9918.75	-0.558379	0.24642	-2.26596	0.0234536	0.388227	0.679065	#N/A	#N/A	#N/A
CBX7	70.0361	4.46738	1.97143	2.26606	0.0234476	0.388227	22.1216	#N/A	#N/A	0.68534
SCO2	609.519	1.55875	0.688491	2.26401	0.0235733	0.389687	2.94599	#N/A	1	7.55e-07
IPP	121.621	-4.09982	1.81293	-2.26143	0.0237326	0.390718	0.0583218	#N/A	#N/A	2.0966e-05
KCTD2	2964.51	-0.955789	0.422738	-2.26095	0.0237624	0.390718	0.51556	#N/A	#N/A	0.20119
MYH9	20659.7	0.554436	0.245136	2.26175	0.023713	0.390718	1.46859	0.459447	1	1
LRRN3	1042.73	1.31948	0.583542	2.26116	0.0237496	0.390718	2.49576	#N/A	#N/A	0.032413
HES6	2761.09	-0.915843	0.405278	-2.25979	0.0238343	0.391377	0.530034	#N/A	#N/A	0.083905
CLTB	5142.13	0.650325	0.287891	2.25892	0.0238881	0.391739	1.56952	0.426979	#N/A	0.33443
CNOT2	1817.22	1.15555	0.51191	2.25733	0.0239872	0.392722	2.2277	1.79042	#N/A	0.99981
IGDCC3	173.093	3.03794	1.34604	2.25694	0.0240117	0.392722	8.21317	#N/A	#N/A	2.73e-07
FEM1C	869.941	1.24016	0.549623	2.25639	0.0240464	0.392768	2.36225	#N/A	#N/A	0.62927
ARPC1B	2335.8	0.957283	0.425475	2.24991	0.0244544	0.398905	1.94165	0.47105	#N/A	0.010999
MCRIP2	342.507	2.08932	0.929616	2.24751	0.0246073	0.400868	4.25548	#N/A	#N/A	#N/A
NAP1L1	31389.2	-0.376199	0.167472	-2.24633	0.0246827	0.401037	0.770465	-0.452163	#N/A	0.99941
KPNB1	8852.53	-0.514731	0.22913	-2.24646	0.0246747	0.401037	0.699923	-0.128915	#N/A	1
ZYG11B	4133.28	-0.947603	0.422261	-2.24412	0.0248248	0.402704	0.518493	#N/A	#N/A	0.99836
PLPPR2	1710.49	1.01773	0.453592	2.24372	0.0248506	0.402704	2.02473	#N/A	#N/A	#N/A
SLC7A1	2168.43	-1.05129	0.468796	-2.24254	0.0249266	0.403405	0.482535	#N/A	#N/A	0.99291
QPCTL	38.7023	-6.25905	2.79587	-2.23868	0.025177	0.406715	0.0130569	#N/A	#N/A	1.57e-08
ELOVL6	1615.15	1.14147	0.509956	2.23837	0.0251971	0.406715	2.20606	#N/A	#N/A	0.96581
KLHL17	179	-3.99875	1.78878	-2.23546	0.025387	0.408711	0.062554	#N/A	#N/A	1.31e-16
CMSS1	1029.66	-1.20594	0.539392	-2.23575	0.0253684	0.408711	0.433486	#N/A	#N/A	0.0011173
SERGEF	115.764	3.27938	1.46936	2.23185	0.0256247	0.408802	9.70942	#N/A	#N/A	5.29e-14
PROCA1	28.946	8.23319	3.68682	2.23314	0.0255397	0.408802	300.911	#N/A	#N/A	4.46e-08
SAMD14	1758.79	1.21791	0.545455	2.23284	0.0255596	0.408802	2.3261	#N/A	#N/A	0.00073677
SERTAD3	2182.15	-0.913807	0.409372	-2.23222	0.0256007	0.408802	0.530783	#N/A	#N/A	0.018142
LINC00461	1211.12	-1.57186	0.704011	-2.23272	0.0255672	0.408802	0.336374	#N/A	#N/A	#N/A
TFPI2	20102.3	-0.430564	0.192773	-2.23353	0.0255143	0.408802	0.741972	#N/A	#N/A	0.00084274
GPKOW	83.6263	-3.91843	1.75421	-2.23373	0.0255009	0.408802	0.0661357	-0.221145	#N/A	0.99553
ANKS1B	486.534	1.8279	0.819203	2.23132	0.0256601	0.408838	3.5502	-0.538421	#N/A	0.99998
MID1IP1	1961.4	-1.15826	0.519471	-2.22969	0.0257679	0.410025	0.448052	#N/A	#N/A	0.57733
TRPV2	191.481	3.93539	1.76561	2.22892	0.0258195	0.410317	15.2992	#N/A	#N/A	7.92e-13
SHISA6	32.5035	7.43362	3.33695	2.22767	0.0259025	0.411107	172.879	#N/A	#N/A	0.85318
GALNT2	7277.02	0.574783	0.25825	2.22569	0.0260352	0.41219	1.48945	0.69669	#N/A	0.0084175
TMEM216	1180.28	-1.35909	0.611033	-2.22426	0.0261312	0.41219	0.389827	#N/A	#N/A	0.0018855
RSL24D1	5670.39	-0.697276	0.313637	-2.22319	0.026203	0.41219	0.616736	#N/A	#N/A	0.87838
TCF4	18945.6	-0.606229	0.272618	-2.22373	0.0261666	0.41219	0.656912	-1.38616	1	0.99981
IFT172	762.569	1.36094	0.612301	2.22267	0.0262381	0.41219	2.56853	#N/A	1	3.27e-33
AC009299.2	9648.08	0.528246	0.237644	2.22284	0.0262263	0.41219	1.44217	#N/A	#N/A	#N/A
HMGA1	8299.8	0.534696	0.240386	2.22432	0.0261268	0.41219	1.44864	1.06544	#N/A	0.83209
FIBCD1	279.016	3.02938	1.36261	2.22322	0.0262013	0.41219	8.1646	#N/A	#N/A	1.94e-14
STYX	1223.58	1.14718	0.517113	2.21842	0.0265259	0.415124	2.2148	#N/A	#N/A	0.37747
CACNG8	74.0535	5.38853	2.42886	2.21854	0.0265178	0.415124	41.8897	#N/A	#N/A	0.9638
CCND3	1464.12	1.25829	0.567139	2.21866	0.0265099	0.415124	2.39212	#N/A	#N/A	0.98347
ANKRD18CP	734.373	-1.85229	0.835377	-2.21731	0.0266019	0.415785	0.276953	#N/A	#N/A	#N/A
RARA	5391.43	-0.699634	0.315703	-2.21611	0.0266839	0.416539	0.615729	#N/A	#N/A	0.96305
GREM1	7059.26	0.564081	0.254611	2.21546	0.0267284	0.416707	1.47845	2.00535	#N/A	0.47436
GTF2H2	103.657	-4.50977	2.03624	-2.21475	0.0267771	0.416939	0.0438959	#N/A	#N/A	0.015519
ST8SIA4	820.015	1.75655	0.79358	2.21345	0.0268668	0.417797	3.37889	#N/A	#N/A	0.00040145
PXDC1	2630.36	-0.858998	0.388166	-2.21297	0.0269	0.417797	0.551335	#N/A	#N/A	0.0043291
STAU1	2883.25	0.925498	0.418763	2.21007	0.0271001	0.418536	1.89934	0.309243	#N/A	0.99976
LEF1	939.396	1.26385	0.571779	2.21038	0.0270791	0.418536	2.40135	#N/A	#N/A	0.99789
RACK1	72825.7	-0.436561	0.197473	-2.21074	0.0270538	0.418536	0.738894	0.0365955	#N/A	#N/A
RPL21P75	10737.5	-0.742406	0.335808	-2.2108	0.0270493	0.418536	0.597742	#N/A	#N/A	#N/A
ZNF674-AS1	62.2744	4.48634	2.03018	2.20983	0.0271173	0.418536	22.4143	#N/A	#N/A	#N/A
GNG3	772.752	2.11498	0.957352	2.2092	0.0271609	0.418686	4.33184	#N/A	#N/A	0.54217
SARS	4591.19	-0.649002	0.294004	-2.20746	0.027282	0.420027	0.637721	0.176951	#N/A	0.99925
RPL5	55448.7	-0.473765	0.214748	-2.20614	0.0273741	0.420395	0.720083	0.0116805	#N/A	0.99776
AHNAK	4370.81	-0.84715	0.383934	-2.2065	0.027349	0.420395	0.555882	-0.617795	#N/A	0.89827
MSH6	1893.35	0.959716	0.435176	2.20535	0.0274293	0.420718	1.94493	0.85821	#N/A	3.6705e-05
LCA5	280.878	2.7756	1.25907	2.20449	0.0274901	0.421128	6.84759	#N/A	#N/A	4.0606e-05
SOX9	3755.08	-0.982666	0.445911	-2.20373	0.0275436	0.421424	0.506044	#N/A	#N/A	0.99772
MALT1	57.3621	5.70552	2.58999	2.20291	0.0276012	0.421783	52.1833	-0.354359	#N/A	0.98651
IQGAP2	1066.78	-1.2456	0.565868	-2.20121	0.027721	0.422575	0.421734	0.619608	#N/A	8.5e-27
AQP1	1089.77	-1.4771	0.67104	-2.2012	0.0277217	0.422575	0.359211	-0.657431	#N/A	0.093302
GSTO1	4301.35	0.691838	0.314393	2.20055	0.0277679	0.42263	1.61534	-0.0924077	#N/A	5.09e-09
PTRH1	840.014	1.37184	0.623511	2.20018	0.0277938	0.42263	2.588	#N/A	#N/A	0.00016798
SNX5P1	55.7829	-5.14055	2.33787	-2.19882	0.0278908	0.423583	0.0283492	#N/A	#N/A	#N/A
CHMP1A	3999.45	0.792791	0.360946	2.19642	0.0280617	0.425655	1.73242	0.0340872	#N/A	0.00028502
NUMA1	7871.83	-0.569256	0.259681	-2.19214	0.0283697	0.425855	0.673964	-0.248223	#N/A	1
GUCY1A2	369.141	2.23887	1.02064	2.19358	0.0282656	0.425855	4.72026	#N/A	#N/A	0.31409
AC084757.3	67.6235	5.52321	2.51689	2.19446	0.0282027	0.425855	45.9886	#N/A	#N/A	#N/A
SEZ6	2500.3	0.815223	0.371684	2.19332	0.0282843	0.425855	1.75957	#N/A	#N/A	1.75e-06
MMD	682.063	1.64286	0.749508	2.19191	0.0283857	0.425855	3.12284	#N/A	#N/A	0.0001344
MISP3	111.363	4.25087	1.93846	2.19291	0.028314	0.425855	19.0388	#N/A	#N/A	#N/A
FGFBP2	583.475	-2.49164	1.13559	-2.19414	0.0282253	0.425855	0.177804	#N/A	#N/A	0.0038934
FRMD3	181.236	3.47239	1.58303	2.1935	0.0282711	0.425855	11.0993	#N/A	#N/A	0.27023
ZBTB6	673.667	-1.53804	0.701563	-2.1923	0.0283579	0.425855	0.344354	#N/A	#N/A	0.13693
RSRC2	1617.92	-0.94766	0.4326	-2.19062	0.0284795	0.425871	0.518473	2.93915	#N/A	0.99905
NAA30	1312.17	-1.09329	0.498913	-2.19134	0.0284274	0.425871	0.468692	0.848597	#N/A	0.98682
RPL19	28104.5	-0.484702	0.221374	-2.18951	0.0285594	0.425871	0.714644	-0.525581	#N/A	0.98197
FAM107A	292.991	-2.81737	1.28633	-2.19024	0.0285067	0.425871	0.141869	#N/A	#N/A	8.28e-07
ADGRA3	1632.45	-0.969635	0.442804	-2.18976	0.0285415	0.425871	0.510635	#N/A	#N/A	#N/A
EIF3L	9748.89	-0.620453	0.283515	-2.18843	0.0286383	0.426016	0.650467	-0.232253	#N/A	0.83781
SERP1	6523.58	0.545871	0.249429	2.18848	0.0286344	0.426016	1.4599	#N/A	#N/A	0.26523
NPAT	227.073	-3.60693	1.64886	-2.18753	0.0287037	0.426475	0.0820739	#N/A	#N/A	0.28233
ATP6V1D	2995.89	0.829906	0.379676	2.18583	0.0288281	0.427807	1.77757	1.30497	#N/A	4.5061e-05
MMP2	10537	0.591932	0.270969	2.1845	0.0289254	0.428736	1.50726	0.421406	#N/A	0.83878
SMIM12	1023.99	-1.52197	0.700099	-2.17393	0.0297102	0.42886	0.348211	#N/A	#N/A	0.56679
GPBP1L1	1033.17	-1.29131	0.591694	-2.1824	0.0290801	0.42886	0.408579	#N/A	#N/A	0.19902
NFIA	2572.62	-0.9757	0.448317	-2.17636	0.0295282	0.42886	0.508493	#N/A	1	0.99959
PHGDH	2303.53	-0.937353	0.430261	-2.17857	0.0293638	0.42886	0.52219	0.168373	1	0.00013308
HNRNPU	10579.2	-0.493002	0.226008	-2.18134	0.0291579	0.42886	0.710545	0.0665661	#N/A	1
CD59	9381.49	0.588866	0.270058	2.18051	0.0292194	0.42886	1.50406	-0.108797	#N/A	0.60568
TULP3	693.975	-1.47582	0.678133	-2.17631	0.0295324	0.42886	0.359528	#N/A	#N/A	1.75e-06
LMO7	1218.7	1.5544	0.712066	2.18295	0.0290397	0.42886	2.93712	0.310415	#N/A	0.00024661
CACNA1H	487.511	-1.74227	0.801182	-2.17463	0.0296582	0.42886	0.298899	#N/A	#N/A	4.78e-10
CREBBP	1433.56	-1.18975	0.547153	-2.17445	0.0296716	0.42886	0.438377	1.04184	1	1
FOXC2	557.994	1.84196	0.843589	2.18347	0.0290009	0.42886	3.58496	#N/A	#N/A	0.13356
PSPN	226.94	-2.77394	1.27587	-2.17415	0.0296941	0.42886	0.146205	#N/A	#N/A	0.00011172
SYDE1	2194.79	1.0349	0.475233	2.17767	0.0294305	0.42886	2.04897	#N/A	#N/A	0.7662
RRM2	1192.79	-1.13929	0.524142	-2.17362	0.0297337	0.42886	0.453984	-0.456028	#N/A	0.74515
BHLHE40	2314.67	-0.905537	0.416003	-2.17676	0.0294988	0.42886	0.533834	#N/A	#N/A	0.99444
CRYBG3	341.879	-2.93412	1.34947	-2.17428	0.0296845	0.42886	0.13084	#N/A	#N/A	9.2709e-05
KLHL24	2443.78	-0.978588	0.449013	-2.17942	0.0293004	0.42886	0.507476	#N/A	#N/A	0.0016745
SLAIN2	1598.97	-1.10062	0.505983	-2.1752	0.029615	0.42886	0.466317	0.717306	#N/A	0.79312
KDM3B	2240.21	-0.890366	0.409622	-2.17363	0.0297333	0.42886	0.539477	-1.45425	#N/A	1
ID4	8612.1	-0.636365	0.292058	-2.1789	0.0293391	0.42886	0.643332	#N/A	#N/A	0.031243
SAMD9	41.2909	6.24145	2.85999	2.18233	0.029085	0.42886	75.6593	#N/A	#N/A	1.05e-33
TSC1	753.969	-1.41189	0.649457	-2.17395	0.0297086	0.42886	0.375819	0.216382	1	1
APOO	12582.2	-0.630388	0.289842	-2.17494	0.0296349	0.42886	0.646002	0.636028	#N/A	0.60201
CPEB2	1593.12	0.939893	0.432839	2.17146	0.0298963	0.430703	1.91839	-2.85471	#N/A	0.00013675
TNK1	3072.54	0.775805	0.357737	2.16864	0.0301099	0.43321	1.71214	#N/A	#N/A	2.64e-08
ZIC1	2996.29	-0.890192	0.410648	-2.16778	0.0301758	0.43321	0.539542	#N/A	#N/A	0.93378
SLC39A14	1049.8	1.23279	0.568624	2.16802	0.030157	0.43321	2.35021	#N/A	#N/A	0.15001
IGFBP3	14907.4	0.65973	0.30475	2.16482	0.0304016	0.435944	1.57979	2.2661	#N/A	0.91029
FAM83D	220.92	-2.33413	1.07915	-2.16294	0.0305461	0.437508	0.198316	#N/A	#N/A	3.13e-08
SLC10A7	81.7114	3.69115	1.70946	2.15925	0.0308308	0.441074	12.9165	#N/A	#N/A	1.9761e-05
USP1	951.249	-1.34849	0.624961	-2.15773	0.0309492	0.441469	0.392702	#N/A	#N/A	0.99691
AMBRA1	54916.2	-0.366465	0.169892	-2.15705	0.0310016	0.441469	0.775681	#N/A	#N/A	1
CADPS	1165.59	1.3764	0.638017	2.15731	0.0309812	0.441469	2.5962	1.57144	#N/A	1.4707e-05
TSC22D3	10008.4	-0.524917	0.243274	-2.15772	0.0309495	0.441469	0.694999	-3.41515	#N/A	0.4339
HSPA9	9438.06	-0.516309	0.239607	-2.15482	0.0311758	0.442926	0.699158	0.185648	#N/A	0.96852
ZNF395	3069.76	-0.870178	0.403766	-2.15515	0.0311499	0.442926	0.547079	#N/A	#N/A	0.30888
SPOCK2	1894.21	0.91092	0.422957	2.15369	0.0312644	0.443674	1.88024	#N/A	#N/A	0.24144
THBS4	1026.25	-1.29973	0.60411	-2.15147	0.0314389	0.445638	0.406203	-0.847425	#N/A	1.51e-18
C15orf57	842.797	1.43705	0.669206	2.1474	0.0317615	0.448458	2.70767	#N/A	#N/A	0.3877
MIEF2	296.522	2.42153	1.12748	2.14775	0.0317339	0.448458	5.3574	#N/A	#N/A	0.016043
MTIF2	27662.2	-0.445796	0.207669	-2.14667	0.0318197	0.448458	0.734179	#N/A	#N/A	3.75e-10
RPL29	26296.9	-0.612974	0.2855	-2.14702	0.0317918	0.448458	0.653847	-0.260136	#N/A	0.19534
NXPE3	1047.63	-1.58844	0.739936	-2.14673	0.0318149	0.448458	0.332531	#N/A	#N/A	0.013439
PLK3	849.451	1.61046	0.750768	2.14509	0.031946	0.449229	3.05349	#N/A	#N/A	1.85e-06
HIVEP1	1385.29	1.02374	0.477254	2.14507	0.0319473	0.449229	2.03319	#N/A	#N/A	1
ANKH	7580.89	0.527144	0.2458	2.14461	0.0319843	0.449237	1.44107	#N/A	1	0.27856
HMGB1	14208.5	-0.5287	0.24689	-2.14144	0.0322384	0.450693	0.693179	0.24092	#N/A	0.82035
SETD6	195.866	4.03709	1.88525	2.1414	0.0322415	0.450693	16.4167	#N/A	#N/A	1.84e-18
CBFB	3273.2	0.710022	0.331433	2.14228	0.0321709	0.450693	1.63583	0.252331	#N/A	0.9589
TXNL4B	619.455	-1.93507	0.903446	-2.14188	0.0322033	0.450693	0.261508	#N/A	#N/A	0.0043549
AKR1B1	3845.26	0.641172	0.299467	2.14104	0.0322707	0.450693	1.5596	-0.150557	#N/A	2.0216e-05
RASGRP3	59.9366	4.20025	1.96411	2.1385	0.0324758	0.453045	18.3824	#N/A	#N/A	0.0091132
BICD2	1106.38	-1.35149	0.632419	-2.13701	0.0325969	0.45422	0.391887	0.80108	#N/A	0.98272
MKRN1	1172.16	-1.06064	0.496425	-2.13655	0.0326345	0.454231	0.47942	#N/A	#N/A	0.99421
TMEM136	295.378	2.40907	1.12932	2.1332	0.0329084	0.454375	5.31131	#N/A	#N/A	0.0050232
AC024270.3	29.4766	6.50012	3.04636	2.13373	0.0328646	0.454375	90.5169	#N/A	#N/A	#N/A
AARS	2751.54	-0.880977	0.412601	-2.13518	0.0327463	0.454375	0.542999	0.00082712	#N/A	1.82e-08
AC138207.2	36.5631	6.65655	3.12018	2.13339	0.0328929	0.454375	100.883	#N/A	#N/A	#N/A
NUDT19	34.3996	5.72853	2.6859	2.13282	0.0329396	0.454375	53.0226	#N/A	#N/A	2.97e-15
BCL2L13	2132.34	0.85961	0.402746	2.13437	0.0328126	0.454375	1.81455	-0.299388	#N/A	0.0024411
ZFAND1	674.508	-1.51903	0.711922	-2.1337	0.0328669	0.454375	0.34892	#N/A	#N/A	4.93e-08
HSDL2	888.378	-1.37289	0.643143	-2.13466	0.032789	0.454375	0.386117	-0.256289	#N/A	5.1377e-05
RPS29	21930.4	-0.512448	0.240364	-2.13197	0.0330094	0.454778	0.701032	0.904011	#N/A	0.29053
BASP1	35877.9	0.371067	0.174082	2.13157	0.0330425	0.454778	1.29331	0.9086	#N/A	0.69168
RSPO2	697.882	-2.30149	1.08012	-2.13077	0.0331082	0.455173	0.202854	#N/A	#N/A	0.024608
ASPH	2911.84	-0.774606	0.36383	-2.12903	0.0332516	0.456636	0.584548	0.334872	#N/A	6.63e-15
SRRD	1818.35	0.921559	0.433076	2.12794	0.0333423	0.457372	1.89416	#N/A	#N/A	1.8e-08
BLCAP	6012.2	-0.629944	0.296175	-2.12693	0.033426	0.457826	0.646202	#N/A	#N/A	0.50953
AC133134.1	11120.8	-0.699399	0.328874	-2.12664	0.0334497	0.457826	0.615829	#N/A	#N/A	#N/A
ATL1	1769.07	1.07532	0.505946	2.12537	0.0335555	0.458258	2.1072	1.06315	#N/A	0.98109
RBMS3	700.509	-2.06757	0.972724	-2.12555	0.033541	0.458258	0.238561	#N/A	#N/A	0.2128
CRKL	2196.74	-0.914211	0.43052	-2.1235	0.0337119	0.459393	0.530634	0.463814	#N/A	0.44604
OARD1	527.127	-1.9306	0.909164	-2.12349	0.0337131	0.459393	0.262321	#N/A	#N/A	0.0005506
GATD1	950.517	-1.29579	0.610491	-2.12253	0.0337931	0.45945	0.407314	#N/A	#N/A	#N/A
H3F3C	30.8434	6.71279	3.16327	2.1221	0.0338291	0.45945	104.894	#N/A	#N/A	NA
PTPRN	2407.2	0.94485	0.445144	2.12257	0.03379	0.45945	1.92499	#N/A	#N/A	7.96e-07
LOC643339	12481.4	-0.456732	0.215348	-2.1209	0.0339305	0.460037	0.728635	#N/A	#N/A	#N/A
METTL3	585.779	1.76851	0.833926	2.1207	0.0339469	0.460037	3.40702	-0.910252	#N/A	1.8e-07
VPS41	2881.29	0.732353	0.345443	2.12004	0.0340029	0.46029	1.66135	-0.083924	#N/A	4.42e-18
NRGN	164.386	3.59057	1.69443	2.11905	0.0340863	0.460882	12.0467	#N/A	#N/A	0.4819
DACT1	2050.03	-0.946627	0.44681	-2.11863	0.0341214	0.460882	0.518844	#N/A	#N/A	0.40017
TMEM201	764.866	-1.61415	0.762663	-2.11647	0.0343049	0.461498	0.326657	1.40171	#N/A	0.99004
MPPE1	609.022	-1.55313	0.733548	-2.11728	0.0342358	0.461498	0.34077	#N/A	#N/A	1.22e-09
TACC3	623.055	-1.86802	0.8826	-2.1165	0.0343026	0.461498	0.273949	#N/A	#N/A	2.71e-07
CD74	1391.28	0.944103	0.446104	2.11633	0.0343167	0.461498	1.92399	6.47632	#N/A	0.24889
ZFAND3	3731.11	-0.747992	0.353512	-2.11589	0.0343544	0.461502	0.595432	#N/A	#N/A	0.92174
C14orf119	1662.9	-0.910641	0.430636	-2.11464	0.0344604	0.46192	0.531949	#N/A	#N/A	0.0062891
WNT5A	1720	0.96127	0.454522	2.1149	0.0344382	0.46192	1.94702	#N/A	#N/A	0.98732
UQCR10	9911.56	0.478149	0.226189	2.11394	0.0345204	0.462156	1.39296	0.925646	#N/A	0.14162
TGFBR2	1833.81	-1.17073	0.55403	-2.11312	0.0345903	0.462156	0.444196	#N/A	1	0.12535
MLLT3	984.965	-1.56861	0.74232	-2.11312	0.0345905	0.462156	0.337133	#N/A	#N/A	0.99964
KIAA0232	1929.92	-0.860066	0.407125	-2.11253	0.0346407	0.462325	0.550927	#N/A	#N/A	0.99999
ADAMTS7	1289.35	-1.09034	0.516326	-2.11173	0.03471	0.46275	0.469651	#N/A	#N/A	2.25e-14
SDF2L1	3090.79	0.800687	0.379263	2.11117	0.034758	0.46289	1.74193	#N/A	#N/A	0.18957
CCDC80	6870.48	0.74956	0.355202	2.11023	0.0348382	0.463457	1.68128	1.8982	#N/A	6e-06
GNB1	10479.9	0.481512	0.228344	2.10871	0.0349697	0.463914	1.39621	0.552846	#N/A	0.9992
AQP4	1810.33	-0.961682	0.456092	-2.10853	0.0349854	0.463914	0.513458	0.495396	#N/A	0.0022919
ARL6IP6	858.204	-1.26188	0.598429	-2.10865	0.0349748	0.463914	0.417001	#N/A	#N/A	0.018099
NOTCH2	4352.51	-0.630904	0.299322	-2.10778	0.0350504	0.464276	0.645771	-0.814481	#N/A	1
EIF3A	4432.26	-0.659227	0.3129	-2.10683	0.0351325	0.464865	0.633217	-0.0908343	#N/A	1
ZMYND11	3214.27	-0.746772	0.354941	-2.10393	0.0353845	0.466697	0.595936	#N/A	1	1
FAM86EP	35.6542	5.78206	2.74766	2.10436	0.0353471	0.466697	55.0267	#N/A	#N/A	#N/A
MECP2	645.163	1.80988	0.859944	2.10465	0.0353216	0.466697	3.50614	0.461956	1	0.89382
RPS2	53110.2	-0.455315	0.216682	-2.10131	0.035614	0.467184	0.729351	-0.132914	#N/A	0.8469
ENDOV	241.177	-2.33987	1.11295	-2.1024	0.0355185	0.467184	0.197529	#N/A	#N/A	1.01e-09
URI1	2537.2	-0.868539	0.413383	-2.10105	0.0356364	0.467184	0.547701	0.384156	#N/A	1.1089e-05
CENPC	480.085	2.12847	1.01312	2.10091	0.0356487	0.467184	4.37253	-1.05637	#N/A	7.3778e-05
ZNF354C	697.979	-1.73231	0.824354	-2.10141	0.0356047	0.467184	0.30097	#N/A	#N/A	4.11e-10
CDKN2A	822.172	1.54786	0.736525	2.10157	0.0355906	0.467184	2.92383	2.83087	#N/A	0.39474
MNS1	140.916	2.84851	1.35658	2.09977	0.0357494	0.468006	7.20256	#N/A	#N/A	2.1e-21
RPS3	26045.2	-0.590637	0.28135	-2.09929	0.0357909	0.468053	0.664049	-0.194992	#N/A	0.92
BAX	964.525	1.10048	0.524609	2.09771	0.0359307	0.46903	2.14426	0.116551	#N/A	0.31746
STOML2	10339.3	-0.457572	0.218142	-2.09759	0.0359417	0.46903	0.728211	0.206768	#N/A	0.0024144
DCAF13	2219.86	0.843917	0.402466	2.09687	0.0360054	0.469365	1.79492	#N/A	#N/A	8.94e-10
DMD	1346.62	-1.12319	0.536514	-2.0935	0.0363041	0.472759	0.459076	-2.74669	1	1
RAB6A	6655.73	0.595335	0.284513	2.09247	0.0363962	0.473458	1.51082	0.195491	#N/A	0.95237
GLG1	3719.35	0.753445	0.360324	2.09102	0.0365262	0.474648	1.68581	-0.156454	#N/A	1
ZNF12	385.413	-1.86454	0.892062	-2.09015	0.0366045	0.475164	0.27461	#N/A	#N/A	0.039662
SNF8	2188.31	0.966227	0.462693	2.08827	0.0367736	0.476139	1.95373	-0.0413086	#N/A	0.00045727
MEMO1	1352.6	-1.06978	0.512326	-2.08808	0.0367906	0.476139	0.476393	1.02377	#N/A	0.9939
TTC3	4835.42	-0.695216	0.333199	-2.08649	0.0369345	0.476139	0.617617	#N/A	#N/A	1.63e-40
RPL14	10364.7	-0.575921	0.276047	-2.08632	0.0369498	0.476139	0.670858	-0.484195	#N/A	0.89508
SLC4A4	24.3308	-7.31108	3.50294	-2.08713	0.0368767	0.476139	0.00629717	#N/A	1	0.99722
SLC25A27	277.747	-2.92979	1.40412	-2.08656	0.0369277	0.476139	0.131234	#N/A	#N/A	0.00026907
TUBE1	812.397	-1.49947	0.718135	-2.08801	0.0367967	0.476139	0.353682	#N/A	#N/A	0.026894
TRIB1	386.134	1.92912	0.925462	2.0845	0.037115	0.477769	3.80823	#N/A	#N/A	0.83343
PRPF3	858.758	-1.42506	0.684376	-2.08227	0.0373174	0.479132	0.372405	-0.866017	#N/A	1
SPRYD7	1304.73	1.37118	0.658645	2.08181	0.0373594	0.479132	2.58681	#N/A	#N/A	0.00020923
COL25A1	1692.17	-1.38517	0.665427	-2.08163	0.0373764	0.479132	0.382844	#N/A	#N/A	1.64e-18
AC005550.2	111.114	-3.17152	1.52305	-2.08234	0.0373111	0.479132	0.110988	#N/A	#N/A	#N/A
NOG	996.589	-1.43707	0.690516	-2.08116	0.0374192	0.479183	0.369315	#N/A	#N/A	0.89026
PITX2	16230.3	-0.511337	0.24577	-2.08055	0.0374751	0.479401	0.701572	0.394502	#N/A	0.97618
CDR2	959.735	1.47688	0.710241	2.07941	0.0375793	0.479739	2.78347	#N/A	#N/A	4.3e-07
GNAO1	1903.04	1.11704	0.537133	2.07963	0.0375598	0.479739	2.16901	1.11942	1	0.98963
MIR197	156.044	3.20396	1.54245	2.07719	0.0377837	0.48036	9.21485	#N/A	#N/A	#N/A
FLT1	226.287	-3.32803	1.60191	-2.07754	0.037752	0.48036	0.0995779	#N/A	#N/A	0.99983
SCG2	26267.4	0.476183	0.229152	2.07802	0.0377074	0.48036	1.39106	1.27893	#N/A	2.1176e-05
TRIM2	3310.69	0.737462	0.354919	2.07783	0.037725	0.48036	1.66724	1.07233	#N/A	0.99603
AC008608.2	45.5989	4.98982	2.40295	2.07654	0.0378441	0.480632	31.7751	#N/A	#N/A	#N/A
YWHAE	4638.1	-0.566932	0.273188	-2.07525	0.0379637	0.481655	0.675051	0.117577	1	0.98479
UBN1	1848.24	-0.909212	0.438325	-2.07429	0.0380527	0.482065	0.532476	#N/A	#N/A	0.99995
PCMTD2	1204.2	1.04881	0.505682	2.07405	0.0380742	0.482065	2.06883	#N/A	#N/A	0.0079948
DYNC1LI1	1877.13	1.07801	0.520037	2.07294	0.0381777	0.482879	2.11112	0.216624	#N/A	0.96348
COL16A1	3122.5	-0.658128	0.318021	-2.06945	0.0385043	0.483538	0.6337	-0.573661	#N/A	2.9e-24
AFAP1L2	169.958	3.38063	1.63257	2.07074	0.0383836	0.483538	10.4153	#N/A	#N/A	0.0021581
METTL12	124.07	3.55239	1.71621	2.0699	0.0384615	0.483538	11.7321	#N/A	#N/A	0.0019838
EIF4A3	3183.66	-0.811769	0.39188	-2.07147	0.0383145	0.483538	0.569683	0.181722	#N/A	0.99985
ATP9A	5218.23	0.588016	0.28413	2.06954	0.0384959	0.483538	1.50318	1.36689	#N/A	0.99999
MRPS27	2363.72	-0.83188	0.401707	-2.07086	0.0383716	0.483538	0.561797	0.534207	#N/A	1.92e-06
TMEM35A	3796.29	0.864687	0.41759	2.07066	0.0383906	0.483538	1.82094	1.71558	#N/A	#N/A
PSMD6-AS2	48.3859	5.12063	2.4754	2.06861	0.038583	0.483829	34.7907	#N/A	#N/A	#N/A
TAB2	3384.52	-0.781198	0.377689	-2.06836	0.0386059	0.483829	0.581883	1.06367	#N/A	0.99998
ACSF3	113.47	-3.56872	1.7267	-2.06679	0.038754	0.485192	0.0842769	1.24669	1	2.32e-26
RNF169	1183.07	-1.52348	0.737635	-2.06535	0.0388897	0.486398	0.347847	#N/A	#N/A	0.039503
TOMM34	1927.6	-0.910917	0.441359	-2.06389	0.0390277	0.487629	0.531847	-4.45609	#N/A	0.014459
ZNF236	93.1533	3.84176	1.86387	2.06117	0.0392867	0.490368	14.3379	#N/A	#N/A	1
PRKCQ-AS1	205.108	2.64615	1.28457	2.05995	0.0394035	0.490518	6.25995	#N/A	#N/A	#N/A
PTX3	444.053	-2.16842	1.05236	-2.06054	0.0393472	0.490518	0.222455	#N/A	#N/A	6.9827e-05
TNRC18	4620.58	-0.615284	0.298711	-2.0598	0.039418	0.490518	0.652801	#N/A	#N/A	0.99093
BID	3207.63	-0.723927	0.351651	-2.05865	0.0395277	0.491386	0.605447	-0.084475	#N/A	1.56e-11
RHOD	227.835	2.97075	1.44463	2.0564	0.0397436	0.493574	7.83943	#N/A	#N/A	0.015921
TMEM135	194.838	3.2121	1.56284	2.0553	0.0398503	0.493582	9.26699	#N/A	#N/A	0.7786
ZNF497	20.5159	-8.03373	3.90907	-2.05515	0.0398644	0.493582	0.00381597	#N/A	#N/A	NA
DFNA5	1254.8	1.06898	0.51996	2.05589	0.0397928	0.493582	2.09795	#N/A	#N/A	3.28e-09
CAPN7	997.694	-1.25105	0.609686	-2.05196	0.0401736	0.496912	0.420142	#N/A	#N/A	1.29e-13
CDKAL1	1248.12	-1.28136	0.624954	-2.05033	0.0403319	0.498369	0.411407	#N/A	#N/A	0.016021
AL603825.1	4539.04	-0.890498	0.434474	-2.0496	0.0404034	0.498753	0.539428	#N/A	#N/A	#N/A
ATP6V0B	8440.79	0.602423	0.294304	2.04694	0.040664	0.500434	1.51826	#N/A	#N/A	0.96895
LAMC2	4993.54	0.749728	0.366213	2.04724	0.0406342	0.500434	1.68148	0.66857	#N/A	2.88e-12
ZNF845	304.549	2.95989	1.44642	2.04636	0.0407212	0.500434	7.78065	#N/A	#N/A	0.00095913
FAM210B	6330.73	-0.706871	0.345241	-2.04747	0.040612	0.500434	0.612647	#N/A	#N/A	0.087064
RBFOX2	58637	-0.374877	0.183212	-2.04614	0.0407424	0.500434	0.771171	-0.381377	#N/A	0.99902
BTN3A3	311.222	2.45521	1.20128	2.04382	0.0409711	0.502742	5.48391	#N/A	#N/A	1.19e-18
EVI5L	627.045	1.47354	0.72116	2.04329	0.041024	0.50289	2.77702	4.01321	#N/A	0.99985
SLC16A9	5323.12	-0.581669	0.285153	-2.03985	0.0413653	0.503069	0.66819	#N/A	#N/A	0.007078
LRRC23	115.835	-3.19639	1.56728	-2.03944	0.0414057	0.503069	0.109092	#N/A	#N/A	1.84e-08
SUPT16H	8299.27	-0.523917	0.256608	-2.0417	0.041181	0.503069	0.695481	0.186036	#N/A	1
TRAPPC6A	798.683	-1.48709	0.728924	-2.04011	0.0413393	0.503069	0.356732	#N/A	#N/A	5.15e-08
NPAS2	1126.18	1.02845	0.503798	2.04139	0.0412117	0.503069	2.03983	#N/A	#N/A	1
CDC45	247.771	-3.35116	1.64306	-2.03959	0.0413913	0.503069	0.0979939	#N/A	#N/A	4.6237e-05
CLCN3	1934.74	0.815498	0.39971	2.04022	0.041328	0.503069	1.75991	4.50888	#N/A	0.99973
PNRC1	1785.97	-1.11061	0.544285	-2.04049	0.0413013	0.503069	0.463098	#N/A	#N/A	0.90825
WIPI2	2936.66	0.742187	0.363411	2.04228	0.0411236	0.503069	1.67271	#N/A	#N/A	0.0063887
EPB41L3	1125.51	1.57437	0.77264	2.03765	0.0415847	0.503755	2.97806	0.447498	#N/A	4.3188e-05
SNORD140	4205.67	0.608474	0.298527	2.03826	0.041524	0.503755	1.52465	#N/A	#N/A	#N/A
TNIP1	1090.15	1.34954	0.662271	2.03775	0.0415752	0.503755	2.54831	#N/A	#N/A	0.47559
CHRAC1	618.001	-1.72122	0.845151	-2.03659	0.0416916	0.504555	0.303292	#N/A	#N/A	0.06952
MSI2	2982.58	-0.727733	0.357471	-2.03578	0.0417722	0.504948	0.603852	0.584406	#N/A	0.99478
NR2C2AP	356.788	-2.35027	1.15467	-2.03545	0.041806	0.504948	0.196109	#N/A	#N/A	0.24422
CHEK2	483.317	-1.80191	0.885928	-2.03393	0.041959	0.5063	0.286794	#N/A	#N/A	1.21e-24
ETV1	1333.22	-1.21476	0.597558	-2.03287	0.0420655	0.506593	0.430845	#N/A	#N/A	0.93694
DPH7	1166.86	1.21894	0.599576	2.033	0.0420524	0.506593	2.32775	#N/A	#N/A	1.86e-08
EIF4B	3794.12	-0.801028	0.39412	-2.03245	0.0421085	0.506617	0.57394	-0.32234	#N/A	0.99999
PCYT2	1173.83	1.36664	0.67282	2.03121	0.0422339	0.506893	2.57869	0.681517	#N/A	0.0008643
CALU	30055	0.429588	0.211515	2.031	0.0422548	0.506893	1.34685	0.0568643	#N/A	0.014005
SNTB1	787.019	-1.81192	0.891852	-2.03164	0.0421905	0.506893	0.284812	-1.6522	#N/A	0.0010263
METTL18	216.584	-2.46195	1.213	-2.02964	0.042393	0.506989	0.181501	#N/A	#N/A	2.8027e-05
KREMEN2	182.411	-2.94557	1.45066	-2.03051	0.0423051	0.506989	0.129806	#N/A	#N/A	3.7207e-05
POLR2I	3817.28	0.648982	0.319805	2.0293	0.0424273	0.506989	1.56806	#N/A	#N/A	0.36015
CRYGD	19.1581	-7.9351	3.90923	-2.02983	0.0423733	0.506989	0.00408599	#N/A	#N/A	0.00030317
MAP1B	33745.7	0.574781	0.28338	2.02831	0.0425291	0.507714	1.48945	0.824564	#N/A	1
EIF5AL1	8933.46	0.530047	0.261517	2.02682	0.0426811	0.50814	1.44398	#N/A	#N/A	0.34147
APIP	475.577	-1.78317	0.879994	-2.02634	0.0427296	0.50814	0.290544	#N/A	#N/A	2.69e-11
MYO5A	864.23	1.46155	0.721171	2.02663	0.0427006	0.50814	2.75403	1.30281	1	0.944
FHOD1	860.288	-1.58854	0.78381	-2.02669	0.0426941	0.50814	0.332508	-0.747959	#N/A	1.81e-16
CEBPB	4016.8	-0.643223	0.317727	-2.02445	0.0429235	0.508974	0.640281	#N/A	#N/A	0.35809
2020-09-03	1876.41	0.952579	0.470436	2.02489	0.042879	0.508974	1.93533	1.57762	#N/A	0.089413
DNM1	877.684	1.55921	0.770065	2.02478	0.0428901	0.508974	2.94693	0.77613	1	0.99917
CELSR3	604.962	-1.55983	0.771264	-2.02244	0.0431312	0.510945	0.33919	#N/A	#N/A	0.99998
ALDH18A1	6026.14	0.588141	0.291069	2.02063	0.0433185	0.512672	1.50331	0.411705	1	0.00081212
SLC25A15	344.94	2.15679	1.06788	2.0197	0.043415	0.51332	4.45923	#N/A	1	3.7e-07
ZBTB3	378.569	2.48939	1.23499	2.01571	0.0438302	0.514828	5.61541	#N/A	#N/A	0.019277
ARHGEF40	3410.89	0.703001	0.348837	2.01527	0.0438764	0.514828	1.62789	-1.20502	#N/A	6.63e-09
SCG3	1352.64	1.14974	0.569846	2.01764	0.0436291	0.514828	2.21874	#N/A	#N/A	0.0014883
PARP6	1183.13	1.25333	0.621108	2.0179	0.0436021	0.514828	2.38391	#N/A	#N/A	0.99996
RAB11FIP4	871.109	1.38119	0.685264	2.01556	0.0438457	0.514828	2.60484	#N/A	#N/A	0.99199
CENPW	628.871	2.15267	1.06804	2.01553	0.043849	0.514828	4.44649	#N/A	#N/A	0.40523
AL590302.1	81.969	-3.64887	1.8097	-2.01628	0.0437703	0.514828	0.0797227	#N/A	#N/A	#N/A
SOSTDC1	18.4516	-7.88087	3.90933	-2.01591	0.0438089	0.514828	0.0042425	#N/A	#N/A	0.16334
EBNA1BP2	1113.92	1.33239	0.661907	2.01296	0.0441189	0.517181	2.5182	0.0167924	#N/A	1.37e-09
REEP1	2195.31	0.917526	0.455949	2.01234	0.044184	0.517452	1.88887	-0.0871219	#N/A	0.98632
AC144652.1	46.0283	-5.11547	2.54367	-2.01106	0.0443193	0.518053	0.0288463	#N/A	#N/A	#N/A
TMEM67	377.615	-1.95101	0.970124	-2.0111	0.0443154	0.518053	0.258635	#N/A	1	2.07e-24
API5	1999.35	-0.97708	0.486099	-2.01004	0.0444267	0.518489	0.508007	-0.170962	#N/A	0.99996
FUCA2	1689.73	-1.30702	0.650289	-2.00991	0.0444407	0.518489	0.404154	-0.157193	#N/A	4.39e-07
ELAVL1	6605.52	-0.504023	0.250843	-2.00932	0.0445036	0.518732	0.705138	0.219572	#N/A	0.98849
TAF9B	1324.38	1.12444	0.559934	2.00817	0.0446257	0.519664	2.18017	#N/A	#N/A	1.09e-10
RANBP10	290.913	-2.22315	1.10776	-2.00689	0.0447618	0.520472	0.214174	#N/A	#N/A	0.96855
TSPAN17	2527.7	0.934172	0.465522	2.00672	0.0447795	0.520472	1.91079	#N/A	#N/A	1.511e-06
STARD4	489.493	1.61097	0.803208	2.00567	0.0448911	0.521278	3.05458	#N/A	#N/A	6.99e-11
TCEA1	5294.68	-0.588174	0.293373	-2.00487	0.0449772	0.521787	0.665184	-0.186087	#N/A	0.89541
CYC1	2397.5	0.830261	0.414212	2.00444	0.0450234	0.521831	1.77801	0.748137	#N/A	0.13875
GALNT9	146.563	3.77497	1.88373	2.00399	0.0450712	0.521895	13.6893	#N/A	#N/A	0.0052407
MED11	384.655	-2.21232	1.10466	-2.00271	0.0452087	0.522996	0.215787	#N/A	#N/A	9.36e-08
RMND5A	1139.55	-1.23061	0.614636	-2.00218	0.0452659	0.523167	0.426138	#N/A	#N/A	0.89983
TOX3	289.378	-2.42207	1.21043	-2.00101	0.0453916	0.523997	0.186588	#N/A	#N/A	0.9995
FAF2	2423.34	-0.705107	0.352427	-2.00072	0.0454227	0.523997	0.613397	-0.100351	#N/A	0.99911
FBXO42	839.183	-1.27792	0.639881	-1.99712	0.0458125	0.524511	0.412391	#N/A	#N/A	0.99503
LDHB	24051.3	-0.367905	0.184452	-1.99458	0.0460882	0.524511	0.774907	-0.00974109	#N/A	4.97e-06
NGDN	1410.2	-0.961841	0.481151	-1.99904	0.0456038	0.524511	0.513401	#N/A	#N/A	2.04e-08
ZDHHC1	392.362	1.76622	0.8852	1.99528	0.0460126	0.524511	3.40162	#N/A	#N/A	4.84e-10
KCTD11	352.881	2.09078	1.04589	1.99904	0.045604	0.524511	4.25978	#N/A	#N/A	0.0054961
TIMM44	2264.21	-0.929441	0.465292	-1.99754	0.0457661	0.524511	0.525062	-0.209893	#N/A	0.0015924
ACP1	2369.28	0.862015	0.432333	1.99387	0.0461663	0.524511	1.81757	0.179875	#N/A	1.75e-08
RRBP1	4531.73	0.634716	0.318351	1.99376	0.0461783	0.524511	1.55263	0.0145878	#N/A	2.29e-11
TM4SF1	207.96	2.92643	1.465	1.99757	0.0457635	0.524511	7.60225	#N/A	#N/A	0.0015619
WDFY3	991.534	1.13003	0.566442	1.99496	0.0460476	0.524511	2.18863	#N/A	#N/A	1
YIPF5	8609.6	0.562646	0.281694	1.99737	0.0457853	0.524511	1.47698	-0.0986425	#N/A	0.98529
RPL10A	17664.4	-0.554239	0.277624	-1.99636	0.0458942	0.524511	0.681016	-0.158555	#N/A	0.85357
HIP1	1602.91	-0.965361	0.48411	-1.9941	0.0461417	0.524511	0.51215	0.50016	#N/A	0.76173
CHPF2	4139.67	0.731025	0.366677	1.99365	0.0461903	0.524511	1.65982	-1.62066	#N/A	2.19e-17
E2F5	3506.4	0.689268	0.345278	1.99627	0.0459045	0.524511	1.61246	#N/A	#N/A	0.935
RPL30	65117.5	-0.360991	0.180848	-1.9961	0.0459232	0.524511	0.778629	-0.0206236	#N/A	0.84674
ATP6AP2	6568.02	0.66205	0.331787	1.99541	0.0459986	0.524511	1.58233	4.75701	1	0.87089
SLC16A10	21.2236	7.78674	3.90859	1.99221	0.0463475	0.525812	220.822	#N/A	#N/A	0.30853
RPL10	61931	-0.485088	0.243577	-1.99151	0.0464244	0.5262	0.714454	-0.0473486	1	0.90915
NECTIN3	489.233	-1.94266	0.976079	-1.99027	0.0465612	0.527169	0.260136	#N/A	#N/A	#N/A
SDC2	4544.56	0.581651	0.292293	1.98996	0.0465954	0.527169	1.49656	-0.79729	#N/A	0.4049
PHF3	1391.19	-1.15665	0.581404	-1.98941	0.0466557	0.527368	0.448552	#N/A	#N/A	0.99256
MTG2	694.912	1.78149	0.895833	1.98864	0.0467412	0.52785	3.43781	#N/A	#N/A	0.00033086
FTH1P20	317041	0.362974	0.182725	1.98646	0.0469826	0.530091	1.28607	#N/A	#N/A	#N/A
TSPO	10935.2	-0.464176	0.233747	-1.98581	0.047055	0.530422	0.724885	-0.242931	#N/A	0.00027398
MDGA1	125.957	4.08671	2.05886	1.98494	0.0471515	0.531025	16.9911	#N/A	#N/A	0.97574
MRM3	250.212	-3.35789	1.69285	-1.98358	0.047303	0.532245	0.0975382	#N/A	#N/A	#N/A
PLXND1	1763.63	1.10374	0.556624	1.98291	0.047377	0.532592	2.14911	#N/A	#N/A	1
TCERG1L	20.6613	7.74687	3.90864	1.98199	0.0474805	0.532784	214.803	#N/A	#N/A	6.84e-09
TMA16	875.127	-1.64488	0.829866	-1.9821	0.0474684	0.532784	0.319774	0.0524034	#N/A	9.6522e-05
AL669831.5	20.1635	7.71249	3.90868	1.97317	0.0484763	0.534635	209.744	#N/A	#N/A	#N/A
AL050341.2	78.1721	4.59297	2.32745	1.97339	0.0484512	0.534635	24.1335	#N/A	#N/A	#N/A
CFH	1953.41	0.899781	0.456257	1.97209	0.0485993	0.534635	1.86578	#N/A	#N/A	0.86061
GAS2	56.0427	-5.36813	2.71237	-1.97913	0.0478016	0.534635	0.024212	#N/A	#N/A	0.00080175
EHBP1L1	904.259	-1.77931	0.900538	-1.97583	0.0481743	0.534635	0.291323	-3.93594	#N/A	7.12e-13
LOC341056	2675.96	0.746516	0.378001	1.9749	0.0482792	0.534635	1.67774	#N/A	#N/A	#N/A
MLF2	8405.22	0.502303	0.25422	1.97586	0.0481703	0.534635	1.41647	#N/A	#N/A	0.86042
KRR1	5614.42	0.602958	0.304985	1.97701	0.0480408	0.534635	1.51883	#N/A	#N/A	0.00069317
RMDN3	881.792	1.23139	0.62253	1.97803	0.047925	0.534635	2.34792	0.975627	#N/A	5.1687e-05
MRPS34	1491.31	1.37474	0.694614	1.97914	0.0478004	0.534635	2.59321	0.460311	#N/A	0.0026375
BCAS3	947.565	-1.2815	0.649037	-1.97447	0.0483288	0.534635	0.411367	0.506119	#N/A	0.00013819
RAD23A	2342.42	-0.910263	0.460333	-1.9774	0.0479964	0.534635	0.532088	-0.0750097	#N/A	0.18355
KRCC1	494.707	-1.50115	0.758611	-1.97882	0.0478366	0.534635	0.353271	#N/A	#N/A	0.00067915
RHBDD1	449.892	1.52524	0.773255	1.9725	0.0485527	0.534635	2.87836	#N/A	#N/A	1.06e-12
USF3	325.99	-2.41056	1.21963	-1.97647	0.048102	0.534635	0.188082	#N/A	#N/A	#N/A
FAM169A	487.041	1.63724	0.829293	1.97426	0.0483521	0.534635	3.1107	0.386188	#N/A	0.99907
TMEM243	661.093	-1.53327	0.776631	-1.97426	0.0483525	0.534635	0.345493	#N/A	#N/A	1.05e-06
ZNF862	552.348	-2.0326	1.03045	-1.97254	0.0485483	0.534635	0.244414	#N/A	#N/A	6.78e-12
PKIA	2136.18	0.852278	0.432135	1.97225	0.0485813	0.534635	1.80535	-0.277678	#N/A	0.1418
DNAJA1	7048.66	0.634685	0.321463	1.97436	0.0483405	0.534635	1.5526	1.10024	#N/A	0.090813
JPX	330.286	2.63389	1.33227	1.97699	0.0480428	0.534635	6.20696	#N/A	#N/A	#N/A
TMSB15A	793.172	-1.32553	0.66947	-1.97997	0.0477074	0.534635	0.399003	0.867711	#N/A	0.39053
ZNF100	20.0311	7.70213	3.9087	1.97051	0.0487799	0.536144	208.243	#N/A	#N/A	0.00018933
TINAGL1	426.243	2.97643	1.51198	1.96856	0.0490034	0.537643	7.87036	#N/A	#N/A	0.00032933
CNTN6	608.408	2.09602	1.06469	1.96866	0.048992	0.537643	4.27529	#N/A	#N/A	9.02e-31
CDKN3	912.206	-1.80706	0.919305	-1.96568	0.0493355	0.540805	0.285773	#N/A	#N/A	0.0019455
PPDPF	11088.8	0.465627	0.236951	1.96508	0.0494054	0.54109	1.38092	0.956864	#N/A	0.00010213
INA	1808.71	0.790382	0.402674	1.96284	0.0496653	0.542491	1.72953	1.26592	#N/A	1.48e-08
INPP4B	932.725	-1.75461	0.893653	-1.96342	0.0495975	0.542491	0.296352	-1.8281	#N/A	0.55218
TRAPPC9	1255.19	0.98328	0.500874	1.96313	0.0496315	0.542491	1.97695	#N/A	1	2.29e-14
LIN7C	2133.82	0.826948	0.421705	1.96096	0.0498831	0.544043	1.77393	0.126737	#N/A	0.051327
RTTN	461.358	-1.61962	0.825977	-1.96086	0.0498956	0.544043	0.325421	#N/A	#N/A	8.97e-34
RIT1	2158.59	0.781275	0.398988	1.95814	0.0502133	0.545706	1.71865	#N/A	1	0.13281
LOC102723665	229.902	-3.10766	1.58649	-1.95883	0.0501327	0.545706	0.116012	#N/A	#N/A	#N/A
C18orf8	969	-1.23979	0.633118	-1.95823	0.0502035	0.545706	0.423435	#N/A	#N/A	0.98823
AC090114.1	32584.8	-0.530829	0.271102	-1.95804	0.0502252	0.545706	0.692157	#N/A	#N/A	#N/A
AEBP2	1058.77	-1.23078	0.629696	-1.95455	0.0506356	0.547633	0.426088	#N/A	#N/A	0.99921
LEMD3	1082.92	-1.3639	0.697989	-1.95404	0.0506969	0.547633	0.388532	0.658077	#N/A	0.99877
LRP10	2393.02	0.850539	0.434929	1.95558	0.0505146	0.547633	1.80317	#N/A	#N/A	4.98e-08
RTN1	5027.71	0.670138	0.343041	1.95352	0.0507577	0.547633	1.59123	0.729948	#N/A	0.98593
ATF4	17936.6	-0.44157	0.226014	-1.95373	0.0507333	0.547633	0.736333	#N/A	#N/A	0.015659
SNAI2	3917.7	-0.653175	0.334244	-1.95419	0.0506793	0.547633	0.635879	#N/A	#N/A	0.79531
NFIB	8543.2	-0.544442	0.278529	-1.95471	0.0506177	0.547633	0.685656	-0.00147104	#N/A	0.99861
SIGMAR1	2238.94	-0.810677	0.414561	-1.95551	0.0505233	0.547633	0.570114	-2.10577	#N/A	0.1678
FAM53A	22.4236	-7.19284	3.68525	-1.95179	0.0509629	0.548886	0.00683502	#N/A	#N/A	0.0035705
NUDT6	210.409	-2.72525	1.39626	-1.95182	0.050959	0.548886	0.151223	#N/A	#N/A	2.9113e-05
NET1	1136.22	-1.31245	0.673339	-1.94917	0.0512752	0.550661	0.402636	#N/A	#N/A	2.1e-06
ZRANB1	1709.37	-0.979621	0.502821	-1.94825	0.0513853	0.550661	0.507113	#N/A	#N/A	0.99885
LINC01164	483.726	1.68803	0.866436	1.94825	0.0513856	0.550661	3.22216	#N/A	#N/A	#N/A
PCK2	594.083	-1.87781	0.963711	-1.94852	0.0513531	0.550661	0.272097	-0.0704849	#N/A	1.75e-23
SPIDR	552.949	-1.69016	0.866982	-1.94947	0.0512391	0.550661	0.309893	#N/A	#N/A	2.38e-17
EIF2S3	16348.7	-0.444877	0.228357	-1.94816	0.0513957	0.550661	0.734647	-0.268626	#N/A	0.96388
SPIRE2	60.8642	4.68779	2.40682	1.94772	0.0514489	0.550754	25.7731	#N/A	#N/A	2.44e-09
ARL6IP4	3992.38	0.784442	0.403046	1.94629	0.0516205	0.550942	1.72243	#N/A	#N/A	0.00090784
EIF2AK1	2529.84	-0.797181	0.409446	-1.94697	0.0515379	0.550942	0.575472	#N/A	#N/A	7.01e-07
C7orf43	507.043	1.60679	0.825655	1.94608	0.0516453	0.550942	3.04574	#N/A	#N/A	0.18133
TMSB15B	276.337	-1.88132	0.966525	-1.94648	0.0515969	0.550942	0.271435	0.867711	#N/A	0.38882
HCFC2	586.333	-1.6096	0.827299	-1.94561	0.0517015	0.551065	0.327689	#N/A	#N/A	0.99989
PUM1	5046.41	0.562184	0.289438	1.94233	0.052097	0.551941	1.4765	0.109187	#N/A	1
MSRB3	999.882	1.09957	0.565594	1.9441	0.0518838	0.551941	2.14291	-1.79543	#N/A	0.003766
AC018755.3	48.3108	5.03512	2.59192	1.94262	0.0520623	0.551941	32.7884	#N/A	#N/A	#N/A
MARS2	113.697	3.94863	2.03076	1.94441	0.0518457	0.551941	15.4403	#N/A	#N/A	5.4482e-05
LINC01547	26.689	6.50655	3.34971	1.94242	0.0520862	0.551941	90.9212	#N/A	#N/A	#N/A
TARS	4179.41	-0.683426	0.351731	-1.94304	0.0520119	0.551941	0.622685	-0.0594171	#N/A	9.95e-13
CAV1	3599.29	0.745906	0.383927	1.94283	0.0520364	0.551941	1.67703	0.191632	#N/A	0.008274
PTMA	16890.4	-0.449671	0.23163	-1.94133	0.0522183	0.552752	0.73221	-0.366861	#N/A	0.034451
EPB41L1	1530.42	0.96131	0.495294	1.94089	0.0522721	0.552784	1.94708	1.488	1	0.87683
CSRNP1	795.896	1.18774	0.61206	1.94057	0.052311	0.552784	2.27796	#N/A	#N/A	0.34269
GRHPR	5641.61	-0.593148	0.305825	-1.9395	0.05244	0.553673	0.662895	-0.32883	#N/A	4.64e-07
RIOK1	987.81	-1.05504	0.544501	-1.93763	0.0526679	0.555603	0.481283	#N/A	#N/A	2.25e-14
EFNA3	264.057	-2.11021	1.08953	-1.93681	0.0527692	0.555721	0.231613	#N/A	#N/A	0.15339
FOXC2-AS1	18.2879	7.57191	3.90888	1.9371	0.0527325	0.555721	190.27	#N/A	#N/A	#N/A
ANKRD10	1715.21	-0.844341	0.436285	-1.9353	0.0529538	0.555838	0.556965	#N/A	#N/A	0.1645
CCDC191	199.72	-2.62669	1.35703	-1.93561	0.052915	0.555838	0.161915	#N/A	#N/A	#N/A
SEL1L3	1932.57	0.993668	0.513456	1.93525	0.0529594	0.555838	1.99124	#N/A	#N/A	0.0035827
NUP153	350.614	-1.75772	0.908271	-1.93524	0.0529606	0.555838	0.295714	0.182101	#N/A	1
RPLP2	58684.6	-0.440209	0.227549	-1.93457	0.0530428	0.555972	0.737028	-0.0439129	#N/A	0.66744
MZT1	869.221	-1.31973	0.682241	-1.9344	0.0530635	0.555972	0.40061	#N/A	#N/A	0.045971
ILK	3866.09	0.655309	0.338887	1.93371	0.0531488	0.556156	1.57495	0.104108	#N/A	3.7887e-05
CAPN1	1752.99	1.00743	0.521032	1.93353	0.0531713	0.556156	2.01033	-0.239663	#N/A	5.86e-10
C2orf27A	77.0007	3.55411	1.84059	1.93096	0.053488	0.558994	11.7461	#N/A	#N/A	0.3491
SCYL1	3265.15	0.705761	0.365715	1.92981	0.0536304	0.560008	1.631	-0.237536	#N/A	2.52e-08
CASKIN1	163.602	2.86643	1.48657	1.92822	0.0538274	0.56159	7.29259	#N/A	#N/A	1
AC114491.1	3619.02	0.641725	0.333028	1.92694	0.0539868	0.562302	1.56019	#N/A	#N/A	#N/A
ZBTB1	1251.14	-0.951753	0.493893	-1.92704	0.0539743	0.562302	0.517004	#N/A	#N/A	0.99407
HEY1	752.975	-1.29768	0.673983	-1.92539	0.0541808	0.563846	0.40678	#N/A	#N/A	0.050181
INPP5A	1530.74	0.900172	0.467883	1.92393	0.0543638	0.564322	1.86629	#N/A	#N/A	0.98121
PCF11	1473.43	-1.28343	0.666968	-1.92427	0.0543202	0.564322	0.410818	#N/A	#N/A	1
SDCCAG3	1565.55	-0.807377	0.419646	-1.92395	0.054361	0.564322	0.57142	#N/A	#N/A	3.65e-13
RAD54L2	796.915	-1.43457	0.746054	-1.92288	0.0544947	0.565205	0.369956	-2.11716	#N/A	1
ESD	2268.39	-0.837166	0.435604	-1.92185	0.0546245	0.566075	0.559742	0.362849	#N/A	5.39e-07
EEF1AKMT1	388.774	-2.01072	1.04729	-1.91992	0.0548677	0.568035	0.248149	#N/A	#N/A	#N/A
STC2	5168.08	-0.629568	0.327965	-1.91962	0.0549057	0.568035	0.64637	#N/A	#N/A	0.26588
MTUS2	164.561	2.70793	1.41235	1.91733	0.0551963	0.568951	6.53385	#N/A	#N/A	0.79549
MYL4	1519.55	-1.41267	0.736877	-1.9171	0.055225	0.568951	0.375617	-1.90013	#N/A	0.00012029
ATF2	2639.62	-1.21546	0.633692	-1.91806	0.0551036	0.568951	0.430636	#N/A	#N/A	0.99131
ZFP64	379.069	2.32714	1.21344	1.9178	0.0551361	0.568951	5.01808	#N/A	#N/A	0.00016534
NECTIN3-AS1	17.3341	7.49441	3.909	1.91722	0.0552098	0.568951	180.319	#N/A	#N/A	#N/A
S100A16	6479.92	0.517857	0.270679	1.91318	0.0557249	0.569442	1.43183	0.567452	#N/A	0.0010573
TMEM126B	1322.87	0.93577	0.48859	1.91525	0.0554611	0.569442	1.91291	#N/A	#N/A	0.00018551
PAN2	423.222	-1.52488	0.797317	-1.91251	0.0558108	0.569442	0.347509	#N/A	#N/A	0.93596
RPL23	71833.8	-0.443569	0.231972	-1.91217	0.0558544	0.569442	0.735313	-0.099277	#N/A	0.33031
ZNF407	518.19	-1.60835	0.840017	-1.91466	0.055536	0.569442	0.327974	#N/A	#N/A	1
ASB1	1232.41	0.993168	0.519395	1.91217	0.055855	0.569442	1.99055	#N/A	#N/A	0.0029925
TFDP2	559.111	1.66578	0.870719	1.91311	0.0557341	0.569442	3.17285	#N/A	#N/A	0.9995
SPARCL1	3542.58	-0.636292	0.332405	-1.91421	0.0555939	0.569442	0.643364	#N/A	#N/A	5.64e-10
FAT4	1220.91	-1.31759	0.687609	-1.9162	0.0553401	0.569442	0.401204	-1.09967	#N/A	1
SIL1	1972.28	0.793315	0.414704	1.91297	0.0557524	0.569442	1.73305	-1.25289	1	0.012265
ACO1	6168.76	-0.52463	0.274384	-1.91203	0.0558729	0.569442	0.695137	-0.593116	#N/A	3.83e-18
EIF4BP3	1123.57	1.0372	0.541826	1.91427	0.0555851	0.569442	2.05225	#N/A	#N/A	#N/A
STXBP1	614.505	1.49607	0.780892	1.91584	0.0553852	0.569442	2.82072	1.2066	1	1
F3	1762.96	-0.913624	0.478367	-1.90988	0.0561486	0.570482	0.53085	#N/A	#N/A	0.018872
ZNF408	283.813	2.60286	1.36436	1.90774	0.0564244	0.570482	6.07489	#N/A	#N/A	1.18e-06
GATM	2541.58	-0.865667	0.453722	-1.90792	0.0564011	0.570482	0.548793	0.305856	1	0.051418
HDGFRP3	4584.16	-0.58015	0.304056	-1.90804	0.056386	0.570482	0.668894	#N/A	#N/A	0.9738
RNASEH2A	1056.72	-1.38657	0.726346	-1.90897	0.0562662	0.570482	0.382473	#N/A	1	0.0041807
ENSG00000265629	47.932	4.91162	2.57062	1.91068	0.0560459	0.570482	30.0985	#N/A	#N/A	#N/A
NAGK	3918.44	0.580373	0.303907	1.90971	0.0561706	0.570482	1.49524	0.0873114	#N/A	4.55e-09
AP2M1	24879.1	0.336005	0.176002	1.9091	0.0562497	0.570482	1.26226	0.252738	#N/A	0.99919
PDGFC	4718.79	0.61972	0.324667	1.90878	0.05629	0.570482	1.53658	0.561	#N/A	0.99374
GEM	873.729	1.20497	0.631656	1.90764	0.0564376	0.570482	2.30533	#N/A	#N/A	1.18e-08
GALNT16	693.196	1.54094	0.808689	1.90547	0.0567185	0.571112	2.90983	#N/A	#N/A	0.00013872
PPP1R13B	410.183	2.21488	1.16266	1.90502	0.0567778	0.571112	4.64243	#N/A	#N/A	0.99811
MIEN1	1106.62	1.22149	0.640699	1.90649	0.0565866	0.571112	2.33187	0.0372388	#N/A	0.55257
RNF130	2163.28	-1.15115	0.604137	-1.90545	0.0567211	0.571112	0.450265	#N/A	#N/A	0.00030327
MFSD14B	1886.96	-0.939461	0.492929	-1.90588	0.0566664	0.571112	0.521428	#N/A	#N/A	#N/A
SRPX2	897.322	1.55096	0.814132	1.90505	0.0567742	0.571112	2.93012	3.09309	1	0.04812
TP53RK	566.391	1.43356	0.753046	1.90368	0.0569522	0.5724	2.70112	-0.756338	#N/A	0.00077469
ZNF614	492.516	-2.20602	1.1592	-1.90306	0.0570333	0.572748	0.216731	#N/A	#N/A	1.51e-07
SIRT6	727.216	1.28993	0.678117	1.90222	0.057142	0.573373	2.44516	#N/A	#N/A	0.039119
C19orf53	4369.74	-0.652863	0.34336	-1.90139	0.0572507	0.57353	0.636017	#N/A	#N/A	0.056204
QKI	12210.6	-0.474911	0.249745	-1.90158	0.0572263	0.57353	0.719511	-0.178192	#N/A	0.75121
WWC1	671.428	1.3011	0.684728	1.90018	0.0574101	0.574661	2.46417	#N/A	#N/A	0.00039438
SHMT2	4241.13	-0.687878	0.362276	-1.89877	0.057595	0.575628	0.620766	-0.270028	#N/A	7.82e-08
ERCC6L2	263.583	2.33779	1.23124	1.89873	0.0576002	0.575628	5.05527	#N/A	#N/A	5.06e-07
SRC	850.718	1.41608	0.746542	1.89685	0.0578477	0.576234	2.66859	0.0816741	#N/A	0.99691
SERPINI1	340.655	-2.66971	1.4073	-1.89704	0.0578222	0.576234	0.157158	#N/A	#N/A	0.026631
EIF3E	2244.78	-0.716172	0.37736	-1.89785	0.057716	0.576234	0.608711	-0.0455758	#N/A	0.05196
PSIP1	4636.27	-0.684134	0.360616	-1.89712	0.0578117	0.576234	0.622379	0.540717	#N/A	0.99668
RSRP1	1382.35	-1.00997	0.532702	-1.89593	0.057969	0.576511	0.496557	#N/A	#N/A	#N/A
BNIP3	2628.33	-0.858643	0.452863	-1.89603	0.0579557	0.576511	0.551471	#N/A	#N/A	1.9687e-05
EXT1	4090.27	0.780883	0.412038	1.89517	0.0580696	0.577046	1.71818	#N/A	#N/A	0.99732
CCDC28A	557.079	-1.42917	0.754544	-1.89408	0.0582143	0.578018	0.371345	#N/A	#N/A	3.65e-10
PUM2	2511.83	-0.726681	0.383906	-1.89286	0.058376	0.579158	0.604292	0.748698	#N/A	0.99492
RCAN2	1893.95	0.742151	0.392317	1.89171	0.058529	0.580208	1.67267	#N/A	#N/A	0.83475
DBI	7250.25	-0.498609	0.263627	-1.89134	0.0585789	0.580237	0.707789	-0.156146	#N/A	0.0013944
ERLEC1	2493.09	-0.762079	0.403375	-1.88926	0.0588574	0.581594	0.589646	0.983206	#N/A	3.25e-06
MB21D2	107.603	-3.76468	1.99249	-1.88943	0.0588336	0.581594	0.0735731	#N/A	#N/A	0.042673
KIF4A	273.409	2.65871	1.40709	1.88951	0.0588238	0.581594	6.31468	#N/A	#N/A	0.99998
KCNN3	254.851	-2.33327	1.23601	-1.88774	0.0590613	0.583142	0.198434	#N/A	#N/A	0.97227
CPXM2	159.82	-3.03207	1.60785	-1.88579	0.0593229	0.583505	0.122252	#N/A	#N/A	5.49e-13
CLCN7	1451.33	0.946969	0.50237	1.885	0.0594293	0.583505	1.92782	-0.464117	#N/A	0.27238
CXCL16	382.773	-2.22332	1.17844	-1.88666	0.0592058	0.583505	0.214148	#N/A	#N/A	3.4546e-05
BAZ2B	868.932	-1.30383	0.691206	-1.88632	0.0592525	0.583505	0.405049	#N/A	#N/A	0.98162
F2R	5142.96	0.637876	0.338173	1.88624	0.059262	0.583505	1.55604	#N/A	#N/A	0.0084678
NDUFB2	2980.57	0.648213	0.343836	1.88524	0.0593976	0.583505	1.56723	#N/A	#N/A	1.0531e-05
S1PR3	622.348	-2.29499	1.21722	-1.88543	0.0593721	0.583505	0.20377	#N/A	#N/A	0.046945
SORT1	3287.66	0.647183	0.343416	1.88455	0.0594911	0.583647	1.56611	4.73098	#N/A	0.99987
PLPP4	404.915	1.92586	1.02238	1.8837	0.059606	0.583996	3.79962	#N/A	#N/A	#N/A
WDR41	1860.01	-0.967656	0.513731	-1.88358	0.0596214	0.583996	0.511336	0.225493	#N/A	6.5e-14
SFR1	189.364	-2.3367	1.24136	-1.88237	0.0597854	0.585137	0.197963	#N/A	#N/A	4.71e-10
SVIP	1172.96	-1.07244	0.570392	-1.88018	0.060084	0.585422	0.475515	#N/A	#N/A	0.00030038
TTPAL	796.892	1.1947	0.635577	1.87972	0.0601467	0.585422	2.28898	#N/A	#N/A	0.116
CAMK4	368.426	-2.13169	1.13393	-1.87991	0.0601201	0.585422	0.228191	#N/A	#N/A	0.50957
CDK14	2698.09	-0.802521	0.42669	-1.88081	0.0599981	0.585422	0.573346	#N/A	#N/A	2.5e-08
CDK5	1438.77	1.18532	0.630278	1.88063	0.0600227	0.585422	2.27414	-0.0630538	#N/A	0.13892
PABPC1	27225.3	-0.380451	0.202192	-1.88163	0.0598866	0.585422	0.768197	0.550062	#N/A	0.99601
SMIM27	471.906	-1.51178	0.804175	-1.87991	0.0601203	0.585422	0.350679	#N/A	#N/A	#N/A
TMEM132C	105.804	-3.7474	1.99644	-1.87704	0.0605128	0.587645	0.0744596	#N/A	#N/A	0.63879
TNIP2	792.286	1.39892	0.745288	1.87703	0.0605145	0.587645	2.63705	#N/A	#N/A	0.0015926
SLC22A5	369.242	2.26885	1.20876	1.877	0.0605181	0.587645	4.81939	#N/A	#N/A	5.27e-16
TCEA2	351.352	1.81388	0.966556	1.87665	0.0605667	0.587654	3.51587	#N/A	#N/A	0.00056849
CDK5R2	848.251	1.26744	0.675552	1.87616	0.0606335	0.587839	2.40735	#N/A	#N/A	0.67068
TSC22D1	10420.3	0.394247	0.210208	1.87551	0.0607222	0.588237	1.31426	0.392817	#N/A	0.9599
FAM181B	251.874	-2.57135	1.37143	-1.87493	0.0608021	0.588549	0.168247	#N/A	#N/A	0.069368
GHITM	4846.5	0.618586	0.330242	1.87313	0.0610507	0.590492	1.53537	0.375205	#N/A	0.011502
RCAN3	287.996	2.21207	1.18222	1.87112	0.0613287	0.590864	4.6334	#N/A	#N/A	0.00015715
GPALPP1	730.022	-1.37249	0.733198	-1.87192	0.0612181	0.590864	0.386225	#N/A	#N/A	1.7222e-05
DNAJC3	2345.27	0.854973	0.456866	1.87139	0.0612917	0.590864	1.80873	0.286555	#N/A	0.017493
CALM1	29179.3	0.361586	0.193204	1.87152	0.0612725	0.590864	1.28484	0.284822	#N/A	0.94473
NFE2L2	2415.33	-0.887496	0.47417	-1.87168	0.0612507	0.590864	0.540552	#N/A	#N/A	0.0035719
UBE2J1	2471.62	0.694362	0.371194	1.87062	0.0613983	0.591073	1.61817	1.26262	#N/A	0.43658
RPS28	324.406	-1.7783	0.951563	-1.86882	0.0616473	0.591162	0.291526	0.137946	#N/A	0.68259
APOE	3685.82	-0.872993	0.467073	-1.86907	0.0616126	0.591162	0.546013	0.00874697	#N/A	0.0018685
LOX	8849.15	0.437616	0.234109	1.86928	0.0615833	0.591162	1.35436	1.59434	#N/A	0.98769
NME5	53.4346	-5.09621	2.72588	-1.86956	0.0615445	0.591162	0.029234	#N/A	#N/A	0.00067197
AAED1	497.7	-2.14049	1.14489	-1.86959	0.0615401	0.591162	0.226803	#N/A	#N/A	1.01e-07
CYR61	6504.33	0.575468	0.308889	1.86302	0.0624588	0.591512	1.49016	#N/A	#N/A	0.71388
BCL9	708.491	1.25148	0.671849	1.86274	0.0624992	0.591512	2.38085	#N/A	#N/A	0.49607
RPL41	11435.9	-0.482425	0.258228	-1.86821	0.0617326	0.591512	0.715773	#N/A	#N/A	0.18377
B3GLCT	755.533	1.43078	0.766851	1.86579	0.0620708	0.591512	2.69593	#N/A	#N/A	#N/A
CTDSPL2	1802.8	-0.98399	0.528241	-1.86277	0.0624952	0.591512	0.50558	-1.97863	#N/A	0.99966
ITFG1	3447.75	0.634861	0.340531	1.86433	0.062276	0.591512	1.55279	0.0112292	#N/A	0.071163
SEH1L	549.488	-1.75756	0.942855	-1.86408	0.0623107	0.591512	0.295749	0.298053	#N/A	0.14936
EFHD1	830.551	-1.24048	0.66568	-1.86348	0.0623952	0.591512	0.423232	-2.71635	#N/A	0.0051487
PMEPA1	7483.29	0.545135	0.292384	1.86445	0.0622584	0.591512	1.45916	#N/A	#N/A	0.93577
PIGZ	173.866	-3.01522	1.61431	-1.8678	0.0617896	0.591512	0.123688	#N/A	#N/A	1.2688e-05
TTBK1	29.7058	5.58669	2.99265	1.86681	0.0619287	0.591512	48.0576	#N/A	#N/A	0.99967
SMAP1	1592.52	-0.837383	0.448568	-1.86679	0.0619308	0.591512	0.559658	1.00142	#N/A	0.99357
CEP57L1	454.723	-2.68825	1.44199	-1.86427	0.0622843	0.591512	0.155151	#N/A	#N/A	2.81e-08
NUP43	1456.1	-0.923347	0.494856	-1.86589	0.0620569	0.591512	0.527284	0.286267	#N/A	2.4136e-05
RALA	2176.92	-0.795663	0.426242	-1.86669	0.0619445	0.591512	0.576078	0.556672	#N/A	0.97289
CTTNBP2	137.602	2.64922	1.42094	1.86441	0.0622644	0.591512	6.27327	#N/A	1	1.72e-11
LONRF1	1753.04	-0.955386	0.512774	-1.86317	0.0624379	0.591512	0.515704	#N/A	#N/A	0.61157
LINC00339	187.601	-3.28296	1.76532	-1.85969	0.0629287	0.592118	0.102738	#N/A	#N/A	#N/A
NOP2	423.342	1.74389	0.937074	1.86099	0.062745	0.592118	3.34937	1.6767	#N/A	0.99996
AC009119.2	12.1129	-7.274	3.91067	-1.86004	0.0628799	0.592118	0.00646112	#N/A	#N/A	#N/A
CLASRP	208.608	2.84239	1.5283	1.85984	0.0629082	0.592118	7.17208	#N/A	#N/A	0.43077
MMADHC	5721.45	0.539467	0.290104	1.85956	0.0629473	0.592118	1.45344	#N/A	1	2.071e-05
CNOT9	2094.67	-0.737901	0.396644	-1.86036	0.0628344	0.592118	0.599611	-0.190898	#N/A	#N/A
ZFR	1501.12	-1.08416	0.582791	-1.86029	0.0628448	0.592118	0.471667	0.386224	#N/A	1
SYBU	721.727	1.24948	0.671861	1.85973	0.0629233	0.592118	2.37756	#N/A	#N/A	9.7732e-05
ACOT7	2451.94	0.716158	0.385357	1.85843	0.0631083	0.592831	1.6428	1.19002	#N/A	0.75926
FAM98B	1471.11	1.17591	0.632771	1.85835	0.0631193	0.592831	2.25935	-0.237788	#N/A	0.010312
MBP	968.255	1.20534	0.648905	1.85749	0.0632409	0.593521	2.30591	#N/A	#N/A	0.28446
SLC35D1	973.441	1.08	0.581586	1.85699	0.0633124	0.59374	2.11404	#N/A	#N/A	0.00035546
FAM43B	232.321	-2.91548	1.57295	-1.85351	0.0638086	0.597607	0.132542	#N/A	#N/A	0.10664
SLC39A8	72.6666	-3.8078	2.05447	-1.85342	0.0638216	0.597607	0.0714067	#N/A	#N/A	0.66924
GPR153	1322.67	-1.06933	0.577518	-1.85159	0.0640849	0.599511	0.476542	#N/A	#N/A	6.88e-07
NOSIP	1101.25	0.936955	0.506233	1.85084	0.0641928	0.599511	1.91448	5.39083	#N/A	1.2622e-05
HEATR5B	532.707	-1.66634	0.900569	-1.85032	0.064268	0.599511	0.315052	#N/A	#N/A	3.07e-22
KPNA5	166.055	2.9714	1.6058	1.85042	0.0642533	0.599511	7.84299	#N/A	#N/A	0.00013525
ATP6V1C1	625.657	1.91151	1.033	1.85045	0.0642489	0.599511	3.76202	0.886859	#N/A	0.00015353
C4orf48	5219.72	0.550761	0.297731	1.84986	0.0643337	0.599669	1.46486	#N/A	#N/A	0.51423
SDCCAG8	553.831	-1.37084	0.742167	-1.84708	0.0647359	0.602963	0.386666	#N/A	#N/A	1.18e-11
GRIN2D	786.862	1.44035	0.781079	1.84406	0.065175	0.605224	2.71387	#N/A	#N/A	0.99996
OSBP2	573.054	1.7665	0.957907	1.84412	0.0651651	0.605224	3.40227	#N/A	#N/A	0.00043434
SLC18B1	1111.15	-1.09453	0.593479	-1.84426	0.065145	0.605224	0.468288	#N/A	#N/A	1.02e-17
PRKX	585.706	-1.69311	0.917994	-1.84435	0.0651315	0.605224	0.30926	#N/A	#N/A	0.032585
C19orf48	487.354	1.91905	1.04112	1.84327	0.0652903	0.605383	3.78175	#N/A	#N/A	NA
FBXO45	834.469	1.34688	0.730618	1.84348	0.0652597	0.605383	2.54361	#N/A	#N/A	0.97063
BTG1	8399.54	-0.77673	0.421818	-1.84138	0.0655653	0.606565	0.583688	#N/A	#N/A	0.53641
ZNF506	484.742	2.53675	1.37752	1.84153	0.0655441	0.606565	5.8028	#N/A	#N/A	1.66e-09
PCMT1	3792.61	0.595985	0.323612	1.84167	0.0655239	0.606565	1.5115	-0.386725	#N/A	0.78453
FAAP100	1676.32	1.04564	0.568039	1.8408	0.0656512	0.606904	2.06429	#N/A	#N/A	#N/A
FAM212B-AS1	25.2352	6.42722	3.49234	1.84038	0.0657131	0.606978	86.0568	#N/A	#N/A	#N/A
SNHG14	2913.72	-0.67561	0.367165	-1.84007	0.0657576	0.606978	0.626067	#N/A	#N/A	#N/A
RAPGEFL1	153.189	-3.02904	1.64663	-1.83953	0.0658369	0.607256	0.122509	#N/A	#N/A	0.29662
DHX15	3899.77	-0.658146	0.358079	-1.83799	0.0660639	0.608894	0.633692	0.19851	#N/A	1
TTC9B	606.265	1.75697	0.956395	1.83708	0.0661979	0.609218	3.37989	#N/A	#N/A	0.21638
CORO2A	29.5225	6.12684	3.33457	1.83737	0.0661556	0.609218	69.8815	#N/A	#N/A	3.45e-10
TMEM52	196.051	-3.02658	1.65054	-1.83369	0.0666997	0.609666	0.122718	#N/A	#N/A	0.014909
FZR1	4428.33	0.536026	0.291926	1.83617	0.0663323	0.609666	1.44997	#N/A	#N/A	0.99969
MAP3K20	1725.15	-0.818682	0.446395	-1.83399	0.0666561	0.609666	0.56696	2.2748	#N/A	#N/A
SMIM4	531.629	1.44974	0.790732	1.83341	0.0667409	0.609666	2.73159	#N/A	#N/A	0.19943
LETM1	1412.27	0.910396	0.496238	1.8346	0.0665657	0.609666	1.87956	0.568419	#N/A	1.21e-06
MTMR12	889.92	1.07162	0.583819	1.83553	0.0664273	0.609666	2.10179	#N/A	#N/A	0.99638
DHX29	2644.13	-0.717266	0.391125	-1.83385	0.0666757	0.609666	0.608249	-0.648231	#N/A	3.77e-09
SMAD5	3158.72	-0.677237	0.369176	-1.83446	0.0665865	0.609666	0.625362	#N/A	#N/A	0.99838
HLA-B	554.352	1.32442	0.722109	1.8341	0.0666393	0.609666	2.50432	1.35095	#N/A	3.8642e-05
TBL2	1402.42	0.85639	0.467068	1.83355	0.0667214	0.609666	1.8105	0.8898	#N/A	0.00018452
ZNF226	621.954	1.54201	0.842812	1.8296	0.0673101	0.613485	2.91199	#N/A	#N/A	5.24e-15
ZIK1	581.74	1.49466	0.8172	1.829	0.0673993	0.613485	2.81798	#N/A	#N/A	2.7592e-05
ENTPD6	1545.83	1.00449	0.549025	1.82959	0.0673119	0.613485	2.00623	#N/A	#N/A	1.18e-06
ST13	7293.98	-0.478665	0.261598	-1.82977	0.0672843	0.613485	0.717641	-0.0275468	#N/A	0.66074
AC144530.1	1632.22	-0.843295	0.461082	-1.82895	0.0674078	0.613485	0.557369	#N/A	#N/A	#N/A
AC091563.1	193.106	-2.79967	1.5311	-1.82853	0.0674694	0.613593	0.14362	#N/A	#N/A	#N/A
NAPB	768.778	1.66613	0.911395	1.82811	0.0675334	0.613723	3.17362	2.472	#N/A	0.11216
MRPL16	1207.07	0.933305	0.511336	1.82523	0.0679666	0.613866	1.90965	0.00985155	#N/A	2.4706e-05
GOLT1B	1877.64	0.835335	0.457559	1.82563	0.0679053	0.613866	1.78427	#N/A	#N/A	0.85264
ARID4A	356.596	-2.27495	1.24557	-1.82643	0.0677856	0.613866	0.206619	#N/A	#N/A	1
ZFP36L1	24377.7	-0.335426	0.183572	-1.82722	0.0676665	0.613866	0.79255	-4.88916	#N/A	0.67406
PRSS53	897.298	-1.15331	0.631368	-1.82668	0.0677473	0.613866	0.449593	#N/A	#N/A	9.35e-17
ZNF646	898.556	-1.15081	0.630572	-1.82503	0.0679972	0.613866	0.450372	#N/A	#N/A	6.78e-06
BMP2K	681.111	-1.75721	0.96278	-1.82514	0.0679797	0.613866	0.29582	#N/A	#N/A	0.21901
AIMP1	928.766	-1.57038	0.860191	-1.82561	0.0679084	0.613866	0.336721	-0.162122	1	3.04e-07
CLGN	485.931	1.84889	1.01269	1.82573	0.0678908	0.613866	3.60224	#N/A	#N/A	1.28e-11
RPL7AP50	12970.7	-0.443018	0.242857	-1.82419	0.0681234	0.614556	0.735594	#N/A	#N/A	#N/A
MKL1	870.856	1.07489	0.589439	1.82359	0.0682146	0.614929	2.10657	#N/A	#N/A	0.99768
ORMDL2	1316.47	1.25645	0.689667	1.82182	0.0684826	0.616287	2.38907	2.71904	#N/A	0.19417
TMEM199	714.945	1.29423	0.710255	1.82221	0.0684238	0.616287	2.45246	#N/A	#N/A	1.9938e-05
FZD5	236.482	-2.59974	1.42734	-1.82139	0.0685483	0.616287	0.164969	#N/A	#N/A	0.98255
AL669983.1	7965.8	-0.712286	0.391092	-1.82127	0.0685651	0.616287	0.610352	#N/A	#N/A	#N/A
C10orf88	59.055	-4.35427	2.39219	-1.8202	0.0687286	0.616857	0.0488917	#N/A	#N/A	0.012888
KIF1C	3083.24	0.765315	0.420457	1.8202	0.0687286	0.616857	1.69974	#N/A	#N/A	0.71767
LINC02388	240.139	2.10238	1.15575	1.81905	0.0689032	0.617525	4.29416	#N/A	#N/A	#N/A
PMS2CL	74.597	-4.12678	2.26843	-1.81923	0.068877	0.617525	0.0572422	#N/A	#N/A	#N/A
DLX6-AS1	822.68	-3.72047	2.04565	-1.81872	0.0689543	0.617534	0.0758624	#N/A	#N/A	#N/A
GOLGA7B	1125.53	1.29698	0.713423	1.81796	0.0690697	0.618119	2.45713	#N/A	#N/A	0.00599
BTBD11	428.667	2.02072	1.11223	1.81682	0.069244	0.618332	4.05788	#N/A	#N/A	0.99993
ELAC2	666.713	-1.25179	0.688974	-1.81689	0.069234	0.618332	0.419927	0.744137	#N/A	1.72e-20
PEPD	1846.03	0.781605	0.430069	1.81739	0.0691569	0.618332	1.71904	0.0829776	1	1.46e-14
WARS	3034.28	-0.610022	0.335965	-1.81573	0.0694123	0.61909	0.655187	-0.0846506	#N/A	0.30288
RTL8B	1111.91	1.00479	0.553416	1.81562	0.0694293	0.61909	2.00665	#N/A	#N/A	#N/A
PSME3	2101.11	0.901656	0.496823	1.81484	0.0695483	0.619703	1.86821	-0.437047	#N/A	0.99714
MAP3K3	249.894	2.14631	1.18413	1.81257	0.0698981	0.622371	4.42695	0.711679	#N/A	0.98535
LNX1	777.494	-1.49568	0.825712	-1.81138	0.0700814	0.623553	0.354613	#N/A	#N/A	2e-06
PCSK1	1072.73	0.993946	0.548832	1.81102	0.0701377	0.623603	1.99162	#N/A	#N/A	2.75e-09
AC239868.4	129.984	3.26666	1.80411	1.81067	0.0701913	0.623631	9.62417	#N/A	#N/A	#N/A
KLF5	736.971	-1.3613	0.752233	-1.80968	0.0703458	0.624553	0.389232	#N/A	#N/A	0.8181
FNBP4	929.534	-1.18292	0.653887	-1.80906	0.0704421	0.624958	0.440459	#N/A	#N/A	1
C1orf131	351.271	2.4579	1.36065	1.80642	0.0708531	0.625509	5.49417	#N/A	#N/A	4.41e-11
CSGALNACT2	1337.72	-1.1605	0.642448	-1.80638	0.0708592	0.625509	0.447356	#N/A	#N/A	0.23766
SEC23IP	1436.47	0.860937	0.476365	1.8073	0.0707148	0.625509	1.81622	-0.24465	#N/A	1.9318e-05
GINS2	677.798	-1.24153	0.6873	-1.80639	0.070857	0.625509	0.422923	#N/A	#N/A	1.57e-08
PSMD3	8958.53	0.404249	0.223639	1.80759	0.0706697	0.625509	1.3234	-0.136338	#N/A	0.99997
RPS5	57135.7	-0.365246	0.202126	-1.80703	0.0707581	0.625509	0.776336	0.223473	#N/A	0.94764
VCP	9324.15	0.390601	0.216066	1.80778	0.0706403	0.625509	1.31094	-0.173778	#N/A	0.99999
MALAT1	169127	-0.921411	0.510222	-1.8059	0.0709335	0.625588	0.527992	#N/A	#N/A	#N/A
COL9A3	757.745	-1.23227	0.682442	-1.80567	0.0709696	0.625588	0.425648	#N/A	#N/A	3.28e-12
HNRNPK	25516.5	-0.341564	0.189299	-1.80436	0.0711751	0.626951	0.789186	0.139644	#N/A	0.99998
RAB4A	2118.91	-0.759597	0.421292	-1.80302	0.0713853	0.627011	0.590661	-1.3212	#N/A	0.2026
MAP2K6	107.717	3.33132	1.84732	1.80333	0.0713366	0.627011	10.0653	#N/A	#N/A	0.91334
NCAPH2	906.997	1.48821	0.82519	1.80348	0.071313	0.627011	2.80541	#N/A	#N/A	0.00028787
CASC9	239.49	2.83857	1.57428	1.80309	0.071374	0.627011	7.15312	#N/A	#N/A	#N/A
GPATCH4	278.927	2.30398	1.28082	1.79883	0.0720452	0.627556	4.93818	#N/A	#N/A	5.6931e-05
MOB2	400.77	1.92799	1.07033	1.8013	0.0716553	0.627556	3.80526	-0.90658	#N/A	0.051345
FJX1	916.501	-1.18051	0.655356	-1.80133	0.0716506	0.627556	0.441194	#N/A	#N/A	0.94412
C11orf54	721.908	-1.4068	0.781749	-1.79955	0.0719312	0.627556	0.377147	-1.25869	#N/A	2.87e-08
ENSG00000183405	19890.5	-0.541749	0.301096	-1.79925	0.0719784	0.627556	0.686938	#N/A	#N/A	#N/A
SNX11	494.001	1.71136	0.951244	1.79908	0.0720062	0.627556	3.2747	#N/A	#N/A	7.3e-07
RELB	394.317	-2.50581	1.39303	-1.79882	0.0720471	0.627556	0.176066	#N/A	#N/A	0.994
SCARF2	4187.77	0.61658	0.342173	1.80195	0.071553	0.627556	1.53324	-3.83265	#N/A	0.9998
ALCAM	2712.82	0.707797	0.393004	1.80099	0.0717044	0.627556	1.63331	1.19342	#N/A	0.73267
ENSG00000271359	12.6542	7.04	3.90982	1.80059	0.071767	0.627556	131.599	#N/A	#N/A	#N/A
ZC2HC1A	2740.08	-0.644304	0.358195	-1.79875	0.072058	0.627556	0.639801	0.800871	#N/A	0.30952
PHPT1	9697.13	0.411695	0.228768	1.79962	0.0719212	0.627556	1.33025	0.319556	#N/A	6.427e-05
DCLK1	1704.57	-0.841423	0.467972	-1.79802	0.0721737	0.62812	0.558093	0.793325	#N/A	0.99964
HSPA1A	153.44	2.86978	1.597	1.79698	0.0723388	0.629113	7.30955	-0.0220301	#N/A	0.030228
BBS10	602.983	-1.38277	0.769935	-1.79596	0.0725004	0.630074	0.383481	#N/A	1	1.75e-12
MYBPH	645.156	-4.46788	2.4893	-1.79484	0.0726796	0.630742	0.045189	-9.02885	#N/A	2.25e-13
TRAF3IP2	416.859	-1.46842	0.818087	-1.79495	0.072662	0.630742	0.361377	#N/A	#N/A	1.62e-09
LDLR	1532.82	-0.989576	0.551553	-1.79416	0.0727872	0.631232	0.503626	#N/A	#N/A	9.84e-24
THYN1	4128.59	-0.527949	0.294367	-1.79351	0.0728921	0.631698	0.69354	-0.63753	#N/A	1.97e-16
EBP	284.386	2.61121	1.45634	1.79299	0.0729747	0.631969	6.11016	0.288862	1	0.93645
PPP2R5E	2926.61	-0.807819	0.450852	-1.79176	0.0731713	0.633227	0.571245	0.335287	#N/A	0.99997
RNF145	4047.42	0.664946	0.371202	1.79133	0.0732406	0.633382	1.58551	#N/A	#N/A	0.98031
UCHL3	673.11	1.62311	0.906528	1.79046	0.0733793	0.634137	3.08037	-0.0318781	#N/A	3.34e-08
PIK3CB	833.468	1.19666	0.66856	1.7899	0.0734699	0.634313	2.29208	#N/A	#N/A	0.99964
GMDS	1629.67	-0.857139	0.47893	-1.7897	0.0735026	0.634313	0.552046	-0.667137	#N/A	0.99132
IGSF3	3027.32	-0.648402	0.362625	-1.78808	0.0737628	0.634782	0.637986	0.314185	#N/A	0.26474
ZNF106	1556.04	-0.986642	0.55162	-1.78862	0.0736752	0.634782	0.504651	#N/A	#N/A	0.00010529
PAFAH1B1	4625.53	0.506815	0.283438	1.7881	0.07376	0.634782	1.42091	0.197377	1	0.99995
2020-09-10	1485.68	-1.12919	0.631237	-1.78885	0.0736395	0.634782	0.457174	-1.28464	#N/A	4.74e-10
MXI1	1737.67	-0.865529	0.484251	-1.78736	0.0738798	0.634903	0.548845	#N/A	#N/A	0.0011217
AMD1	2380.98	-0.661564	0.370117	-1.78745	0.0738652	0.634903	0.632192	#N/A	#N/A	0.98227
RAB3IL1	703.013	-1.46513	0.820968	-1.78464	0.0743199	0.636025	0.362203	#N/A	#N/A	0.00036755
SIRT4	123.204	4.05562	2.27214	1.78493	0.0742728	0.636025	16.6289	#N/A	#N/A	6.86e-10
AL049838.1	875.858	-1.65404	0.92662	-1.78502	0.0742577	0.636025	0.31775	#N/A	#N/A	#N/A
RNF135	142.522	-3.42625	1.91892	-1.78551	0.074179	0.636025	0.0930245	#N/A	#N/A	2.2e-09
TMEM200A	1071.19	1.11122	0.622302	1.78566	0.074154	0.636025	2.16028	#N/A	#N/A	0.85062
C7orf50	5730.87	0.483278	0.270778	1.78477	0.0742981	0.636025	1.39792	0.674778	#N/A	3.42e-06
JMY	1425.58	-0.853233	0.478296	-1.7839	0.0744396	0.636609	0.553543	#N/A	#N/A	0.96031
HAS3	273.25	2.21356	1.24141	1.7831	0.0745694	0.637277	4.6382	#N/A	#N/A	0.88316
TRIM45	293.275	-2.01938	1.13299	-1.78235	0.0746924	0.637578	0.246665	#N/A	#N/A	2.06e-08
ANKRD54	906.104	1.72512	0.968114	1.78193	0.0747598	0.637578	3.30607	#N/A	#N/A	0.002006
TCEAL1	550.951	-1.44946	0.8133	-1.7822	0.0747169	0.637578	0.366158	#N/A	#N/A	0.58578
GCN1	1312.86	-0.927309	0.520719	-1.78083	0.074941	0.638288	0.525838	0.176219	#N/A	#N/A
KIAA0141	875.891	-1.02346	0.574823	-1.78047	0.0749984	0.638288	0.491936	#N/A	#N/A	1.22e-17
MRPL50	1132.11	0.918584	0.515873	1.78064	0.0749711	0.638288	1.89026	-0.069641	#N/A	3.8088e-05
ZADH2	576.487	-1.38784	0.780113	-1.77903	0.0752355	0.638868	0.382136	#N/A	#N/A	0.002543
MAP9	654.169	1.95582	1.09945	1.77892	0.0752536	0.638868	3.87937	#N/A	#N/A	2.54e-15
LATS1	1244.97	-0.959619	0.539477	-1.77879	0.0752737	0.638868	0.514193	#N/A	#N/A	0.99987
RBBP7	4992.61	-0.604299	0.339691	-1.77897	0.0752452	0.638868	0.657791	0.445186	#N/A	0.98393
FIGN	323.609	-2.06272	1.15988	-1.77839	0.0753397	0.638988	0.239364	#N/A	1	0.98917
KCNAB2	94.9505	3.85365	2.16987	1.77598	0.0757362	0.639315	14.4565	#N/A	#N/A	0.79978
SC5D	2824.37	0.640754	0.360514	1.77734	0.0755127	0.639315	1.55914	#N/A	#N/A	0.0025941
ZFAND6	1246.71	-0.86701	0.488164	-1.77606	0.0757228	0.639315	0.548282	1.33547	#N/A	0.46236
TMEM128	1770.12	-1.0369	0.583657	-1.77656	0.0756403	0.639315	0.487373	#N/A	#N/A	0.00019994
KIT	108.425	3.47482	1.95659	1.77595	0.0757411	0.639315	11.1179	#N/A	#N/A	0.98087
POLR2J	3555.22	0.66944	0.376799	1.77665	0.0756257	0.639315	1.59046	1.18938	#N/A	0.0071512
MRPL13	1581.54	1.0941	0.615953	1.77627	0.0756892	0.639315	2.13479	0.320335	#N/A	1.43e-07
CEP170	1532.4	-0.895537	0.504457	-1.77525	0.0758564	0.63985	0.537547	0.315708	#N/A	1
NCOA6	655.528	1.21901	0.686794	1.77493	0.0759098	0.639863	2.32787	#N/A	#N/A	0.99913
TMEM163	500.153	-2.12935	1.2001	-1.77431	0.0760125	0.640291	0.22856	#N/A	#N/A	0.039734
BRF2	4052.32	-0.637251	0.359293	-1.77363	0.076125	0.640801	0.642937	#N/A	#N/A	3.75e-12
IGSF8	575.528	1.30179	0.734332	1.77276	0.0762691	0.641576	2.46535	3.58232	#N/A	4.63e-11
ASPM	183.75	2.7321	1.54194	1.77186	0.0764183	0.641869	6.64422	0.328204	1	3.35e-49
R3HCC1L	81.5335	3.73222	2.10648	1.77178	0.0764317	0.641869	13.2895	#N/A	#N/A	1.26e-09
TBC1D9	2000.03	0.820008	0.462861	1.77161	0.07646	0.641869	1.76542	#N/A	#N/A	2.8039e-05
ZNF738	795.592	-1.06898	0.603565	-1.77111	0.076543	0.642002	0.476656	#N/A	#N/A	0.042023
GLO1	6140.06	-0.551941	0.31173	-1.77057	0.0766321	0.642002	0.682102	-0.142185	#N/A	9.67e-07
CNOT7	3886.66	0.542316	0.30628	1.77065	0.0766188	0.642002	1.45631	0.363577	#N/A	0.99686
ESPL1	96.361	3.80885	2.15431	1.76801	0.0770588	0.643672	14.0145	#N/A	#N/A	1
VAT1	10663.8	0.395485	0.223593	1.76878	0.0769312	0.643672	1.31539	1.0412	#N/A	0.0054627
HYAL2	2695.06	0.693973	0.392418	1.76845	0.076985	0.643672	1.61773	#N/A	#N/A	0.18682
TOMM6	5936.71	-0.526835	0.298068	-1.7675	0.0771446	0.643672	0.694076	#N/A	#N/A	0.19403
ADGRA2	4054.64	-0.635148	0.359326	-1.76761	0.0771264	0.643672	0.643875	#N/A	#N/A	#N/A
EIF4EBP1	2385.29	-0.692329	0.391649	-1.76773	0.0771058	0.643672	0.618854	-1.17735	#N/A	0.20762
ZNF189	1335.14	-1.12978	0.639361	-1.76705	0.0772194	0.643861	0.456984	#N/A	#N/A	0.0010884
RAPGEF4	311.358	-2.82321	1.59825	-1.76644	0.0773228	0.644287	0.141296	#N/A	#N/A	0.99218
NEXN	1456.55	-1.17086	0.663205	-1.76546	0.0774873	0.645222	0.444157	-1.47753	#N/A	3.91e-11
LOC145783	43.7037	4.74726	2.6899	1.76485	0.0775892	0.645276	26.8577	#N/A	#N/A	#N/A
SLFN5	1972.55	-0.836043	0.473901	-1.76417	0.0777031	0.645276	0.560178	-0.300219	#N/A	1.7e-12
ZNF616	197.363	2.73574	1.55032	1.76463	0.0776258	0.645276	6.66103	#N/A	#N/A	0.0080095
TRUB2	758.892	-1.35894	0.770237	-1.76431	0.0776796	0.645276	0.389869	#N/A	#N/A	3.79e-06
MEIS2	1239.15	-0.909594	0.515814	-1.76341	0.0778308	0.645467	0.532335	#N/A	#N/A	0.99938
KDELR2	16903	0.318369	0.180535	1.76347	0.0778207	0.645467	1.24692	0.353699	#N/A	0.16699
ZNF219	1617.56	0.839721	0.476389	1.76268	0.0779544	0.645624	1.7897	#N/A	#N/A	0.99977
RALGAPA1	387.634	1.51945	0.861955	1.7628	0.0779351	0.645624	2.86682	3.75489	#N/A	0.99999
RPS15AP38	954.953	-1.10414	0.62685	-1.7614	0.0781702	0.646976	0.465181	#N/A	#N/A	#N/A
RASGRF2	339.191	-2.05284	1.1657	-1.76104	0.0782319	0.647053	0.241008	#N/A	#N/A	0.15243
PRRX1	5742.09	-0.605088	0.343927	-1.75935	0.0785178	0.648718	0.657431	-0.895604	#N/A	0.24291
POPDC3	123.081	3.55027	2.01808	1.75923	0.0785384	0.648718	11.7149	#N/A	#N/A	0.010916
NCAPD3	168.817	-2.4655	1.40209	-1.75844	0.0786724	0.64939	0.181055	#N/A	#N/A	5.82e-09
HTATSF1	2282.73	0.841347	0.478999	1.75647	0.0790083	0.651726	1.79172	0.563754	#N/A	0.9974
MKI67	825.425	-1.02237	0.582182	-1.7561	0.0790717	0.651813	0.492307	#N/A	#N/A	1.26e-28
ITGAE	1460.93	0.847473	0.482851	1.75514	0.0792346	0.652012	1.79935	#N/A	#N/A	3.92e-20
AC005288.1	745.839	1.58693	0.904082	1.75529	0.0792093	0.652012	3.00409	#N/A	#N/A	#N/A
IL11RA	718.087	-1.36053	0.775219	-1.75503	0.0792544	0.652012	0.389439	#N/A	#N/A	6.29e-21
PSME1	3328.35	-0.644647	0.367379	-1.75472	0.0793076	0.652014	0.639649	-0.583188	#N/A	0.13197
GALC	393.491	-1.70182	0.97039	-1.75375	0.0794741	0.652637	0.307399	#N/A	#N/A	5.21e-15
RPL35A	18370.2	-0.425153	0.242438	-1.75366	0.0794892	0.652637	0.74476	0.0333177	#N/A	0.89535
SEMA3B	416.512	-2.07838	1.18539	-1.75334	0.0795438	0.652651	0.23678	#N/A	#N/A	#N/A
TTF1	600.788	1.29834	0.740647	1.75298	0.0796057	0.652725	2.45945	#N/A	#N/A	6.21e-13
PHF13	1740.96	-0.716706	0.409152	-1.75169	0.0798275	0.654108	0.608485	#N/A	#N/A	0.98042
KIFAP3	755.981	1.19776	0.684331	1.75027	0.080072	0.654308	2.29384	3.73099	#N/A	1.5803e-05
NOC4L	447.272	1.59285	0.909781	1.75081	0.0799786	0.654308	3.01646	#N/A	#N/A	0.0010792
ARGLU1	3398.57	-0.647683	0.370103	-1.75001	0.0801172	0.654308	0.638305	0.405566	#N/A	0.86183
MSC	3089.1	0.5752	0.328495	1.75101	0.0799434	0.654308	1.48988	#N/A	#N/A	0.024651
ELAVL2	1692.67	1.30917	0.747875	1.75052	0.0800284	0.654308	2.47799	-0.0992614	#N/A	0.99514
PPP3CC	260.109	2.43257	1.39074	1.74913	0.0802691	0.654682	5.39855	1.10479	#N/A	0.26374
PGK1	6409.88	-0.468791	0.268014	-1.74913	0.0802688	0.654682	0.72257	0.0224634	1	0.76537
ARIH2	2412.66	-0.698587	0.399599	-1.74822	0.0804255	0.655523	0.616175	#N/A	#N/A	0.99374
AKT3	1192.48	-1.11423	0.637729	-1.74718	0.0806053	0.656555	0.461937	1.44198	1	0.99958
FAM89A	79.4611	2.98622	1.71229	1.744	0.0811597	0.657364	7.92397	#N/A	#N/A	0.25672
AIFM2	985.092	-1.10626	0.634486	-1.74355	0.0812377	0.657364	0.464497	2.06115	#N/A	1.1064e-05
FANCA	293.088	-2.42362	1.39004	-1.74356	0.081235	0.657364	0.186388	#N/A	#N/A	1.59e-68
PDE4A	204.55	-2.96166	1.69839	-1.7438	0.081194	0.657364	0.128367	#N/A	#N/A	0.98167
TMEM42	345.304	-1.9048	1.09193	-1.74443	0.0810842	0.657364	0.267054	#N/A	#N/A	0.080845
AC092965.1	51.4888	4.4516	2.55218	1.74423	0.0811189	0.657364	21.8808	#N/A	#N/A	#N/A
LMBRD2	706.751	-1.39406	0.798376	-1.74612	0.0807894	0.657364	0.380492	#N/A	#N/A	0.00016404
HMGN4	2859.42	-0.635216	0.364168	-1.74429	0.0811081	0.657364	0.643844	-0.14441	#N/A	0.31986
CAV2	1486.59	1.05456	0.604525	1.74445	0.0810808	0.657364	2.07709	#N/A	#N/A	0.026973
SLC20A2	1943.94	0.713613	0.40923	1.74379	0.0811951	0.657364	1.63991	#N/A	#N/A	0.96545
DNAJC6	1536.95	1.10791	0.635675	1.74289	0.0813524	0.65743	2.15534	5.24487	#N/A	0.99986
LAPTM4A	38690.4	-0.359585	0.206279	-1.7432	0.0812993	0.65743	0.779389	#N/A	#N/A	0.0042449
TAF10	4031.49	0.59658	0.342769	1.74047	0.0817761	0.658146	1.51213	1.40034	#N/A	0.88076
SIX4	926.243	-1.10287	0.633343	-1.74135	0.0816225	0.658146	0.465589	#N/A	#N/A	0.69464
HDGFRP2	6018.48	-0.549809	0.315934	-1.74027	0.0818123	0.658146	0.683111	#N/A	#N/A	0.77498
KMT2B	1051.57	-1.1163	0.641457	-1.74025	0.0818147	0.658146	0.461276	#N/A	#N/A	1
MAPK11	440.146	-1.68191	0.965867	-1.74134	0.0816232	0.658146	0.31167	#N/A	#N/A	0.00033565
SFMBT1	484.167	-1.55927	0.895998	-1.74026	0.0818128	0.658146	0.339322	#N/A	#N/A	0.93588
WDR5	3260.82	-0.584688	0.335858	-1.74088	0.0817052	0.658146	0.666794	0.886121	#N/A	0.99978
KAT6B	756.392	-1.37884	0.793308	-1.73809	0.0821946	0.660126	0.384527	#N/A	1	1
ARHGDIB	197.611	3.11495	1.79232	1.73794	0.0822214	0.660126	8.66348	#N/A	#N/A	0.0006377
SPOCK1	4912.16	0.594326	0.341909	1.73826	0.0821656	0.660126	1.50977	#N/A	#N/A	0.82592
DDR2	4927.1	-0.55829	0.321524	-1.73639	0.0824956	0.661897	0.679107	#N/A	#N/A	0.5503
RASAL2	1110.27	1.21895	0.702374	1.73547	0.0826579	0.662337	2.32777	#N/A	#N/A	0.79641
SPTLC1	3663.08	0.51697	0.297884	1.73548	0.0826567	0.662337	1.43095	0.316543	#N/A	4.19e-11
NIT1	1118.81	1.17381	0.676493	1.73514	0.0827162	0.662374	2.25607	-0.440663	#N/A	8.94e-07
ACTG2	16695.6	0.570627	0.329112	1.73383	0.0829475	0.66375	1.48517	#N/A	#N/A	0.071036
CCDC66	316.353	-1.99194	1.14904	-1.73356	0.0829956	0.66375	0.2514	#N/A	#N/A	5.61e-36
TRAF6	428.252	1.85798	1.0728	1.73191	0.0832898	0.665239	3.62501	-1.179	#N/A	0.99739
ARPP19	7900.41	0.472869	0.272987	1.7322	0.0832373	0.665239	1.38787	-0.533485	#N/A	0.77371
SUPT3H	305.552	-2.47342	1.42875	-1.73118	0.0834202	0.665419	0.180064	#N/A	#N/A	3.24e-11
MFSD4B	87.5963	3.6296	2.09633	1.7314	0.0833796	0.665419	12.3771	#N/A	#N/A	#N/A
AGMAT	415.532	-1.49769	0.867667	-1.72611	0.0843273	0.666619	0.35412	#N/A	#N/A	1.24e-07
B4GALT2	6261.01	0.476135	0.275616	1.72753	0.0840726	0.666619	1.39101	#N/A	#N/A	0.19829
SNRPE	10523.7	-0.389311	0.225292	-1.72803	0.0839829	0.666619	0.763494	5.39836	#N/A	0.90614
CNIH2	646.534	1.23893	0.717755	1.72612	0.0843253	0.666619	2.36024	#N/A	#N/A	0.95171
RASSF3	1059.14	-0.917681	0.531554	-1.72641	0.0842735	0.666619	0.529359	#N/A	#N/A	1.7804e-05
RPS20P2	7161.27	-0.659535	0.381697	-1.7279	0.084006	0.666619	0.633082	#N/A	#N/A	#N/A
TEPSIN	105.347	3.24996	1.87906	1.72957	0.0837072	0.666619	9.51337	#N/A	#N/A	#N/A
SLC1A4	1174.78	-0.866385	0.500839	-1.72987	0.0836543	0.666619	0.54852	-0.519758	1	0.06559
FASTKD1	462.595	-1.54961	0.897273	-1.72703	0.0841629	0.666619	0.341602	#N/A	#N/A	4.56e-29
SAP30	933.562	-1.17588	0.681119	-1.72639	0.0842769	0.666619	0.442614	#N/A	#N/A	0.30994
NSUN2	1487.97	-0.942677	0.545691	-1.72749	0.0840794	0.666619	0.520266	-0.359727	1	0.00025826
FUNDC2P1	1647.28	1.05958	0.612875	1.72886	0.083834	0.666619	2.08432	#N/A	#N/A	#N/A
ARF5	8749.42	0.459116	0.265544	1.72896	0.0838159	0.666619	1.3747	0.385951	#N/A	0.94298
TMEM70	857.934	-1.44785	0.837662	-1.72844	0.0839097	0.666619	0.366568	3.75279	#N/A	0.029285
PBX1	13611.2	-0.483975	0.280702	-1.72416	0.0846791	0.66674	0.715005	-0.849081	#N/A	0.99527
PKNOX2	841.833	-1.0779	0.624897	-1.72492	0.0845424	0.66674	0.473719	-1.94241	#N/A	0.99174
KCNA6	79.7357	3.76238	2.18103	1.72504	0.0845199	0.66674	13.5702	#N/A	#N/A	0.49728
FAM227B	901.158	1.01174	0.58688	1.72393	0.0847212	0.66674	2.01634	#N/A	#N/A	4.35e-23
KCNK3	375.517	2.26521	1.31361	1.72441	0.0846333	0.66674	4.80724	#N/A	#N/A	0.90018
UBE2QL1	289.84	2.44923	1.41938	1.72557	0.0844254	0.66674	5.46126	#N/A	#N/A	0.6783
RUNX2	3600.14	0.65686	0.380957	1.72424	0.0846648	0.66674	1.57665	2.4979	#N/A	0.94884
TIMM21	777.417	-1.30109	0.754926	-1.72347	0.0848031	0.666805	0.405818	#N/A	#N/A	9.3324e-05
CASP3	1769	0.800975	0.464796	1.72328	0.0848376	0.666805	1.74228	-0.0169983	#N/A	0.10017
CBX2	598.343	-1.24458	0.722517	-1.72257	0.0849669	0.667193	0.422029	#N/A	#N/A	0.99503
SNX8	1191.02	1.09053	0.633143	1.72241	0.0849952	0.667193	2.12953	0.274687	#N/A	0.062391
OPTN	3058.58	0.685935	0.398366	1.72187	0.085093	0.667446	1.60874	0.658924	#N/A	5.91e-18
NRG3	217.167	2.54893	1.48053	1.72164	0.0851356	0.667446	5.85198	#N/A	#N/A	0.10947
FAM229B	1448.99	1.01503	0.589721	1.7212	0.0852141	0.667637	2.02094	#N/A	#N/A	0.57066
MEN1	2194.33	-0.775676	0.450832	-1.72054	0.0853337	0.66798	0.584115	-2.2334	#N/A	0.99971
DUSP18	91.7747	3.98413	2.31587	1.72036	0.0853663	0.66798	15.825	#N/A	#N/A	0.12048
EFNA2	1135.18	0.895838	0.520931	1.71969	0.0854895	0.668521	1.86069	#N/A	#N/A	0.038008
SNAP47	700.727	-1.08296	0.63077	-1.71689	0.0859992	0.669187	0.472058	#N/A	#N/A	2.0687e-05
DHX37	827.231	1.73222	1.00875	1.71719	0.085945	0.669187	3.32238	#N/A	#N/A	0.99252
SNX33	1161.65	1.02544	0.596663	1.71863	0.0856826	0.669187	2.03558	0.9852	#N/A	0.08407
DOC2A	2310.88	0.681341	0.397064	1.71595	0.0861716	0.669187	1.60363	#N/A	#N/A	0.0067028
PODNL1	1884.13	0.813203	0.47383	1.71624	0.086119	0.669187	1.75711	#N/A	#N/A	4.4e-13
SEC22C	679.857	1.18752	0.691347	1.7177	0.085852	0.669187	2.27762	#N/A	#N/A	2.86e-07
DOK7	195.263	-2.63678	1.53567	-1.71702	0.085975	0.669187	0.160786	#N/A	#N/A	0.00010263
DCUN1D4	1200.61	-0.884791	0.515526	-1.71629	0.0861093	0.669187	0.541566	#N/A	#N/A	0.047486
LOC105377348	139.023	2.78303	1.62075	1.71713	0.0859561	0.669187	6.88295	#N/A	#N/A	#N/A
MARCKS	63174.3	0.294815	0.171755	1.71648	0.0860739	0.669187	1.22673	0.395631	#N/A	0.32648
UBE2A	1680.79	0.768287	0.447187	1.71804	0.0857887	0.669187	1.70325	0.759571	1	0.815
RNMT	2769.66	-0.786295	0.458567	-1.71468	0.0864043	0.670572	0.579831	-0.596189	#N/A	5.6565e-05
ARHGAP26	145.253	2.50131	1.45908	1.7143	0.086473	0.670682	5.66198	#N/A	#N/A	0.99661
CSGALNACT1	88.5785	-2.66896	1.55753	-1.71358	0.0866052	0.671285	0.15724	#N/A	#N/A	9.27e-14
JAKMIP2	329.935	-2.57634	1.50401	-1.71298	0.0867155	0.671718	0.167666	#N/A	#N/A	1
C11orf57	3118.67	0.600528	0.350677	1.71248	0.0868074	0.671845	1.51627	#N/A	#N/A	0.30748
OSTC	9202.75	-0.411214	0.240152	-1.7123	0.0868409	0.671845	0.75199	#N/A	#N/A	0.018353
ARHGAP32	852.232	-1.64227	0.960365	-1.71004	0.0872576	0.674419	0.320353	#N/A	#N/A	0.99978
PAIP2	3919.04	-0.561117	0.328156	-1.70991	0.0872829	0.674419	0.677777	#N/A	#N/A	0.55414
LUM	45671.3	-0.33462	0.195852	-1.70854	0.0875366	0.67511	0.792993	-0.932557	#N/A	0.07696
SPAG7	4326.19	-0.482675	0.282415	-1.7091	0.0874327	0.67511	0.715649	-0.12693	#N/A	0.0006849
DPYSL2	10643.7	0.385635	0.225706	1.70858	0.0875296	0.67511	1.30643	0.58634	#N/A	0.99375
SCYL3	89.5583	3.02361	1.77092	1.70736	0.0877551	0.67578	8.13198	#N/A	#N/A	0.28151
CCDC124	785.917	1.03085	0.603937	1.70689	0.0878426	0.67578	2.04323	-0.0604421	#N/A	0.27576
RPS16	63322.3	-0.370909	0.217301	-1.70689	0.0878424	0.67578	0.773295	0.00580605	#N/A	0.68713
FAM167A	240.664	2.10073	1.23028	1.70752	0.0877253	0.67578	4.28927	#N/A	#N/A	1.02e-11
HSPA14	1141.96	1.1932	0.699379	1.70609	0.0879916	0.676504	2.2866	#N/A	#N/A	0.67359
STX3	891.366	1.13616	0.666618	1.70436	0.0883139	0.678559	2.19795	#N/A	#N/A	0.041297
FADS1	3948.03	-0.617392	0.362976	-1.70092	0.0889587	0.679129	0.651848	#N/A	#N/A	0.37384
SSSCA1	508.679	1.78112	1.04602	1.70276	0.0886128	0.679129	3.43694	0.729285	#N/A	1.84e-07
GNS	3483.53	0.584733	0.344043	1.69959	0.0892075	0.679129	1.49976	-0.506749	1	0.00056441
GCHFR	509.432	1.70218	1.00132	1.69993	0.0891446	0.679129	3.25392	#N/A	#N/A	0.048251
BRD7	2425.18	0.624948	0.366995	1.70288	0.088591	0.679129	1.54216	#N/A	#N/A	0.99774
PITPNC1	1315.33	1.10019	0.646317	1.70225	0.0887091	0.679129	2.14383	#N/A	#N/A	0.99252
DCXR	1821.82	0.728222	0.428351	1.70006	0.0891199	0.679129	1.6566	0.323101	#N/A	8.35e-07
EHD2	3954.88	0.563908	0.331633	1.7004	0.0890566	0.679129	1.47827	-0.989773	#N/A	0.30763
ZNF808	469.231	-1.41791	0.833935	-1.70027	0.0890805	0.679129	0.374253	#N/A	#N/A	0.28866
SIX2	457.579	-1.3789	0.809466	-1.70346	0.0884814	0.679129	0.384513	#N/A	#N/A	0.93869
AMT	103.832	3.09132	1.81732	1.70103	0.0889368	0.679129	8.52273	#N/A	1	0.0027214
RAP2B	2485.95	-0.608014	0.356991	-1.70317	0.0885371	0.679129	0.656099	#N/A	#N/A	0.48658
AIMP2	1717.19	-0.929951	0.546923	-1.70033	0.0890682	0.679129	0.524876	-0.356254	#N/A	0.008024
EGFL7	362.82	-1.93539	1.13876	-1.69956	0.0892142	0.679129	0.26145	#N/A	#N/A	5.55e-18
DIAPH2	123.615	-3.61838	2.12751	-1.70076	0.0889888	0.679129	0.0814255	#N/A	#N/A	0.99443
SSX2IP	1103.76	0.889983	0.524205	1.69778	0.0895499	0.679169	1.85315	#N/A	#N/A	2.31e-09
CDH11	10396	-0.455097	0.267879	-1.69889	0.0893398	0.679169	0.729461	-0.678704	#N/A	0.9999
SSB	3409.8	-0.540511	0.318254	-1.69836	0.0894396	0.679169	0.687527	-0.383807	#N/A	0.089615
H2AFZ	11851.7	-0.356456	0.209882	-1.69836	0.0894395	0.679169	0.781081	-0.0139464	#N/A	0.87861
TBL1X	3297.65	-0.747057	0.439999	-1.69786	0.0895339	0.679169	0.595818	#N/A	#N/A	0.97946
ITGB1BP2	41.8003	5.05097	2.97405	1.69834	0.0894429	0.679169	33.1507	#N/A	#N/A	2.6e-08
DPF2	4642.7	0.610468	0.35976	1.69688	0.0897199	0.679397	1.52675	-2.42993	#N/A	0.99985
LARP4	912.766	1.02156	0.602001	1.69695	0.0897066	0.679397	2.03012	1.041	#N/A	0.86884
ZNF225	197.928	3.09294	1.82287	1.69674	0.0897452	0.679397	8.53235	#N/A	#N/A	0.11448
PLOD1	4973.21	0.536268	0.316288	1.6955	0.0899801	0.679549	1.45022	0.0349685	#N/A	1.48e-15
PI4KB	4392.49	-0.511755	0.302349	-1.6926	0.0905322	0.679549	0.701369	-0.833977	#N/A	0.86607
HIST3H2A	493.462	-1.41846	0.837006	-1.69469	0.0901351	0.679549	0.374111	-0.047588	#N/A	0.53421
WAPL	2394.01	0.655023	0.387329	1.69113	0.0908123	0.679549	1.57464	-2.14369	#N/A	#N/A
CYP2R1	94.9771	-3.18173	1.87912	-1.6932	0.0904174	0.679549	0.110205	#N/A	#N/A	3.79e-10
AP001324.1	91558.5	-0.36428	0.215266	-1.69223	0.0906015	0.679549	0.776857	#N/A	#N/A	#N/A
AC127070.1	43807.5	-0.419657	0.248124	-1.69132	0.0907763	0.679549	0.747602	#N/A	#N/A	#N/A
PSMA3-AS1	724.322	-1.23771	0.729871	-1.69579	0.0899254	0.679549	0.424045	#N/A	#N/A	#N/A
MLX	1049.53	-1.16541	0.687333	-1.69556	0.0899696	0.679549	0.445837	#N/A	#N/A	0.11032
ACTN4	20708.8	0.303122	0.17913	1.69219	0.0906098	0.679549	1.23381	0.0396242	#N/A	1
SOS1	1508.6	-0.836031	0.494195	-1.6917	0.0907027	0.679549	0.560183	1.13151	1	1
TMSB10	87578.7	0.368503	0.217885	1.69127	0.0907855	0.679549	1.29101	0.131729	#N/A	0.018038
TMEM177	54.5268	-3.83011	2.26409	-1.69167	0.0907083	0.679549	0.0703109	#N/A	#N/A	0.0089914
TRPM2	64.6878	-3.98861	2.35849	-1.69117	0.0908047	0.679549	0.0629954	#N/A	#N/A	8.96e-44
WDR48	3251.91	-0.629552	0.371979	-1.69244	0.0905618	0.679549	0.646377	0.848982	#N/A	0.99985
ADD1	6118.79	0.439414	0.259463	1.69355	0.0903508	0.679549	1.35605	0.304946	#N/A	0.9883
LYAR	429.239	-1.3071	0.772755	-1.69148	0.090745	0.679549	0.404132	0.298092	#N/A	3.76e-07
SMIM13	1639.53	0.796686	0.470806	1.69218	0.0906125	0.679549	1.73711	#N/A	#N/A	0.19183
DPP6	2153.2	-0.897399	0.530392	-1.69196	0.0906543	0.679549	0.536854	-4.35784	1	0.33997
N4BP2L2	1209.17	-0.811637	0.480125	-1.69047	0.0909379	0.679727	0.569735	#N/A	#N/A	1.33e-09
CNRIP1	2295.77	0.641365	0.379604	1.68956	0.0911116	0.679727	1.5598	-0.721455	#N/A	0.15874
PRKAR2A-AS1	66.0965	4.00812	2.3716	1.69005	0.0910192	0.679727	16.0903	#N/A	#N/A	#N/A
R3HCC1	4084.25	0.539145	0.319001	1.6901	0.0910083	0.679727	1.45311	#N/A	#N/A	0.00014338
XPA	841.406	-1.07227	0.634624	-1.68961	0.0911023	0.679727	0.475571	#N/A	1	7.8652e-05
SAR1A	6299.71	0.503371	0.298434	1.68671	0.0916599	0.683404	1.41752	-0.0587649	#N/A	0.37178
YWHAH	5180.06	0.521346	0.309182	1.68621	0.0917554	0.683528	1.43529	0.34569	#N/A	0.78366
SEC31A	8427.73	-0.638586	0.378748	-1.68604	0.0917875	0.683528	0.642342	-0.11454	#N/A	7.8773e-05
ZNF763	191.721	3.40802	2.02181	1.68563	0.0918677	0.683713	10.6149	#N/A	#N/A	0.020817
MRPL34	1038.93	-0.947813	0.562396	-1.68531	0.0919283	0.683752	0.518418	#N/A	#N/A	6.9136e-05
NOC2L	2664.39	0.629251	0.373585	1.68436	0.0921127	0.684633	1.54676	0.253881	#N/A	2.89e-29
KIF6	52.8581	-3.56184	2.11495	-1.68412	0.0921578	0.684633	0.0846798	#N/A	#N/A	3.09e-27
CUTA	3537.63	0.571816	0.33987	1.68245	0.0924807	0.686618	1.48639	-0.204322	#N/A	3.08e-07
MDN1	362.683	-1.52024	0.90393	-1.68181	0.0926052	0.687128	0.348628	-0.82813	#N/A	2.16e-08
SCUBE3	4836.24	0.549171	0.326814	1.68038	0.092884	0.688447	1.46324	0.8084	#N/A	0.99939
STXBP5	990.575	1.16062	0.690714	1.68032	0.0928946	0.688447	2.23554	#N/A	#N/A	0.99956
SWAP70	1580.7	-0.849479	0.505679	-1.67988	0.0929811	0.688674	0.554985	0.113367	#N/A	0.049628
SAMD11	2667.96	0.624349	0.372827	1.67464	0.0940058	0.689332	1.54152	#N/A	#N/A	4.77e-14
TAGLN2	12422.9	0.410052	0.244561	1.67668	0.0936041	0.689332	1.32873	0.498933	#N/A	0.0093548
SEMA7A	298.911	2.05851	1.22814	1.67612	0.0937156	0.689332	4.16555	#N/A	#N/A	0.17976
TNFRSF12A	4401.83	0.651853	0.38868	1.6771	0.0935238	0.689332	1.57119	2.39481	#N/A	0.017995
ZNF276	266.458	-2.65068	1.57898	-1.67873	0.0932041	0.689332	0.159245	#N/A	#N/A	7.9e-06
NAPG	916.775	1.55494	0.927365	1.67673	0.0935962	0.689332	2.93821	1.83565	#N/A	0.081162
ZNF844	790.762	-1.09968	0.654916	-1.67912	0.0931287	0.689332	0.466619	#N/A	#N/A	0.0020558
CAPNS1	9059.37	0.478129	0.28556	1.67435	0.0940613	0.689332	1.39294	-0.195355	#N/A	7.11e-07
MEIS1	593.895	-1.19669	0.71475	-1.67428	0.094076	0.689332	0.436275	#N/A	#N/A	0.99951
ATP6V1E1	6055.91	0.437826	0.261455	1.67458	0.0940174	0.689332	1.35456	0.975693	#N/A	0.528
AGTR1	96.3151	3.30785	1.97363	1.67602	0.0937341	0.689332	9.90286	#N/A	#N/A	0.00053161
CXCL8	56.954	4.4855	2.67714	1.67548	0.0938395	0.689332	22.4012	#N/A	#N/A	#N/A
NFKB1	2212.38	-0.82756	0.493227	-1.67785	0.093377	0.689332	0.563481	-2.9989	#N/A	1
RPA3	963.163	1.03861	0.618808	1.6784	0.0932681	0.689332	2.05425	0.699698	#N/A	8.55e-09
SFRP1	983.295	-1.33987	0.798716	-1.67753	0.0934382	0.689332	0.395055	0.876711	#N/A	0.96457
TRPM3	238.582	-1.79972	1.07338	-1.67668	0.0936042	0.689332	0.28723	#N/A	#N/A	5.69e-07
BEX2	1006.94	1.11248	0.664285	1.67471	0.0939913	0.689332	2.16218	#N/A	#N/A	0.10078
FHL1	5763.8	0.55472	0.331069	1.67554	0.093828	0.689332	1.46888	0.0628788	#N/A	0.96979
GALK2	362.927	2.78975	1.66653	1.67398	0.0941339	0.689346	6.9151	#N/A	#N/A	7.9e-14
EIF4A2	10662.2	-0.375913	0.224632	-1.67346	0.0942365	0.689688	0.770617	-0.290641	#N/A	0.99835
HP1BP3	8795.21	-0.410139	0.245292	-1.67204	0.0945158	0.689965	0.752551	-0.0440181	#N/A	0.98422
AQP11	175.657	2.70112	1.61565	1.67185	0.094554	0.689965	6.50309	#N/A	#N/A	0.00053022
C12orf75	2567.84	0.709757	0.424358	1.67254	0.0944174	0.689965	1.63553	#N/A	#N/A	0.63977
SCARB1	872.057	-1.02874	0.615234	-1.67211	0.0945017	0.689965	0.490137	#N/A	#N/A	0.066228
BTF3	12840.2	-0.405856	0.242696	-1.67228	0.0944682	0.689965	0.754788	0.00816273	#N/A	0.75624
C1orf52	956.49	0.881864	0.527591	1.67149	0.0946241	0.690068	1.84276	#N/A	#N/A	0.047382
HNRNPA1P48	7547.84	-0.464448	0.277945	-1.67101	0.0947201	0.69036	0.724748	#N/A	#N/A	#N/A
PSMA7	8099.54	-0.579068	0.34665	-1.67047	0.0948264	0.690726	0.669396	-0.253184	#N/A	0.98768
FADS3	492.779	1.22171	0.731514	1.67011	0.0948967	0.69083	2.33223	#N/A	#N/A	0.0025334
USP37	743.111	-1.42687	0.854985	-1.66888	0.0951409	0.692199	0.371937	#N/A	#N/A	0.99999
RTCB	3865.05	0.573159	0.343635	1.66793	0.0953298	0.693165	1.48778	0.334047	#N/A	0.0052059
BVES	8.8231	6.52085	3.91115	1.66725	0.0954656	0.693386	91.8269	#N/A	#N/A	9.343e-06
COL1A2	174831	-0.340795	0.204411	-1.66721	0.0954727	0.693386	0.789606	0.572599	#N/A	1
PCDHB14	328.164	-1.72134	1.03301	-1.66633	0.0956471	0.694244	0.303267	#N/A	#N/A	4.55e-14
GAS1	25753.8	-0.377591	0.226772	-1.66507	0.0958981	0.695656	0.769722	2.58809	#N/A	0.81915
SLC9A1	807.767	1.09379	0.657046	1.6647	0.095972	0.695783	2.13433	#N/A	#N/A	0.79049
HSD11B1L	399.027	-1.97395	1.18653	-1.66363	0.0961863	0.695846	0.254555	#N/A	#N/A	0.00027093
ARL5A	4764.52	-0.532177	0.319963	-1.66325	0.0962629	0.695846	0.69151	#N/A	#N/A	0.1281
DIS3L2	222.829	2.43334	1.46234	1.66401	0.096111	0.695846	5.40143	-0.613817	#N/A	0.944
SHISA3	2331.71	-0.642936	0.386357	-1.6641	0.096093	0.695846	0.640408	#N/A	#N/A	3.6402e-05
ERAP1	1337.14	-0.844656	0.507777	-1.66344	0.0962246	0.695846	0.556844	-0.166715	#N/A	2.06e-26
MED4	3354.52	-0.601442	0.361767	-1.66251	0.0964104	0.696097	0.659095	#N/A	#N/A	0.0076107
PSMC3IP	499.546	-1.36257	0.819469	-1.66274	0.0963641	0.696097	0.38889	#N/A	#N/A	3.7819e-05
VPS13D	1144.35	-0.864986	0.520841	-1.66075	0.096764	0.696334	0.549052	#N/A	#N/A	1.07e-06
CREB3L4	296.755	-1.99696	1.20355	-1.65922	0.0970708	0.696334	0.250527	#N/A	#N/A	5.14e-06
CAMSAP2	2633.03	0.684951	0.412114	1.66204	0.0965042	0.696334	1.60765	0.648718	#N/A	0.99999
TMEM9	8681.96	-0.453555	0.273441	-1.65869	0.0971773	0.696334	0.730241	3.40504	#N/A	0.0036291
CDK1	885.456	-1.20831	0.727892	-1.66001	0.0969125	0.696334	0.432776	-0.808573	#N/A	0.99206
ACTR1A	3733.26	0.516814	0.311185	1.66079	0.0967547	0.696334	1.43079	0.00011505	#N/A	0.96621
FKBP7	2801.91	-0.669023	0.402882	-1.66059	0.0967951	0.696334	0.628932	0.157019	#N/A	4.18e-08
PPARA	79.4533	3.00531	1.8112	1.65929	0.0970567	0.696334	8.02951	#N/A	#N/A	0.030182
SDHA	1439.01	0.8515	0.513256	1.65901	0.0971129	0.696334	1.80438	0.377116	1	2.61e-10
ADAM19	3372.33	0.767236	0.462173	1.66006	0.0969024	0.696334	1.70201	#N/A	#N/A	6.8e-05
CREBRF	423.65	-1.56649	0.942903	-1.66134	0.0966444	0.696334	0.33763	#N/A	#N/A	0.99997
TEAD3	865.261	1.28349	0.773692	1.65892	0.0971316	0.696334	2.43428	2.13041	#N/A	0.99362
FBXO25	349.07	-1.98411	1.19609	-1.65883	0.0971499	0.696334	0.252768	#N/A	#N/A	0.00019921
SHCBP1	50.7173	4.48616	2.70804	1.6566	0.0975994	0.698547	22.4113	#N/A	#N/A	9.38e-08
PRELID1P1	99.2834	-2.82382	1.70453	-1.65666	0.0975884	0.698547	0.141236	#N/A	#N/A	#N/A
OAT	5037.54	0.457093	0.275992	1.65618	0.0976857	0.698759	1.37277	0.351685	#N/A	7.72e-07
SLC37A4	395.479	1.73427	1.04805	1.65476	0.0979736	0.700412	3.32712	#N/A	#N/A	1.6748e-05
SFT2D2	1652.35	-0.790123	0.477719	-1.65395	0.0981377	0.701178	0.578295	#N/A	#N/A	0.011062
MZT2A	5124.86	0.511742	0.309558	1.65314	0.0983031	0.701954	1.42577	-0.525386	#N/A	8.001e-06
DENND5B	636.363	1.13818	0.690189	1.64908	0.0991314	0.702329	2.20103	#N/A	#N/A	1
EMC9	2532.8	-0.655437	0.397245	-1.64996	0.0989516	0.702329	0.634883	#N/A	#N/A	0.0013199
SOCS4	781.296	1.23519	0.747979	1.65137	0.0986637	0.702329	2.35412	#N/A	#N/A	1.4208e-05
NQO1	3709.28	0.625997	0.379692	1.6487	0.09921	0.702329	1.54328	#N/A	#N/A	1.19e-09
LOC101928000	326.229	-2.67538	1.62194	-1.64949	0.0990463	0.702329	0.156542	#N/A	#N/A	#N/A
RBFOX3	138.108	3.05233	1.84754	1.6521	0.0985132	0.702329	8.29549	#N/A	#N/A	0.99785
MAIP1	473.909	1.33377	0.808832	1.649	0.099147	0.702329	2.5206	-0.729954	#N/A	#N/A
EPHA3	2017.96	-0.836621	0.506857	-1.65061	0.0988191	0.702329	0.559954	#N/A	#N/A	1.1953e-05
HACD2	1548.45	0.918283	0.555958	1.65171	0.0985931	0.702329	1.88986	2.68455	#N/A	#N/A
PDS5A	1542.93	0.806396	0.488645	1.65027	0.098888	0.702329	1.74884	1.54379	#N/A	1
RAD50	553.653	-1.27837	0.77518	-1.64913	0.0991207	0.702329	0.41226	0.541314	#N/A	3.44e-27
MAD1L1	754.305	1.09972	0.6666	1.64974	0.0989958	0.702329	2.14313	-0.761539	#N/A	6.84e-16
TAC1	782.231	1.62268	0.983349	1.65016	0.0989103	0.702329	3.07947	#N/A	#N/A	0.74608
FBXO10	336.4	-2.26846	1.37506	-1.64972	0.0990009	0.702329	0.207552	#N/A	#N/A	2.38e-06
TCEAL4	4581.78	-0.502718	0.304876	-1.64892	0.0991631	0.702329	0.705776	-0.286908	#N/A	0.74827
PPP1R14C	1263.47	0.936595	0.568403	1.64777	0.0994008	0.703276	1.91401	1.1439	#N/A	0.002032
EXO5	577.351	1.93327	1.17408	1.64663	0.0996346	0.703719	3.81921	#N/A	#N/A	2.2661e-05
GSE1	3189.59	-0.648569	0.393797	-1.64696	0.0995661	0.703719	0.637913	#N/A	1	1
PNMAL1	817.108	1.17858	0.715655	1.64686	0.0995876	0.703719	2.26354	#N/A	#N/A	0.0033297
TSPAN2	735.54	1.19652	0.727857	1.6439	0.100197	0.704127	2.29187	#N/A	#N/A	2.3496e-05
PTEN	54718.9	-0.368352	0.224041	-1.64412	0.100151	0.704127	0.774667	-0.282474	1	0.25651
CRTC1	660.227	-1.2525	0.762569	-1.64247	0.100492	0.704127	0.41972	#N/A	#N/A	0.531
WDR54	457.24	-1.38146	0.839708	-1.64517	0.0999351	0.704127	0.38383	#N/A	#N/A	1.57e-11
DGCR14	703.001	1.06295	0.646077	1.64524	0.0999211	0.704127	2.0892	#N/A	#N/A	2.44e-07
IQSEC1	1330.49	-0.744569	0.452926	-1.64391	0.100195	0.704127	0.596846	-1.07359	#N/A	0.99969
FBXL2	586.381	1.53319	0.933372	1.64263	0.100459	0.704127	2.89425	#N/A	#N/A	0.0075282
C3orf62	182.631	2.49147	1.51674	1.64265	0.100454	0.704127	5.62352	#N/A	#N/A	0.00012633
TUSC2	1451.97	-0.858929	0.522702	-1.64325	0.100332	0.704127	0.551362	#N/A	#N/A	0.7671
UBA3	1417.24	0.916186	0.55758	1.64315	0.100353	0.704127	1.88712	-0.0464571	#N/A	0.50413
ATP13A3	1018.51	0.977475	0.59387	1.64594	0.0997756	0.704127	1.96902	#N/A	#N/A	0.99998
GS1-124K5.4	109.008	3.50376	2.13078	1.64436	0.100102	0.704127	11.3433	#N/A	#N/A	#N/A
ZNF277	624.294	1.1118	0.676677	1.64303	0.100376	0.704127	2.16116	#N/A	#N/A	8.32e-22
NDUFA5	2134.21	0.835935	0.508284	1.64462	0.100048	0.704127	1.78501	0.388891	#N/A	0.0018728
GSTM3	3757.51	-0.574492	0.350027	-1.64128	0.100739	0.704498	0.671523	-1.0576	#N/A	4.36e-07
CCND1	768.533	1.42151	0.866657	1.64023	0.100958	0.704498	2.67867	#N/A	#N/A	0.89057
RASSF8	1805.16	0.684531	0.417492	1.63963	0.101083	0.704498	1.60718	#N/A	#N/A	0.94158
BAZ1A	412.529	-1.76481	1.07534	-1.64116	0.100765	0.704498	0.294266	#N/A	#N/A	1
ZNF433	80.9979	-3.41317	2.0809	-1.64024	0.100955	0.704498	0.0938712	#N/A	#N/A	0.012227
PDE1A	1211.56	0.982589	0.599317	1.63951	0.101106	0.704498	1.97601	#N/A	#N/A	0.013549
DPM1	3230.89	-0.603233	0.367944	-1.63947	0.101116	0.704498	0.658277	-0.152207	1	0.00016237
DENND6B	146.721	2.58111	1.57324	1.64063	0.100875	0.704498	5.98399	#N/A	#N/A	3.79e-09
PCDHB15	130.613	3.33447	2.03355	1.63973	0.101061	0.704498	10.0873	#N/A	#N/A	9.74e-12
TMOD1	910.145	-1.03172	0.628402	-1.64182	0.100627	0.704498	0.489125	#N/A	#N/A	0.47845
SLC2A13	258.973	2.43881	1.48803	1.63895	0.101223	0.704521	5.42195	#N/A	#N/A	0.83307
IK	5464.32	-0.457637	0.279234	-1.6389	0.101233	0.704521	0.728178	0.0884077	#N/A	2.49e-06
ZNF438	233.957	-3.02789	1.84807	-1.6384	0.101337	0.704846	0.122607	#N/A	#N/A	2.67e-06
FTL	40362.7	0.353096	0.215602	1.63772	0.101479	0.705037	1.2773	-0.748841	#N/A	1.66e-09
TSTD2	910.951	-1.02941	0.62846	-1.63798	0.101425	0.705037	0.489911	#N/A	#N/A	1.9e-11
AC113383.1	8.14508	6.4024	3.91152	1.63681	0.101671	0.705973	84.5893	#N/A	#N/A	#N/A
FBL	12086	-0.361791	0.221202	-1.63557	0.10193	0.706577	0.778198	0.24566	#N/A	0.99319
PTTG1IP	6037.95	0.421837	0.257886	1.63575	0.101892	0.706577	1.33963	#N/A	#N/A	0.0049827
CCNG2	11052.1	-0.415782	0.254155	-1.63594	0.101852	0.706577	0.749613	#N/A	#N/A	0.0096861
SYT4	4264.35	0.523342	0.320102	1.63493	0.102065	0.707114	1.43728	#N/A	#N/A	0.43924
BEND7	329.255	-1.87467	1.14693	-1.63451	0.102152	0.707206	0.272689	#N/A	#N/A	0.0060711
ENSG00000234531	1460.16	0.798958	0.488959	1.634	0.102259	0.707206	1.73984	#N/A	#N/A	#N/A
SUGT1	1329.55	1.08773	0.666709	1.63149	0.102787	0.707206	2.12539	0.0779605	#N/A	0.45272
GINS3	104.125	2.8215	1.72886	1.63199	0.102681	0.707206	7.06896	#N/A	#N/A	1.505e-05
HAP1	338.74	-1.94652	1.19362	-1.63077	0.102938	0.707206	0.259441	#N/A	#N/A	3.35e-26
GFAP	7834.48	0.58175	0.356262	1.63293	0.102484	0.707206	1.49666	0.520781	1	1.46e-06
MFF	3100.18	-0.530814	0.324989	-1.63333	0.1024	0.707206	0.692164	1.12312	#N/A	0.065397
PITPNB	1243.88	-0.843246	0.516474	-1.6327	0.102532	0.707206	0.557388	-0.0160374	#N/A	0.981
LCORL	1357.22	-1.03087	0.63155	-1.63228	0.10262	0.707206	0.489415	#N/A	#N/A	0.92374
EMB	244.342	2.35391	1.44274	1.63155	0.102774	0.707206	5.11208	#N/A	#N/A	1.01e-11
ORC3	431.881	1.77306	1.08719	1.63087	0.102919	0.707206	3.41777	#N/A	#N/A	1.62e-09
UTP23	688.074	-1.13456	0.69549	-1.63132	0.102824	0.707206	0.455473	#N/A	#N/A	0.086364
SHARPIN	1213.26	0.836161	0.512723	1.63083	0.102927	0.707206	1.78529	#N/A	#N/A	2.312e-05
GBA2	1396.37	0.82023	0.502019	1.63386	0.102288	0.707206	1.76569	#N/A	#N/A	1.99e-20
IRAK1	137.871	2.5229	1.54654	1.63131	0.102824	0.707206	5.74736	#N/A	#N/A	0.98774
CDKN2B	521.937	1.40228	0.860057	1.63045	0.103006	0.707278	2.64319	#N/A	#N/A	0.0073369
BBS2	1121.81	-0.94971	0.582822	-1.6295	0.103207	0.707867	0.517737	#N/A	1	1.03e-17
NPTXR	1366.05	0.80012	0.490952	1.62973	0.103158	0.707867	1.74125	#N/A	#N/A	0.71597
NRAS	3321.95	0.542358	0.33341	1.6267	0.103801	0.708594	1.45635	0.117718	1	0.49009
M6PR	1507.39	0.851492	0.523037	1.62798	0.10353	0.708594	1.80437	1.05882	#N/A	0.0092215
CHD8	2839.12	0.594757	0.36595	1.62524	0.104111	0.708594	1.51022	#N/A	1	1
ZNF526	687.341	-1.76363	1.08472	-1.62589	0.103973	0.708594	0.294506	#N/A	#N/A	0.52316
ZNF580	1332.36	0.823249	0.505821	1.62755	0.103621	0.708594	1.76939	#N/A	#N/A	0.53362
FARP2	591.121	1.83982	1.13224	1.62494	0.104175	0.708594	3.57966	#N/A	#N/A	4.64e-36
SERINC3	6206.08	0.514999	0.316338	1.628	0.103525	0.708594	1.42899	#N/A	#N/A	0.7788
RBM38	1009.22	-0.859163	0.527936	-1.6274	0.103653	0.708594	0.551272	#N/A	#N/A	0.71583
TMEM158	8198.53	0.450982	0.277425	1.6256	0.104035	0.708594	1.36697	#N/A	#N/A	0.14862
PGM2	557.981	1.16358	0.714646	1.62819	0.103484	0.708594	2.24013	-0.125146	#N/A	5.04e-12
FGF2	870.999	1.25773	0.773942	1.62509	0.104143	0.708594	2.39119	0.397246	#N/A	0.0184
BTN2A1	330.242	2.32176	1.42705	1.62697	0.103743	0.708594	4.99942	#N/A	#N/A	3.4e-21
STMN2	13760.8	0.459757	0.282858	1.6254	0.104077	0.708594	1.37531	0.700217	#N/A	0.97687
ZNF7	353.677	-1.84756	1.13558	-1.62697	0.103743	0.708594	0.277863	#N/A	#N/A	2.1e-07
SLITRK4	206.793	2.51473	1.54725	1.62529	0.104101	0.708594	5.71489	#N/A	#N/A	0.79447
ABHD4	893.04	-1.05456	0.649203	-1.6244	0.104292	0.708998	0.481443	#N/A	#N/A	2.22e-08
NOM1	522.162	-1.39211	0.857424	-1.6236	0.104462	0.709764	0.381007	#N/A	#N/A	4.19e-10
RLIM	2019.32	-0.680788	0.419785	-1.62175	0.104856	0.71205	0.623824	#N/A	#N/A	0.99301
TELO2	1327.66	-1.12692	0.695372	-1.6206	0.105104	0.713345	0.457893	1.81266	#N/A	7.2e-14
MUM1L1	302.345	1.67204	1.03251	1.6194	0.105362	0.714698	3.18665	#N/A	#N/A	0.48293
MANEAL	1203.74	0.975575	0.602969	1.61795	0.105673	0.715802	1.96642	#N/A	#N/A	0.004939
KDELC2	1680.14	-1.01497	0.627364	-1.61783	0.105699	0.715802	0.494839	-0.768431	#N/A	1.14e-10
CYP4V2	229.553	2.88623	1.78375	1.61807	0.105647	0.715802	7.39336	#N/A	#N/A	2.2e-10
NUTM2A-AS1	51.0853	3.43614	2.12667	1.61574	0.106151	0.716898	10.8238	#N/A	#N/A	#N/A
NARFL	303.942	-2.08555	1.29029	-1.61634	0.10602	0.716898	0.235607	#N/A	#N/A	1.89e-09
ZNF71	961.903	-1.11159	0.687581	-1.61667	0.105949	0.716898	0.462783	#N/A	#N/A	1.84e-08
MRPL40	1576.69	0.80708	0.499511	1.61574	0.10615	0.716898	1.74967	#N/A	#N/A	0.052924
2020-09-06	1158.27	-0.984557	0.609304	-1.61587	0.106122	0.716898	0.505381	0.97049	#N/A	0.93177
AKR7A2	2131.1	-0.74586	0.461731	-1.61536	0.106234	0.71701	0.596312	0.330918	#N/A	1.99e-10
MSN	16991.4	0.318246	0.197041	1.61512	0.106284	0.71701	1.24681	0.10398	#N/A	0.99967
ISCU	2531.28	0.559512	0.346483	1.61483	0.106347	0.717041	1.47377	0.127375	#N/A	0.041463
KCNK12	570.236	2.03109	1.25824	1.61424	0.106476	0.717523	4.08715	#N/A	#N/A	0.91853
MAMDC2	12649.3	-0.414286	0.256717	-1.61379	0.106574	0.717786	0.750391	0.39241	#N/A	3.1e-10
CTTNBP2NL	630.872	-1.19856	0.742874	-1.61341	0.106655	0.717942	0.43571	0.153851	#N/A	0.0027461
NIPSNAP2	1001.91	-1.10122	0.68276	-1.61289	0.106768	0.718313	0.466123	0.0727858	#N/A	#N/A
ZNF710-AS1	262.663	-2.29967	1.42668	-1.6119	0.106983	0.719367	0.20311	#N/A	#N/A	#N/A
PLD1	309.382	-2.48455	1.54224	-1.611	0.107179	0.720288	0.17868	#N/A	#N/A	4.78e-21
ARID5B	1191.55	-0.926558	0.575244	-1.61072	0.10724	0.720308	0.526112	#N/A	#N/A	1
ZNF436	875.577	-0.956566	0.594292	-1.60959	0.107487	0.720809	0.515282	#N/A	#N/A	5.1273e-05
SMAD3	1685.4	-0.950397	0.590936	-1.60829	0.107771	0.720809	0.51749	#N/A	#N/A	0.79796
ENSG00000230903	34714.5	-0.386402	0.24024	-1.6084	0.107747	0.720809	0.765035	#N/A	#N/A	#N/A
R3HDM4	4119.14	0.529171	0.329037	1.60824	0.107782	0.720809	1.4431	#N/A	#N/A	0.00046251
ZNF416	359.944	-1.92437	1.19603	-1.60897	0.107624	0.720809	0.263455	#N/A	#N/A	0.36706
GLS	10933.6	-0.358027	0.222542	-1.60881	0.107658	0.720809	0.780231	0.798791	#N/A	0.96154
HIPK2	4273.48	0.634327	0.394216	1.60908	0.107598	0.720809	1.55221	#N/A	#N/A	1
AZIN1	4015.21	0.466385	0.289852	1.60904	0.107607	0.720809	1.38164	#N/A	#N/A	0.99485
TMEM151A	244.951	1.78241	1.10926	1.60684	0.108089	0.721684	3.44001	#N/A	#N/A	0.0029247
IFT46	1253.13	0.934039	0.581105	1.60735	0.107977	0.721684	1.91062	#N/A	#N/A	0.16822
ZNF358	4179.07	0.484318	0.301375	1.60703	0.108047	0.721684	1.39892	#N/A	#N/A	0.78754
DERA	480.505	1.4897	0.927493	1.60615	0.108241	0.722047	2.8083	-1.12392	#N/A	0.00037318
FAM184A	338.778	1.61272	1.00414	1.60606	0.10826	0.722047	3.05828	#N/A	#N/A	1.06e-21
HSPE1-MOB4	106.23	3.37071	2.09967	1.60535	0.108416	0.722405	10.3439	#N/A	#N/A	0.9709
ABLIM3	1628.15	-0.945461	0.588968	-1.60529	0.108431	0.722405	0.519264	#N/A	#N/A	1.06e-07
GK	67.416	3.82354	2.38284	1.60461	0.108579	0.722999	14.1579	0.178172	1	0.98937
BLZF1	590.093	1.17994	0.73582	1.60357	0.10881	0.723453	2.26567	#N/A	#N/A	5.09e-07
PHLDA3	3380.41	0.574513	0.358539	1.60238	0.109073	0.723453	1.48918	#N/A	#N/A	0.25036
PLEKHG3	271.39	2.14855	1.34102	1.60218	0.109116	0.723453	4.43382	#N/A	#N/A	4.68e-08
RIOK3	2442.63	-0.704533	0.439334	-1.60364	0.108793	0.723453	0.613641	#N/A	#N/A	4.77e-07
RALGAPB	1108.99	0.916166	0.571776	1.60232	0.109086	0.723453	1.88709	2.72461	#N/A	1
PIM1	1995.15	0.722744	0.450923	1.60281	0.108977	0.723453	1.65032	#N/A	#N/A	0.84846
ZBTB10	762.918	-1.38638	0.86502	-1.60271	0.108998	0.723453	0.382524	#N/A	#N/A	0.99067
TRAF2	168.876	-2.405	1.5	-1.60333	0.108861	0.723453	0.188809	0.631307	#N/A	0.99979
CPEB3	156.84	3.13524	1.95777	1.60143	0.109281	0.723963	8.78618	-2.04152	#N/A	0.99846
ACIN1	3057.18	-0.748749	0.467589	-1.6013	0.109311	0.723963	0.595119	-0.0341462	#N/A	1
FAM20C	2941.42	0.673699	0.420925	1.60052	0.109483	0.724328	1.59516	#N/A	#N/A	0.31465
ATP6AP1	5931.51	0.483989	0.30235	1.60076	0.109431	0.724328	1.39861	0.0464333	#N/A	0.99079
B3GALT6	936.594	1.03897	0.650064	1.59826	0.109985	0.724452	2.05476	#N/A	#N/A	0.022667
DHX9	5354.86	-0.49476	0.309991	-1.59604	0.110479	0.724452	0.70968	0.181236	#N/A	1
DYNC1I2P1	3464.09	0.608228	0.380511	1.59845	0.109942	0.724452	1.52439	#N/A	#N/A	#N/A
PBLD	224.181	2.26814	1.41766	1.59992	0.109615	0.724452	4.81703	0.746303	#N/A	2.34e-11
MRPL11	1732.55	-0.710227	0.444446	-1.598	0.110042	0.724452	0.611224	0.591422	#N/A	1.54e-06
DUSP6	365.054	1.93006	1.20761	1.59824	0.109989	0.724452	3.81071	#N/A	#N/A	0.97603
NAGLU	927.609	1.2495	0.78121	1.59944	0.109723	0.724452	2.37758	0.3261	1	1.37e-08
ATP5A1	11290.6	-0.362662	0.226704	-1.59972	0.109661	0.724452	0.777728	#N/A	#N/A	0.99945
AES	10863.5	-0.450441	0.28205	-1.59703	0.11026	0.724452	0.731819	#N/A	#N/A	0.93594
ELOF1	1179.61	-0.88823	0.555583	-1.59873	0.10988	0.724452	0.540277	#N/A	#N/A	0.090121
EVA1A	387.436	1.73232	1.08419	1.5978	0.110087	0.724452	3.32261	#N/A	#N/A	0.065594
COX5B	14527.2	-0.327067	0.204821	-1.59684	0.110301	0.724452	0.797155	0.0258365	#N/A	0.87383
ZNF337	199.671	2.30204	1.44196	1.59647	0.110385	0.724452	4.93153	#N/A	#N/A	0.0036778
CLASP2	1402.78	0.87753	0.549506	1.59694	0.110278	0.724452	1.83723	1.24876	#N/A	1
SMARCA5	3968.24	0.51929	0.325385	1.59593	0.110505	0.724452	1.43325	0.355027	#N/A	1
ZNF704	1921.21	-0.723275	0.452812	-1.5973	0.110199	0.724452	0.605721	#N/A	#N/A	0.99532
LINC00094	4229.4	-0.61724	0.386675	-1.59628	0.110427	0.724452	0.651917	#N/A	#N/A	#N/A
TMEM47	6394.1	-0.524448	0.328721	-1.59542	0.110618	0.724452	0.695225	3.2504	#N/A	0.79685
FAM120C	222.37	1.7406	1.09099	1.59543	0.110616	0.724452	3.34174	#N/A	#N/A	0.99998
AC007969.1	37179.7	-0.370661	0.232465	-1.59448	0.110829	0.724782	0.773428	#N/A	#N/A	#N/A
HBS1L	580.433	1.10113	0.690539	1.5946	0.110802	0.724782	2.14523	1.1244	#N/A	1.86e-07
NPR2	358.72	-1.46253	0.917288	-1.59441	0.110845	0.724782	0.362856	#N/A	#N/A	4.2042e-05
CDC42BPA	460.41	-1.36193	0.854564	-1.59372	0.110999	0.725406	0.38906	1.24774	#N/A	0.99309
SORBS3	1514.93	0.896557	0.562865	1.59284	0.111195	0.726303	1.86162	-0.302074	#N/A	8.23e-12
CISD2	1117.93	1.54353	0.969276	1.59246	0.111282	0.726487	2.91507	0.630828	#N/A	0.41583
CPT2	1570.22	-0.851716	0.53497	-1.59208	0.111366	0.726563	0.554125	0.285918	#N/A	4.6e-10
MRPL4	3882.67	0.653423	0.41054	1.59162	0.111471	0.726563	1.5729	1.59029	#N/A	4.27e-10
C2orf68	1149.4	-1.02871	0.646321	-1.59165	0.111464	0.726563	0.490147	#N/A	#N/A	5.76e-06
RABGGTB	1599.5	-0.671928	0.422297	-1.59113	0.111581	0.726855	0.627667	-0.100258	#N/A	0.007867
CEP19	245.773	2.30658	1.44986	1.59089	0.111633	0.726855	4.94707	#N/A	#N/A	0.015687
TTC39C	476.731	-1.24307	0.781632	-1.59036	0.111755	0.72726	0.422472	#N/A	#N/A	0.00043602
RNF213	925.419	-1.16426	0.732361	-1.58974	0.111893	0.727779	0.446192	-0.384558	#N/A	4.91e-55
METTL1	424.928	-1.83348	1.1543	-1.5884	0.112196	0.72898	0.280587	#N/A	#N/A	0.001962
GEMIN6	464.159	-1.50566	0.947818	-1.58855	0.112162	0.72898	0.35217	#N/A	#N/A	0.00010596
IST1	2761.8	-0.562683	0.354353	-1.58792	0.112305	0.729305	0.677042	-0.0566249	#N/A	0.0046461
PROB1	27.3252	5.28251	3.32792	1.58733	0.112438	0.729784	38.9218	#N/A	#N/A	0.0054944
ARTN	28.3853	5.26569	3.31853	1.58675	0.112568	0.730243	38.4708	#N/A	#N/A	0.35793
GUF1	277.341	2.31356	1.4584	1.58637	0.112655	0.730422	4.97109	-0.634398	#N/A	5.35e-18
ARHGEF2	1369.42	-0.778991	0.491148	-1.58606	0.112725	0.730493	0.582774	-0.65579	#N/A	1
TAF12	1887.48	-0.669191	0.422397	-1.58427	0.113132	0.730533	0.628859	#N/A	#N/A	0.95008
VEZT	2674.39	0.579576	0.365804	1.58439	0.113105	0.730533	1.49441	#N/A	#N/A	0.11018
PSPC1	608.909	-1.16863	0.737104	-1.58543	0.112868	0.730533	0.444844	0.00135388	#N/A	0.99013
KRT17	497.525	2.00024	1.26234	1.58455	0.113069	0.730533	4.00067	#N/A	#N/A	1.1e-11
MN1	1817.42	0.76783	0.484292	1.58547	0.11286	0.730533	1.70271	#N/A	#N/A	0.99999
PRSS35	1399.24	-0.866896	0.546891	-1.58514	0.112935	0.730533	0.548325	#N/A	#N/A	3.28e-10
RARRES2	1084.82	-0.836404	0.527963	-1.58421	0.113146	0.730533	0.560038	#N/A	#N/A	2.716e-05
NUF2	296.816	-2.03058	1.28199	-1.58393	0.113209	0.730558	0.244757	#N/A	#N/A	3.8169e-05
MRPS15	108.384	2.83242	1.78994	1.58241	0.113556	0.731526	7.12269	0.164249	#N/A	5e-10
SIK3	2053.74	0.7311	0.462154	1.58194	0.113663	0.731526	1.6599	#N/A	#N/A	1
JMJD8	2671.57	0.580733	0.367128	1.58183	0.113689	0.731526	1.49561	#N/A	#N/A	6.06e-14
ITGB1BP1	1889.28	0.841448	0.53194	1.58185	0.113684	0.731526	1.79185	#N/A	#N/A	9.6972e-05
AL391422.3	912.307	0.911067	0.575693	1.58256	0.113523	0.731526	1.88044	#N/A	#N/A	#N/A
CTGF	20325.4	0.485175	0.306741	1.58171	0.113715	0.731526	1.39976	#N/A	#N/A	0.00050202
CCDC184	1021.43	0.901335	0.570546	1.57978	0.114158	0.732338	1.86779	#N/A	#N/A	#N/A
FAM96A	881.385	0.868666	0.549926	1.5796	0.114198	0.732338	1.82597	#N/A	#N/A	1.9655e-05
ATP1B2	663.195	-1.75418	1.11036	-1.57983	0.114147	0.732338	0.296441	1.10241	#N/A	0.073684
ORMDL1	1478.34	-0.70574	0.446637	-1.58012	0.114079	0.732338	0.613128	0.323786	#N/A	0.12321
MAGI1	1365.03	-0.879939	0.556928	-1.57999	0.11411	0.732338	0.54339	#N/A	#N/A	0.5597
RNF128	3614.29	-0.555412	0.351478	-1.58022	0.114057	0.732338	0.680463	#N/A	#N/A	0.22826
PCYT1A	2242.72	0.689691	0.4367	1.57932	0.114262	0.73237	1.61294	0.39437	#N/A	2.024e-05
NDST1	2571.97	0.67521	0.427788	1.57838	0.114479	0.73338	1.59683	#N/A	1	0.99995
MBNL2	1990.32	-0.707201	0.448197	-1.57788	0.114593	0.733611	0.612507	1.02312	#N/A	0.25602
FAHD1	299.641	-1.92317	1.21937	-1.57718	0.114753	0.733611	0.263674	0.193958	#N/A	1.95e-12
CNDP2	1448.31	-0.736394	0.466835	-1.57742	0.114699	0.733611	0.600238	-0.199402	#N/A	1.01e-07
TNNC1	876.421	-1.62239	1.02839	-1.5776	0.114657	0.733611	0.324797	-6.56276	#N/A	0.67833
DNPEP	1435.65	0.936643	0.594085	1.57662	0.114884	0.733687	1.91407	-0.111813	#N/A	3.16e-08
SRPRB	2583.2	0.649712	0.412061	1.57674	0.114856	0.733687	1.56886	0.498293	#N/A	0.0058306
ZDHHC3	1825.31	0.790665	0.501583	1.57634	0.114947	0.733712	1.72987	#N/A	#N/A	0.027681
ITGB6	384.362	-1.97849	1.25571	-1.57559	0.11512	0.733794	0.253756	#N/A	#N/A	1.63e-22
SH3BP5	2610.77	0.734423	0.466121	1.57561	0.115116	0.733794	1.66373	#N/A	#N/A	0.04833
DVL3	2025.18	0.68986	0.437864	1.57551	0.115139	0.733794	1.61313	0.579542	#N/A	0.38544
NRDC	1420.01	0.849688	0.539596	1.57467	0.115332	0.734283	1.80211	0.0190017	#N/A	#N/A
KCNC4	283.608	2.15966	1.37205	1.57404	0.115479	0.734283	4.46811	#N/A	#N/A	0.0044543
SRP9P1	4726.7	-0.559865	0.355641	-1.57424	0.115432	0.734283	0.678366	#N/A	#N/A	#N/A
DRD4	43.1102	-3.99241	2.53832	-1.57286	0.115751	0.734283	0.0628295	#N/A	#N/A	9.34e-09
BTBD10	1537.22	0.731056	0.464762	1.57297	0.115726	0.734283	1.65985	#N/A	#N/A	0.0029452
SPIRE1	979.22	-1.24683	0.792328	-1.57363	0.115572	0.734283	0.421372	#N/A	#N/A	0.042486
SETD4	632.548	-1.31513	0.836037	-1.57305	0.115707	0.734283	0.40189	#N/A	#N/A	4.04e-13
KIF13A	871.078	1.11231	0.707037	1.57319	0.115674	0.734283	2.16191	#N/A	#N/A	0.99999
JAZF1	1252.53	-0.951158	0.604191	-1.57427	0.115425	0.734283	0.517217	#N/A	#N/A	0.89582
GPRC5A	37.681	4.42844	2.81657	1.57228	0.115885	0.734752	21.5325	#N/A	#N/A	6.79e-08
RAF1	2630.04	-0.676963	0.430651	-1.57195	0.115962	0.734861	0.625481	-0.322677	1	0.85295
SHISA4	1929.24	0.797698	0.508386	1.56908	0.11663	0.735316	1.73833	#N/A	#N/A	0.0009272
ZNF140	667.151	-1.16593	0.742051	-1.57122	0.116132	0.735316	0.445678	#N/A	#N/A	1.17e-06
EML2	746.277	-1.06916	0.681344	-1.5692	0.116602	0.735316	0.476596	0.717859	#N/A	5.76e-19
ARMC9	1346.69	-0.835991	0.532748	-1.5692	0.1166	0.735316	0.560198	1.71833	#N/A	6.2e-17
GPCPD1	1162.12	0.845344	0.538204	1.57068	0.116258	0.735316	1.79669	2.07476	#N/A	0.2018
PSMC1P1	3695.42	0.582535	0.371086	1.56981	0.116459	0.735316	1.49748	#N/A	#N/A	#N/A
NDUFS6	9886.05	0.363045	0.231246	1.56995	0.116427	0.735316	1.28614	-0.379927	#N/A	0.096359
CDH6	626.459	-1.40298	0.893301	-1.57055	0.116286	0.735316	0.378148	#N/A	#N/A	0.91966
CENPK	355.022	-1.68819	1.07531	-1.56995	0.116427	0.735316	0.310316	#N/A	#N/A	3.08e-11
ZNF79	189.838	-2.40273	1.53074	-1.56965	0.116496	0.735316	0.189107	#N/A	#N/A	0.0069622
FAM71D	2102.07	-0.838855	0.534784	-1.56859	0.116745	0.735664	0.559087	#N/A	#N/A	#N/A
TYSND1	296.604	-1.98484	1.26629	-1.56744	0.117011	0.736909	0.252642	#N/A	#N/A	0.00068197
ZNF256	268.768	-2.05495	1.31138	-1.56701	0.117111	0.736909	0.240658	#N/A	#N/A	0.0055297
PMM1	1439.9	-0.759704	0.484826	-1.56696	0.117123	0.736909	0.590617	0.124437	#N/A	1.66e-06
GAR1	2503.07	-0.746175	0.476267	-1.56672	0.117181	0.736909	0.596182	-0.383439	#N/A	0.10049
DIDO1	1233.46	-0.860616	0.549514	-1.56614	0.117316	0.737003	0.550717	#N/A	#N/A	1
EDF1	8398.53	-0.431246	0.275331	-1.56628	0.117282	0.737003	0.741621	-0.650183	#N/A	0.77742
RAB40B	397.998	-1.82908	1.16824	-1.56567	0.117426	0.737318	0.281443	#N/A	#N/A	8.66e-06
BMS1	1849.66	-0.749689	0.479051	-1.56495	0.117595	0.737474	0.594732	1.14642	#N/A	0.0001753
PHLDA2	381.834	1.38556	0.885559	1.56462	0.117672	0.737474	2.61274	#N/A	#N/A	0.15046
SERPINH1	62480.6	-0.293046	0.187278	-1.56477	0.117638	0.737474	0.816177	0.126885	#N/A	0.027553
TRPM4	208.656	2.20158	1.4074	1.56429	0.11775	0.737474	4.59983	2.12287	#N/A	5.65e-33
ZNF148	2252.45	-0.620763	0.396812	-1.56438	0.117729	0.737474	0.650327	#N/A	#N/A	0.99997
COL12A1	19811.9	0.304909	0.195021	1.56347	0.117943	0.738308	1.23534	1.17776	#N/A	0.97361
UBN2	868.268	0.884832	0.566064	1.56313	0.118022	0.738431	1.84655	#N/A	#N/A	0.99993
NTN4	834.008	-1.36839	0.876455	-1.56128	0.118457	0.740315	0.387322	#N/A	#N/A	0.91585
KIF3B	2044.09	0.740495	0.474346	1.56109	0.118503	0.740315	1.67075	0.666669	#N/A	0.084213
TGS1	363.488	1.4622	0.936629	1.56114	0.118492	0.740315	2.75529	#N/A	#N/A	1.1e-12
ARRDC4	2989.82	-0.782985	0.501739	-1.56054	0.118632	0.740369	0.581163	#N/A	#N/A	1.71e-07
LINC00312	278.15	-2.95867	1.89562	-1.56079	0.118572	0.740369	0.128633	#N/A	#N/A	#N/A
WDR1	9751.37	0.355275	0.22771	1.56021	0.11871	0.740483	1.27923	0.496513	#N/A	0.99892
TMEM107	1029.64	1.01826	0.652893	1.55961	0.118852	0.740617	2.02547	#N/A	#N/A	3.05e-08
SHROOM3	1340.47	-0.990258	0.63484	-1.55985	0.118795	0.740617	0.503388	#N/A	#N/A	0.31709
ZNF33A	290.507	1.49437	0.958972	1.5583	0.119162	0.741423	2.81741	#N/A	#N/A	1.97e-09
UNC45A	1271.72	1.12441	0.721405	1.55864	0.119082	0.741423	2.18012	1.17988	#N/A	3.27e-11
ISOC1	1536.53	0.717212	0.460195	1.5585	0.119116	0.741423	1.644	-0.382873	#N/A	6.1e-08
HIVEP3	330.363	2.30521	1.47973	1.55785	0.119268	0.741711	4.94239	#N/A	#N/A	0.90584
ARHGAP9	115.086	3.46804	2.22799	1.55658	0.11957	0.742903	11.0658	#N/A	#N/A	3.94e-11
ZFR2	85.2871	3.51376	2.25742	1.55654	0.11958	0.742903	11.4221	#N/A	#N/A	9.76e-26
IFT140	1278.61	-1.17885	0.757622	-1.55599	0.119712	0.742971	0.441704	0.163515	#N/A	9.91e-24
ATRN	161.122	-2.35388	1.51277	-1.55601	0.119706	0.742971	0.19562	0.172243	#N/A	1
MBD1	1516.12	0.796383	0.512027	1.55535	0.119862	0.743529	1.73674	#N/A	#N/A	0.99717
GPRIN2	180.695	2.56303	1.64947	1.55385	0.120221	0.744954	5.90945	#N/A	#N/A	3.86e-06
INO80D	840.537	-0.95158	0.612507	-1.55358	0.120284	0.744954	0.517066	#N/A	#N/A	0.99962
REEP5	3385.22	0.587656	0.378309	1.55338	0.120333	0.744954	1.5028	0.347768	#N/A	0.00069737
NCAPG2	131.552	-2.53515	1.63133	-1.55404	0.120175	0.744954	0.172521	#N/A	#N/A	0.97764
EIF2S1	1541.03	-0.667839	0.43004	-1.55297	0.120431	0.745186	0.629449	0.073132	#N/A	0.97031
MARCKSL1	15067.5	-0.381134	0.245469	-1.55267	0.120501	0.745245	0.767834	0.34234	#N/A	0.014253
L3MBTL1	79.2054	-2.73372	1.76119	-1.5522	0.120614	0.745567	0.150338	#N/A	#N/A	1.55e-12
RWDD3	1062.81	-0.918736	0.592292	-1.55115	0.120865	0.746371	0.528972	#N/A	#N/A	0.0014761
OTUD7B	731.819	-1.11261	0.717271	-1.55117	0.120862	0.746371	0.462458	-0.145488	#N/A	0.011339
KLC1	9522.12	0.398374	0.25695	1.5504	0.121046	0.746475	1.31802	0.0675904	#N/A	0.37095
FMNL1	149.341	2.76888	1.78794	1.54865	0.121467	0.746475	6.81578	#N/A	#N/A	0.99985
[truncated: 10,333 more rows]
