# Supplementary material for: Partial loss of CFIm25 causes learning deficits and aberrant neuronal alternative polyadenylation
Source: eLife. 2020 Apr 22;9:e50895. doi: 10.7554/eLife.50895 (PMC7176433; doi:10.7554/eLife.50895)
Supplement: Supplementary file 1. — Alternative polyadenylation (APA), Differentially expressed gene (DEG), probability of loss of function intolerance (pLI), intellectual disability (ID), Online Mendelian Inheritance in Man (OMIM), autosomal recessive (AR), autosomal dominant (AD), X-linked dominant (XLD), X-linked recessive (XLR) [file elife-50895-supp1.xlsx]

## Sheet: Sheet1
Gene	APA	DEG	pLI	ID association	OMIM inheritance
AKT3	1	-	0.99958	1	AD
ANKH	1	-	0.27856	1	AD
ATP2A2	1	-	0.99945	1	AD
ATP7A	1	-	0.99983	1	XLR
COX15	1	-	1.1031e-13	1	AR
DDHD2	1	-	1.4321e-10	1	AR
DMD	1	-	1	1	XLR
EPB41L1	1	-	0.87683	1	AD
GNAS	1	-	0.68076	1	AD
IDS	1	-	0.9964	1	XLR
IER3IP1	1	-	0.023402	1	AR
LAMP2	1	-	0.26698	1	XLD
MECP2	1	-	0.89382	1	XLD
MYO5A	1	-	0.944	1	AR
PAFAH1B1	1	-	0.99995	1	AD
PAK3	1	-	0.98716	1	XLR
PEX16	1	-	8.2934e-05	1	AR
PEX3	1	-	0.016335	1	AR
PLP1	1	-	0.92845	1	XLR
SDHA	1	-	2.6088e-10	1	AR
SLC1A4	1	-	0.06559	1	AR
TPP1	1	-	6.2564e-07	1	AR
UBR1	1	-	0.0054862	1	AR
ZEB2	1	-	1	1	AD
ZFYVE26	1	-	4.6948e-23	1	AR
ZNF592	1	-	0.99998	1	AR
ADAM10	1	-	1	-	-
ADAM17	1	-	0.99528	-	-
AGO1	1	-	1	-	-
AHR	1	-	0.99999	-	-
AKAP13	1	-	0.92909	-	-
AP2B1	1	-	0.9983	-	-
ARF4	1	-	0.95992	-	-
ARHGAP35	1	-	1	-	-
BAZ1B	1	-	1	-	-
CAMSAP1	1	-	0.99985	-	-
CAMSAP2	1	-	0.99999	-	-
CBLL1	1	-	0.99918	-	-
CD47	1	-	0.91924	-	-
COL3A1	1	-	1	-	-
COL4A5	1	-	1	-	-
CORO1C	1	-	0.99813	-	-
CPSF6	1	-	0.99982	-	-
CREBRF	1	-	0.99997	-	-
CSNK2A1	1	-	0.98711	-	-
CSTF2	1	-	0.99959	-	-
CYLD	1	-	0.99993	-	-
DAB1	1	-	0.99915	-	-
DDA1	1	-	0.93718	-	-
DOT1L	1	-	1	-	-
DPYSL3	1	-	0.99887	-	-
DR1	1	-	0.92117	-	-
EFNB2	1	-	0.98845	-	-
EHD1	1	-	0.98342	-	-
EIF4B	1	-	0.99999	-	-
EXOC5	1	-	0.99991	-	-
FAM155A	1	-	0.97586	-	-
FBXO32	1	-	0.99692	-	-
FBXW7	1	-	0.99949	-	-
FOSL2	1	-	0.98293	-	-
FZD5	1	-	0.98255	-	-
GAPVD1	1	-	1	-	-
GLS	1	-	0.96154	-	-
GMEB2	1	-	0.99495	-	-
GRAMD1B	1	-	0.99929	-	-
GRB10	1	-	0.93945	-	-
GSPT1	1	-	0.99986	-	-
HIPK1	1	-	1	-	-
HNRNPA3	1	-	0.99543	-	-
IGF1R	1	-	0.96799	-	-
ITCH	1	-	0.99997	-	-
KCMF1	1	-	0.97719	-	-
KDM5A	1	-	1	-	-
KIAA0368	1	-	1	-	-
KIF26B	1	-	0.99999	-	-
LAMC1	1	-	1	-	-
LCOR	1	-	0.95022	-	-
LUC7L3	1	-	0.99999	-	-
MAP4K4	1	-	1	-	-
MAPK1	1	-	0.99698	-	-
MAPRE1	1	-	0.99129	-	-
MGEA5	1	-	0.96569	-	-
MOB1A	1	-	0.95091	-	-
MORF4L1	1	-	0.99339	-	-
MPRIP	1	-	0.98078	-	-
MTMR12	1	-	0.99638	-	-
NDFIP1	1	-	0.97747	-	-
NFATC3	1	-	0.99813	-	-
NFIB	1	-	0.99861	-	-
NPAS2	1	-	1	-	-
NUP98	1	-	1	-	-
PBRM1	1	-	1	-	-
PCGF5	1	-	0.98007	-	-
PHF20	1	-	0.99875	-	-
PHF20L1	1	-	1	-	-
PLXNA1	1	-	0.99951	-	-
PPP1CB	1	-	0.99912	-	-
PPP1R12A	1	-	1	-	-
PPP4R2	1	-	0.99835	-	-
PREX1	1	-	1	-	-
PSMC2	1	-	0.99985	-	-
PTPN2	1	-	0.99953	-	-
RAB11FIP2	1	-	0.94451	-	-
RAD23B	1	-	0.9963	-	-
RBM17	1	-	0.99981	-	-
RFC1	1	-	0.97305	-	-
RNF145	1	-	0.98031	-	-
RRAS2	1	-	0.97463	-	-
RYK	1	-	0.98922	-	-
SEL1L	1	-	0.98233	-	-
SEPHS1	1	-	0.97637	-	-
SH3GLB1	1	-	0.99407	-	-
SLC40A1	1	-	0.98835	-	-
SLC6A6	1	-	0.98987	-	-
SMARCA5	1	-	1	-	-
SNX1	1	-	0.93179	-	-
SPTY2D1	1	-	0.94476	-	-
SRGAP1	1	-	0.99845	-	-
SRPK2	1	-	0.99697	-	-
ST18	1	-	0.99459	-	-
STK38L	1	-	0.93427	-	-
STXBP5	1	-	0.99956	-	-
SYT11	1	-	0.92676	-	-
TLK1	1	-	0.99999	-	-
TM9SF2	1	-	1	-	-
TM9SF3	1	-	0.99999	-	-
TMEM164	1	-	0.94373	-	-
UBE2R2	1	-	0.97816	-	-
UBE3C	1	-	1	-	-
USP19	1	-	0.99999	-	-
USP7	1	-	1	-	-
WDFY3	1	-	1	-	-
WDR26	1	-	1	-	-
WDR48	1	-	0.99985	-	-
WDR5	1	-	0.99978	-	-
WWP1	1	-	0.99966	-	-
XRCC5	1	-	0.99999	-	-
YIPF5	1	-	0.98529	-	-
ZBTB10	1	-	0.99067	-	-
ZBTB47	1	-	0.99983	-	-
ZFX	1	-	0.99831	-	-
ZNF512B	1	-	0.99992	-	-
ZNF516	1	-	0.99992	-	-
ZNRF1	1	-	0.90588	-	-
MEF2C	-	1	0.017256	1	AD
RELN	-	1	1	1	AD
SLC7A7	-	1	7.9543e-07	1	AR
ARSE	-	1	0.58982	1	XLR
DLX1	-	1	0.96232	-	-
ANO8	-	1	0.95634	-	-
SLC44A1	-	1	0.99676	-	-
TRIB2	-	1	0.98349	-	-
RAPGEF5	-	1	0.98099	-	-
ATAD5	-	1	1	-	-
NUDT21	-	1	0.98576	-	-
MAOB	-	1	0.99903	-	-
DLX2	-	1	0.97847	-	-
CALD1	-	1	0.99879	-	-
RBPMS	-	1	0.97173	-	-
KLHL3	-	1	0.94479	-	-
ELFN1	-	1	0.99882	-	-
SRSF1	-	1	0.98268	-	-
OLFM1	-	1	0.99679	-	-
RPL6	-	1	0.99326	-	-
ANGPT1	-	1	0.95208	-	-
DAGLA	-	1	0.99999	-	-
SPCS2	-	1	0.92879	-	-
SEPT9	-	1	0.99579	-	-
